# Supplementary material for: TcellSubC: An Atlas of the Subcellular Proteome of Human T Cells
Source: PubMed Central journal article supplement (PMC6902019; doi:10.3389/fimmu.2019.02708), 2019-11-26
Supplement: Image_2.pdf [file Image_2.pdf]

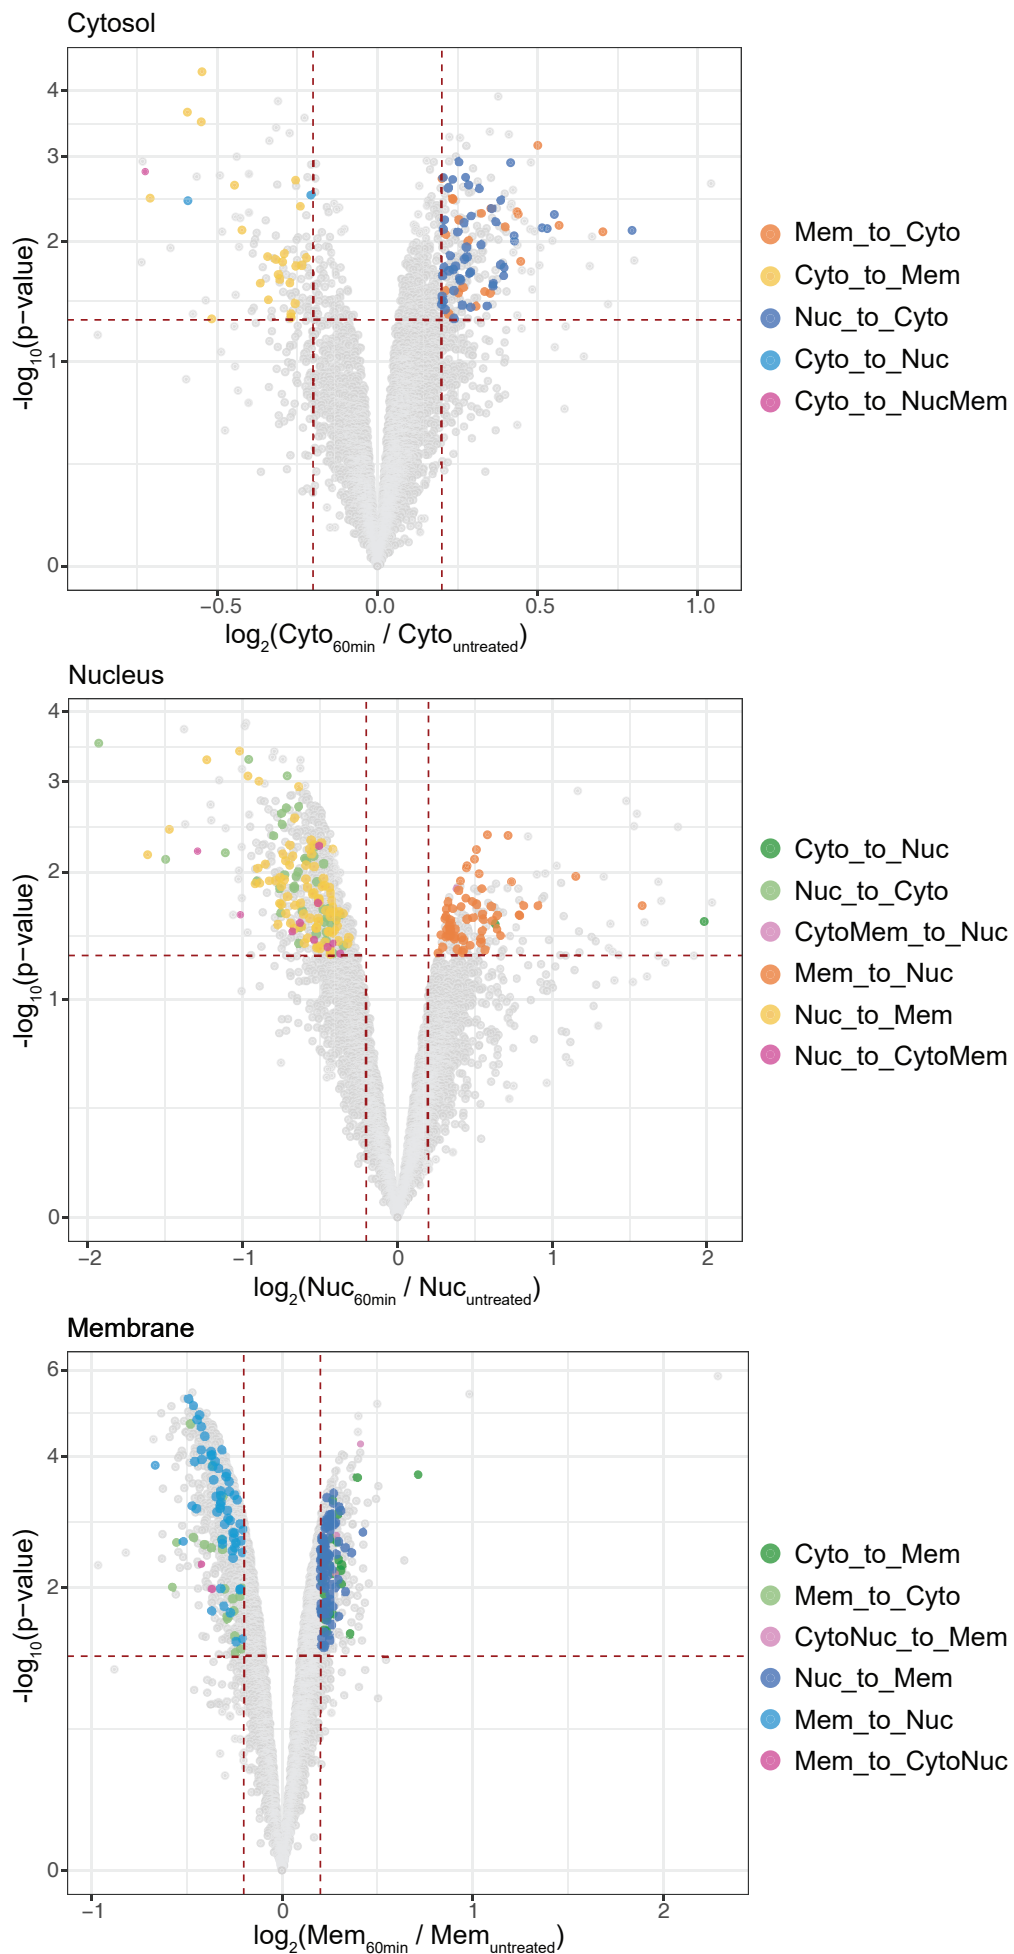

**Figure S2. Volcano plots of TCR stimulated cells compared to unstimulated cells.**

The  $\log_2$  foldchange (60 min/untreated) for individual proteins is plotted against the DeqMS calculated p-value for each individual compartment (Cytosol, Nucleus and Membrane). Proteins that fulfilled the criteria for translocation (opposite direction of change in at least 2 compartments with an absolute  $\log_2$  foldchange  $>0.201$  as well as a p-value  $<0.05$  in both) are highlighted and color coded based on the translocation as denoted above.
