# Supplementary material for: TcellSubC: An Atlas of the Subcellular Proteome of Human T Cells
Source: PubMed Central journal article supplement (PMC6902019; doi:10.3389/fimmu.2019.02708), 2019-11-26
Supplement: Image_3.pdf [file Image_3.pdf]

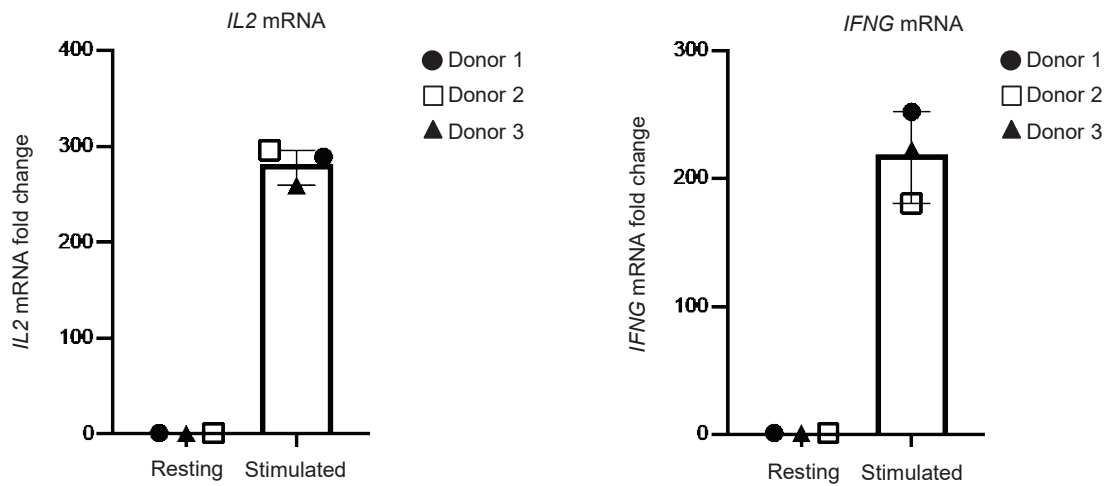

**Figure S3. Quality control analysis of T cells used for proteomics**

Aliquots of T cells from all the 3 donors were stimulated for 3 hours with cross linked anti-CD3/anti-CD28 antibodies (TCR stimulation) or processed as untreated prior to subcellular fractionation. The expression of *IL2* (left) and *IFNG* (right) mRNA were measured by qRT-PCR and normalized to *GAPDH* mRNA. Results are presented as fold change compared to unstimulated samples (set to 1). Donors are represented with individual shapes (mean  $\pm$  range of donors).
