# Supplementary material for: TcellSubC: An Atlas of the Subcellular Proteome of Human T Cells
Source: Front Immunol. 2019 Nov 26;10:2708. doi: 10.3389/fimmu.2019.02708 (PMC6902019; doi:10.3389/fimmu.2019.02708)
Supplement: Supplementary file 1 [file Table_1.XLSX]

## Sheet: Legend
		Sheet	Description
		Table S1 - TMTratios	TMTratios from all 3 analyzed sets.
		Table S1 - DeqMSoutput	DeqMSanalysis of pairwise comparions between the untreated (ctrl) and 60 minutes (60) timepoints for all three fractions (cyto, nuc, mem)
		TableS1-Transloc. candidates	List of 237 proteins that were found to be candidates for treatment induced translocation (60 min of TCR stimulaion).
		Columns	Description
		e.g. Cyto_60_donor2_127C	Sample identifier listing fraction (Cyto, Nuc, Mem and internal standard;IS), timepoint (ctrl, 15, 60), donor (1,2,3) and TMTchannel.
		PSM count - median all sets	Median number of PSMs used for identification across the 3 sets.
		logFC	log2 foldchange of difference between control and 60 minutes of treatment for indicated fraction.
		sca.P.Value	p-value for the difference between control and 15 or 60 minutes of treatment for indicated fraction.
		sca.adj.pval	Benjamini-Hochberger corrected p-value for the difference between control and 15 or 60 minutes of treatment for indicated fraction.

## Sheet: Table S1-TMTratios
Protein accession	cyto_Ctrl_donor1_126	cyto_15_donor1_127N	cyto_60_donor1_127C	mem_Ctrl_donor1_128N	mem_15_donor1_128C	mem_60_donor1_129N	nuc_Ctrl_donor1_129C	nuc_15_donor1_130N	nuc_60_donor1_130C	IS_donor1_131	cyto_Ctrl_donor2_126	cyto_15_donor2_127N	cyto_60_donor2_127C	mem_Ctrl_donor2_128N	mem_15_donor2_128C	mem_60_donor2_129N	nuc_Ctrl_donor2_129C	nuc_15_donor2_130N	nuc_60_donor2_130C	IS_donor2_131	cyto_Ctrl_donor4_126	cyto_15_donor4_127N	cyto_60_donor4_127C	mem_Ctrl_donor4_128N	mem_15_donor4_128C	mem_60_donor4_129N	nuc_Ctrl_donor4_129C	nuc_15_donor4_130N	nuc_60_donor4_130C	IS_donor4_131
A1BG	0.932514	0.969071	0.79155	1.32171	1.18302	1.24957	3.35068	2.00746	2.59926	1	1.12193	1.16008	0.871636	1.29285	1.3358	1.11956	2.06275	1.7986	2.08014	1	1.20213	1.02769	0.94454	1.36106	1.28315	1.27662	2.14524	2.26578	2.77617	1
AACS	1.60788	1.48111	1.50702	0.713434	0.737346	0.633472	0.468083	0.931337	1.26946	1	1.44819	1.53538	1.46406	0.615609	0.693466	0.567612	0.450229	0.697811	0.746048	1	1.73965	2.02458	1.97237	0.625322	0.531419	0.489708	1.03387	0.924405	0.874343	1
AAGAB	1.52059	1.54298	1.38983	0.656307	0.68451	0.65329	0.785668	0.977499	1.22431	1	1.70577	1.69575	1.24513	0.919794	0.871027	0.819896	0.616147	0.499946	0.754009	1	0.910348	0.846722	1.32759	0.662841	0.990897	0.649699	1.69782	0.820662	1.18567	1
AAK1	1.55474	1.55126	1.50987	0.829212	0.790111	0.811654	0.570876	0.60506	0.62726	1	1.60242	1.60341	1.61551	0.831564	0.793329	0.727205	0.506905	0.498057	0.420731	1	1.46447	1.52906	1.56752	0.763679	0.733945	0.613724	0.551863	0.539345	0.503734	1
AAMDC	1.05229	1.09352	1.20572	0.734495	0.775313	0.717677	0.825001	1.06882	1.02477	1	1.95947	1.75164	1.99927	0.641041	0.761873	0.684742	0.533184	0.706063	0.728259	1	1.18151	1.18695	1.30141	0.871593	0.825255	0.854615	1.47483	1.05976	1.87943	1
AAMP	1.53432	1.45643	1.52173	0.606328	0.639723	0.582021	0.504231	0.383638	0.373869	1	1.43372	1.36985	1.42475	0.588824	0.628145	0.474764	0.339614	0.312761	0.61413	1	1.76029	1.90774	1.93651	0.686154	0.553353	0.458057	0.342247	0.361645	0.515393	1
AAR2	1.41786	1.26279	1.33361	0.763036	0.821078	0.874568	0.741344	0.872979	0.871584	1	1.10568	0.974982	1.08425	1.192	1.23018	1.17102	1.27451	1.22748	1.17118	1	0.992354	1.02133	0.971473	1.17643	1.20225	1.2177	1.65472	1.26928	1.60226	1
AARS	1.73849	1.79678	1.73216	0.624289	0.609472	0.525083	0.497254	0.488952	0.528683	1	1.64306	1.66197	1.60522	0.532529	0.544588	0.397296	0.37563	0.404136	0.431928	1	2.07301	2.08262	2.06898	0.595916	0.528926	0.418899	0.414956	0.466341	0.417435	1
AARS2	0.30812	0.292038	0.310122	1.98612	1.86667	2.08564	1.09834	1.06132	0.930389	1	0.298446	0.321187	0.355841	1.98542	1.81883	2.21795	0.801258	0.896786	0.687546	1	0.400369	0.382496	0.396309	1.98013	2.20582	2.31651	0.996807	1.01262	0.870722	1
AASDHPPT	1.60891	1.55438	1.58733	0.665876	0.620201	0.513462	0.567973	0.423589	0.532572	1	1.69389	1.74046	1.59901	0.670091	0.69494	0.540357	0.450516	0.442105	0.468234	1	1.67732	1.75391	1.73726	0.696769	0.684261	0.577428	0.450269	0.480825	0.367954	1
AASS	0.370599	0.389676	0.375764	1.39013	1.44222	1.62408	0.631679	0.736323	0.45589	1	0.391612	0.423993	0.401724	2.1159	1.98795	2.3938	0.710454	0.914962	0.768923	1	0.505595	0.583822	0.560859	1.63856	1.5998	1.83001	0.84416	0.889361	0.826992	1
AATF	0.352438	0.406341	0.392318	0.684665	0.730452	0.678609	4.73846	3.01267	4.92609	1	0.376156	0.327873	0.367412	0.539742	0.554822	0.559574	5.16938	3.8545	3.48656	1	0.300093	0.327629	0.327002	0.606842	0.722091	0.628412	4.44574	3.85567	8.61767	1
ABAT	0.351138	0.367057	0.364514	2.55152	2.51411	2.234	1.06205	0.991519	0.851413	1	0.443688	0.44236	0.491717	2.29683	2.02184	2.44393	0.684793	0.978602	0.46396	1	0.355623	0.370388	0.299493	1.71866	1.68406	1.99098	0.56842	0.702561	0.386276	1
ABCB1	0.308321	0.311628	0.33288	1.5823	1.44542	1.74126	0.881928	1.00612	0.885728	1	0.52826	0.428869	0.476495	2.83275	2.47543	3.15344	1.36542	1.51344	1.01724	1	0.402629	0.404488	0.406249	1.3772	1.65933	1.64912	0.697812	0.720425	0.572333	1
ABCB10	0.378288	0.47215	0.398895	1.87179	1.53753	1.97464	0.662591	0.811775	0.4822	1	0.167151	0.149322	0.165927	2.16501	1.96207	2.58358	0.461011	0.713631	0.383182	1	0.373874	0.407156	0.464864	1.84894	1.98666	2.30241	0.882307	0.9965	0.732072	1
ABCB7	0.318519	0.323421	0.356284	2.14726	2.04784	2.40518	0.933041	1.07089	0.754061	1	0.235154	0.249808	0.227758	2.10639	2.0087	2.48637	0.660153	0.86771	0.609572	1	0.459555	0.372165	0.382193	1.96957	2.0976	2.32464	1.21277	1.20537	0.985532	1
ABCB8	0.536363	0.506983	0.512127	1.65686	1.55439	1.85314	1.08062	0.923086	0.979818	1	0.372217	0.300681	0.341675	2.10549	1.86833	2.23284	0.74883	0.813158	0.557563	1	0.435745	0.462118	0.473433	1.7133	1.86035	2.03065	1.00338	1.056	1.13552	1
ABCC1	0.384367	0.374596	0.377717	2.10442	2.01238	2.25329	1.02694	1.12723	0.861146	1	0.331678	0.335683	0.372961	1.69909	1.61392	2.03416	0.89366	0.996276	0.921572	1	0.487501	0.489675	0.523142	1.78646	1.95295	2.12671	1.10099	1.09621	0.987154	1
ABCC4	0.395062	0.483509	0.394515	1.56587	1.47285	1.69655	0.985589	0.951066	0.95287	1	0.562816	0.340119	0.605928	2.25308	2.04301	2.73769	0.626684	1.02411	1.01914	1	0.507617	0.447335	0.519872	1.59292	1.74771	1.63572	1.01764	1.01025	1.1623	1
ABCC5	0.658421	0.492438	0.501345	3.84852	5.10568	5.89164	3.76791	1.01671	2.60897	1	0.537604	0.466962	0.499966	1.9036	2.03892	2.41508	1.4361	1.63968	1.57177	1	0.33327	0.307189	0.371127	2.06315	2.87685	2.96198	1.32404	1.03553	1.51293	1
ABCD1	0.439611	0.428971	0.495911	1.56538	1.70548	1.76746	1.4076	1.43535	1.51729	1	0.509542	0.461602	0.499935	2.32885	2.1272	2.61412	0.900944	0.918338	0.749794	1	0.389107	0.403778	0.446262	1.785	1.88381	2.13978	0.865096	1.11042	0.492599	1
ABCD2	0.386139	0.408442	0.413529	2.24158	2.07053	2.32939	1.58114	1.37376	1.30766	1	0.213543	0.22833	0.247039	1.57244	1.43652	1.81978	0.894866	0.896152	0.96206	1	0.388417	0.399353	0.415301	1.80489	1.8505	2.15135	1.22985	1.26044	0.944825	1
ABCD3	0.429783	0.429163	0.437589	1.77539	1.74117	1.97531	1.66328	1.63454	1.38979	1	0.312518	0.313708	0.241911	2.19666	1.99561	2.29202	1.49771	1.50529	1.40789	1	0.499261	0.420631	0.365978	1.52195	1.70642	1.70864	1.1944	1.22676	1.33432	1
ABCE1	1.65521	1.61792	1.71864	0.77779	0.778864	0.698659	0.610471	0.657064	0.62173	1	1.62569	1.67367	1.62234	0.698429	0.715147	0.581151	0.51576	0.489528	0.558429	1	1.61126	1.58987	1.60934	0.614436	0.593042	0.544671	0.534664	0.530299	0.589941	1
ABCF1	1.44513	1.41491	1.53887	0.672009	0.669874	0.616713	0.992358	1.10011	1.37661	1	1.3871	1.41381	1.39851	0.749254	0.731539	0.653359	1.06807	1.06561	1.10523	1	1.43132	1.42321	1.50454	0.712057	0.663465	0.598402	0.936964	0.928523	1.17179	1
ABCF2	1.2273	1.29131	1.34812	0.74881	0.727771	0.734111	0.972798	0.982699	1.27207	1	1.41279	1.41257	1.39432	0.881782	0.894166	0.848866	1.14693	1.03391	1.00524	1	1.25627	1.23836	1.22328	0.841257	0.89607	0.787555	0.758133	0.800258	0.800257	1
ABCF3	1.68963	1.6762	1.62653	0.666653	0.613506	0.575465	0.374817	0.460355	0.418455	1	1.66657	1.70826	1.63861	0.809946	0.835048	0.750605	0.509358	0.662662	0.599305	1	1.75391	1.76694	1.71102	0.610161	0.600188	0.504093	0.46409	0.491818	0.414557	1
ABHD10	0.360733	0.38513	0.398151	1.99734	2.10921	1.84557	1.13788	1.17477	0.953526	1	0.30982	0.296613	0.295536	2.37185	2.09036	2.46776	0.796278	0.930149	0.667516	1	0.484162	0.469283	0.42806	1.93042	1.92655	2.10246	0.966629	0.987992	0.858708	1
ABHD11	0.182059	0.169964	0.223855	2.12563	2.02238	2.89859	0.923143	1.08553	0.516651	1	0.385386	0.38901	0.4012	2.87586	2.12389	2.74019	0.643737	1.02011	0.615985	1	0.391012	0.32072	0.328399	1.6652	1.71109	1.92219	0.652943	0.844849	0.44064	1
ABHD12	0.286685	0.227896	0.224221	1.95254	1.83281	2.19619	1.02786	1.00079	0.917742	1	0.15307	0.169004	0.169735	2.08051	1.81549	2.58796	0.795232	1.04319	0.574371	1	0.679878	0.444807	0.407735	2.17645	2.61358	2.60171	1.23772	1.17208	0.776893	1
ABHD14B	1.8122	1.7982	1.9357	0.576982	0.604049	0.464615	0.543053	0.510538	0.554305	1	1.71149	1.78853	1.77158	0.676533	0.643948	0.424526	0.519064	0.56874	0.605043	1	1.51928	1.54506	1.8272	0.584023	0.504037	0.386857	0.558375	0.512034	0.582166	1
ABHD15	0.327965	0.316604	0.330281	1.92582	2.01032	2.26854	1.08106	1.01082	0.72347	1	0.513513	0.430027	0.43061	1.99377	1.68358	2.29305	0.863478	0.89955	0.837572	1	0.243925	0.26332	0.318669	1.18782	1.14672	1.32061	3.02876	3.56986	7.19908	1
ABHD16A	0.434462	0.412554	0.449956	1.74277	1.71711	1.90188	1.12575	0.987765	0.846701	1	0.530179	0.517788	0.568604	1.82065	1.6465	2.05026	0.751335	0.997452	0.766525	1	0.666353	0.693602	0.570596	1.85019	2.02233	2.24036	0.87847	1.05994	0.671699	1
ABHD17A	0.475577	0.446357	0.426693	1.78314	1.66483	2.12203	1.02481	0.979655	0.738669	1	0.299764	0.287314	0.274764	1.65396	1.49518	1.75642	0.65446	1.10091	0.670036	1	0.582258	0.570187	0.582993	2.11452	2.38304	2.33065	0.933408	0.818971	0.5708	1
ABHD6	0.786218	0.801285	0.603704	1.42791	1.50936	1.61826	0.781921	1.25604	1.50696	1	0.455008	0.445641	0.553206	2.00245	1.84852	1.9662	0.786252	0.79555	0.812179	1	0.407527	0.583246	0.637252	1.78024	2.17733	2.08381	0.700927	0.852019	0.539471	1
ABI1	1.51764	1.49143	1.51753	0.902922	0.955023	0.866366	0.575331	0.62178	0.54388	1	1.42772	1.56421	1.50562	0.862123	0.87635	0.818052	0.504665	0.577271	0.606552	1	1.43497	1.5646	1.58568	0.768206	0.703616	0.647327	0.559631	0.660678	0.583741	1
ABI2	1.34898	1.42363	1.14107	0.802327	0.816504	0.914984	0.755205	1.1438	0.961272	1	1.10067	1.40048	1.00969	0.576118	0.718448	0.820942	0.385236	0.458284	0.579367	1	1.80856	1.96301	1.9291	0.891096	0.934349	0.849912	0.520149	0.652863	0.617415	1
ABI3	1.3401	1.44371	1.30885	0.701775	0.679251	0.59854	0.562909	0.598234	0.719502	1	1.59992	1.53507	1.6664	1.15664	1.10615	1.06432	0.998703	0.927529	0.851	1	1.35461	1.43301	1.39111	0.781714	0.784966	0.798141	0.855142	0.799898	1.00251	1
ABL1	0.987999	0.9377	1.04431	0.855229	0.822065	0.861784	1.18303	1.35013	1.82221	1	1.06971	1.08418	1.21369	0.951877	0.985271	1.00715	1.41314	1.27796	1.39019	1	1.12974	1.06101	1.13136	0.993958	1.04508	0.955328	1.33489	1.27248	1.66441	1
ABL2	1.02919	0.951529	1.30382	0.982472	0.893784	0.897529	1.21734	0.945515	0.770492	1	1.05117	1.19756	1.03112	1.29288	1.27983	1.56535	1.07836	1.08442	0.951703	1	1.06575	1.2047	1.04772	0.828277	1.21858	1.26145	0.696339	0.665339	0.414023	1
ABLIM1	1.04453	0.966255	0.869635	0.71679	0.680274	0.680442	1.35346	1.85322	2.42471	1	0.922034	0.774721	0.77465	0.632926	0.59274	0.619931	2.51043	1.96848	1.71609	1	1.01058	0.945088	0.817225	0.816877	0.860046	0.782394	2.62421	2.31874	3.00938	1
ABR	1.49876	1.51363	1.49215	0.736382	0.702073	0.670629	0.798367	0.665089	0.629787	1	1.65196	1.65833	1.62624	0.861013	0.84615	0.724308	0.438101	0.47251	0.416887	1	1.64489	1.57984	1.63606	0.770652	0.690391	0.657838	0.522927	0.630328	0.517238	1
ABRACL	0.460034	0.778344	0.549958	0.311786	0.320084	0.227714	0.251625	0.229379	0.176685	1	1.0976	1.62682	1.41846	0.60423	0.488372	0.45375	0.124731	0.214532	0.308365	1	2.2889	3.12118	2.07576	0.716345	0.554453	0.477963	0.374815	0.490756	0.248274	1
ABT1	0.730477	0.666234	0.70055	1.15892	1.14612	1.2736	2.55152	1.84445	2.10113	1	0.69474	0.549867	0.596767	1.19841	1.20626	1.31787	2.49876	2.27161	1.79956	1	0.5614	0.633504	0.617921	1.27194	1.26485	1.28256	1.64311	1.6269	2.62257	1
ACAA1	0.310763	0.2949	0.31858	2.82501	2.60889	2.77767	0.93856	0.990334	0.591415	1	0.455735	0.458661	0.4183	2.38503	2.10788	2.53304	0.720601	0.885689	0.778245	1	0.169517	0.21061	0.244207	2.06169	1.9145	2.32278	0.708744	0.690284	0.432066	1
ACAA2	0.276739	0.321149	0.307815	2.06944	2.07853	1.8666	0.911262	0.746269	0.488256	1	0.260694	0.281812	0.283044	2.84762	2.39605	3.02101	0.83767	1.05124	0.577479	1	0.289138	0.291976	0.291039	2.50979	2.49109	2.91394	0.88562	0.981766	0.51499	1
ACACA	1.93624	1.83819	1.83357	0.661262	0.586883	0.57505	0.401369	0.502695	0.468581	1	1.64918	1.76077	1.71012	0.696288	0.80243	0.606833	0.574639	0.622086	0.86561	1	1.56009	1.59732	1.51057	0.58476	0.575527	0.49077	0.675482	0.663316	0.653784	1
ACAD10	0.45809	0.466019	0.482685	2.14091	1.93162	2.42888	1.16959	1.42167	1.33124	1	0.574359	0.641232	0.620488	1.61743	1.51241	1.79117	0.927126	1.02242	1.05982	1	0.407852	0.461543	0.477591	1.65441	1.75101	1.96785	1.00156	1.05436	1.24799	1
ACAD8	0.389735	0.386221	0.371608	1.94768	1.89123	1.86667	0.798432	0.831316	0.539999	1	0.373198	0.352741	0.364529	2.43425	1.99395	2.536	0.787129	1.00923	0.551623	1	0.473861	0.455643	0.447815	2.13395	2.14163	2.36036	0.881662	1.03754	0.68293	1
ACAD9	0.273246	0.278443	0.273091	2.18727	2.06385	2.16228	0.959699	0.944808	0.557772	1	0.22832	0.227935	0.250078	2.33524	2.01443	2.51123	0.638618	0.923785	0.498855	1	0.288224	0.321067	0.318584	1.94624	2.04214	2.28584	1.02679	1.04367	0.703947	1
ACADM	0.363602	0.350659	0.360321	2.19135	2.09347	1.98161	0.946983	0.914874	0.673825	1	0.251637	0.26061	0.26874	2.10371	1.90019	2.17753	0.592701	0.73249	0.403472	1	0.413734	0.401137	0.360214	2.34118	2.22811	2.54718	1.05301	1.17298	0.720119	1
ACADS	0.369807	0.382665	0.389171	2.48836	2.45614	2.38778	1.32936	1.1652	0.989701	1	0.339046	0.409479	0.353845	2.289	1.94326	2.43554	0.71418	0.870061	0.752681	1	0.392856	0.371456	0.402182	1.92871	1.88674	2.18457	0.832094	0.867288	0.619506	1
ACADSB	0.309274	0.317826	0.33403	2.11712	2.03643	2.2523	0.946494	0.995418	0.697274	1	0.168875	0.190225	0.194691	2.52331	2.1359	2.80262	0.614045	0.860157	0.390034	1	0.220774	0.251461	0.274573	2.25979	2.43165	2.58747	0.883135	0.940186	0.50085	1
ACADVL	0.36024	0.374103	0.384738	2.43148	2.22848	2.36638	1.0697	1.02281	0.773396	1	0.29676	0.31028	0.302629	2.31692	2.08707	2.41513	0.86219	0.945133	0.703916	1	0.374524	0.366813	0.361175	2.03017	2.02101	2.31038	0.883011	1.00394	0.626561	1
ACAP1	1.61352	1.6826	1.61061	0.833553	0.792736	0.796715	0.614135	0.661365	0.721282	1	1.67333	1.74113	1.6875	0.810791	0.774133	0.7016	0.553401	0.647058	0.695493	1	1.5146	1.38829	1.44386	0.735353	0.691605	0.61378	0.647454	0.602493	0.593595	1
ACAP2	1.64449	1.58273	1.68559	0.644283	0.65049	0.566461	0.515658	0.474203	0.590104	1	1.72062	1.7823	1.71224	0.629654	0.696924	0.495988	0.373052	0.446535	0.46322	1	1.75954	1.79806	1.87992	0.637961	0.53402	0.511542	0.553312	0.464225	0.529137	1
ACAT1	0.34074	0.354941	0.355915	2.03592	2.04511	2.03132	0.89625	0.8534	0.589853	1	0.25166	0.249694	0.26432	2.89229	2.59048	3.06447	0.902953	1.05832	0.678259	1	0.253818	0.28611	0.287505	2.36646	2.3338	2.66315	0.977059	1.0208	0.670879	1
ACAT2	1.44683	1.4918	1.52993	0.589575	0.609141	0.436982	0.645671	0.687157	0.78248	1	1.61571	1.65864	1.65107	0.579422	0.686368	0.517704	0.561875	0.455182	0.573354	1	1.85911	1.83387	1.86929	0.725387	0.60448	0.577721	0.710212	0.641731	0.802361	1
ACBD3	0.599991	0.530863	0.588284	1.77624	1.66476	1.78339	0.801658	0.807092	0.808438	1	0.584209	0.624538	0.673988	1.79026	1.7038	1.90053	0.55779	0.692774	0.500316	1	0.686351	0.746495	0.842743	1.88889	1.61079	1.80401	0.74116	0.743963	0.433016	1
ACBD5	0.327464	0.315366	0.378287	1.94584	1.74441	2.20953	0.796009	1.09281	0.995335	1	0.629308	0.680596	0.53179	2.08785	1.77849	2.18394	1.32806	1.29653	1.23542	1	0.758124	0.515848	0.687852	1.35216	1.25551	1.5838	0.954475	1.05093	0.775787	1
ACBD6	1.44561	1.57265	1.57307	0.652551	0.642129	0.645251	0.75014	0.566563	0.585655	1	1.66494	1.68825	1.66922	0.67931	0.65851	0.536314	0.383565	0.480098	0.413466	1	1.55634	1.59896	1.72294	0.750631	0.596671	0.598362	0.67826	0.690251	0.574339	1
ACD	0.952999	1.01518	0.953294	0.504325	0.612497	0.585747	2.94341	2.87424	4.31932	1	0.880329	0.744419	0.776273	0.665104	0.740071	0.613071	4.15136	3.56392	3.324	1	0.535027	0.549818	0.572636	0.619	0.677661	0.678306	3.79306	3.14092	4.05577	1
ACE	0.605869	0.431953	0.692226	1.28254	0.9837	1.06437	1.44754	1.24239	1.16574	1	0.566014	0.591646	0.997479	2.14047	1.57807	2.1649	0.642017	1.02737	0.820551	1	0.873155	0.644983	1.40962	2.51549	1.80629	1.90097	1.54843	1.25136	0.531945	1
ACIN1	0.353152	0.347632	0.363149	0.61964	0.688002	0.7254	3.11749	3.85652	4.8077	1	0.327368	0.337653	0.329453	0.620431	0.639656	0.692358	5.08949	4.28833	3.94373	1	0.338896	0.33619	0.339924	0.674756	0.799291	0.720419	4.56653	3.67343	5.41383	1
ACLY	1.18619	1.23901	1.19259	1.21749	1.19919	1.20633	0.683207	0.773205	0.649694	1	1.26996	1.28987	1.3068	1.41818	1.37674	1.34825	0.637153	0.747233	0.668933	1	1.11566	1.15752	1.16834	1.34852	1.30423	1.29437	0.794814	0.898689	0.726242	1
ACO1	1.69687	1.6561	1.70349	0.759963	0.749123	0.586144	0.511514	0.542726	0.582142	1	1.65034	1.6804	1.54922	0.714653	0.693972	0.56057	0.711753	0.835575	0.841881	1	1.62408	1.64805	1.6006	0.63928	0.621601	0.577447	0.744964	0.780714	0.856629	1
ACO2	0.330935	0.331589	0.341538	2.30884	2.32667	2.11357	1.10858	0.95216	0.740796	1	0.308204	0.319701	0.302459	2.51815	2.2833	2.62662	0.770316	0.903549	0.652867	1	0.318747	0.320095	0.325341	2.02497	1.99806	2.30693	0.813302	0.909642	0.53944	1
ACOT13	0.285638	0.312058	0.337311	2.30477	2.08392	2.2783	0.96706	1.21151	0.672772	1	0.322736	0.35254	0.301061	2.12394	1.69603	2.12952	0.90023	0.929073	0.635626	1	0.393653	0.379294	0.417489	2.38899	2.46047	2.73392	0.965947	1.08201	0.680021	1
ACOT7	1.48474	1.52188	1.54604	0.468345	0.584261	0.425685	0.459141	0.274985	0.247315	1	2.14238	2.24531	1.83627	0.73817	0.922418	0.672443	0.804763	0.893183	1.13039	1	1.38486	1.40227	1.32677	1.19462	1.01196	1.01696	0.663476	0.894047	0.870606	1
ACOT8	0.469518	0.467042	0.450669	1.43996	1.43057	1.55032	2.21225	2.43465	2.66987	1	0.539641	0.510162	0.540376	2.13593	2.2665	2.33955	1.26776	1.69005	1.7591	1	0.507033	0.49785	0.539208	1.5289	1.80776	1.49869	1.86491	1.54529	2.14559	1
ACOT9	0.194829	0.212469	0.260067	1.64374	1.69394	1.96575	1.23702	1.32065	1.33182	1	0.371543	0.391139	0.42227	2.35789	2.06275	2.61889	1.59994	1.87069	1.48519	1	0.380135	0.392998	0.352056	1.89619	1.91632	2.09509	1.26721	1.20526	1.08737	1
ACOX1	0.31721	0.33968	0.35608	2.37772	2.25262	2.22646	1.17387	0.967145	0.660914	1	0.208957	0.253675	0.259314	2.47563	2.18419	2.61125	0.636747	0.781025	1.04948	1	0.298439	0.311396	0.311659	2.39465	2.23686	2.67763	0.907649	1.11407	0.647692	1
ACOX3	0.332438	0.394221	0.380047	2.72732	2.61124	2.62443	0.992356	0.887662	0.529535	1	0.340238	0.406857	0.330529	2.42828	2.07602	2.62057	1.10207	1.17655	1.10923	1	0.468236	0.388756	0.419203	1.84972	1.92519	1.98444	1.20648	1.32901	1.06052	1
ACP1	1.77084	1.84343	1.7644	0.935877	0.90886	0.778511	0.704952	0.479682	0.463681	1	1.38483	1.39376	1.42596	0.781043	0.82735	0.752394	0.760401	0.708348	0.801221	1	1.80448	1.80632	1.72871	0.779103	0.674739	0.590017	0.592767	0.526868	0.619697	1
ACP2	0.995237	0.97345	1.03534	1.54571	1.48199	1.46428	0.841456	0.728568	0.598038	1	0.970532	0.873512	0.934284	1.38004	1.33239	1.45319	1.91961	1.73946	1.64768	1	0.81757	0.853147	0.792841	1.28465	1.3582	1.43965	1.52591	1.35806	1.90742	1
ACP6	0.201568	0.218871	0.278566	2.038	1.83979	1.78391	0.856613	0.85848	0.685982	1	0.304978	0.304037	0.337548	2.67006	2.33905	2.64105	0.879528	0.947275	0.65183	1	0.452477	0.485806	0.456487	2.25223	2.324	2.51835	0.845638	0.909851	0.553506	1
ACSF2	0.291973	0.302121	0.295409	2.47874	2.04952	2.26732	1.17743	0.992795	0.676241	1	0.231	0.287419	0.288471	2.04747	1.9274	2.34663	0.50361	0.782	0.327252	1	0.293897	0.326127	0.302807	2.27237	2.2288	2.57731	0.777453	0.969099	0.548973	1
ACSF3	0.368152	0.375564	0.354689	1.7125	1.65066	1.87931	0.83051	0.859672	0.629627	1	0.330381	0.332613	0.326972	2.05691	1.89443	2.26781	0.664817	0.882522	0.507304	1	0.407554	0.470492	0.429783	2.03804	1.85779	2.32799	0.919256	0.91594	0.684191	1
ACSL1	0.319997	0.328829	0.34693	1.86801	1.74115	2.18142	0.88228	0.986685	0.719911	1	0.431205	0.516321	0.470595	2.43103	1.99675	2.55337	0.801761	1.04873	1.04918	1	0.438697	0.371611	0.470259	2.40293	2.63875	2.63066	0.890571	0.964745	0.611756	1
ACSL3	0.281976	0.280988	0.278667	1.85786	1.70133	2.05363	0.947895	1.02799	0.817608	1	0.284396	0.280979	0.315601	2.02955	1.91233	2.37604	0.735286	0.883964	0.582847	1	0.333148	0.325119	0.357045	2.2142	2.36732	2.55399	1.04696	1.17649	0.775107	1
ACSL4	0.30096	0.310915	0.365482	2.03592	1.9465	2.26933	1.12817	1.11576	0.938107	1	0.281297	0.302261	0.316625	2.22527	2.12145	2.45639	0.613396	0.858898	0.717095	1	0.377556	0.368906	0.328547	2.1608	2.3939	2.55318	0.974908	1.03164	0.611373	1
ACSL5	0.251971	0.289082	0.287559	1.94768	1.67794	2.10985	0.759177	0.811896	0.498216	1	0.356279	0.348493	0.359719	2.21122	1.76929	2.34229	0.731015	1.04007	0.513066	1	0.435076	0.441504	0.42729	2.1326	2.32394	2.64011	0.972866	1.10898	0.62572	1
ACSL6	0.407391	0.319019	0.312189	1.92329	2.08969	2.25179	0.600065	1.08992	0.384432	1	0.552166	0.371459	0.405458	2.32529	2.07383	2.75651	1.01885	0.799812	0.8087	1	0.585494	0.565451	0.594851	1.73765	1.94055	2.15742	1.01072	0.831787	1.30618	1
ACSM3	0.288429	0.273631	0.301495	1.91358	1.66094	2.23394	1.23718	1.34802	1.03117	1	0.408361	0.481669	0.452516	1.95962	1.80426	2.28817	0.788339	1.01336	0.539871	1	0.442234	0.527402	0.534001	1.69759	1.67862	1.82804	0.921949	1.17519	0.775956	1
ACSS1	0.386997	0.349052	0.375174	2.08302	1.97244	1.91228	0.934535	0.908355	0.616394	1	0.426475	0.421198	0.438757	2.35196	2.09859	2.44032	0.737105	1.02346	0.678406	1	0.346532	0.403183	0.408818	1.90019	1.92086	2.01992	0.867421	0.936532	0.622032	1
ACSS2	1.59163	1.56694	1.58733	0.71863	0.655669	0.572502	0.82414	0.924493	0.912405	1	1.34937	1.25831	1.35487	0.54041	0.560777	0.341306	0.436721	0.387646	0.630159	1	1.7578	1.78403	1.76641	0.554933	0.541364	0.344972	0.319551	0.453563	0.374148	1
ACTBL2	1.60829	1.57334	1.85849	1.00485	1.18944	0.954043	1.37513	1.60125	2.09726	1	2.43186	2.17483	2.08022	1.13799	1.1716	1.21322	3.42189	1.98291	1.53324	1	1.29132	1.43968	1.31765	0.725862	0.73603	0.764269	0.706534	0.831423	1.00173	1
ACTL6A	0.564823	0.577409	0.620198	0.868975	0.899107	0.923795	1.94908	2.54506	3.01159	1	0.639024	0.631181	0.651922	0.83127	0.911902	0.947652	2.99069	2.66092	2.41873	1	0.77354	0.736103	0.760411	1.16635	1.16298	1.19341	2.63465	2.33523	2.78976	1
ACTN1	1.37248	1.364	1.38106	0.7711	0.782371	0.75233	0.658284	0.563465	0.605793	1	1.36497	1.3137	1.30893	0.589173	0.681674	0.536017	0.386089	0.393547	0.410185	1	1.72751	1.72648	1.69707	0.663416	0.640162	0.600128	0.435809	0.471526	0.467176	1
ACTN4	1.34558	1.31466	1.3248	1.05929	1.04276	1.07547	0.940161	0.938598	0.979929	1	1.53851	1.52781	1.53265	1.09381	1.18991	1.15293	0.932616	0.928812	1.07163	1	1.54121	1.65336	1.62079	1.00694	0.915953	0.85981	0.73299	0.653002	0.761907	1
ACTR10	1.65917	1.77222	1.76009	0.953811	0.927487	0.829897	0.643861	0.819189	0.841594	1	1.61484	1.78461	1.7229	0.679566	0.679834	0.615807	0.547798	0.566019	0.594013	1	1.62368	1.56211	1.67928	0.689834	0.655755	0.618201	0.644748	0.683575	0.821266	1
ACTR1A	1.52744	1.49569	1.56982	0.911606	0.901887	0.611272	0.563759	0.619434	0.62991	1	1.79324	1.80646	1.73479	0.672079	0.724412	0.571653	1.21558	0.960278	0.811438	1	1.4879	1.34884	1.56838	0.641309	0.581781	0.633822	0.733963	0.882506	0.932245	1
ACTR1B	1.47742	1.66442	1.53007	0.754221	0.705298	0.588649	0.560171	0.749058	0.725119	1	1.50384	1.25635	1.3619	0.787197	0.780298	0.796235	0.79439	0.651934	0.829076	1	1.58965	1.31289	1.51208	1.11611	1.09035	1.04744	0.6766	0.767576	0.771123	1
ACTR2	1.53756	1.54698	1.51321	0.78978	0.787624	0.641298	0.798918	0.844713	1.00197	1	1.61239	1.5712	1.52979	0.687618	0.73947	0.6265	1.10369	0.929962	0.762519	1	1.58684	1.5964	1.56979	0.672644	0.66865	0.619195	0.696297	0.764057	0.94671	1
ACTR3	1.61467	1.63791	1.61191	0.758464	0.73808	0.598256	0.7288	0.762911	0.869621	1	1.73413	1.69379	1.5942	0.646389	0.70374	0.591025	1.10688	0.90514	0.904658	1	1.69218	1.6717	1.61885	0.686667	0.644299	0.581267	0.731882	0.750902	0.980876	1
ACTR3B	1.23191	1.24449	1.17964	0.711612	0.867929	0.577256	0.940136	0.826844	0.819856	1	1.13229	1.14362	1.0949	0.746477	0.755685	0.748707	1.2155	1.17534	0.965401	1	1.67666	1.66381	1.6447	0.850252	0.872693	0.880735	1.0217	1.15525	1.49936	1
ACTR5	0.719081	0.754301	0.768629	0.583915	0.656448	0.631342	1.57582	2.80689	2.83097	1	0.760484	0.783057	0.764015	0.63553	0.652505	0.650129	3.20072	2.90574	2.97863	1	0.839023	0.911264	0.945771	0.689896	0.711222	0.711637	2.85041	2.50773	3.95461	1
ACTR6	0.684632	0.656412	0.68641	0.809886	0.883201	0.754959	2.58083	2.44391	3.38444	1	0.563523	0.653515	0.547875	0.441039	0.538979	0.466136	5.1397	4.50076	3.98265	1	0.734897	0.587749	0.652723	0.643884	0.812416	0.719489	2.84044	2.21374	2.36465	1
ACTR8	0.712583	0.590878	0.703563	0.678544	0.783398	0.87181	3.36815	3.06116	4.11165	1	0.704102	0.51671	0.73705	0.732216	0.705356	0.904226	4.70352	4.0182	3.11908	1	0.758473	0.675338	0.710259	0.794818	0.788287	0.791073	3.68972	2.99208	3.96216	1
ACVR1	0.647052	0.638678	0.676818	2.06798	1.94223	2.26953	0.966897	1.14738	0.751172	1	0.490864	0.488287	0.496818	1.84633	1.43557	1.57853	0.846967	2.86377	0.530097	1	0.602068	0.554434	0.558462	1.70309	1.99708	2.08261	0.75248	0.9372	0.417387	1
ACYP1	1.49131	1.55817	1.48466	0.753874	0.812865	0.681112	1.00051	0.692937	0.860922	1	1.47438	1.53127	1.61562	0.650899	0.638831	0.497747	0.333091	0.515045	0.363052	1	1.94956	1.78408	1.83147	0.617844	0.583619	0.456334	0.380429	0.488709	0.286215	1
ACYP2	1.34188	1.31957	1.35507	1.10745	1.03037	0.961262	0.553183	0.616084	0.54524	1	1.34954	1.42557	1.4738	1.29971	1.2063	1.19712	0.515078	0.579972	0.40851	1	1.36633	1.37219	1.37256	0.98242	0.89641	0.904432	0.475156	0.557999	0.574651	1
ADA	1.56163	1.58775	1.64435	0.79094	0.788538	0.709507	0.569245	0.64642	0.602673	1	1.96167	1.92795	2.03024	0.961292	0.962724	0.803692	0.519678	0.572255	0.575126	1	1.42534	1.40416	1.49375	0.639746	0.597816	0.523658	0.347763	0.44325	0.445951	1
ADAL	1.59434	1.56578	1.54227	0.679592	0.709119	0.608367	0.671866	0.651116	0.82154	1	1.36932	1.28779	1.40419	0.598255	0.58743	0.448288	0.379156	0.424329	0.419178	1	1.6201	1.74282	1.84895	0.59377	0.593085	0.556962	0.644335	0.519035	0.318639	1
ADAM10	0.572764	0.60837	0.538374	1.858	1.71309	1.87153	0.97254	0.996497	0.788526	1	0.59418	0.584258	0.581208	1.88961	1.77892	2.01626	0.827985	0.963858	0.741109	1	0.687285	0.684907	0.650456	1.76529	1.74095	1.8642	0.909729	1.03173	0.718108	1
ADAM17	0.411162	0.388709	0.392243	1.71576	1.54659	1.91997	0.895535	0.915147	0.691485	1	0.457444	0.615693	0.495512	2.32122	2.36061	2.5373	0.843782	1.20196	0.763241	1	0.609408	0.544822	0.624214	1.62097	1.87247	2.22533	1.1631	1.16433	1.21414	1
ADAM8	0.70697	0.657424	0.643268	1.60361	1.6374	1.65833	0.978383	0.902009	1.07083	1	0.565796	0.466219	0.421266	2.43332	2.49554	2.84015	1.17899	1.38942	0.703181	1	0.39289	0.45829	0.33387	2.30403	2.39546	2.52671	0.818407	1.08588	0.94133	1
ADAP1	0.766529	0.772113	0.729192	0.782315	0.796412	0.755229	0.581401	0.979341	1.0137	1	1.43497	1.54196	1.41317	0.998586	1.14274	1.15269	1.17916	1.34309	1.26065	1	1.79725	1.82394	1.54101	1.3007	1.22153	1.20711	1.30139	1.26421	1.50655	1
ADAR	0.339863	0.337091	0.337433	0.827818	0.905556	1.03054	2.90381	3.57747	4.14004	1	0.310297	0.317201	0.32057	0.6655	0.651182	0.7778	4.36068	4.11875	3.93705	1	0.358047	0.359522	0.348399	0.666608	0.807131	0.746219	4.17407	3.44709	4.66732	1
ADARB1	0.339756	0.347935	0.346581	0.936298	0.978518	1.14299	3.16978	3.19662	4.15915	1	0.356789	0.370496	0.366042	0.874982	0.902729	1.07913	4.23837	3.5465	3.98083	1	0.392285	0.397423	0.354229	0.786951	0.975988	0.905774	3.18285	2.48012	3.78311	1
ADAT1	1.00399	0.856652	0.927806	1.02811	1.01141	1.06281	0.816767	0.780262	0.757457	1	1.30322	1.07504	1.10347	1.08835	1.3309	1.25075	1.26814	0.907787	1.16528	1	0.837277	0.950911	0.818611	1.27858	1.31981	1.36947	0.909134	0.921609	1.01436	1
ADCK1	0.28164	0.308132	0.233306	2.86043	2.56414	2.8698	1.05915	1.10234	0.899627	1	0.354814	0.368939	0.383689	1.65396	1.55173	1.7673	1.20299	1.2191	0.978817	1	0.430479	0.397748	0.397392	1.95913	2.07482	2.25751	0.974806	0.937396	0.506674	1
ADCK2	0.360701	0.41504	0.367049	2.29762	2.20075	2.57262	0.988411	1.25072	0.708745	1	0.282359	0.288321	0.372267	1.56369	1.57472	1.88106	1.23837	1.28767	1.25615	1	0.371694	0.379022	0.39961	1.94201	2.05897	2.17401	0.937754	0.981661	0.613849	1
ADCK3	0.338343	0.400847	0.370484	1.75988	1.62394	1.84444	0.787707	0.845765	0.525628	1	0.384021	0.38411	0.382385	1.79247	1.52179	1.88825	0.569499	0.68163	0.633065	1	0.535106	0.519802	0.500051	2.00458	2.19659	2.28052	1.22076	1.21441	1.056	1
ADCK4	0.343712	0.358294	0.379917	1.71476	1.62612	1.8663	0.870697	1.04068	0.77897	1	0.21597	0.224745	0.215347	2.06472	1.95205	2.41821	0.723473	0.958171	0.610552	1	0.490314	0.546388	0.47823	1.90149	2.00234	2.2321	1.47188	1.609	1.29899	1
ADCY7	0.550418	0.541649	0.525644	1.71621	1.5877	1.83072	1.3152	1.25484	1.17728	1	0.477531	0.434048	0.445507	1.42314	1.2657	1.58793	1.04304	1.20865	0.74024	1	0.796579	0.819858	0.767395	1.57499	1.74539	1.81466	1.26373	1.34434	1.24624	1
ADD1	0.634856	0.610171	0.672513	0.649516	0.631719	0.678349	2.75571	3.16696	3.75981	1	0.560614	0.638239	0.672146	0.600111	0.672666	0.676896	3.16502	3.16787	3.13352	1	0.612711	0.675222	0.796373	0.736213	0.828217	0.747428	3.64628	2.65674	3.47754	1
ADD2	0.477814	0.515978	0.568588	0.627113	0.606514	0.647808	2.39472	3.65743	4.50797	1	0.276083	0.245136	0.322781	0.375321	0.368805	0.3505	1.88676	1.74627	1.99243	1	0.8736	0.840803	1.00286	0.781908	0.820076	0.799024	4.05105	3.00851	3.4018	1
ADD3	0.545423	0.561039	0.599076	0.66304	0.70724	0.68624	3.1325	3.19223	3.94432	1	0.529226	0.577654	0.67184	0.587886	0.578159	0.585968	3.21865	3.20957	3.45962	1	0.651675	0.683489	0.814552	0.735622	0.808259	0.729943	3.75401	3.12495	4.15152	1
ADGRE5	0.41843	0.407215	0.39273	1.55158	1.66526	1.82816	0.943052	0.957993	0.780941	1	0.468718	0.47984	0.480485	2.01751	1.8875	2.19391	1.02532	1.05827	0.765397	1	0.464991	0.519528	0.519233	1.9689	2.09995	2.29975	1.23802	1.14526	0.956237	1
ADGRG1	0.611177	0.562132	0.497507	1.47395	1.70521	2.10141	0.956634	1.12441	1.71951	1	0.66416	0.479822	0.610029	1.2024	1.14523	1.37572	1.34032	1.02794	2.23417	1	0.838482	0.76056	0.734308	2.52534	2.657	2.78168	1.44258	1.77919	0.720172	1
ADH5	1.61978	1.65317	1.60364	0.621927	0.642296	0.478802	0.604134	0.555709	0.630437	1	1.62561	1.66207	1.57227	0.569676	0.626234	0.47666	0.537453	0.444547	0.585067	1	1.90288	1.94618	1.87664	0.605011	0.526617	0.416236	0.456773	0.472659	0.518438	1
ADI1	1.70712	1.55436	1.792	0.795002	0.641715	0.916033	0.418578	0.476007	0.386674	1	1.4622	1.46482	1.47563	0.596153	0.69184	0.485623	0.273846	0.352673	0.263197	1	1.30516	1.45683	1.65823	1.02062	1.12328	0.979704	0.654664	0.709913	0.442399	1
ADK	1.6586	1.65056	1.67547	0.583831	0.579086	0.462253	0.41633	0.452549	0.531316	1	1.74174	1.71213	1.80037	0.596932	0.644396	0.47763	0.382005	0.513969	0.39729	1	1.8357	1.85046	1.84423	0.545914	0.457184	0.368018	0.343648	0.45492	0.371112	1
ADNP	0.28189	0.283223	0.364915	0.929952	0.934315	1.04812	2.92459	2.68956	3.06147	1	0.300887	0.261302	0.268363	0.981922	0.96838	1.15287	3.76036	3.29787	3.23446	1	0.357615	0.368579	0.391543	1.31024	1.42209	1.40952	3.18404	2.68937	4.01555	1
ADNP2	0.240163	0.146433	0.262363	0.361962	0.486377	0.538175	4.09692	4.53032	5.50704	1	0.236682	0.285779	0.253794	0.673609	0.637957	0.695205	5.92563	5.2934	8.80393	1	0.289277	0.18776	0.351326	1.17921	1.11315	1.24453	2.85312	2.43386	4.1811	1
ADO	1.14191	1.16348	1.23506	1.13731	1.03212	1.08759	0.859034	0.944162	1.06126	1	1.44955	1.4945	1.37889	1.06321	1.08167	1.01654	0.733951	0.698521	1.37971	1	1.04798	1.11303	1.05289	0.899791	0.947646	0.954619	0.974661	1.00421	0.88468	1
ADPGK	0.31498	0.313481	0.349305	1.91747	1.50203	1.96344	1.20676	1.12981	1.30089	1	0.284892	0.241683	0.339524	2.01944	1.89622	2.32074	0.871759	0.95623	0.733243	1	0.39465	0.387852	0.378149	2.15659	2.48454	2.53116	1.04423	1.03356	0.936584	1
ADPRHL2	1.32561	1.25596	1.30358	0.966902	0.974897	0.92533	0.661975	0.724701	0.665317	1	1.30833	1.31166	1.3728	0.999362	1.09793	1.0614	0.731125	0.716604	0.601861	1	1.41049	1.46423	1.44635	1.02214	0.896323	0.899276	0.710554	0.646405	0.652287	1
ADPRM	1.42338	1.59325	1.51752	0.774624	0.856147	0.736821	0.905681	0.918115	1.08074	1	1.15188	1.24281	1.15869	0.479643	0.665481	0.552151	2.18871	1.53487	1.79015	1	1.13452	1.12896	1.23989	0.593157	0.729196	0.677927	1.47929	1.32409	2.46806	1
ADRM1	1.33727	1.31713	1.38689	0.857502	0.856081	0.854117	0.682568	0.720274	0.677002	1	1.25689	1.33789	1.40706	0.798895	0.843154	0.773125	0.546077	0.67371	0.762947	1	1.46443	1.58121	1.51601	0.917792	0.859287	0.768889	0.697744	0.777386	0.80505	1
ADSL	1.92705	1.92169	1.98032	0.736268	0.725169	0.65081	0.425848	0.475588	0.58168	1	2.04475	1.98971	1.9503	0.748146	0.762808	0.589123	0.480775	0.511698	0.603576	1	1.63456	1.67117	1.67934	0.679991	0.634605	0.539291	0.3635	0.433305	0.383537	1
ADSS	1.70654	1.62034	1.69677	0.547769	0.557219	0.427118	0.550488	0.553612	0.605961	1	1.72814	1.68295	1.81215	0.712827	0.683796	0.462102	0.535075	0.497641	0.52235	1	1.72755	1.70664	1.78713	0.582985	0.500594	0.40214	0.479669	0.502296	0.494095	1
AES	1.23871	1.30027	1.20509	0.921666	0.983504	0.891418	0.864547	0.603323	1.50095	1	1.39496	1.48717	1.32397	1.13505	1.05651	1.04404	0.627837	0.760888	0.872649	1	1.20806	1.10456	1.23543	1.10845	1.18006	1.28408	1.12524	1.14622	1.57635	1
AFF1	0.430752	0.448366	0.403035	1.15993	1.26332	1.30446	2.66748	2.72045	3.60852	1	0.335064	0.337518	0.364755	1.26719	1.1728	1.2497	3.20777	3.07853	2.42966	1	0.508831	0.504177	0.507885	1.27033	1.291	1.28215	2.63639	2.16008	3.38962	1
AFF4	0.251846	0.319579	0.305163	1.01284	1.01555	1.28662	2.85022	3.23389	3.80932	1	0.255588	0.218029	0.259822	1.12239	1.04122	1.17094	3.91316	3.41531	3.01598	1	0.231088	0.291463	0.249904	1.32551	1.43227	1.35886	2.87708	2.4176	4.38378	1
AFG3L2	0.329441	0.325635	0.329695	1.97874	1.85169	2.15821	0.939521	1.04254	0.734361	1	0.264687	0.2627	0.271836	2.15008	1.85811	2.35581	0.748032	0.917392	0.537141	1	0.384345	0.379706	0.380398	2.03119	2.19756	2.43297	1.0774	1.03652	0.676062	1
AFM	0.900238	0.919418	0.904481	1.4128	1.47262	1.43101	3.47568	1.73507	2.10595	1	1.16013	1.03979	1.05575	1.17929	1.32822	1.05789	2.09639	1.7121	2.13364	1	0.949976	0.83127	0.945306	1.38785	1.2938	1.16659	1.80802	1.701	2.01723	1
AFTPH	1.40506	1.44907	1.38665	0.911637	0.866906	0.879549	0.521319	0.537838	0.559564	1	1.35902	1.38185	1.54148	0.874394	0.90754	0.805152	0.647564	0.711291	0.688993	1	1.68611	1.73585	1.72258	0.8407	0.81253	0.69106	0.362506	0.480632	0.280502	1
AGA	1.07418	1.08991	0.997409	0.656442	0.719001	0.602875	0.566327	0.435599	0.401453	1	1.28882	1.48064	1.18581	0.944362	0.906735	1.06682	0.299736	0.325023	0.185158	1	1.88798	1.94921	1.90271	1.23129	1.11148	1.17221	0.790668	0.723181	0.82089	1
AGAP2	1.41067	1.42829	1.47683	0.866853	0.821879	0.780542	0.655375	0.786773	0.916445	1	1.6581	1.65415	1.70386	0.850394	0.81461	0.700192	0.717008	0.804572	0.801795	1	1.47161	1.48273	1.60304	0.809263	0.789221	0.670053	0.815326	0.789264	0.759474	1
AGAP3	0.967341	0.87164	0.864771	0.622531	0.704643	0.68944	0.674873	0.944911	1.17685	1	1.22359	1.19817	1.1639	0.906295	0.874067	0.803866	0.9757	1.10307	1.22885	1	1.09578	0.909532	1.23949	0.707214	0.8803	0.774351	1.2223	1.46352	1.93106	1
AGFG1	1.30715	1.42605	1.41262	1.03342	1.01086	1.02994	0.745651	0.696489	0.766191	1	1.40353	1.3675	1.46604	0.980725	0.888714	0.844886	0.654336	0.73146	0.709156	1	1.53961	1.4432	1.57919	1.0308	0.9613	0.828579	0.596302	0.541112	0.490669	1
AGFG2	1.3461	1.39484	1.30089	0.784576	0.676842	0.785234	0.691441	0.634254	0.682038	1	1.58531	1.73206	1.68822	1.00522	0.891807	0.825026	0.459642	0.570378	0.573632	1	1.68527	1.67587	1.58256	0.850355	0.92798	0.868865	0.409951	0.596914	0.530376	1
AGGF1	0.665253	0.629011	0.665896	1.12915	1.14929	1.18967	1.23978	1.41186	1.61456	1	0.605597	0.541068	0.577882	1.46119	1.48358	1.70928	1.65233	1.48238	1.19922	1	0.514514	0.595325	0.774067	1.60359	1.64211	1.88658	1.26455	1.34244	0.979831	1
AGK	0.363775	0.382033	0.351314	1.92887	1.85496	2.23002	0.952906	0.946007	0.715116	1	0.372051	0.406319	0.38761	2.14511	1.82422	2.35411	0.837348	1.03906	0.951202	1	0.432518	0.416003	0.404058	2.09476	2.33619	2.5127	1.11604	1.16756	0.666549	1
AGL	1.56789	1.65518	1.47431	0.536927	0.517941	0.430025	0.443924	0.37342	0.516857	1	1.75536	1.78304	1.73588	0.563151	0.60186	0.464497	0.40154	0.49342	0.502627	1	1.9692	2.08255	1.95292	0.553159	0.397717	0.285467	0.24463	0.329674	0.342205	1
AGMAT	0.399768	0.418447	0.446326	1.87843	1.83024	1.74863	0.942423	0.88655	0.691094	1	0.156727	0.181318	0.168676	2.27548	2.00534	2.17552	0.548977	0.681168	0.41624	1	0.361432	0.358062	0.373771	2.30716	2.13787	2.41177	0.766455	0.799094	0.533797	1
AGO1	1.08374	1.11076	1.07671	1.09566	1.16401	1.22643	0.90608	1.00138	0.999266	1	0.99383	0.94651	0.922472	1.22909	1.19316	1.29374	1.02738	1.12913	1.01414	1	1.13698	1.12094	1.1767	1.26602	1.22013	1.25356	1.07649	1.00849	1.021	1
AGO2	1.11546	1.12867	1.1176	1.20311	1.26085	1.35144	0.867693	0.967998	1.04521	1	1.0595	1.02503	1.04931	1.19225	1.16024	1.29203	0.968569	1.08445	0.926331	1	1.19165	1.28121	1.25019	1.17447	1.08071	1.15786	0.940014	0.809061	0.824938	1
AGO3	0.946163	0.875134	0.905235	1.23138	1.24768	1.34728	0.907048	1.02321	0.904837	1	0.900984	0.936065	0.895592	1.15256	1.20228	1.2167	1.14429	1.13455	1.15963	1	1.11562	1.00221	1.07708	1.38883	1.26537	1.38631	1.2737	1.17891	1.26439	1
AGO4	0.981366	0.938204	0.929366	1.25508	1.26413	1.34536	0.982891	1.09662	1.18405	1	1.15611	1.16151	1.16896	1.3541	1.32298	1.51484	1.42644	1.48287	1.9354	1	1.18578	1.16399	1.06492	1.09072	1.03043	1.08963	0.877188	0.813759	0.955046	1
AGPAT3	0.20861	0.241758	0.248745	1.94483	1.91968	2.28953	0.945761	0.871967	0.631871	1	0.196386	0.218899	0.234362	2.11918	2.05086	2.55956	0.62011	0.816263	0.486632	1	0.378017	0.345298	0.386794	2.30037	2.39036	2.75425	0.968922	1.06665	0.74988	1
AGPAT5	0.195885	0.266859	0.218087	1.96819	1.86484	2.20373	1.15341	1.00402	0.867166	1	0.323132	0.269959	0.30497	2.35386	2.20519	2.44328	0.772188	0.943391	0.544289	1	0.231333	0.244127	0.231318	2.22972	2.48161	2.59183	1.19604	1.03786	0.752006	1
AGPS	0.316806	0.351405	0.390887	2.12879	2.03368	2.29871	1.10002	1.07574	0.763371	1	0.297583	0.304171	0.285548	2.22986	1.8719	2.39961	0.704391	0.979227	0.770535	1	0.385346	0.397478	0.39951	1.89704	2.0327	2.26723	0.941946	1.10581	0.783907	1
AGT	0.785406	0.921916	1.17897	1.30442	1.04755	0.988041	3.79471	3.43025	2.86963	1	1.13785	1.21421	1.30868	0.990778	1.09646	0.871357	1.99028	1.50177	2.75876	1	1.36689	1.1851	1.30463	1.0213	0.908017	0.776739	2.13507	1.87921	3.37325	1
AGTPBP1	1.34051	1.43789	1.38749	0.808313	0.842909	0.768616	1.03118	1.00102	1.27298	1	1.26101	1.22429	1.30622	0.909995	0.843183	0.744107	1.13781	1.09298	1.08703	1	1.21191	1.29399	1.21488	0.699382	0.848939	0.763859	1.26106	1.03682	1.30437	1
AHCTF1	0.261134	0.261193	0.322667	0.303857	0.367703	0.341248	4.39668	3.4307	4.89434	1	0.310712	0.343103	0.31925	0.435383	0.489231	0.449699	4.99723	4.22497	4.59846	1	0.380993	0.372756	0.346115	0.415049	0.517437	0.400898	6.48322	5.945	9.95418	1
AHCY	1.58479	1.58582	1.59802	0.92218	0.979062	0.849877	0.680352	0.710342	0.65893	1	1.37501	1.33294	1.38047	0.775612	0.850168	0.77818	0.50377	0.504168	0.593506	1	1.39143	1.38806	1.46558	0.725944	0.691092	0.687382	0.699098	0.698582	0.693124	1
AHCYL1	1.6015	1.49277	1.5927	1.13429	1.02538	0.948088	0.535753	0.560353	0.506764	1	1.2713	1.31212	1.29246	1.03306	0.972511	0.916724	0.57037	0.741187	0.582506	1	1.30932	1.40981	1.30618	1.00302	0.97599	0.92088	0.618104	0.775917	0.83284	1
AHCYL2	1.451	1.46206	1.52347	0.862531	0.924867	0.828097	0.841935	0.838742	1.1313	1	1.42466	1.32446	1.44108	0.883379	1.00889	0.937196	0.619736	0.619586	0.545887	1	1.40018	1.32872	1.3709	0.928008	0.89483	0.980855	0.566422	0.620719	0.500805	1
AHNAK	1.09771	1.03714	1.07592	1.46372	1.42553	1.53683	0.824157	0.871543	0.740709	1	1.24882	1.34639	1.32824	1.90697	1.73557	1.82373	0.742804	0.845631	0.787457	1	0.926339	0.948703	0.972529	1.42659	1.50212	1.42547	0.685264	0.705431	0.50126	1
AHSA1	1.60819	1.67894	1.72571	0.596848	0.571067	0.471265	0.422044	0.482836	0.446111	1	1.6703	1.68187	1.71736	0.536469	0.556466	0.432629	0.424866	0.443258	0.458944	1	1.64483	1.71293	1.70318	0.667379	0.590317	0.531897	0.576258	0.605795	0.69457	1
AHSG	0.918896	0.959717	0.947406	1.37991	1.36722	1.3676	4.43353	2.31609	2.59245	1	0.970572	1.16979	0.990132	1.19811	1.43859	1.15593	2.32725	2.0022	2.32703	1	1.16311	1.12961	1.06704	1.35803	1.28389	1.34035	2.50573	2.55746	3.13692	1
AIDA	1.60297	1.43686	1.48216	0.793193	0.909252	0.728709	0.467124	0.745621	0.684183	1	1.63961	1.6245	1.75754	0.930076	1.04118	0.952641	0.436197	0.597517	0.521341	1	1.44317	1.44154	1.39506	0.873197	0.792984	0.775885	0.672416	0.615539	0.556447	1
AIFM1	0.266445	0.29715	0.29466	2.21664	2.09913	2.3594	1.00538	0.970266	0.609478	1	0.210226	0.216699	0.219318	2.37991	2.07985	2.61764	0.662972	0.849231	0.529133	1	0.255627	0.265733	0.27259	2.20319	2.28614	2.62547	0.939912	0.97736	0.490949	1
AIM1	0.935774	0.886978	0.912397	1.25983	1.17969	1.1917	1.9675	2.26109	2.89075	1	1.07002	1.03305	1.08064	1.25329	1.28619	1.2985	2.33946	2.34185	2.31948	1	0.881006	0.866104	0.949229	0.916987	0.866741	0.831623	1.68599	1.51953	2.08143	1
AIMP1	1.69653	1.62708	1.63806	0.737723	0.757014	0.703033	0.407796	0.530428	0.44725	1	1.56977	1.62991	1.60413	0.761554	0.770186	0.665053	0.515694	0.598311	0.600487	1	1.60785	1.59444	1.57986	0.802156	0.740494	0.689242	0.521617	0.628023	0.562696	1
AIMP2	1.71421	1.6596	1.7402	0.752604	0.818004	0.722066	0.935858	1.04069	1.24245	1	1.58846	1.66173	1.6592	0.723357	0.749346	0.658151	0.524028	0.577206	0.576528	1	1.51707	1.47774	1.55315	0.738234	0.715405	0.658973	0.665575	0.704358	0.715995	1
AIP	1.49376	1.49068	1.52425	0.894185	0.877182	0.840164	0.7203	0.67745	0.689718	1	1.59014	1.61326	1.67786	0.796764	0.834039	0.716599	0.522726	0.525979	0.632625	1	1.51689	1.56713	1.55101	0.753813	0.693643	0.659903	0.575409	0.659245	0.647594	1
AK2	0.430582	0.442346	0.461571	2.1805	2.19347	2.02115	1.00727	0.917617	0.761541	1	0.372231	0.359782	0.366264	2.37921	2.24435	2.50942	0.752548	0.85861	0.55751	1	0.403273	0.393211	0.392051	1.96355	2.06123	2.28548	0.869991	0.924645	0.629229	1
AK3	0.388892	0.373626	0.412982	2.02939	1.96553	2.02292	0.993753	0.939662	0.647417	1	0.314559	0.316851	0.353181	2.08551	1.78919	2.15316	0.682109	0.819872	0.589284	1	0.431593	0.436273	0.405968	2.11923	2.04576	2.39959	0.966585	1.01733	0.653909	1
AK6	1.46854	1.67465	1.61834	0.760533	0.818948	0.668789	0.956834	0.965888	1.08217	1	1.34851	1.36666	1.56193	0.821231	0.649782	0.686823	0.776134	0.553322	0.421262	1	1.12283	0.954835	2.24206	0.470176	0.553956	0.426973	0.664294	0.805702	0.670657	1
AKAP1	0.469462	0.461566	0.464473	1.79299	1.67159	1.97585	0.863573	0.796722	0.592379	1	0.407429	0.416598	0.406791	1.8625	1.57476	2.09813	0.68608	1.00948	0.812082	1	0.365026	0.398966	0.434759	2.13926	2.34188	2.47121	1.01142	0.973701	0.703945	1
AKAP10	1.06993	1.10857	1.12859	1.00072	0.906368	0.780728	0.849853	0.765583	1.06219	1	1.45813	1.55051	1.4586	0.7306	0.931601	0.78591	0.880677	0.969655	1.40315	1	1.25446	1.32703	1.39914	0.728427	0.66004	0.705342	1.33868	1.05533	1.32426	1
AKAP11	1.09765	1.04645	1.11816	1.16997	1.18254	1.24351	0.70824	0.810798	0.730243	1	1.00298	1.01119	1.00106	1.05403	1.13239	1.1277	0.407109	0.5156	0.430484	1	1.13958	1.2164	1.25989	1.25092	1.24666	1.17666	0.819423	0.770533	0.591283	1
AKAP13	1.66269	1.58041	1.62592	0.801526	0.763782	0.747913	0.597041	0.661352	0.699499	1	1.51719	1.58164	1.57712	0.88277	0.846735	0.779914	0.759087	0.770405	0.817996	1	1.36222	1.38481	1.39167	0.814166	0.831069	0.672492	0.820363	0.797668	0.901532	1
AKAP17A	0.398646	0.393132	0.316436	0.809577	0.88677	0.965549	2.93738	3.36249	3.93054	1	0.325648	0.371727	0.3217	0.813222	0.774019	0.932957	3.59646	3.12395	3.01693	1	0.401427	0.352029	0.32879	1.08579	1.20377	1.09254	3.33422	2.80624	4.50562	1
AKAP7	0.786549	0.70801	0.76207	1.35897	1.35043	1.41559	0.879982	0.887732	0.987521	1	0.560416	0.50925	0.503776	1.00156	1.12116	1.07225	0.763359	0.741331	0.715271	1	1.1526	1.06465	1.18313	1.19642	1.19484	1.34809	1.48814	1.19411	1.51099	1
AKAP8	0.371054	0.35786	0.429982	1.20867	1.22411	1.39409	2.02669	2.6291	2.66833	1	0.417439	0.43894	0.422328	0.979994	0.981542	1.169	3.39354	3.0837	2.77233	1	0.384127	0.439992	0.358623	1.12825	1.26669	1.19553	3.18609	2.52408	3.13699	1
AKAP8L	0.632595	0.520216	0.59844	1.12141	1.16736	1.34663	1.53796	1.63063	1.84457	1	0.583659	0.489171	0.545764	1.16686	1.10557	1.20964	1.97686	1.68256	1.38462	1	0.671142	0.742779	0.713385	1.46994	1.57246	1.59087	1.54873	1.35858	1.53121	1
AKAP9	1.33873	1.32501	1.36298	0.965762	0.977912	0.946299	0.881485	0.809616	0.742957	1	1.32267	1.35941	1.37039	0.934692	0.969944	0.864917	0.707421	0.882602	0.780699	1	1.28596	1.26889	1.32331	0.841133	0.851018	0.784713	0.786505	0.926566	0.661029	1
AKNA	0.906762	0.833072	0.95801	0.898975	1.01593	1.12118	1.09651	1.21422	1.10621	1	0.811984	0.822073	0.94515	0.997144	1.1289	1.27105	1.59408	2.15261	1.28782	1	0.834505	0.865952	0.779089	1.17877	1.21937	1.16202	2.1885	2.11176	1.97727	1
AKR1A1	1.51769	1.5809	1.56253	0.775317	0.791749	0.677703	0.570934	0.581325	0.590152	1	1.54611	1.60301	1.53792	0.684686	0.732702	0.600145	0.558516	0.523721	0.835162	1	1.5762	1.63831	1.60735	0.679131	0.643682	0.598732	0.686194	0.729305	0.831736	1
AKR1B1	1.51273	1.61825	1.59296	0.707593	0.723344	0.592901	0.609122	0.538489	0.598708	1	1.41871	1.43782	1.49523	0.585986	0.612295	0.467262	0.477752	0.457252	0.450402	1	1.85121	1.95069	1.9131	0.673651	0.557409	0.490266	0.495908	0.557793	0.565825	1
AKR1C3	1.27523	1.1187	1.26777	0.777914	0.506087	0.499287	0.404583	0.252268	0.411335	1	1.40163	1.40398	1.3509	0.607127	0.657989	0.44465	0.242915	0.44101	1.62248	1	2.21789	2.21812	2.44159	0.67901	0.635466	0.439748	0.4478	0.41696	0.532128	1
AKR7A2	1.2839	1.42479	1.4197	0.944233	1.0099	0.861945	0.555119	0.508524	0.421015	1	1.40633	1.43048	1.41736	0.920298	0.861711	0.824961	0.467075	0.52191	0.451814	1	1.58874	1.58186	1.50897	0.868064	0.804901	0.861725	0.628539	0.6837	0.570922	1
AKT1	1.35234	1.25411	1.39998	0.688225	0.698636	0.648967	0.676486	0.590994	0.644051	1	1.64175	1.78963	1.63462	0.580836	0.660517	0.62383	0.405335	0.38705	0.502657	1	1.87856	1.81957	2.14354	0.620334	0.551554	0.464495	0.427465	0.491779	0.601909	1
AKT1S1	0.838839	0.836319	0.818567	1.40595	1.36312	1.30233	1.09692	1.06151	1.17133	1	1.45366	1.21497	1.40909	1.03972	1.12106	0.937432	0.755212	0.881923	0.734818	1	1.14067	1.22916	1.19661	1.02938	0.964483	1.06666	0.600738	0.597721	0.519105	1
AKT2	1.63726	1.53864	1.5527	0.671102	0.676881	0.596129	0.55194	0.459858	0.552344	1	1.57187	1.58672	1.587	0.738935	0.675595	0.656186	0.551144	0.551519	0.510229	1	1.72092	1.68592	1.67417	0.71918	0.669902	0.588326	0.528029	0.717277	0.563928	1
AKT3	1.83919	2.023	1.92706	0.617474	0.664717	0.484566	0.36155	0.424964	0.344478	1	1.64113	1.7351	1.78502	0.674727	0.806269	0.631969	0.548238	0.524994	0.423248	1	1.58888	1.65342	1.65063	0.585629	0.438444	0.429342	0.270953	0.246732	0.274062	1
AKTIP	1.70838	1.56193	1.81097	0.735358	0.621865	0.600378	0.566396	0.789112	1.57628	1	1.18064	1.10891	1.17084	0.72785	0.743277	0.651908	1.1809	1.17427	1.20249	1	1.66721	1.81362	1.72779	0.737886	0.668191	0.576396	0.907923	0.773452	1.27136	1
ALAD	1.36001	1.3663	1.4716	0.688257	0.69896	0.691598	0.687953	0.784635	1.05661	1	1.26023	1.28556	1.34624	0.728351	0.738798	0.615853	0.646026	0.493897	0.607412	1	1.35315	1.39832	1.48712	0.87988	0.864369	0.819129	0.794145	0.988294	0.859741	1
ALAS1	0.899651	0.27349	0.466247	2.01831	2.03347	2.38895	0.868357	0.83354	1.33667	1	0.143967	0.0957405	0.106914	2.01602	1.88668	2.48055	2.95846	1.4033	3.89961	1	0.503769	0.460934	0.289923	1.26212	1.34097	1.67042	1.20011	1.78237	2.20231	1
ALB	0.4769	0.488008	0.554854	1.79571	1.65433	1.52975	0.787164	0.687373	0.525012	1	0.421263	0.5546	0.495089	1.47279	1.43863	1.83856	0.589631	0.6807	0.623171	1	0.623263	1.04739	0.847762	1.76307	1.74381	1.72715	0.717352	0.785778	0.610617	1
ALCAM	0.363137	0.418792	0.408957	1.94925	2.07558	1.93092	1.18192	1.13384	1.01255	1	0.601099	0.584211	0.588915	2.22845	2.20798	2.42781	1.29617	1.38514	1.25818	1	0.523312	0.49919	0.505474	1.53844	1.6614	1.72011	1.23513	1.27475	0.893737	1
ALDH16A1	1.47645	1.4089	1.51329	0.624296	0.644714	0.58244	0.658285	0.65394	0.80443	1	1.47434	1.49574	1.4825	0.645607	0.706481	0.568122	0.619063	0.68911	0.556935	1	1.45921	1.4565	1.46694	0.679244	0.713078	0.647821	0.770126	0.802471	0.923625	1
ALDH18A1	0.316075	0.340057	0.344438	1.98038	1.81219	2.15655	0.881167	0.982883	0.660347	1	0.352896	0.338615	0.341422	1.81591	1.62286	1.97785	0.651789	0.823437	0.567035	1	0.475668	0.481176	0.50437	2.23345	2.38541	2.57751	1.04885	1.12264	0.705549	1
ALDH1B1	0.359859	0.368425	0.407398	1.90203	1.98546	1.81426	0.995521	0.952312	0.74533	1	0.337331	0.381508	0.372716	2.73824	2.50577	2.77383	0.91914	1.20278	0.708908	1	0.391986	0.423641	0.311489	1.87139	1.83693	2.08317	1.21667	1.04667	0.81222	1
ALDH2	0.464714	0.504278	0.490512	1.39896	1.58425	1.5056	0.83743	0.853086	0.90971	1	0.354799	0.428565	0.363819	3.03119	3.18129	3.25147	1.05404	1.4944	1.6577	1	0.367703	0.438916	0.370448	1.35326	1.55202	1.60723	1.01407	1.05696	0.67565	1
ALDH3A2	0.284923	0.279199	0.291428	1.79754	1.66113	1.95031	1.15393	1.00032	0.883321	1	0.188804	0.213919	0.166572	1.94097	1.696	2.07137	0.929329	1.03419	0.931676	1	0.485233	0.508751	0.452941	1.89076	2.11282	2.18257	1.19204	1.36831	1.20745	1
ALDH4A1	0.214902	0.307323	0.272962	1.91237	2.02564	1.93017	0.921508	0.806157	0.488051	1	0.327034	0.33211	0.356211	1.95267	1.95048	2.14966	0.756546	0.885428	0.77994	1	0.362476	0.470473	0.418225	1.91207	2.21286	2.35942	0.968486	1.05799	0.663053	1
ALDH5A1	0.386999	0.391192	0.359236	1.91631	1.84599	1.80661	0.901231	0.874209	0.687587	1	0.347276	0.354747	0.342974	2.27643	1.81561	2.29195	0.630927	0.768312	0.480154	1	0.243565	0.262982	0.279916	2.05037	2.06772	2.36151	0.795126	0.87642	0.417398	1
ALDH6A1	0.329748	0.353004	0.344414	2.25429	2.27469	2.08841	1.11556	1.10541	0.814973	1	0.339211	0.327457	0.369385	2.2845	2.16146	2.35327	0.705717	0.859019	0.60909	1	0.380529	0.35419	0.386951	1.86656	1.73565	2.08627	0.810435	0.920502	0.670599	1
ALDH7A1	0.76058	0.776382	0.768831	1.96045	1.86478	1.70589	0.938769	0.786434	0.585683	1	0.406675	0.402531	0.437993	0.854838	0.975811	0.990051	0.449873	0.412637	1.40253	1	0.763093	0.747394	0.706145	1.2875	1.42887	1.50888	0.888131	0.880655	0.687421	1
ALDH9A1	0.903491	0.92534	0.911522	1.63554	1.66938	1.51034	0.889895	0.841658	0.735444	1	0.893626	0.908331	0.881361	1.71238	1.62938	1.81121	0.75176	0.765275	0.680168	1	0.928856	0.987622	0.934567	1.49777	1.43466	1.57771	0.687113	0.756181	0.543479	1
ALDOA	1.70054	1.68875	1.71999	0.764273	0.784375	0.648033	0.572657	0.585347	0.629835	1	1.67665	1.64143	1.71537	0.704304	0.757786	0.591928	0.519722	0.47158	0.558671	1	1.77697	1.80365	1.82331	0.693372	0.604477	0.543019	0.439614	0.430673	0.479023	1
ALDOC	1.45101	1.42636	1.51235	0.670076	0.657276	0.576613	0.548877	0.544155	0.560248	1	1.61192	1.55426	1.60902	0.639296	0.687722	0.543627	0.460254	0.425093	0.491201	1	1.97677	1.94536	1.97462	0.771342	0.695049	0.624739	0.548067	0.526394	0.598054	1
ALG1	0.511484	0.27185	0.361466	2.22568	2.0186	2.18149	1.05421	0.964407	0.829861	1	0.311506	0.204189	0.275342	2.47741	2.19858	2.45826	0.850216	1.07807	0.925537	1	0.491532	0.463681	0.313472	2.12529	2.25349	2.17811	1.16941	1.09335	1.15213	1
ALG11	0.206298	0.256946	0.319537	1.8536	1.64222	2.44906	0.633613	0.939064	0.213728	1	0.164661	0.205921	0.175962	2.45291	2.05275	2.55595	0.48966	0.915232	0.368359	1	0.174432	0.216545	0.202095	2.27062	2.75132	2.59311	0.726344	1.02058	0.423574	1
ALG13	0.756501	0.721604	0.680736	1.9368	1.99756	2.10956	0.81556	0.934213	0.553675	1	0.810847	0.923735	0.8567	1.65297	1.54585	1.59446	0.894697	0.968367	3.97681	1	0.785277	0.752986	0.775539	1.35849	1.39129	1.41678	1.80887	1.40718	2.16252	1
ALG14	0.387096	0.388375	0.370198	2.16502	2.02295	2.35703	0.916959	1.05305	0.689286	1	0.578317	0.529886	0.587981	1.73745	1.75274	2.02921	0.718557	0.892983	0.588049	1	0.422951	0.447176	0.615183	1.699	1.67657	2.07453	1.15578	1.01572	1.19521	1
ALG2	0.411815	0.443088	0.480867	2.17825	1.89722	2.25876	0.843307	1.2601	0.697592	1	0.298921	0.325296	0.27663	2.35118	2.21467	2.77524	0.715426	1.13417	0.720979	1	0.337824	0.324075	0.352707	2.08444	2.26869	2.41879	0.846944	0.916896	0.520842	1
ALG5	0.266859	0.259482	0.228192	2.00196	1.90432	2.3953	0.834838	0.838187	0.533625	1	0.220386	0.236728	0.199999	2.28179	2.24736	2.67544	0.542616	0.794896	0.476476	1	0.311363	0.355138	0.325401	2.19047	2.55367	2.69102	0.927339	0.944547	0.339323	1
ALG6	0.206033	0.226335	0.229966	1.92701	2.06281	2.19206	1.18524	1.03211	0.825547	1	0.154823	0.158731	0.157735	1.71714	1.3507	1.93057	0.842098	1.04797	0.741477	1	0.271294	0.265519	0.188701	1.98838	2.07692	2.12721	1.04721	1.16196	1.0624	1
ALG8	0.547718	0.419562	0.45812	1.52084	1.45094	1.64307	1.54805	0.984521	1.48639	1	0.443111	0.51209	0.521071	2.40562	1.8253	2.40579	0.804384	1.21829	0.876267	1	0.474743	0.38469	0.564069	1.69085	1.58768	2.0415	1.28982	1.20791	0.989792	1
ALKBH1	1.51793	1.50188	1.18096	2.77505	2.19157	2.5312	1.20719	0.869225	1.04099	1	1.0853	1.08887	0.904591	1.0745	1.12406	1.71988	1.20913	1.14361	0.96343	1	1.17176	1.01447	1.32819	1.36589	1.66626	1.34626	1.11047	1.15062	1.06416	1
ALKBH3	1.16835	1.0895	1.09576	0.74674	0.874086	0.863361	0.946025	0.88445	1.19627	1	1.17826	1.3243	1.13135	0.729364	0.759509	0.674903	0.533188	0.556206	0.479497	1	1.20512	1.43074	1.41722	0.994827	1.11011	1.1342	0.932876	1.04096	0.903777	1
ALKBH4	1.04724	1.03679	1.06144	0.919865	1.01551	0.851775	0.559709	0.704902	0.781622	1	1.37184	1.31766	1.30812	0.711758	0.828314	0.648954	0.458347	0.548188	0.593211	1	1.56269	1.52121	1.54953	0.743996	0.718155	0.570377	0.626617	0.657686	0.571447	1
ALKBH5	0.695341	0.693887	0.70369	1.13633	1.19713	1.23864	1.57738	2.14253	2.79917	1	0.738376	0.690541	0.706169	1.22517	1.06816	1.2402	2.18354	2.29496	1.85406	1	0.871597	0.839119	1.03908	1.34076	1.27988	1.23762	2.12349	1.84545	2.41179	1
ALKBH8	1.20063	1.23832	1.0684	1.01423	0.707181	0.813199	0.770753	0.573273	0.904907	1	1.59239	1.42286	1.77647	1.02894	1.02072	0.831871	0.79505	0.721668	0.758565	1	1.16064	1.31026	1.30603	1.01114	0.997361	0.940625	1.20344	0.881301	0.990494	1
ALOX5	2.9276	2.73872	2.8158	1.3184	1.15525	1.22876	0.998509	0.836201	0.95582	1	1.0262	1.03642	0.948154	0.687833	0.641869	0.641372	0.258104	0.394275	0.264947	1	0.770218	0.823719	0.793503	0.62726	0.726507	0.743958	0.447913	0.495393	0.252442	1
ALOX5AP	0.429779	0.414614	0.400154	1.91609	1.74334	2.06614	1.2084	1.29857	1.13801	1	0.525245	0.469292	0.492379	2.51057	1.93641	2.49521	0.801775	1.06198	0.804597	1	0.46974	0.44886	0.523066	1.81222	1.53316	1.75308	0.838592	0.846728	0.752328	1
ALYREF	0.470217	0.42138	0.434782	1.11956	1.2196	1.20322	2.48014	3.27774	3.97692	1	0.386809	0.382376	0.367333	0.994719	0.999989	1.10192	4.07508	3.60938	3.66389	1	0.311197	0.313383	0.327504	0.999759	1.02502	1.05218	4.1516	3.21975	3.92052	1
AMBP	0.939678	1.37003	0.87888	1.31452	1.41677	1.20951	3.46242	1.65006	2.09137	1	1.37522	1.44961	0.876927	1.54603	1.52096	1.15039	2.55347	2.43459	2.24745	1	1.34368	1.31986	0.917576	1.5547	1.35533	1.28593	2.59491	2.52829	3.25301	1
AMDHD2	1.71531	1.73033	2.00622	0.79	0.772799	0.657408	0.431047	0.536955	0.600217	1	1.79381	1.72718	1.91689	0.641519	0.670347	0.493643	0.668303	0.554621	0.781763	1	1.90019	1.48494	1.61849	0.995159	0.874281	0.914341	1.01326	0.777966	0.550332	1
AMFR	0.465597	0.529508	0.498125	1.9507	1.88733	2.12759	1.14169	1.18907	1.07789	1	0.266027	0.212871	0.249005	1.81047	1.90571	2.08615	0.98094	1.02733	1.06346	1	0.365883	0.440095	0.428892	1.66157	1.76013	1.8991	1.08683	1.08153	0.701681	1
AMIGO1	0.590784	0.576703	0.678043	1.75974	1.77329	1.94519	1.29144	1.40546	1.62401	1	0.823734	0.740768	0.752632	1.63417	1.5064	1.63976	0.868407	0.924027	1.13386	1	0.887909	0.832915	0.980179	1.98406	2.05723	2.10072	1.47967	1.11864	0.783224	1
AMPD2	1.49841	1.47535	1.4594	0.840996	0.802122	0.784677	0.818799	0.768109	0.856685	1	1.55748	1.55095	1.53272	0.906164	0.917347	0.855465	0.79631	0.817549	0.775878	1	1.33124	1.37865	1.36639	0.812997	0.821782	0.763617	0.736629	0.697148	0.798268	1
AMPD3	1.29956	1.3803	1.52073	0.687048	0.690267	0.541752	0.573429	0.599421	0.640003	1	1.46337	1.52856	1.53564	0.752526	0.72474	0.643812	0.830548	0.73215	0.672706	1	1.45749	1.58357	1.62808	0.877227	0.796578	0.74294	0.707858	0.776605	0.7726	1
ANAPC1	0.945685	0.911383	0.957439	0.763578	0.597727	0.692011	1.91446	2.04186	2.671	1	1.00268	1.05583	1.06195	0.684293	0.621041	0.668119	2.75599	2.36092	2.52368	1	1.00631	1.09778	1.05827	0.687744	0.734	0.673458	2.25182	2.00504	3.00724	1
ANAPC10	0.936018	0.97521	0.940773	0.855279	0.910724	1.08779	1.82617	2.21454	2.90951	1	0.905416	0.897674	0.884234	0.768071	0.865985	0.768428	2.9089	2.36776	2.43661	1	0.733464	0.854169	0.914069	0.818205	0.909647	0.881637	2.00102	1.74247	2.18953	1
ANAPC2	1.10299	1.04976	1.05542	0.772962	0.749044	0.725296	1.32674	1.41958	1.67008	1	1.44639	1.38229	1.37835	1.08996	1.04623	0.955946	2.36073	2.22018	2.19281	1	0.818773	0.794034	1.0693	1.00982	0.948126	1.06742	1.37788	1.46432	1.80761	1
ANAPC4	1.54562	1.2028	1.40874	0.77646	0.818644	0.642622	2.99986	1.77736	2.86697	1	1.04283	1.17504	1.13608	0.829821	0.787919	0.805302	2.42813	2.12178	2.59051	1	1.09888	0.905819	0.864772	0.831356	0.920668	0.832925	3.05871	2.71575	4.07198	1
ANAPC5	0.925615	1.00692	0.858866	0.782465	0.807852	0.790683	2.42506	1.94138	2.56521	1	1.01414	1.04193	1.09514	0.686206	0.676532	0.668171	2.2887	2.28895	2.34986	1	1.0377	0.911455	0.987643	0.792733	0.70285	0.77745	2.02401	1.99052	3.11971	1
ANAPC7	0.72949	0.827607	0.887002	0.838673	0.792715	0.807033	2.35497	2.59311	3.22083	1	0.781169	0.878034	0.814942	0.892602	0.896065	1.04712	2.94474	2.85878	2.78377	1	0.733971	0.847878	0.758748	0.937434	0.842458	0.87851	2.096	1.95936	3.11541	1
ANGEL2	0.495028	0.522339	0.466462	1.39977	1.58373	1.47863	1.59321	1.37556	1.74922	1	0.742051	0.639056	0.645847	1.44721	1.43142	1.71656	2.40574	2.31584	2.26168	1	0.577356	0.616045	0.585294	1.37161	1.50354	1.38909	1.76071	1.57749	2.13925	1
ANK1	1.83762	1.85716	1.78907	0.714531	0.676425	0.564602	0.54419	0.677503	0.455899	1	2.16189	2.0741	2.14729	0.839013	0.892901	0.77531	0.634995	0.674234	0.471139	1	1.48948	1.54029	1.74021	0.65815	0.61308	0.46858	0.511171	0.497244	0.506007	1
ANK3	0.928036	0.902188	0.972484	1.15475	1.19262	1.1579	0.888126	0.885417	0.921797	1	1.0401	1.09501	1.11675	1.29082	1.12059	1.21324	0.944397	0.992379	0.977201	1	1.0305	1.1649	1.16227	1.20761	1.12714	1.05952	0.716633	0.680169	0.623041	1
ANKFY1	1.50587	1.51414	1.4986	0.788413	0.802586	0.750996	0.608121	0.720965	0.68962	1	1.47509	1.51877	1.47173	0.776654	0.734727	0.728087	0.603788	0.684581	0.588138	1	1.63181	1.78551	1.75381	0.794105	0.72647	0.601293	0.539765	0.585759	0.516675	1
ANKH	0.168435	0.118008	0.238668	2.18666	2.20843	2.41372	1.0021	0.932299	0.424321	1	0.24784	0.245038	0.264837	2.10732	1.87148	2.34181	1.17624	1.33688	0.926206	1	0.216475	0.250091	0.261784	2.35691	2.51807	2.33152	1.97449	1.49124	1.23692	1
ANKHD1	0.801102	0.811314	0.812207	1.31505	1.19566	1.46616	0.582982	0.781832	0.769605	1	1.20216	1.36887	1.28522	1.23921	1.23478	1.17196	0.46835	0.646097	0.819051	1	1.25343	1.19083	1.52158	1.0975	1.21145	1.12085	0.757538	0.670002	0.603786	1
ANKIB1	0.977293	1.03285	0.965458	1.0463	1.05401	1.09694	0.660465	0.80038	0.664033	1	0.884237	0.999833	1.00037	1.24142	1.17918	1.1514	0.856868	0.957286	0.746776	1	1.28698	1.25894	1.42702	1.62578	1.6083	1.5189	0.973972	1.13681	0.97701	1
ANKLE2	0.696371	0.645714	0.677424	1.66581	1.58332	1.55394	0.971482	1.00125	0.966634	1	0.446725	0.480504	0.476476	1.89094	1.84861	2.20924	0.866458	1.02732	0.758106	1	0.568209	0.504244	0.564624	1.66768	1.90745	2.04516	1.01792	1.04477	0.885484	1
ANKMY2	1.59498	1.555	1.55172	0.615173	0.65677	0.53655	0.412905	0.50565	0.461863	1	1.46628	1.32108	1.67775	0.897668	1.09155	0.765421	0.755242	0.717794	0.858318	1	1.61778	1.75645	1.65749	0.726266	0.727017	0.555711	0.615672	0.505311	0.519052	1
ANKRD11	0.376338	0.358442	0.435287	0.586152	0.604557	0.754604	2.94298	3.5666	4.34291	1	0.452429	0.446982	0.512542	0.774613	0.762335	0.752922	3.88475	3.29385	3.26247	1	0.477916	0.582182	0.495673	0.885949	1.10504	1.03024	3.79732	3.31778	4.48123	1
ANKRD12	0.313834	0.318261	0.316164	0.481287	0.544385	0.578906	3.14199	4.47439	5.37825	1	0.358712	0.316787	0.338235	0.627683	0.606926	0.626558	4.95159	4.44263	4.13044	1	0.272179	0.364479	0.32368	0.890568	0.971077	1.00959	4.75836	3.60828	4.95417	1
ANKRD13A	1.32091	1.40136	1.47336	1.05186	1.02184	1.00653	0.786807	0.788505	0.763348	1	1.2821	1.31592	1.41243	1.07774	0.98891	0.927216	0.669716	0.816128	0.664671	1	1.27852	1.29293	1.32981	0.970254	0.881434	0.8236	0.621629	0.709867	0.715714	1
ANKRD13D	1.40144	1.40309	1.55326	0.921923	1.18003	0.984508	0.932691	1.00423	1.13202	1	1.7764	1.62725	1.71907	0.916607	1.01966	0.868123	0.94043	1.05335	0.797942	1	1.40235	1.43283	1.62346	0.75104	0.858514	0.742917	0.660192	0.791483	0.934661	1
ANKRD17	1.27237	1.22734	1.28426	1.15225	1.14392	1.186	0.668859	0.680803	0.542361	1	0.972239	1.12255	1.24594	1.01943	0.989628	0.975214	0.822817	0.769119	0.65363	1	1.06989	1.03935	1.12346	0.96178	1.10281	1.0958	0.703934	0.766391	0.494007	1
ANKRD27	0.995761	1.00551	0.968017	1.22862	1.21526	1.25905	0.770888	0.797878	0.630243	1	0.954649	0.984813	1.00532	1.16996	1.18915	1.2699	0.895833	0.776934	0.987994	1	1.02126	1.05166	1.18427	1.2857	1.33342	1.13911	0.993556	0.885061	0.47109	1
ANKRD28	1.58644	1.60093	1.65199	0.705698	0.653883	0.609592	0.460018	0.484154	0.470093	1	1.28888	1.2348	1.36121	0.790503	0.811294	0.802023	0.770033	0.911241	1.0358	1	1.4293	1.46342	1.50169	0.881145	1.05202	0.852589	0.749963	0.742847	0.912208	1
ANKRD49	0.599066	0.617377	0.639921	1.44765	1.40005	1.60696	1.71553	1.59964	2.0066	1	0.847614	0.94344	0.929809	1.27599	1.26645	1.47288	0.974424	1.02603	0.676624	1	1.51937	1.52739	1.54188	0.844101	0.87978	0.833273	0.630419	0.623608	0.693609	1
ANKRD54	1.22264	1.49267	1.24184	0.911973	0.831473	0.75841	0.345611	0.531299	0.478883	1	1.68478	1.66297	1.57529	1.02427	0.870648	0.829374	0.377079	0.511959	0.722747	1	1.4739	1.65349	1.62755	0.815783	0.877969	0.826533	0.609225	0.635597	0.4328	1
ANKS1A	1.34534	1.35561	1.36351	0.736789	0.738719	0.814856	0.673103	0.719592	0.775284	1	1.42315	1.45169	1.44917	0.727713	0.894311	0.662054	0.542225	0.642101	0.555778	1	1.55759	1.50943	1.44417	0.697046	0.690535	0.657121	0.384738	0.538137	0.365571	1
ANKZF1	1.46025	1.39726	1.41245	0.765361	0.796501	0.754325	0.695363	0.77321	0.945422	1	1.3084	1.42296	1.35282	0.965829	1.0413	1.11482	0.979564	0.989858	1.30793	1	1.38634	1.3528	1.3638	0.845384	0.863399	0.879412	0.977863	0.905219	1.18193	1
ANO10	0.432784	0.364953	0.394831	2.30616	2.25332	2.66429	1.04344	1.21808	0.992871	1	0.240074	0.231882	0.240353	1.43793	1.3245	1.64711	0.713327	0.746188	0.639013	1	0.331719	0.476344	0.270381	1.87981	2.38052	2.60527	0.951403	0.98784	0.681042	1
ANO6	0.454988	0.425783	0.455495	1.9984	1.73016	1.9956	0.87091	0.94746	0.718105	1	0.385111	0.389222	0.430743	2.07959	1.87918	2.30859	0.719303	1.00667	0.692049	1	0.470232	0.475529	0.502327	1.93204	1.92185	2.29323	0.947564	0.937185	0.727807	1
ANO8	0.148753	0.272882	0.162563	2.55778	2.5955	2.1619	1.07904	2.4522	1.19583	1	0.860718	1.10647	1.02727	0.709871	0.883206	1.01313	2.55563	2.6455	2.04603	1	0.377334	0.407774	0.333626	2.13036	2.66985	2.43554	1.11432	0.9232	0.51622	1
ANO9	0.929713	1.19735	0.953534	1.84216	1.14073	1.20219	0.943242	1.19899	0.854299	1	0.768278	0.750091	0.636826	2.00583	1.81501	2.13824	1.06182	1.34987	0.622784	1	0.719435	0.837859	0.675695	1.33652	1.57663	1.41975	0.850767	0.931323	0.768289	1
ANP32A	1.33227	1.34833	1.32665	0.945412	0.996702	0.931385	0.663612	0.715927	0.6366	1	1.45755	1.45425	1.40708	0.985134	1.12592	1.12423	0.437073	0.535746	0.416369	1	1.50991	1.52123	1.5179	1.00648	0.908013	0.992796	0.456242	0.582575	0.457632	1
ANP32B	1.27446	1.27231	1.21633	1.11406	1.20462	1.10548	0.666774	0.634705	0.513541	1	1.22907	1.22497	1.19277	1.16462	1.38702	1.35641	0.54087	0.674449	0.57176	1	1.28427	1.28063	1.24987	1.19039	1.16693	1.27987	0.635325	0.69036	0.558819	1
ANP32E	1.16759	1.17238	1.15127	1.07788	1.17644	1.11935	0.434461	0.541497	0.353481	1	1.36115	1.36507	1.33345	1.15506	1.34885	1.28488	0.563497	0.620155	0.483834	1	1.26582	1.22593	1.30966	1.24635	1.17324	1.2594	0.570353	0.609249	0.522814	1
ANTXR2	0.658775	0.572129	0.60988	1.90342	1.73768	2.00997	1.04386	1.14073	0.930485	1	0.453384	0.461152	0.454396	2.10058	2.00855	2.41353	1.1857	1.27714	0.964723	1	0.604161	0.546857	0.549593	1.79853	1.75185	1.96321	0.989356	0.959168	0.871384	1
ANXA1	1.92313	1.91384	1.93013	0.729541	0.722315	0.592087	0.529029	0.525907	0.567855	1	2.17316	2.22478	2.14244	0.727977	0.77011	0.545043	0.427742	0.396398	0.623775	1	1.82946	1.85749	1.85548	0.600087	0.512649	0.438585	0.38387	0.407047	0.432019	1
ANXA11	1.38838	1.39738	1.43452	0.801031	0.791974	0.742901	0.562477	0.57458	0.600308	1	1.42402	1.50302	1.5143	0.902601	0.932587	0.836845	0.519178	0.498213	0.548332	1	1.43586	1.44015	1.56251	0.854623	0.804075	0.76114	0.566994	0.603549	0.603028	1
ANXA2	1.54834	1.52969	1.59021	1.08693	1.09714	0.977713	0.703203	0.728411	0.699227	1	1.62206	1.59184	1.6941	1.24047	1.2171	1.12016	0.650059	0.712113	0.712365	1	1.5345	1.54797	1.60652	0.975196	0.842963	0.803052	0.615608	0.633858	0.598366	1
ANXA3	1.57196	1.52414	1.43369	0.573882	0.506786	0.356319	0.301295	0.256413	0.318125	1	1.3327	1.21466	1.26991	0.766123	0.780729	0.744638	0.96242	0.79144	1.90345	1	1.9285	2.149	2.06763	0.666483	0.578337	0.529176	0.747729	0.580101	0.540845	1
ANXA4	1.65323	1.67929	1.74681	0.640777	0.611602	0.465596	0.318564	0.34217	0.326141	1	1.70295	1.80936	1.82731	0.755522	0.822267	0.624226	0.457929	0.453878	0.470234	1	1.92443	1.79609	1.93037	0.821746	0.739241	0.651898	0.514386	0.552395	0.581598	1
ANXA5	1.5725	1.58853	1.53832	0.655061	0.650377	0.525388	0.455998	0.491991	0.497241	1	1.8121	1.84369	1.84643	0.728527	0.788857	0.624688	0.489532	0.467187	0.545043	1	1.81957	1.84998	1.82635	0.703875	0.606071	0.545023	0.468302	0.513569	0.53641	1
ANXA6	1.59676	1.65183	1.62124	0.676487	0.675546	0.533763	0.461598	0.440677	0.479874	1	1.74029	1.76588	1.75322	0.716616	0.737662	0.575125	0.419731	0.414387	0.464309	1	1.92019	1.91978	2.01155	0.693209	0.587546	0.50276	0.40361	0.43752	0.43723	1
ANXA7	1.43203	1.4553	1.45469	0.678019	0.640213	0.556054	0.545567	0.595784	0.632918	1	1.55255	1.59654	1.57893	0.733614	0.788399	0.670713	0.534282	0.551396	0.564813	1	1.67464	1.62887	1.82333	0.729751	0.637492	0.590972	0.531602	0.566236	0.709643	1
AP1AR	0.62802	0.600276	0.641602	1.66889	1.57387	1.84254	1.04827	0.914952	1.07693	1	0.520097	0.434386	0.403922	1.7692	1.45104	1.8551	0.501616	0.855852	0.467505	1	1.02074	1.04382	1.00772	1.45984	1.57142	1.77025	1.21827	1.21208	1.31625	1
AP1B1	1.33458	1.35741	1.37599	1.06048	1.04494	0.981325	0.768288	0.841647	0.850134	1	1.53046	1.58965	1.58896	1.11938	1.07198	1.01492	0.549933	0.603807	0.60469	1	1.33406	1.26315	1.51617	0.962827	1.05449	0.902891	0.655797	0.669346	0.656373	1
AP1G1	1.25536	1.29581	1.35154	1.0964	1.03726	1.06124	0.931803	0.831229	0.869076	1	1.4335	1.41475	1.47249	1.13259	1.05187	0.98312	0.662282	0.750787	0.684564	1	1.27439	1.3529	1.33511	1.10244	1.14663	1.07017	0.804293	0.78833	0.789746	1
AP1G2	1.61575	1.58974	1.55336	0.886859	0.932617	0.950828	0.527692	0.564721	0.387444	1	1.34955	1.43005	1.407	0.826334	0.804639	0.711025	0.67578	0.636941	0.761603	1	1.4626	1.39543	1.41063	0.871773	0.867509	0.751546	0.666206	0.720191	0.793362	1
AP1M1	1.21324	1.29553	1.33004	0.993719	0.990212	0.983431	0.650106	0.729103	0.73501	1	1.34407	1.34941	1.42031	1.09064	1.02118	1.0188	0.643384	0.753981	0.680255	1	1.37706	1.39618	1.5385	1.19825	1.06814	1.02676	0.739723	0.685557	0.749234	1
AP1S1	1.02184	1.15778	1.09982	1.26745	1.18938	1.20399	0.460556	0.593161	0.548888	1	1.2253	1.18374	1.05082	0.997552	1.1264	1.16045	0.510998	0.521756	0.54627	1	1.35032	1.4133	1.26779	1.26847	1.42745	1.33749	0.731679	0.708622	0.626362	1
AP1S2	1.28461	1.21849	1.1462	1.1915	1.16243	1.21282	1.12456	0.951794	1.09123	1	1.20647	1.32973	1.14569	1.11206	1.02764	1.06916	1.0164	0.962544	0.995352	1	0.973712	0.934575	0.990279	1.0216	0.977784	0.957772	1.70442	1.59867	2.20472	1
AP2A1	1.08954	1.02856	1.06227	1.1854	1.15093	1.25634	1.0053	1.05677	1.14363	1	1.16748	1.25126	1.21656	1.2225	1.1628	1.24092	1.21463	1.17506	1.47445	1	1.02761	1.04185	1.06602	1.23231	1.31466	1.20987	1.31415	1.24308	1.46879	1
AP2A2	0.931655	0.893262	0.948744	1.33105	1.24163	1.37072	1.04496	1.15067	1.1709	1	0.992622	1.0634	1.01519	1.23179	1.07655	1.1644	0.985105	1.04062	0.965508	1	0.994821	1.01277	1.05907	1.27569	1.31993	1.3165	1.03115	0.99477	1.15005	1
AP2B1	1.063	1.0541	1.04374	1.2788	1.2225	1.31774	1.09918	1.20915	1.34098	1	1.15399	1.19438	1.27516	1.38051	1.22261	1.26131	1.35043	1.36491	1.40289	1	0.937873	0.908853	1.02167	1.29474	1.28196	1.3176	1.24399	1.18205	1.25062	1
AP2M1	0.987808	1.00038	1.01014	1.21682	1.15974	1.24545	1.1555	1.04687	1.23527	1	0.974286	1.07882	1.08207	1.16728	1.13253	1.15876	1.08103	1.04239	1.03545	1	1.02495	1.07577	1.07742	1.21792	1.20759	1.28205	1.12073	1.22779	1.38619	1
AP2S1	1.02104	1.12126	1.16588	1.06381	0.945015	1.0396	1.08329	1.02194	1.06152	1	1.20194	1.37795	1.16661	1.22329	1.01717	1.05776	1.20589	0.964742	1.27797	1	1.08395	1.14944	1.10444	1.2865	1.39975	1.41314	1.23728	1.12874	1.08327	1
AP3B1	1.37	1.29767	1.33551	0.971516	0.962185	0.972118	0.82931	0.820269	0.840109	1	1.34271	1.4253	1.41242	1.1764	1.01417	1.00436	0.788385	0.953769	0.824032	1	1.2828	1.33522	1.29842	1.05455	1.01895	0.965248	0.703218	0.790679	0.84814	1
AP3D1	1.27784	1.2613	1.28157	0.96503	0.894843	0.968864	0.674348	0.671205	0.71525	1	1.26652	1.40422	1.37249	1.03975	0.994264	0.97354	0.677788	0.715649	0.635086	1	1.23069	1.27714	1.30797	1.07175	1.12481	1.02155	0.816223	0.72996	0.801091	1
AP3M1	1.49855	1.45363	1.62985	0.944652	0.965896	0.922267	0.510482	0.875124	0.863467	1	1.50577	1.45279	1.53903	1.19253	0.991643	0.962981	1.02809	1.00487	0.945769	1	1.40415	1.54504	1.51774	0.918776	1.03653	0.823872	0.940597	0.819103	1.0523	1
AP3M2	1.3469	1.2003	1.3278	1.08198	1.11338	1.07371	0.688261	1.25809	0.740081	1	1.36305	1.57996	1.68238	0.825064	0.907577	0.867134	0.461715	0.498835	0.328682	1	1.72379	1.97493	2.36537	1.00216	0.989105	0.716645	0.706448	0.678498	0.246072	1
AP3S1	1.16121	1.23505	1.22009	1.00756	1.00232	1.05007	0.787845	0.817053	0.843915	1	1.21947	1.26993	1.35349	0.998424	0.98241	0.867454	0.97098	0.836496	1.09432	1	0.94782	1.08982	1.00349	1.16339	1.20006	1.31638	0.920653	1.16478	1.13828	1
AP4B1	1.64917	1.661	1.52972	0.880269	0.873727	0.879365	0.743584	0.895271	0.785423	1	1.34949	1.4604	1.36807	1.03746	1.07803	1.01267	0.409517	0.556094	0.488556	1	1.32001	1.56322	1.30677	0.733971	0.746478	0.659134	0.720979	0.823037	0.840533	1
AP4E1	1.62255	1.68292	1.46747	1.09771	0.990612	1.0436	0.798539	0.854916	0.665656	1	1.41516	1.51237	1.47867	0.979091	0.922197	0.949431	0.535933	0.644607	0.334712	1	1.25217	1.3061	1.26922	0.896808	0.918713	0.825704	0.43378	0.723798	0.431937	1
AP4M1	1.25892	1.17346	1.27634	0.979511	0.94474	1.03208	0.547131	0.592367	0.498476	1	1.16039	1.14888	1.14376	0.881824	0.886243	0.80447	1.50927	1.16432	1.27661	1	1.02968	0.90947	1.13083	0.913396	1.01684	0.980795	2.49473	1.92305	3.37673	1
AP4S1	1.27747	1.26703	1.22388	0.703214	0.718791	0.575664	0.673301	0.580463	0.644931	1	1.93528	1.77451	1.76407	0.827326	0.779015	0.667014	0.670013	0.364306	1.18301	1	1.67228	1.67814	1.73046	0.775268	0.742356	0.671126	0.579664	0.665058	0.646559	1
AP5B1	1.51366	1.57979	1.56361	0.748014	0.725105	0.709545	0.312649	0.491068	0.258035	1	1.52344	1.52454	1.45745	1.01627	0.928469	0.809051	0.55618	0.743719	1.04602	1	1.67302	1.56562	1.74581	0.786849	0.579393	0.488286	0.309191	0.572437	0.765753	1
AP5M1	1.4802	1.54539	1.37939	0.839305	0.799741	0.803832	0.445541	0.3922	0.416218	1	1.60973	1.58461	1.54608	0.855022	0.681202	0.769481	0.625191	0.803367	0.663949	1	1.68548	1.74228	1.86317	0.760761	0.82843	0.593772	0.525356	0.682792	0.666136	1
AP5S1	0.945075	1.10351	1.02515	0.662168	0.713101	0.714459	1.90346	0.897569	0.65472	1	1.19144	0.982572	1.15702	0.637848	0.704568	0.687712	0.29459	0.232967	0.310573	1	1.35206	1.36467	1.34673	0.668381	0.797219	1.00837	0.981972	0.758459	0.974377	1
AP5Z1	1.42117	1.39605	1.44125	0.916139	0.875068	0.894425	0.690016	0.86873	0.899271	1	1.3315	1.2857	1.32773	0.971173	1.01315	0.901403	0.81575	0.854399	0.924977	1	1.3907	1.42321	1.346	0.867893	0.866092	0.752384	0.567735	0.439831	0.433702	1
APAF1	1.60388	1.54197	1.54752	0.725036	0.686233	0.55997	0.459574	0.480985	0.604517	1	1.70062	1.70444	1.66476	0.727454	0.802789	0.650068	0.434295	0.526868	0.403355	1	1.67669	1.62895	1.68414	0.741095	0.706945	0.589236	0.442927	0.56325	0.453146	1
APBA2	1.1538	1.04451	1.06474	0.768478	0.721319	0.804487	0.789714	0.524299	0.752043	1	0.919188	1.00147	0.939357	1.05916	0.944731	1.02674	1.59092	1.01489	1.26515	1	1.22744	1.33955	1.3375	1.061	1.35506	1.46388	0.733408	0.855606	0.694996	1
APBB1	1.23809	1.38175	1.34881	0.697219	0.712146	0.794335	0.884489	0.771667	1.51363	1	1.21884	1.27055	1.29045	0.76494	0.747409	0.6553	0.488239	0.37295	0.304209	1	1.80924	1.58755	1.62458	0.868073	0.743712	0.708284	0.476776	0.482027	0.476911	1
APBB1IP	1.47128	1.4732	1.47964	0.719185	0.677894	0.63706	0.609787	0.625931	0.611771	1	1.76955	1.74203	1.66552	0.817622	0.733494	0.644501	0.500044	0.488529	0.488051	1	1.62743	1.69914	1.62785	0.719526	0.668199	0.588165	0.619137	0.591536	0.623606	1
APC	0.88423	0.929189	0.741472	1.02428	0.974155	1.04054	1.46594	1.00094	1.92351	1	0.696993	0.817998	1.4529	1.07888	0.984357	0.833762	1.27697	1.17562	1.27879	1	0.633412	0.648898	0.668769	1.51579	1.78975	1.70123	0.940307	0.895326	1.02448	1
APCS	0.845945	0.965953	0.762422	1.50826	1.54188	1.22454	4.29408	1.6552	2.63279	1	0.933982	1.0799	0.868688	1.38739	1.14085	0.900707	2.04149	1.68553	2.10317	1	0.975181	0.834577	0.708682	1.18426	0.639026	0.897443	1.23388	4.03753	3.74402	1
APEH	1.68258	1.64495	1.76823	0.724527	0.726199	0.623833	0.774269	0.771054	0.848737	1	1.57928	1.66572	1.63563	0.676593	0.705815	0.555255	0.656222	0.575584	0.813726	1	1.63312	1.6444	1.66612	0.587601	0.540011	0.483409	0.585506	0.619673	0.746758	1
APEX1	1.03179	1.03878	1.03828	1.38225	1.4286	1.31089	1.04909	1.00225	1.19397	1	0.894912	0.859512	0.898722	1.4444	1.38664	1.44953	1.00868	1.09879	0.880169	1	0.899122	0.911941	0.938219	1.32645	1.26518	1.38801	0.892931	0.960596	0.809276	1
API5	0.708457	0.705087	0.698596	1.03754	1.01457	1.15026	2.24971	2.34763	3.12777	1	0.710743	0.682683	0.709052	1.13377	1.1401	1.26338	2.89368	2.71005	2.53923	1	0.637925	0.66182	0.637042	1.20362	1.26885	1.33227	2.06793	1.75468	2.57588	1
APIP	1.51493	1.48878	1.47603	0.735238	0.743861	0.681772	0.495136	0.555992	0.440859	1	1.60451	1.61002	1.58415	0.864671	0.930945	0.895631	0.624999	0.609927	0.63909	1	1.48835	1.56437	1.47534	0.764321	0.708857	0.734908	0.482066	0.59277	0.486928	1
APLP2	0.263557	0.218652	0.233241	0.976432	1.16099	1.13261	0.709876	1.57795	1.56538	1	0.260419	0.301185	0.24527	1.66972	1.67931	1.92962	0.748803	0.999629	1.8199	1	0.34945	0.472181	0.306264	2.18966	2.29745	2.32065	1.01663	1.52025	1.02346	1
APMAP	0.318976	0.318051	0.333506	1.92167	1.72454	1.85965	0.908076	0.951045	0.746443	1	0.327653	0.32779	0.345427	2.14722	2.00379	2.23817	0.803491	0.873453	0.674236	1	0.441037	0.437359	0.47025	2.2253	2.21757	2.50152	1.15329	1.23329	1.08067	1
APOA2	0.779328	0.999873	0.830117	1.3913	1.25235	1.2986	1.82194	1.09309	2.47857	1	1.01083	0.840856	0.988891	1.36209	0.951353	1.11355	2.12239	0.744193	4.41335	1	1.46668	0.930723	1.32119	1.55388	0.942721	1.21042	2.32292	0.906932	2.57063	1
APOA4	1.07864	0.910241	0.89083	1.01435	1.23293	1.25174	6.75034	2.39932	2.80637	1	0.995003	1.04549	1.20268	1.01575	1.05872	0.996677	2.61533	2.04814	8.37244	1	1.01086	1.19127	1.0854	1.19294	0.774054	1.06082	2.06385	1.99601	2.36684	1
APOB	1.29053	0.848446	1.56754	0.590913	0.978805	0.496566	6.49336	3.13078	2.94232	1	1.54509	2.14352	1.33879	0.768742	1.03977	0.761818	2.41093	2.17233	2.88773	1	0.481122	0.557391	0.572049	0.518375	1.04849	0.752322	1.77344	2.41529	2.37209	1
APOBEC3C	0.837642	0.859439	0.863032	0.591412	0.636628	0.680066	2.09536	1.7151	2.15009	1	1.11865	1.12771	1.0964	0.788002	0.780156	0.700095	3.08145	3.08232	3.68319	1	0.838548	0.929176	0.910169	0.780087	0.845078	0.746509	2.64058	2.07938	3.8621	1
APOBEC3D	1.10074	1.04449	1.04121	0.952802	0.866092	1.12408	1.5073	1.28734	1.4078	1	1.02389	1.17567	1.03708	1.18754	1.12	1.26076	1.63459	1.68908	1.41631	1	0.713714	1.02031	0.726857	0.903313	0.956958	1.01858	1.42128	1.76381	1.74159	1
APOBEC3F	1.34491	1.43594	1.16824	0.74115	0.739704	0.729472	1.61124	1.56107	1.99903	1	1.27184	1.21677	1.0416	0.814696	0.682611	0.820183	1.7276	1.40074	1.61762	1	1.37945	1.40368	1.47039	0.894688	0.814144	0.760969	1.79224	1.74131	2.12364	1
APOBEC3G	1.16035	1.22767	1.25327	0.832506	0.7449	0.759828	0.700669	0.794666	1.00296	1	1.48326	1.5218	1.66523	0.830469	0.958866	0.898543	0.985058	0.940008	0.892573	1	1.63546	1.66695	1.84519	0.974486	0.899102	0.789079	1.16297	1.14848	1.46085	1
APOBR	0.327823	0.330897	0.326996	1.58634	1.4499	1.6612	0.741283	0.730824	0.66364	1	0.507478	0.526436	0.536684	2.89674	2.59404	3.17277	0.84971	1.08281	0.588263	1	0.491716	0.542797	0.470323	1.72131	1.90814	2.10745	0.801487	0.855779	0.542008	1
APOC1	0.246216	0.346458	0.28999	1.19233	1.11924	1.22725	0.564567	0.521131	0.40814	1	0.80039	1.06739	0.733014	1.59986	1.27685	1.53742	2.28927	1.17606	1.88282	1	0.568459	0.563285	0.585026	2.71121	2.5655	3.37865	1.24863	1.33685	1.02735	1
APOC3	0.491068	2.15263	0.579772	1.81539	3.10537	1.41985	2.15063	0.863369	2.93372	1	0.473317	0.510668	0.561265	1.10295	1.11105	1.19318	1.67993	0.986085	18.2755	1	0.809425	0.688879	0.695897	2.11456	2.23044	2.28227	2.2878	0.837097	1.48494	1
APOD	0.559255	0.541245	0.531854	1.11168	3.50172	1.11419	1.79082	0.789769	0.712927	1	0.300167	0.352127	0.296748	1.98057	1.52502	1.89865	0.587842	0.745497	0.674262	1	0.645994	0.645884	0.696637	2.07957	1.73556	2.59229	0.969941	1.38252	0.720571	1
APOE	0.8815	1.38084	0.906515	1.25659	1.33542	1.01064	1.76856	1.32528	2.05069	1	0.709033	0.69132	0.686162	0.939909	0.970774	0.880979	2.13571	1.19828	2.71383	1	0.772139	0.579075	0.765764	1.01998	0.455185	0.947189	1.00551	2.98111	2.35016	1
APOH	0.759047	0.963954	0.754648	1.4847	1.53617	1.28738	4.27591	2.0887	2.53009	1	1.07136	1.34685	1.01437	1.378	1.16481	1.12285	2.51893	1.76141	2.15135	1	1.07079	1.23599	0.941313	1.5584	1.0793	1.34044	2.17888	1.97441	2.60822	1
APOL2	0.485505	0.478689	0.493771	1.11021	1.12681	1.23196	0.633899	0.649103	0.541263	1	0.644044	0.637902	0.640862	2.14918	1.97414	2.32253	0.766942	1.03378	0.642113	1	0.593375	0.646221	0.836225	2.36772	2.23816	2.52173	0.910461	1.19973	0.615519	1
APOL3	0.813181	0.829655	0.838393	1.704	1.58547	1.72993	0.938603	1.01339	0.999191	1	0.790166	0.905168	0.877638	1.49336	1.44976	1.47329	0.998002	0.858865	0.767938	1	0.679604	0.574372	0.633185	1.45181	1.40428	1.79197	0.685856	0.78547	0.815019	1
APOL6	0.22452	0.245842	0.237257	1.47657	1.40361	1.62027	1.00768	0.66943	0.598568	1	0.348613	0.321638	0.409314	1.72287	1.76707	1.93206	0.938722	0.995149	0.546372	1	0.654443	0.634424	0.672227	2.56739	2.65413	3.03318	1.55593	2.06836	0.976065	1
APOO	0.424499	0.446899	0.41316	1.74277	1.58297	1.94882	0.952601	0.971037	0.749926	1	0.225465	0.26775	0.241347	2.56797	1.73047	2.79633	0.467238	0.775481	0.285697	1	0.446517	0.4438	0.490223	1.75274	2.01619	2.41683	1.0241	0.901499	0.441533	1
APOOL	0.532081	0.476152	0.491892	1.66142	1.60575	1.91059	0.806239	0.870984	0.727104	1	0.547298	0.498826	0.43544	1.80698	1.54826	1.97199	0.857517	0.942464	0.858661	1	0.561244	0.523793	0.570838	2.14556	2.31946	2.54806	1.3173	1.23705	1.02087	1
APP	0.51449	0.486532	0.526788	1.55292	1.36162	1.43883	1.08628	1.02048	0.992771	1	0.537218	0.537687	0.667097	1.27298	1.30782	1.384	0.89961	0.959533	2.8281	1	0.707193	0.62674	0.721643	1.75528	1.54653	1.90799	1.1584	0.511515	0.605097	1
APPL1	1.53235	1.53237	1.58143	0.654569	0.644795	0.522956	0.563571	0.58394	0.595798	1	1.51244	1.47789	1.57709	0.585428	0.661669	0.464615	0.425581	0.410711	0.353577	1	1.66415	1.78456	1.83142	0.687168	0.664303	0.526015	0.562208	0.74901	0.724004	1
APPL2	1.28797	1.33556	1.2025	0.471473	0.52792	0.508246	0.324373	0.498641	0.462859	1	1.14407	1.30415	1.25496	1.08806	0.97743	0.784301	0.677543	0.626282	2.99665	1	1.63198	1.7413	1.83412	0.876571	0.768288	0.642787	0.390409	0.537392	0.474006	1
APRT	1.78915	1.8116	1.82947	0.657662	0.671506	0.580348	0.729846	0.647668	0.719304	1	1.63527	1.76275	1.68709	0.667395	0.706985	0.538741	0.532001	0.534028	0.573495	1	1.68697	1.60558	1.57185	0.677809	0.587229	0.517689	0.579584	0.611882	0.644996	1
APTX	0.584603	0.587905	0.551054	0.981953	1.01548	1.12193	2.4047	2.88481	3.73075	1	0.552986	0.553884	0.602446	1.11714	1.19636	1.14253	3.02765	2.92906	2.59021	1	0.530463	0.596734	0.638529	1.27936	1.37344	1.47375	2.06061	1.84841	2.29876	1
AQP3	0.632345	0.557397	0.555784	1.37089	1.22517	1.54036	2.49144	2.60886	3.44764	1	0.709703	0.524768	0.511261	1.57261	2.05501	2.17347	3.51988	2.57359	2.81044	1	0.679874	0.704849	0.56358	1.45963	1.64254	1.7965	0.899975	0.817775	0.816013	1
AQR	0.416208	0.396547	0.368331	0.96472	0.986152	1.1373	3.36342	2.53463	2.71632	1	0.356601	0.301884	0.327602	1.01903	1.01177	1.08443	3.10465	2.97107	3.18416	1	0.427192	0.434623	0.444772	0.998298	1.15571	1.03998	3.4054	2.96887	4.99516	1
ARAF	1.49283	1.48172	1.49097	0.780219	0.763073	0.669478	0.864377	0.760368	0.671747	1	1.53157	1.63251	1.54498	0.978816	0.954567	0.774003	0.780089	0.729202	0.745033	1	1.6104	1.53855	1.6097	0.770298	0.780234	0.761171	0.978267	0.863451	0.822451	1
ARAP1	1.43254	1.49583	1.53609	0.65522	0.643421	0.619157	0.369835	0.396635	0.403695	1	1.3481	1.46598	1.49529	0.862835	0.780394	0.742835	0.491989	0.62818	0.573771	1	1.62348	1.57484	1.64084	0.831599	0.819236	0.669981	0.55398	0.534145	0.508471	1
ARAP2	0.979173	0.984049	0.947464	0.666522	0.697359	0.66521	0.981238	0.981421	1.21421	1	1.4645	1.5294	1.56347	1.09404	1.07368	1.10354	1.60102	1.43851	1.57625	1	1.32851	1.24778	1.27998	0.913486	1.05342	0.955587	1.11579	1.07896	1.44949	1
ARAP3	1.29642	1.38587	1.52106	0.812133	0.793359	0.698382	1.41384	0.958477	1.35605	1	1.42804	1.59046	1.38649	0.30296	0.529896	0.196467	0.821628	0.665745	0.805759	1	1.59051	0.889893	0.890327	0.631466	1.38309	0.890712	1.01725	1.74175	1.02438	1
ARCN1	1.29129	1.28098	1.33488	1.02063	1.00201	1.0208	0.596	0.657426	0.59599	1	1.35645	1.38962	1.36566	1.08169	1.0077	1.03713	0.683939	0.65095	0.662141	1	1.32471	1.3422	1.3321	1.00571	0.964927	0.934483	0.665558	0.720302	0.677674	1
AREL1	0.259417	0.35563	0.296327	2.19049	2.27966	2.14937	0.980491	0.841705	0.582333	1	0.204346	0.191335	0.363902	2.58137	2.61626	3.16039	0.426264	1.20723	0.43823	1	0.224231	0.305153	0.343267	1.65496	1.83142	1.86407	0.757933	2.36716	0.919819	1
ARF4	1.24186	1.3209	1.22924	0.930538	0.915176	0.964131	0.701165	0.86013	0.950112	1	1.78892	1.81617	1.79446	0.807703	0.920047	0.667601	0.413934	0.566201	0.556337	1	1.36886	1.41119	1.32976	0.948919	0.910637	0.902658	0.694068	0.754164	0.719278	1
ARF5	1.50415	1.50843	1.42517	0.969466	0.912847	0.910755	0.392785	0.457187	0.269373	1	1.4504	1.46526	1.44269	1.05955	1.03674	0.936826	0.360059	0.442846	0.379743	1	1.55079	1.55546	1.49886	1.03144	1.03631	0.93252	0.451377	0.545626	0.368759	1
ARF6	1.65118	1.65902	1.73226	1.44208	1.42693	1.47714	0.720445	0.720041	0.7029	1	1.16365	1.22653	1.10484	1.51452	1.20762	1.26332	0.46437	0.643663	0.538693	1	1.65676	1.47985	1.42814	1.35845	1.30971	1.38234	0.638229	0.794751	0.540741	1
ARFGAP1	0.900787	0.79943	0.870795	1.75262	1.6174	1.60694	0.810093	0.898171	0.736555	1	0.857982	0.853696	0.863548	1.82435	1.63586	1.88802	0.572806	0.677873	0.413093	1	0.804697	0.812751	0.909317	1.59596	1.69215	1.66383	0.709021	0.795953	0.517133	1
ARFGAP2	1.13276	1.15653	1.20285	1.02121	1.05689	1.06158	0.541749	0.671245	0.576679	1	1.12901	1.21763	1.46986	1.33192	1.1251	1.21251	0.607146	0.753091	0.781587	1	1.45844	1.26182	1.39648	1.1004	1.19748	1.01047	0.964172	0.949112	0.932103	1
ARFGAP3	1.08917	1.11498	1.18759	1.31996	1.27125	1.38573	0.647239	0.643322	0.481991	1	1.30482	1.27609	1.36804	1.50104	1.20518	1.31318	0.565472	0.59614	0.606633	1	1.17995	1.26054	1.23996	1.12508	1.20543	1.08459	0.631692	0.658593	0.569106	1
ARFGEF1	1.62892	1.67106	1.70276	0.718184	0.714877	0.660626	0.542061	0.56878	0.532526	1	1.83996	1.84415	1.89356	0.71861	0.706747	0.561905	0.443165	0.495016	0.47209	1	1.74213	1.68483	1.70645	0.71377	0.630908	0.534566	0.509725	0.572193	0.511763	1
ARFGEF2	1.50816	1.48992	1.55415	0.807366	0.806954	0.752815	0.715144	0.600124	0.714472	1	1.44071	1.5302	1.42576	0.782085	0.807551	0.653514	0.548612	0.578606	0.593239	1	1.40948	1.50306	1.50754	0.83764	0.771883	0.67834	0.49036	0.588219	0.533182	1
ARFIP1	1.09359	1.05409	1.13142	1.33742	1.07383	1.09471	0.842707	0.788923	0.750039	1	0.999702	1.09399	1.15634	1.29202	1.10549	0.937941	0.624119	0.571098	0.836727	1	1.17562	1.27076	1.31189	1.66981	1.34697	1.28075	0.774256	0.723456	0.598048	1
ARFIP2	0.905695	0.856301	0.956815	1.23146	1.22106	1.2432	1.2097	1.18374	1.4934	1	0.936334	0.996898	1.01665	1.39279	1.34595	1.33248	0.969612	0.942935	1.02503	1	0.992296	1.04667	1.04674	1.42453	1.44392	1.47697	1.10289	1.228	0.95196	1
ARFRP1	0.399992	0.423855	0.475273	1.90585	1.76649	2.11091	0.858092	1.10135	0.791222	1	0.387452	0.430036	0.407436	1.9271	1.71793	2.12501	0.546079	0.860556	0.481389	1	0.576544	0.553759	0.522535	2.21194	2.59306	2.70362	0.882328	0.941046	0.593497	1
ARG1	0.958815	0.876404	0.738688	1.82809	0.91465	1.02631	3.44362	2.01716	2.43485	1	0.684165	0.67134	1.03298	1.09219	0.830816	0.828237	1.38128	2.3307	4.32896	1	0.764272	0.68459	0.43769	0.845757	0.372974	0.939296	1.62226	1.68144	2.63379	1
ARGLU1	0.371472	0.361938	0.383569	1.29834	1.33175	1.24	1.90759	2.41461	2.94017	1	0.440586	0.398284	0.403057	1.38907	1.30052	1.36172	2.62012	2.29144	2.08849	1	0.442068	0.447409	0.461364	1.56165	1.49526	1.59916	2.13244	1.78166	1.93564	1
ARHGAP1	1.52009	1.62202	1.64112	0.823387	0.749256	0.68072	0.595245	0.706128	0.635211	1	1.77851	1.83204	1.78622	0.71351	0.717667	0.567425	0.523741	0.485485	0.682847	1	1.6151	1.67211	1.65708	0.742249	0.663669	0.61553	0.552413	0.538405	0.608676	1
ARHGAP10	1.15266	1.09798	1.06239	0.954466	0.995074	0.988313	1.19626	1.22851	1.52901	1	0.833246	0.904448	0.867622	1.02817	1.06187	1.10738	1.21036	1.36761	1.54198	1	1.37103	1.42906	1.43922	1.66167	1.65662	1.54547	1.77092	1.63016	1.60951	1
ARHGAP12	1.33492	1.29753	1.38163	0.728326	0.749423	0.75973	0.488845	0.596883	0.56576	1	1.3895	1.44778	1.37455	0.866016	0.785417	0.720546	0.693055	0.752389	0.891808	1	1.38838	1.35501	1.54714	0.790298	0.859487	0.724043	0.858161	0.70696	0.740934	1
ARHGAP15	1.31595	1.32545	1.32902	0.679965	0.615453	0.598514	0.899468	1.07522	1.32576	1	1.32488	1.34039	1.35533	0.670345	0.753206	0.646667	1.23344	1.11256	1.16608	1	1.45321	1.46413	1.45769	0.718075	0.644884	0.575474	0.849359	0.868309	1.03414	1
ARHGAP17	0.928009	0.896623	0.938234	1.30005	1.24763	1.4636	0.800747	0.771257	0.72695	1	0.96458	0.966497	1.03638	1.47604	1.37605	1.49266	0.685591	0.772477	0.678885	1	0.919266	0.993325	1.01148	1.39309	1.19506	1.21697	0.679241	0.731597	0.700323	1
ARHGAP18	1.48111	1.42932	1.40536	0.742106	0.746555	0.697488	0.708217	0.76641	0.834135	1	1.74272	1.9477	1.71912	0.787294	0.766786	0.656487	0.549005	0.683464	0.722846	1	1.92402	2.0288	1.84037	0.804065	0.750866	0.657514	0.551965	0.648017	0.801312	1
ARHGAP25	1.3905	1.45687	1.4581	0.860597	0.843618	0.785278	0.537872	0.559893	0.543752	1	1.69004	1.69252	1.73498	0.902831	0.888705	0.728449	0.489671	0.563441	0.544996	1	1.59965	1.55724	1.67117	0.85312	0.832175	0.709415	0.508188	0.611575	0.58586	1
ARHGAP26	0.840178	0.822783	0.908922	1.07636	1.06148	1.11026	1.05504	1.04967	1.14601	1	1.0941	1.00342	0.95007	1.7988	1.37449	1.28221	0.989053	1.2357	1.09317	1	0.997372	1.23548	1.17606	1.286	1.23251	1.19232	0.877007	0.847216	0.722504	1
ARHGAP27	1.56906	1.5554	1.59429	0.850904	0.812197	0.842541	0.706311	0.630344	0.867074	1	1.54664	1.49898	1.60767	0.853381	0.870946	0.767467	0.484263	0.562782	0.53217	1	1.43114	1.43191	1.3827	0.811918	0.763177	0.672109	0.525349	0.411349	0.347175	1
ARHGAP30	1.21388	1.19254	1.25164	1.1951	1.11624	1.15741	0.62437	0.686754	0.575558	1	1.11366	1.27301	1.20644	1.49369	1.16841	1.33931	0.607174	0.672836	0.542154	1	1.19902	1.2295	1.16344	1.10018	1.19356	1.16575	0.686773	0.684114	0.567462	1
ARHGAP35	1.61036	1.62735	1.40677	0.60341	0.743359	0.533698	0.623249	0.605302	0.741356	1	1.56887	1.63913	1.64097	0.784909	0.779813	0.751865	0.529446	0.471667	0.612089	1	1.55391	1.93435	1.83864	0.838188	0.805984	0.722129	0.668635	0.778999	0.696829	1
ARHGAP4	1.55665	1.60852	1.60755	0.735137	0.709377	0.656191	0.651279	0.641085	0.718933	1	1.66985	1.72226	1.6742	0.675779	0.673915	0.534248	0.469588	0.519562	0.456534	1	1.63844	1.65954	1.74337	0.692686	0.604714	0.478268	0.532508	0.609248	0.581137	1
ARHGAP45	1.50461	1.52567	1.47347	0.790499	0.769196	0.693424	0.672703	0.679216	0.713631	1	1.50517	1.59259	1.53017	0.837886	0.78566	0.712369	0.565005	0.600242	0.642679	1	1.52303	1.46746	1.52705	0.716754	0.720611	0.633782	0.576328	0.62618	0.588416	1
ARHGAP5	1.62266	1.59251	1.57356	0.911682	0.912871	0.796339	0.923523	0.800607	0.896319	1	1.46719	1.4444	1.50772	0.866152	0.816628	0.855804	0.50198	0.583619	0.838533	1	1.25766	1.2243	1.13011	0.799127	0.766274	0.785949	0.724601	0.646978	0.727549	1
ARHGAP9	0.901889	0.944942	1.00275	1.08312	1.09982	1.15569	1.53533	1.64347	2.17362	1	0.971958	0.906186	0.890724	1.20364	1.20207	1.39984	1.8832	1.95649	1.53719	1	0.907953	0.894606	0.895491	1.10161	1.11011	1.22318	1.23989	1.1827	1.34064	1
ARHGDIA	1.74972	1.81162	1.78871	0.611814	0.607868	0.443655	0.425116	0.444613	0.462164	1	1.72616	1.74282	1.83976	0.615332	0.677052	0.478283	0.465237	0.442319	0.477305	1	1.85895	1.85128	1.90377	0.579271	0.500668	0.418587	0.343121	0.367579	0.372955	1
ARHGDIB	1.66469	1.67689	1.73247	0.618215	0.615847	0.464805	0.438992	0.433021	0.4422	1	1.67633	1.66774	1.68046	0.565523	0.617298	0.4415	0.325549	0.336936	0.381805	1	1.95867	1.93098	1.92957	0.574023	0.467821	0.389453	0.337225	0.379913	0.32491	1
ARHGEF1	1.45482	1.45956	1.42779	0.728118	0.728663	0.649536	0.929578	0.885921	1.0101	1	1.41738	1.52031	1.44537	0.755852	0.752065	0.679981	0.871812	0.847275	0.944459	1	1.52897	1.50824	1.54075	0.699033	0.694417	0.616708	0.719704	0.775347	0.779879	1
ARHGEF11	1.28567	1.28995	1.30515	1.01891	1.1487	1.01655	1.0161	1.1001	0.921463	1	0.997901	1.12286	0.902666	0.833039	0.766607	0.837891	1.21518	1.17829	1.36828	1	1.39222	1.43452	1.36287	0.989468	1.08361	1.12442	0.657748	0.784053	0.815469	1
ARHGEF12	1.24599	1.19391	0.970833	0.911205	0.908747	0.916676	0.335193	0.513272	0.838969	1	2.18767	2.36087	1.91857	1.25618	1.24209	0.951507	1.42097	0.829152	3.42327	1	1.47765	1.35809	1.45918	1.06115	1.26332	1.12372	0.695671	0.76657	0.447791	1
ARHGEF18	0.847913	1.19752	0.93468	0.435739	0.226272	0.440486	1.91526	2.19531	2.05495	1	0.978674	1.28032	0.783188	0.619685	0.39767	0.351067	1.29263	1.30364	1.61678	1	1.48802	1.61882	1.23234	0.783023	0.723104	0.546004	1.03436	0.742145	0.601695	1
ARHGEF2	1.36179	1.36987	1.36025	0.662907	0.657779	0.592718	0.945097	1.01722	1.26217	1	1.3043	1.33495	1.36076	0.70975	0.693314	0.626126	1.10992	1.15108	1.19735	1	1.39021	1.35187	1.31147	0.647334	0.649551	0.525156	1.02479	0.939839	1.16034	1
ARHGEF3	0.691991	0.794602	0.794439	1.59549	1.48929	1.6777	0.766914	0.79491	0.645966	1	0.60189	0.627972	0.693757	1.26754	1.15562	1.49211	0.453805	0.699228	0.467621	1	0.831991	0.834896	0.775879	1.84536	1.96536	2.13088	0.765764	0.905178	0.559917	1
ARHGEF6	1.59299	1.64515	1.58444	0.85246	0.81313	0.811214	0.536888	0.582077	0.550074	1	1.43127	1.57889	1.58645	0.921572	0.867046	0.783477	0.56357	0.587677	0.480303	1	1.49035	1.44322	1.43965	0.750844	0.78353	0.647039	0.418622	0.536239	0.435733	1
ARHGEF7	1.20143	1.23227	1.17281	0.827647	0.798145	0.842	0.520969	0.597331	0.536822	1	1.36126	1.51994	1.39942	0.922611	0.797418	0.765881	0.582075	0.596798	0.489352	1	1.4553	1.47916	1.39109	0.87248	0.907773	0.810838	0.515795	0.584568	0.494875	1
ARID1A	0.432625	0.394872	0.42226	1.23584	1.24104	1.30941	1.84827	2.25762	2.6412	1	0.373631	0.345028	0.36554	1.36007	1.3054	1.56968	2.72676	2.52659	2.24633	1	0.414799	0.420549	0.432123	1.56748	1.64356	1.6996	1.91329	1.72547	2.30132	1
ARID1B	0.375359	0.364443	0.36031	1.27247	1.25837	1.41238	1.77331	2.24375	2.40772	1	0.473482	0.471803	0.475921	1.38393	1.25418	1.51242	2.55505	2.30015	1.99543	1	0.475727	0.486714	0.455706	1.62305	1.66523	1.70842	2.02642	1.72792	2.40261	1
ARID2	0.28905	0.303904	0.314023	0.563278	0.583081	0.548363	3.69765	4.32028	5.57826	1	0.328778	0.375614	0.351716	0.545779	0.667647	0.619761	5.01975	4.32729	4.15493	1	0.32418	0.321074	0.360561	0.65135	0.8394	0.751838	4.93434	3.97137	5.82229	1
ARID3B	0.4315	0.373564	0.454021	0.95232	0.975565	1.04986	2.4881	3.12415	4.1489	1	0.452281	0.459061	0.46068	0.98822	1.08018	1.30515	3.05527	3.2302	3.07338	1	0.509621	0.586159	0.637591	1.59645	1.74459	1.68646	2.72061	2.72467	2.93177	1
ARID4A	0.32433	0.332087	0.323303	0.542078	0.558544	0.663594	4.35574	3.74448	4.5301	1	0.284646	0.277216	0.261287	0.512904	0.569339	0.686089	4.45304	4.035	4.29277	1	0.390761	0.379175	0.373328	0.8051	0.951162	0.925922	3.88821	3.4055	5.36855	1
ARID4B	0.261619	0.247279	0.251428	1.15398	1.17055	1.26844	2.90703	2.60868	3.06816	1	0.29229	0.276052	0.306398	1.34069	1.26406	1.56983	3.11358	2.87758	2.52661	1	0.355918	0.377479	0.377384	1.49052	1.67262	1.78708	2.52097	2.21551	3.34389	1
ARID5A	0.443673	0.463111	0.46527	1.16084	1.06687	1.24547	2.6874	3.32241	4.16631	1	0.34579	0.351001	0.355337	1.11633	1.14828	1.18592	3.78825	3.25677	3.34596	1	0.40203	0.295159	0.371877	1.12286	0.924562	1.49261	3.24824	1.94764	2.8924	1
ARIH1	1.47197	1.49046	1.51676	0.878199	0.916549	0.874868	0.64895	0.634956	0.510411	1	1.49976	1.42513	1.48028	0.875496	0.939065	0.814561	0.589531	0.588313	0.442281	1	1.33559	1.37694	1.46889	0.825741	0.824072	0.744826	0.635769	0.579079	0.63697	1
ARIH2	1.18867	1.17625	1.26062	0.635867	0.700061	0.619385	0.646339	0.696347	0.705487	1	1.36047	1.28124	1.24303	0.825957	0.934542	0.852888	0.606359	0.62067	0.78888	1	1.43147	1.52043	1.47394	0.849857	0.826821	0.726351	0.629377	0.680323	0.662751	1
ARL1	0.922801	0.972557	0.989017	1.46855	1.33503	1.42781	0.624658	0.56432	0.377843	1	0.85363	0.949695	0.936817	1.42763	1.34022	1.40394	0.580849	0.72498	0.609757	1	0.91037	1.02246	1.03498	1.50219	1.75579	1.65547	0.833821	0.946442	0.76656	1
ARL14EP	0.882249	0.754493	0.79378	0.931831	0.894834	0.973695	1.75737	2.22389	2.30843	1	0.773634	0.841391	0.734936	1.13151	0.982138	1.23686	1.97286	2.31553	1.65766	1	0.820964	0.832756	0.841984	1.24032	1.29413	1.37449	1.8447	1.59671	1.83601	1
ARL15	0.629841	0.699421	0.672165	1.73154	1.31454	2.10738	1.69533	1.95907	1.39678	1	0.38576	0.406773	0.345831	2.18313	2.14868	2.74136	0.700074	0.824143	0.4913	1	0.524908	0.539943	0.364759	1.87104	2.32886	2.58159	0.795324	0.934488	0.525715	1
ARL2	0.896311	0.852244	0.856023	1.1484	1.1607	1.14243	3.3332	2.33862	3.09647	1	1.34606	1.32404	1.47986	2.16539	2.07342	1.88524	0.39281	0.52014	0.122522	1	1.17272	1.14581	1.23086	1.46612	1.46635	1.45547	0.955472	0.9099	0.54164	1
ARL2BP	1.75282	1.77072	1.82842	0.539151	0.449009	0.399316	0.19817	0.306948	0.290942	1	1.88349	1.86153	1.81691	0.477142	0.516904	0.336479	0.257915	0.274965	0.21073	1	1.97352	1.95909	1.90049	0.60964	0.55729	0.4591	0.414885	0.551325	0.337761	1
ARL3	1.72593	2.16731	1.9697	0.670553	0.611998	0.688022	0.223119	0.30205	0.534699	1	1.60823	1.6846	1.72742	0.737156	0.705888	0.605584	0.430173	0.49371	0.72878	1	1.73866	1.83855	1.82621	0.723751	0.60675	0.564358	0.695572	0.712051	0.609151	1
ARL6	0.915045	0.882737	0.927907	1.25932	1.34677	1.25283	0.750807	0.540262	0.329996	1	1.3498	1.34321	1.35866	1.20401	1.23775	1.11901	0.474493	0.522836	0.682348	1	1.64863	1.56164	1.64418	1.09059	1.10697	1.02849	0.447414	0.564223	0.324845	1
ARL6IP4	1.0919	1.11378	1.15918	1.13942	1.27037	1.16048	1.02361	0.942767	0.962275	1	1.05367	1.00111	1.02363	1.30846	1.32675	1.43037	0.694258	0.897831	0.483436	1	1.13041	0.903386	1.00836	1.04159	0.998315	1.07752	0.771256	0.921701	0.999602	1
ARL6IP5	0.218299	0.244931	0.25458	2.4187	2.21614	2.66041	0.988612	0.978697	0.595715	1	0.295004	0.293867	0.290368	2.3397	2.05263	2.58395	0.627871	0.855149	0.533218	1	0.358782	0.431598	0.400589	2.11165	2.21774	2.29532	0.856946	0.955217	0.641484	1
ARL6IP6	0.268863	0.238855	0.26064	1.98846	1.71983	2.1645	1.23428	0.884229	0.781685	1	0.147904	0.148701	0.17079	2.43802	2.25017	2.55235	0.674509	0.775352	0.627808	1	0.365476	0.309271	0.323702	2.02656	2.30608	2.27767	0.97495	1.1193	0.39742	1
ARL8A	0.568835	0.618326	0.645533	1.65892	1.56528	1.69743	0.670214	0.649449	0.38956	1	0.375794	0.404881	0.426824	1.90193	1.8277	2.0726	0.40153	0.606631	0.241307	1	0.664322	0.644242	0.651915	2.0059	1.80403	2.04831	0.627354	0.860732	0.344037	1
ARL8B	0.432654	0.508716	0.453039	1.97852	1.94993	2.00058	0.828061	0.781685	0.551714	1	0.207094	0.198743	0.225695	2.11502	1.73934	2.1586	0.506611	0.853484	0.333508	1	0.582522	0.623416	0.512732	1.93444	2.01678	2.2166	0.971933	1.00677	0.617943	1
ARMC1	0.654121	0.664865	0.62783	1.83367	1.75592	2.11397	1.06436	0.935395	0.812612	1	0.488689	0.429917	0.450218	2.00671	1.67178	2.17575	0.583465	0.94673	0.605458	1	0.71089	0.73857	0.733435	1.69141	1.90738	1.90026	1.16947	1.217	1.17626	1
ARMC10	0.235094	0.256583	0.271256	2.0778	1.82658	2.16301	0.785106	0.98549	0.565265	1	0.213839	0.246419	0.248199	2.06659	2.00807	2.4226	0.660063	0.92941	0.409793	1	0.326394	0.393594	0.33224	1.99071	2.19053	2.24175	0.868754	1.08739	0.504876	1
ARMC6	1.53222	1.56794	1.52739	0.680626	0.642087	0.560468	0.567898	0.580884	0.563462	1	1.93389	1.83233	1.82287	0.55384	0.714713	0.426621	0.481667	0.47586	0.533594	1	1.60799	1.763	1.65361	0.695085	0.649804	0.685242	0.57868	0.533387	0.452628	1
ARMC8	0.928478	0.910035	0.857478	1.24032	1.2492	1.34689	1.10006	1.07073	0.940556	1	0.985265	0.948383	0.977373	1.44558	1.43318	1.52557	1.08059	1.16245	0.940662	1	0.858877	0.918453	0.93815	1.47715	1.5139	1.53829	1.15545	1.08204	1.13044	1
ARMCX2	0.618878	0.668471	0.540176	1.20321	1.47299	1.10497	0.591296	0.522798	0.660396	1	0.487769	0.532259	0.517809	1.69207	1.38303	1.57514	0.881906	1.59764	2.01673	1	0.938898	1.12768	0.92652	1.93179	1.59992	2.29078	1.39918	2.25291	1.70249	1
ARMCX3	0.765588	0.724599	0.732215	1.81606	1.77907	1.92484	0.938137	0.879702	0.647489	1	0.785531	0.8388	0.822531	1.91884	1.81548	2.07168	0.695676	0.811772	0.713375	1	0.640296	0.645779	0.661813	1.45835	1.55105	1.7291	0.860043	0.802284	0.519664	1
ARMT1	1.7498	1.76276	1.65764	0.757205	0.796507	0.710509	0.69612	0.654369	0.631375	1	1.93676	2.0236	2.00661	0.657356	0.696415	0.526481	0.790809	0.80156	0.704507	1	1.67055	1.51032	1.67852	0.663186	0.556253	0.58357	0.605632	0.496206	0.769461	1
ARNT	1.07664	1.03708	1.07851	0.802233	0.792349	0.866668	1.2606	1.6666	1.86622	1	1.13796	1.01332	1.25338	0.941759	1.14792	1.04537	1.7589	1.41515	1.58016	1	1.33475	1.38473	1.33596	1.09015	1.03749	1.0629	1.4392	1.21066	1.2437	1
ARPC1A	1.44637	1.43392	1.4596	0.69331	0.729579	0.628482	0.996032	0.851643	0.885871	1	1.37411	1.42719	1.45403	0.641736	0.731669	0.565626	1.5553	1.23872	1.6426	1	1.53951	1.51501	1.5163	0.859669	0.820579	0.77716	1.15392	1.18923	1.45102	1
ARPC1B	1.46459	1.43012	1.47551	0.738588	0.742223	0.613233	0.824173	0.939111	1.10595	1	1.43454	1.37664	1.37279	0.725944	0.765215	0.689961	1.2753	1.08818	0.93063	1	1.56127	1.58433	1.54901	0.758083	0.751046	0.677655	0.875552	0.888175	0.996733	1
ARPC2	1.55659	1.57958	1.55177	0.74875	0.747433	0.620993	0.728305	0.780688	0.916359	1	1.5802	1.53298	1.47688	0.675248	0.702665	0.585373	1.05195	0.873835	0.905247	1	1.75307	1.73758	1.70549	0.708301	0.671955	0.620246	0.69516	0.734245	0.984934	1
ARPC3	1.6797	1.65717	1.66411	0.825768	0.784471	0.683689	0.839965	0.894922	1.04024	1	1.66224	1.6532	1.59243	0.818189	0.790326	0.705497	1.30813	1.04265	0.949112	1	1.59843	1.61952	1.63625	0.672708	0.721856	0.643273	0.773964	0.831919	0.973649	1
ARPC5	1.56364	1.65219	1.55839	0.736851	0.706883	0.584177	0.726073	0.759803	0.880709	1	1.61466	1.61071	1.4896	0.675762	0.719839	0.614011	1.08334	0.87881	0.920635	1	1.69263	1.67604	1.66668	0.645744	0.63972	0.586798	0.711932	0.719733	0.977108	1
ARPC5L	1.30231	1.3009	1.2711	0.881427	0.905742	0.79031	1.07099	1.19062	1.2771	1	1.40985	1.41262	1.38781	0.879824	0.943048	0.914513	1.74779	1.34229	1.1394	1	1.37748	1.45527	1.41322	0.899015	0.95909	0.883911	0.938687	0.980411	1.13858	1
ARPP19	1.30305	1.31171	1.42335	0.823538	0.827457	0.674851	0.591046	0.519287	0.64085	1	1.48659	1.47485	1.73244	1.05701	1.13373	0.931354	0.598113	0.702728	0.439758	1	1.43343	1.39007	1.3948	0.764218	0.670209	0.673907	0.607468	0.585287	0.543403	1
ARR3	1.06799	1.18446	1.30269	0.907505	0.987095	1.00325	0.457763	0.892975	0.760883	1	0.458126	0.516265	0.478954	0.946173	1.01147	1.15038	0.893301	0.769755	0.221284	1	1.25093	1.26905	1.23993	0.812174	0.643421	0.615413	0.359019	0.451476	0.178812	1
ARRB1	1.1631	1.32717	1.27346	1.00897	1.03503	0.932112	1.04904	1.04082	1.06182	1	1.34374	1.32859	1.28521	0.947683	0.991016	0.964194	0.860236	0.870346	0.687346	1	1.27021	1.30367	1.40833	0.802488	0.671661	0.651231	0.660156	0.607092	0.800885	1
ARRB2	0.996228	1.01323	1.02763	1.06806	1.04278	1.06405	1.39728	1.52946	1.78816	1	1.13835	1.17033	1.06658	1.07403	1.08205	1.06126	1.52052	1.56894	1.43706	1	1.14994	1.15741	1.2014	1.05149	0.997946	0.98441	1.29021	1.25375	1.44912	1
ARRDC1	0.940828	1.03863	0.911771	1.30559	1.3183	1.16657	0.935405	1.20057	1.28835	1	0.813989	0.833772	0.765398	1.12548	1.0352	1.32262	0.865589	1.2956	1.05673	1	1.16225	1.21991	1.30094	1.33559	1.26922	1.24284	0.883178	0.948059	0.710428	1
ARSA	1.00537	0.988581	1.07513	0.853083	0.889591	0.770044	0.389645	0.698983	0.70643	1	1.45464	1.45261	1.55776	1.27273	1.15192	1.31404	0.619268	0.562386	0.73886	1	1.82102	1.91769	1.83702	1.38946	1.29691	1.47501	0.387683	0.667193	0.460804	1
ASAH1	0.906087	0.87349	0.935251	1.35868	1.27717	1.28237	0.730114	0.683324	0.534082	1	1.0212	0.984015	1.01556	1.95068	1.57157	1.87862	0.555687	0.817602	0.556289	1	0.708499	0.723397	0.821718	1.87533	1.58411	2.02825	0.761504	0.837007	0.515427	1
ASAP1	1.62782	1.57298	1.71381	0.765746	0.721362	0.677473	0.635958	0.678213	0.720077	1	1.77429	1.69039	1.6472	0.744603	0.757591	0.650966	0.563457	0.604333	0.56432	1	1.6362	1.68408	1.58688	0.616447	0.564893	0.531402	0.493374	0.465613	0.438513	1
ASB9	1.348	1.73856	1.10406	0.602157	0.705379	0.795371	2.93296	1.61001	1.17374	1	1.52327	1.61265	1.04785	0.761678	0.783869	0.460556	2.42278	2.18924	2.39088	1	1.52314	1.86006	1.6027	1.0052	0.849561	0.583512	2.9061	2.04589	3.69402	1
ASCC1	1.44049	1.34162	1.51441	1.03167	1.06683	0.973666	1.66986	1.05915	1.19699	1	1.37615	1.46222	1.49802	0.965382	1.18599	0.995454	1.12814	0.862641	0.902726	1	0.974467	0.931573	1.02717	0.787634	0.704604	0.655277	0.987712	0.950902	1.21657	1
ASCC2	1.5155	1.49654	1.55266	0.821673	0.838178	0.862319	0.849955	0.991587	1.14834	1	1.36452	1.41616	1.54067	0.99056	0.992396	1.01227	0.999616	1.03941	0.886055	1	1.2918	1.29922	1.35481	0.8636	0.743151	0.741428	0.695938	0.738857	0.863578	1
ASCC3	1.37035	1.35466	1.37556	0.80362	0.835926	0.861719	0.725533	0.708245	0.706571	1	1.47257	1.46966	1.54493	0.948371	0.92421	0.891298	0.811977	0.882024	0.802382	1	1.4151	1.39411	1.44188	0.761395	0.716372	0.680702	0.714154	0.735214	0.719025	1
ASF1A	0.966427	1.1236	0.965084	0.789523	0.776055	0.786361	0.710466	0.953617	1.07907	1	1.26294	1.29762	1.29945	0.930331	1.05928	0.972025	1.4175	1.37653	1.12423	1	1.22605	1.28987	1.38245	1.12666	0.872437	1.00847	1.19272	1.18978	1.39943	1
ASH2L	0.42029	0.390516	0.368415	1.00344	1.05361	1.16942	2.37653	2.96419	3.42655	1	0.456614	0.421764	0.482759	1.16837	1.09983	1.30271	2.91364	2.9182	2.53368	1	0.51527	0.484619	0.505749	1.32799	1.33375	1.4362	2.56467	2.24335	3.09623	1
ASL	1.34066	1.3704	1.35095	0.593472	0.561238	0.470596	0.431428	0.481315	0.486744	1	1.83234	1.93134	1.72894	0.828377	0.816778	0.791422	0.305461	0.300592	0.568577	1	1.79862	1.62446	1.59745	0.854924	0.878076	0.859068	0.697369	0.55096	0.643455	1
ASMTL	1.17402	1.20803	1.17513	0.926938	0.946654	0.946894	0.837304	0.879322	0.870282	1	1.89499	1.97526	1.85296	0.9344	0.899839	0.881144	0.466692	0.671235	0.645509	1	1.1121	1.22504	1.13513	0.75891	0.790775	0.758253	0.523058	0.693076	0.630461	1
ASNA1	1.38907	1.39446	1.42769	1.01647	1.01455	1.03646	0.592115	0.638844	0.534578	1	1.55144	1.58384	1.51475	1.10505	1.09622	1.02654	0.73211	0.841469	0.767369	1	1.44507	1.39588	1.4106	1.0085	0.912576	0.94557	0.6355	0.714499	0.694594	1
ASNS	1.37567	1.38199	1.5507	0.748667	0.743345	0.741209	0.964859	0.792835	0.694996	1	1.69803	1.60503	1.56812	0.57786	0.706162	0.412281	0.486853	0.553475	0.835179	1	2.2469	2.25801	2.39621	0.637379	0.482538	0.424505	0.547811	0.717415	0.55539	1
ASNSD1	1.28654	1.30268	1.3389	0.834606	0.814843	0.791097	0.66278	0.655645	0.877079	1	1.36435	1.38073	1.49363	0.791094	0.882478	0.730345	0.505624	0.507523	0.560068	1	1.43549	1.56275	1.47838	0.885328	0.803782	0.728052	0.609608	0.720603	0.473477	1
ASPSCR1	1.26536	1.21096	1.1664	1.03173	1.00786	0.942647	1.0817	1.14479	1.06066	1	1.36901	1.35829	1.27979	0.86141	0.911141	0.874514	0.567242	0.615329	0.606061	1	1.33617	1.4621	1.49485	0.909347	0.864695	0.820883	0.636665	0.514318	0.450996	1
ASTE1	0.98133	0.908954	0.941615	1.08115	1.07829	1.18375	1.95086	1.51242	1.76325	1	0.875654	0.876091	0.845738	1.01751	1.10351	1.08401	1.33852	1.67568	1.67908	1	1.15111	1.11651	1.40595	0.939704	0.945936	1.00993	1.06967	1.78954	1.40308	1
ASUN	0.527854	0.509763	0.56319	1.03495	1.02863	1.1604	2.0822	2.57098	2.69283	1	0.501357	0.437003	0.487514	1.0998	1.14412	1.28732	3.04925	2.7526	2.50599	1	0.504564	0.526216	0.558328	1.24285	1.37949	1.36261	2.61088	2.17122	2.81482	1
ASXL1	0.835945	0.860583	0.881743	0.936148	0.924859	1.12812	1.30947	1.25331	1.48999	1	0.630512	0.720094	0.652236	1.22059	1.29306	1.38084	1.34426	1.23443	1.48803	1	0.788228	0.807177	0.828133	1.32591	1.49532	1.49994	1.21207	1.39377	1.19024	1
ASXL2	0.348701	0.478016	0.469507	1.21062	1.33607	1.49833	1.5726	2.6912	3.13742	1	0.729516	0.678776	0.75837	1.14701	1.25001	1.36141	1.84296	1.60707	2.03827	1	0.245922	0.240067	0.227829	1.73032	1.81084	1.9762	2.41817	2.50588	2.38154	1
ATAD1	0.517245	0.550204	0.581037	1.83755	1.75174	2.0233	1.01104	1.09697	0.651126	1	0.441623	0.403919	0.457108	2.07375	1.88166	2.34991	0.927224	0.948279	0.987961	1	0.346527	0.373433	0.361591	1.96389	2.05968	2.23428	1.04511	1.13099	0.881759	1
ATAD2	0.437544	0.552638	0.417856	0.524083	0.450041	0.743919	4.40056	4.02627	5.04967	1	0.544006	0.446059	0.478532	0.581336	0.556078	0.532036	5.05796	4.53836	4.32909	1	0.50142	0.461154	0.488653	0.567934	0.69953	0.634355	5.49876	5.3077	8.74368	1
ATAD2B	0.301064	0.330004	0.37187	0.567759	0.581528	0.591272	3.9258	3.41207	4.8035	1	0.539373	0.450283	0.494519	0.589936	0.637852	0.599904	3.279	2.30233	3.93552	1	0.464991	0.430623	0.385944	0.440595	0.486408	0.627082	3.07537	2.48294	6.198	1
ATAD3A	0.238158	0.220693	0.20575	1.48692	1.36992	1.77976	1.36374	2.54361	2.24341	1	0.211759	0.244336	0.249618	1.57219	1.40348	1.56143	3.01957	2.37916	2.32314	1	0.211958	0.24276	0.236964	1.70438	1.69599	1.80205	2.73026	2.47136	2.4753	1
ATE1	1.30743	1.47412	1.30101	0.706696	0.691662	0.640209	0.563745	0.57467	0.525554	1	1.37088	1.44908	1.3578	0.750165	0.827837	0.791863	0.447204	0.58062	0.418949	1	1.6979	1.77989	1.71104	0.830455	0.800152	0.753952	0.443271	0.520128	0.453746	1
ATF1	0.34567	0.290042	0.328122	1.28733	1.2211	1.39803	1.59227	2.5049	2.92732	1	0.414616	0.416028	0.479887	1.00476	1.00579	1.06435	2.80474	2.56036	2.25849	1	0.563318	0.674464	0.636004	1.28502	1.39259	1.28623	2.50682	2.0593	2.51784	1
ATF2	0.402172	0.301734	0.333232	0.510854	0.59689	0.585123	3.2875	4.57017	5.62753	1	0.403064	0.289215	0.310883	0.532405	0.707633	0.57174	5.00921	4.28936	3.87753	1	0.34853	0.328845	0.346368	0.625551	0.708869	0.676627	4.43968	3.3315	3.9172	1
ATF6B	1.02754	1.06949	0.899374	1.17946	1.08086	1.18752	1.05409	0.589808	0.681544	1	0.389093	0.484062	0.460851	1.4001	1.3508	1.51203	0.827297	0.890989	0.642002	1	0.409958	0.495758	0.590845	2.29032	1.49368	1.99898	1.33613	1.08365	1.48753	1
ATF7	0.448952	0.380968	0.396235	0.695236	0.582384	0.423145	0.489141	3.20634	2.22854	1	0.404153	0.225419	0.373375	0.505694	0.24258	0.521558	3.85667	5.27246	5.90316	1	0.408095	0.270621	0.681304	1.07475	0.390013	1.02744	3.60695	3.02117	1.92792	1
ATF7IP	0.392323	0.356462	0.377072	1.20061	1.20316	1.3738	1.71	1.91252	2.1367	1	0.52042	0.502721	0.561133	1.55358	1.59565	1.61847	2.03589	1.62404	1.89847	1	0.345347	0.400094	0.446666	1.89336	1.76784	1.99858	2.01502	1.65909	1.99166	1
ATG13	1.28636	1.16493	1.34223	0.784765	0.714861	0.792289	0.763632	0.922921	1.10781	1	1.32125	1.47643	1.50832	0.936538	0.831768	0.753893	0.489228	0.513555	0.480754	1	1.29513	1.19936	1.27349	1.08003	0.930336	0.911037	0.557725	0.610329	0.467328	1
ATG14	0.8107	0.706577	0.883463	1.4079	1.25067	1.42412	0.749861	0.701105	0.526089	1	0.91929	0.999242	1.01805	1.48547	1.46618	1.47691	0.739463	0.701291	0.591928	1	0.916605	0.964825	0.931285	1.64065	1.65016	1.70002	0.544285	0.581629	0.237522	1
ATG16L1	1.56827	1.53098	1.58721	0.798184	0.747367	0.751157	0.553554	0.580128	0.518486	1	1.53392	1.62763	1.62919	0.804192	0.76962	0.670891	0.531824	0.60056	0.576976	1	1.67718	1.70789	1.71826	0.781688	0.817216	0.710528	0.533909	0.530054	0.56503	1
ATG2A	1.23174	1.12523	1.22509	0.833025	0.797522	0.723032	1.02631	1.14901	1.17967	1	1.43009	1.59562	1.37347	0.992925	0.995917	0.89984	0.366013	0.47785	0.474136	1	1.46324	1.46692	1.38689	1.05907	0.974379	0.90367	0.578333	0.729225	0.723982	1
ATG2B	1.33742	1.25231	1.30815	0.762002	0.814389	0.728724	0.702972	0.615823	0.657977	1	1.55642	1.52847	1.56192	0.804068	0.821605	0.684155	0.585288	0.561777	0.650605	1	1.54583	1.62955	1.50432	0.726081	0.795519	0.74838	0.643601	0.658084	0.722637	1
ATG3	1.49582	1.40536	1.54323	0.645447	0.654974	0.601455	0.819897	0.904663	1.044	1	1.50156	1.50369	1.50441	0.720766	0.663146	0.672744	0.673847	0.663134	0.731059	1	1.5212	1.55867	1.75098	0.81052	0.777879	0.618299	0.74723	0.695483	0.745871	1
ATG4B	1.67838	1.68099	1.64713	0.425191	0.457533	0.356113	0.2377	0.279376	0.274659	1	1.67193	1.71126	1.73446	0.641283	0.785149	0.482406	0.485502	0.518306	0.44686	1	1.75268	1.81537	1.77084	0.578892	0.557766	0.43329	0.434888	0.497141	0.331199	1
ATG4C	1.20525	1.17267	1.27678	0.755618	0.72302	0.822891	1.20758	1.22753	1.63594	1	1.21342	1.28959	1.23333	0.937219	0.824666	0.802531	0.533492	0.677084	0.687196	1	1.27053	1.48557	1.36063	0.860213	0.736682	0.696738	0.754594	0.906485	0.802011	1
ATG5	1.4199	1.45493	1.41465	0.767535	0.736876	0.609345	0.6386	0.529554	0.782183	1	1.61743	1.73277	1.66733	0.715462	0.819373	0.652323	0.388883	0.480016	0.422601	1	1.76803	1.88846	1.83847	0.798369	0.688919	0.641008	0.440966	0.310279	0.655742	1
ATG7	1.53779	1.52829	1.70827	0.599862	0.689995	0.589779	0.725386	0.670162	0.656065	1	1.55366	1.61579	1.7894	0.785259	0.74906	0.659033	0.865952	0.829783	0.821183	1	1.67044	1.54577	1.83811	0.713158	0.69129	0.6462	0.622416	0.712632	0.849687	1
ATG9A	0.561287	0.651569	0.53541	2.01157	1.65588	2.22929	0.937528	1.10905	0.843514	1	0.35441	0.298268	0.386666	1.99131	1.83503	1.98829	0.468195	0.656662	0.34067	1	0.425496	0.422031	0.390454	2.19482	2.36182	2.98274	1.43917	1.31685	0.846961	1
ATHL1	1.19143	1.26164	1.19591	0.526516	0.517209	0.475234	0.4812	0.325773	0.3637	1	1.53467	1.42204	1.56633	0.665432	0.797553	0.574636	0.44272	0.500639	0.395747	1	1.49391	1.633	1.46759	0.914425	0.845203	0.812836	0.688636	0.395775	0.195972	1
ATIC	1.69209	1.7629	1.71601	0.700167	0.737785	0.554675	0.512244	0.548192	0.537003	1	1.75802	1.82605	1.67095	0.612237	0.656218	0.457521	0.44425	0.470436	0.503016	1	1.63836	1.58148	1.57227	0.630371	0.585981	0.474379	0.527395	0.565737	0.57634	1
ATL1	0.348847	0.839919	0.515786	1.18942	1.23862	1.23819	0.799582	0.873595	0.491273	1	0.365218	0.28919	0.294229	1.80598	1.62237	1.66335	1.21027	1.25539	1.04766	1	0.37734	0.462453	0.406679	2.53899	2.34657	2.85596	0.967921	1.50654	0.56462	1
ATL2	0.254554	0.228274	0.245349	2.25862	2.0908	2.36655	0.85813	0.858406	0.68824	1	0.353825	0.342671	0.361827	2.43022	2.02419	2.42888	0.951677	1.08756	1.0821	1	0.343647	0.352615	0.265164	1.75976	1.98287	2.24482	1.05773	1.11103	0.957202	1
ATL3	0.307548	0.3037	0.333102	2.32319	2.16018	2.59712	1.03453	1.05113	0.712148	1	0.293448	0.30321	0.293778	2.42736	2.15191	2.6827	0.734239	0.93246	0.603259	1	0.362438	0.353843	0.368147	2.15191	2.41073	2.61502	0.902702	0.977442	0.610093	1
ATM	0.674059	0.643757	0.666005	1.43524	1.40138	1.61544	1.41408	1.07199	1.01017	1	0.640676	0.608591	0.651715	1.55726	1.51223	1.72872	1.12113	1.11251	1.03132	1	0.630441	0.675068	0.721479	1.76292	1.86825	1.81967	1.33122	1.24151	1.45007	1
ATOX1	1.66571	1.70406	1.91098	0.734319	0.693852	0.574712	0.661104	0.500717	0.35666	1	1.98607	1.89683	1.86222	0.680852	0.793762	0.407713	0.528073	0.422109	0.569083	1	1.82411	1.74612	1.81054	0.727748	0.594376	0.500639	0.420877	0.423171	0.531666	1
ATP11A	0.407071	0.400513	0.335571	1.71093	1.59927	1.90612	0.974434	1.00469	0.850036	1	0.325903	0.349657	0.466648	2.16913	1.90004	2.42405	1.07561	1.23195	1.19183	1	0.560263	0.500226	0.561123	1.69467	1.90933	2.09918	0.868307	0.889837	0.904947	1
ATP11B	0.449042	0.470495	0.373852	2.08986	1.89444	2.26285	1.03576	1.01521	0.779965	1	0.357505	0.320882	0.351678	1.99354	1.90013	2.24732	0.621668	0.833383	0.588761	1	0.456529	0.561754	0.526311	1.98288	2.20696	2.38272	0.949754	1.02644	0.804941	1
ATP11C	0.604627	0.605215	0.442179	1.58311	1.56863	1.8079	1.18504	1.0382	1.04491	1	0.407119	0.532114	0.527455	1.8679	1.66899	2.04819	0.941904	1.04766	0.688067	1	0.542182	0.651092	0.55582	1.708	2.0126	2.03316	1.08922	1.02896	1.05508	1
ATP13A1	0.398624	0.371653	0.378023	2.02667	1.90492	2.11952	0.859848	0.952751	0.664625	1	0.328741	0.324039	0.417839	2.10122	1.94592	2.34838	0.744643	1.09394	0.683647	1	0.555074	0.572354	0.542511	2.05234	2.08216	2.18136	0.999013	1.04268	0.63167	1
ATP1A1	0.386996	0.420654	0.44064	2.06909	1.88004	2.18814	1.073	1.24131	0.971173	1	0.378277	0.364023	0.384877	2.03275	1.85709	2.28039	0.945615	1.17555	0.929484	1	0.441226	0.46528	0.476178	1.89379	2.04182	2.22522	1.03633	1.07389	0.819359	1
ATP1B1	0.509614	0.426516	0.499797	1.26326	1.21147	1.29271	1.25808	1.27961	1.80978	1	0.55638	0.471297	0.596226	2.70617	2.63356	3.13225	1.51617	1.61189	1.94594	1	0.426534	0.411462	0.47045	1.78011	1.86888	1.98522	0.924994	1.04223	0.632161	1
ATP1B3	0.432829	0.452257	0.445289	2.05679	2.00949	2.24651	1.12234	1.26017	1.01729	1	0.418182	0.439132	0.450278	1.96961	1.8511	2.22202	1.12304	1.244	0.957317	1	0.510728	0.496719	0.548103	1.77934	1.81463	2.04251	1.24997	1.02563	0.79427	1
ATP2A2	0.31589	0.333066	0.347192	2.22115	2.07477	2.31939	0.849724	0.990853	0.716549	1	0.274354	0.322084	0.283367	2.31549	1.97794	2.53869	0.916463	0.960247	0.795886	1	0.385582	0.390842	0.399972	1.98568	2.25963	2.32653	1.0723	1.02228	0.570486	1
ATP2A3	0.257076	0.29875	0.301928	2.12469	1.97011	2.247	1.00827	1.06967	0.803747	1	0.296698	0.287215	0.258889	2.33947	1.96593	2.5942	0.633187	0.951132	0.472603	1	0.333302	0.348864	0.354492	2.04731	2.16076	2.34618	0.906044	0.970569	0.569371	1
ATP2B1	0.71152	0.714805	0.668124	1.89168	1.72868	2.00521	0.949485	1.08708	0.849815	1	0.38208	0.454456	0.465746	2.01844	2.00986	2.31404	1.10549	1.23429	0.812867	1	0.39711	0.508523	0.499176	1.82683	2.05975	2.01021	1.02524	1.1307	0.717307	1
ATP2B4	0.456351	0.41015	0.396688	1.5873	1.57517	1.81541	0.934813	1.07221	1.02084	1	0.438429	0.430849	0.447349	2.17516	1.92255	2.46344	1.17075	1.46103	1.03884	1	0.585915	0.582393	0.564348	1.86624	1.95452	2.0772	1.25249	1.14765	0.976412	1
ATP2C1	0.579661	0.417153	0.539793	1.53603	1.86494	1.55637	1.01395	1.10882	0.846238	1	0.50249	0.496783	0.627949	1.82913	2.14557	2.30849	1.13629	1.18026	1.26383	1	0.388202	0.388585	0.356736	1.64195	2.08054	2.25253	1.1747	1.09617	0.919382	1
ATP5A1	0.303913	0.310401	0.315665	1.95995	1.88478	2.14723	0.852354	0.928133	0.628827	1	0.274481	0.258627	0.269324	2.18812	2.01051	2.45926	0.720903	0.882273	0.632777	1	0.330452	0.319326	0.334698	2.28927	2.35948	2.60669	1.00291	1.04171	0.624237	1
ATP5B	0.375189	0.378329	0.389615	2.13212	2.01173	2.14411	0.901886	0.861133	0.592766	1	0.334186	0.343823	0.357193	2.31634	2.01234	2.44467	0.754363	0.888858	0.750651	1	0.450392	0.464625	0.474451	2.0593	2.02478	2.36869	0.970122	0.994475	0.692846	1
ATP5C1	0.346591	0.374455	0.390454	1.96495	1.88243	2.06655	0.932692	0.981308	0.71187	1	0.271526	0.228708	0.266462	2.37196	2.10553	2.62378	0.808252	0.905294	0.65108	1	0.290114	0.319004	0.329632	2.31348	2.23106	2.67799	0.93022	1.03571	0.602729	1
ATP5D	0.267978	0.263238	0.302946	2.23761	2.02721	2.34453	0.898388	0.956561	0.667489	1	0.295821	0.280836	0.304931	2.12779	2.23003	2.60039	0.817361	0.873289	0.617412	1	0.493513	0.440259	0.50421	2.0275	2.16704	2.40405	1.00739	1.06578	0.778837	1
ATP5F1	0.297337	0.283553	0.298989	1.78096	1.71077	1.96355	0.90962	0.915003	0.645454	1	0.286406	0.284744	0.289615	2.08569	1.85815	2.40428	0.665541	0.834727	0.507326	1	0.395656	0.393687	0.357624	2.42729	2.42075	2.74323	0.947392	1.03925	0.608076	1
ATP5H	0.260985	0.224722	0.26242	1.9832	1.92841	2.18328	0.883961	0.916782	0.597711	1	0.246285	0.244491	0.250547	2.31988	2.06008	2.559	0.713544	0.922426	0.562538	1	0.283003	0.279529	0.328175	2.31545	2.44491	2.83307	0.948254	0.998303	0.51284	1
ATP5I	0.355198	0.337229	0.387189	2.05522	1.82106	2.26922	0.924728	0.964901	0.735487	1	0.297337	0.21944	0.308231	2.27821	2.0499	2.52305	0.799291	0.886592	0.640843	1	0.343848	0.41947	0.381725	2.22011	2.07961	2.67692	0.87153	1.09978	0.532172	1
ATP5J	0.216477	0.191748	0.224029	2.39024	2.14805	2.42767	0.77205	0.846768	0.419442	1	0.182548	0.239689	0.192344	2.46958	2.01986	2.48635	0.57996	0.734291	0.462787	1	0.280963	0.292424	0.281748	2.43638	2.44788	2.85688	0.927568	0.942634	0.427047	1
ATP5L	0.301193	0.311356	0.411794	2.08158	1.9121	2.36618	0.911417	0.802788	0.47887	1	0.318422	0.207829	0.28416	2.38089	1.94821	2.64138	0.699558	0.844851	0.817138	1	0.505887	0.470269	0.44807	2.16863	2.1297	2.34421	0.985718	1.08466	0.736975	1
ATP5O	0.247118	0.2701	0.271314	1.83566	1.62685	1.89019	0.85729	0.891719	0.716628	1	0.290104	0.259753	0.30846	2.06791	1.72448	2.19418	0.732802	0.852332	0.699806	1	0.40061	0.405271	0.440809	2.26132	2.56738	2.68923	1.18912	1.19277	0.830653	1
ATP5S	0.214323	0.225826	0.236265	1.85889	1.67205	1.89894	0.871065	0.915089	0.63249	1	0.206496	0.210147	0.217076	1.85374	1.38652	1.78688	0.589831	0.726837	0.546773	1	0.558602	0.518033	0.582944	2.48522	2.53667	2.79021	1.12254	1.21265	0.73391	1
ATP6AP1	0.414243	0.513654	0.433369	1.84858	1.43904	1.66572	0.879519	0.895871	0.669862	1	0.429456	0.42127	0.408817	1.75122	1.67113	1.87259	0.580976	1.19132	0.583744	1	0.40588	0.626395	0.577667	2.16999	2.13454	2.17414	1.56861	1.39271	1.91215	1
ATP6V0A1	0.367863	0.366543	0.363989	1.7855	1.68059	2.14114	1.24426	1.11906	1.09732	1	0.29468	0.239153	0.269027	1.52888	1.51313	1.82426	1.03312	1.05584	1.0087	1	0.633628	0.686978	0.583136	1.57323	1.83535	2.04558	1.1566	0.937901	0.867579	1
ATP6V0A2	0.320459	0.377259	0.305688	1.45007	1.37382	1.48696	0.681219	1.03531	1.37505	1	0.451606	0.412025	0.32505	1.81431	1.81925	2.47536	0.838812	1.08576	0.715804	1	0.630506	0.52068	0.603878	1.61045	1.8067	1.81432	0.925654	1.10543	0.851331	1
ATP6V0D1	0.305699	0.267717	0.298714	1.61338	1.51052	1.67166	0.78523	0.804668	0.564806	1	0.343131	0.375763	0.333531	1.77737	1.54047	2.16582	1.03446	1.14645	1.16773	1	0.469569	0.45756	0.459545	1.69478	1.94945	1.89873	1.29682	1.20567	1.17229	1
ATP6V1A	1.36243	1.36608	1.41556	0.793687	0.82065	0.712652	0.614303	0.589779	0.723942	1	1.47245	1.45331	1.48289	0.850188	0.892565	0.825332	0.58608	0.583327	0.669296	1	1.53287	1.42084	1.47312	0.839952	0.841581	0.746774	0.555416	0.608818	0.647938	1
ATP6V1B2	1.28029	1.31982	1.47829	0.843465	0.866444	0.766828	0.529613	0.634922	0.572092	1	1.4978	1.44743	1.57592	0.821074	0.792589	0.741634	0.595392	0.575787	0.867963	1	1.71194	1.57896	1.78341	0.863183	0.726379	0.626516	0.64643	0.635554	0.707833	1
ATP6V1C1	1.4038	1.52524	1.43361	0.813685	0.772434	0.688758	0.417842	0.481621	0.409933	1	1.6091	1.6577	1.65835	0.748883	0.745859	0.688632	0.43698	0.528095	0.458289	1	1.38463	1.47354	1.40058	0.744882	0.727553	0.677427	0.479681	0.536515	0.594489	1
ATP6V1D	1.39742	1.43584	1.405	0.682514	0.712751	0.681578	0.619858	0.666406	0.693171	1	1.55541	1.51245	1.54521	0.790498	0.789991	0.765618	0.506767	0.773165	0.83672	1	1.7631	1.6957	1.84541	0.867048	0.771285	0.749304	0.611103	0.566028	0.575529	1
ATP6V1E1	1.34592	1.42891	1.39353	0.844907	0.817017	0.807061	0.540328	0.588778	0.638242	1	1.58348	1.55569	1.6112	0.913453	0.89565	0.810459	0.655827	0.611362	0.816606	1	1.65577	1.63352	1.77548	0.913324	0.768383	0.811251	0.577252	0.729925	0.52138	1
ATP6V1F	1.14727	1.15353	1.11612	0.940078	0.952148	0.981908	0.776485	0.804395	0.833497	1	1.39143	1.30111	1.28184	0.947961	0.931903	1.03954	0.494316	0.550436	0.696015	1	1.41688	1.34527	1.40733	1.08828	1.04085	1.07303	0.676184	0.742316	0.827813	1
ATP6V1G1	1.35684	1.29866	1.33701	0.845657	0.803249	0.736847	0.334378	0.3808	0.263637	1	1.54827	1.59645	1.36133	0.923821	0.761895	0.761779	0.507287	0.494165	0.297295	1	1.77754	1.89682	1.79774	0.819615	0.684574	0.656063	0.268442	0.307571	0.0890915	1
ATP6V1H	1.43906	1.5148	1.42813	0.709448	0.676796	0.651471	0.694834	0.446621	0.388072	1	1.7001	1.70635	1.60939	0.775938	0.757361	0.669118	0.430554	0.460488	0.842931	1	1.81072	1.8607	1.8793	0.720331	0.705563	0.542626	0.573814	0.420222	0.640157	1
ATP7A	0.439495	0.315145	0.329555	1.9404	1.79688	2.04117	1.06627	1.49212	1.11182	1	0.326861	0.342024	0.344838	1.96011	1.68547	2.16554	1.18167	1.11773	1.21999	1	0.482767	0.459299	0.445704	1.80479	1.86509	2.36343	1.33202	1.44001	1.14048	1
ATP8A1	0.628781	0.573715	0.502833	1.79251	1.44987	2.02638	0.819395	1.07069	0.984592	1	0.986246	1.03749	1.24702	1.49352	1.03667	1.2141	0.66072	0.855732	1.04529	1	0.548909	0.562738	0.618268	2.11672	2.34161	2.40247	1.30077	1.36719	1.1699	1
ATPAF1	0.524147	0.554463	0.556992	1.74341	1.68271	1.84069	0.76343	0.983363	0.483867	1	0.643875	0.754558	0.721103	2.55067	1.83617	2.58867	0.572178	1.17811	1.03953	1	0.405693	0.447389	0.459635	2.11538	2.04011	2.43018	1.16835	1.2601	0.891009	1
ATPAF2	0.425617	0.473118	0.43126	1.96613	1.97657	2.07372	1.07778	1.03442	0.941657	1	0.276672	0.226133	0.264023	2.25747	2.11578	2.43151	0.577442	0.728631	0.331084	1	0.319708	0.401925	0.419166	1.883	1.8959	2.2114	0.974781	0.992178	0.417592	1
ATPIF1	0.334674	0.359646	0.353339	2.44993	2.29799	2.1857	1.10798	0.945872	0.829613	1	0.334093	0.342816	0.338468	2.29106	2.07677	2.34867	0.777325	0.894962	0.529832	1	0.485712	0.497938	0.494721	1.81911	2.05488	2.2692	0.964209	1.09239	0.799457	1
ATR	0.931193	1.09525	1.01677	1.30145	1.18972	1.34892	1.05779	1.30539	1.0858	1	0.931864	0.983336	0.904379	1.28656	1.19117	1.28118	1.09081	1.11488	1.1072	1	1.01727	1.01717	1.10757	1.1226	1.13639	1.09918	1.49599	1.49266	1.46645	1
ATRX	0.370981	0.370974	0.346596	1.07388	1.06708	1.22482	3.33473	2.65172	3.02232	1	0.343651	0.338608	0.360464	1.14397	1.15862	1.35488	3.43108	3.00702	2.73395	1	0.401113	0.415347	0.422448	1.27907	1.46117	1.48363	3.2797	2.64634	4.07662	1
ATXN1	1.10472	1.30502	1.38058	1.10166	1.2231	1.46377	1.99554	2.49642	3.18576	1	0.699438	0.761257	0.94348	1.22959	1.43976	1.9227	1.59361	2.17164	3.4213	1	0.829386	0.844162	0.998662	1.20131	1.01896	0.990328	1.26923	1.24203	0.762894	1
ATXN10	1.47063	1.50599	1.54736	0.60444	0.623369	0.513455	0.399959	0.446626	0.354647	1	1.76183	1.78477	1.76812	0.860245	0.846295	0.669832	0.49	0.582986	0.586212	1	1.77805	1.73655	1.8332	0.65119	0.617511	0.564711	0.703928	0.655363	0.74121	1
ATXN1L	0.587191	0.645479	0.706953	0.760751	0.855677	1.07646	1.94633	2.4091	2.74849	1	0.551905	0.550178	0.667055	1.31728	1.44455	1.74789	2.87145	3.06851	2.92569	1	0.438309	0.552024	0.769715	0.938936	1.237	1.42971	3.43608	2.59234	1.4947	1
ATXN2	1.24166	1.15134	1.20009	0.990482	1.01197	1.05087	0.57479	0.634094	0.538555	1	1.33531	1.21329	1.21814	1.14332	1.08166	1.17528	0.545889	0.690186	0.543617	1	1.38592	1.35496	1.50374	1.08681	0.946055	1.02939	0.666525	0.611499	0.803777	1
ATXN2L	1.36669	1.33592	1.39262	0.753181	0.815743	0.761839	0.497458	0.602565	0.57075	1	1.59649	1.62938	1.63302	0.805566	0.870268	0.779835	0.51974	0.587137	0.507666	1	1.53593	1.53542	1.59957	0.803466	0.733232	0.647853	0.697019	0.6331	0.618066	1
ATXN3	1.68795	1.69564	1.67463	0.683506	0.625827	0.529773	0.444106	0.446318	0.353298	1	1.61727	1.61804	1.74964	0.689724	0.704756	0.601608	0.569339	0.600729	0.436501	1	1.79029	1.82001	1.8678	0.695283	0.595134	0.507814	0.393471	0.455075	0.325647	1
ATXN7	0.375951	0.258188	0.37213	0.798023	0.888653	1.03588	2.27897	2.7822	3.78104	1	0.197107	0.134414	0.221912	0.642667	0.832243	0.642367	4.19149	5.03324	6.2689	1	0.215719	0.166262	0.165034	0.76371	0.696049	0.684568	4.59632	3.97705	4.58615	1
ATXN7L3	0.477003	0.514363	0.596941	0.909491	0.9181	1.14058	2.23612	2.52515	2.90997	1	0.482662	0.429635	0.445893	0.947049	0.904889	1.0072	3.41724	2.98134	2.80883	1	0.66157	0.697064	0.628179	1.12054	1.11562	1.24948	3.03879	2.56855	3.62703	1
ATXN7L3B	1.37058	1.32187	1.41491	0.501954	0.560796	0.454839	0.652359	0.51728	0.608564	1	1.76525	1.83385	1.64123	0.590209	0.619165	0.575845	0.647109	0.653907	0.585601	1	1.5882	1.54903	1.54644	0.612331	0.622249	0.56309	0.611412	0.601251	0.662544	1
AUH	0.388036	0.384744	0.390222	2.33853	2.47475	2.18742	0.991948	1.02724	0.645928	1	0.305902	0.356844	0.239919	1.6483	1.44746	1.74152	0.694149	0.806349	0.584129	1	0.505972	0.568375	0.488766	1.80521	2.11452	2.09391	1.18028	1.13533	0.812005	1
AUP1	0.884781	0.87038	0.857013	1.6935	1.50543	1.82512	0.925181	1.27675	1.124	1	0.454218	0.625987	0.566101	2.25519	2.13487	2.67489	0.982115	1.05321	1.42603	1	0.417313	0.445554	0.59687	1.78231	1.74261	2.31446	1.46835	1.42859	1.2592	1
AURKAIP1	0.128139	0.158562	0.161147	2.72332	2.3555	2.88005	1.04713	1.035	0.569062	1	0.126485	0.1563	0.14319	2.32039	1.84821	2.31447	0.640659	0.711138	0.39219	1	0.160593	0.182551	0.199003	2.76825	2.80354	3.04794	0.946683	1.03186	0.85756	1
AVEN	1.36594	1.45261	1.35903	0.847651	0.856936	0.886371	0.510605	0.593211	0.606598	1	1.39442	1.32533	1.34767	0.967231	0.910293	0.927852	0.64951	0.736843	0.68223	1	1.2851	1.27592	1.1635	0.921511	0.703422	0.84243	1.04057	0.860405	1.11783	1
AVL9	0.836093	0.805429	0.886819	1.63105	1.65988	1.79174	0.786007	0.903153	0.537201	1	0.517167	0.728983	0.691539	1.76964	1.65447	2.03334	0.751985	0.978238	0.551243	1	0.650734	0.746006	0.745361	1.81389	1.58496	1.7902	0.702144	0.871968	0.619613	1
AZGP1	0.794435	0.679139	0.586276	1.3198	1.21894	1.09914	2.95061	2.09307	2.79748	1	0.565375	0.696149	0.733189	1.19807	1.11443	1.14723	1.96729	1.4998	11.9912	1	0.906275	0.887003	0.870455	1.36565	1.19298	1.32655	1.52842	1.78696	1.96817	1
AZI2	1.06115	1.09916	1.29553	0.824926	0.814267	0.852279	0.561653	0.709361	0.83355	1	1.28159	1.65242	1.53927	1.03844	0.936682	0.935946	0.480148	0.524945	0.940305	1	1.25225	1.27602	1.32416	1.07219	0.661127	1.08877	1.2185	0.961797	1.82992	1
B2M	0.371197	0.367216	0.438476	1.78027	1.63734	1.52761	0.923549	0.798461	0.708885	1	0.431475	0.418168	0.423107	1.81477	1.57378	1.81398	0.640882	0.784762	1.58537	1	0.554005	0.531219	0.60494	2.14741	1.8186	2.17637	0.999812	1.07032	0.766825	1
B3GALT6	0.227406	0.199418	0.249487	1.81475	1.86265	2.34834	1.60933	2.21337	2.01917	1	0.195607	0.425829	0.156098	2.06315	2.05902	2.43214	2.96972	2.41016	2.03619	1	0.256292	0.231222	0.193872	1.2193	1.23633	1.36804	2.41197	1.97263	2.63547	1
B3GAT3	0.286823	0.310409	0.333005	2.00199	1.88556	2.08961	0.933896	1.24872	1.23518	1	0.415276	0.442367	0.424491	1.85144	1.74337	1.96952	1.00858	1.13168	0.92324	1	0.543819	0.542068	0.575116	1.63549	1.56971	1.68159	0.901218	1.03148	0.909082	1
B3GLCT	0.579951	0.555796	0.508766	2.07694	2.19963	2.00343	1.09745	0.977673	0.542049	1	0.482493	0.510091	0.509078	2.41253	2.12759	2.60641	0.810277	1.04957	0.736107	1	0.385948	0.421882	0.415816	2.12065	2.13571	2.4609	1.03777	0.945105	0.837428	1
B4GALT1	0.833512	0.844814	0.903365	2.27535	2.10498	2.06321	1.17936	0.961414	0.58081	1	0.511479	0.584992	0.494765	1.98293	2.1688	2.09638	0.945701	0.804297	5.63454	1	0.540576	0.449813	0.485664	1.96059	2.21496	2.14755	1.24895	1.07307	0.898225	1
B4GALT3	0.418225	0.387344	0.454403	2.73682	2.26774	2.69962	0.94584	1.19227	0.741941	1	0.378905	0.330767	0.329156	1.86872	1.72188	2.21737	0.822135	0.936418	1.18615	1	0.511998	0.666105	0.755085	1.62335	1.65847	1.63937	2.3584	1.63971	2.26296	1
B4GALT7	0.466533	0.382912	0.470874	1.62911	1.64506	1.76695	1.54182	1.64017	2.76989	1	1.8166	1.8853	0.945887	2.54475	3.22651	2.46124	4.70832	3.18029	4.04265	1	0.394482	0.370307	0.246218	1.23246	1.31765	1.48685	1.78328	0.986136	2.04888	1
BABAM1	1.44414	1.35664	1.31639	0.65514	0.6484	0.722222	1.25889	1.39371	1.5893	1	1.32395	1.3928	1.26242	0.674811	0.646437	0.569431	1.78374	1.64645	1.49275	1	1.4	1.46344	1.29963	0.704376	0.722869	0.671689	1.44724	1.12049	1.62813	1
BACH1	0.720819	0.722158	0.738251	0.999896	0.853702	1.05501	1.62702	2.12649	2.13899	1	0.891528	0.954136	1.1129	0.680733	0.713296	0.599992	2.05982	1.70051	2.2994	1	1.24182	1.39247	1.28963	0.782663	0.728339	0.707254	1.51674	1.22957	1.26938	1
BACH2	0.828375	0.852189	0.823317	0.797044	0.706674	0.749016	2.1202	2.43363	2.80537	1	0.740475	0.652146	0.87257	0.582487	0.642553	0.597701	2.0824	2.21158	2.16853	1	0.91612	0.971894	1.25362	0.792019	0.909235	0.836777	2.20041	1.96954	2.35831	1
BAD	0.265571	0.28346	0.292017	2.2755	2.38404	2.24124	0.928951	0.88036	0.579776	1	0.348789	0.372126	0.363664	1.94773	1.86454	2.16015	0.792562	0.889717	0.559281	1	0.423995	0.488923	0.615672	1.68105	1.70534	1.9401	0.965984	0.868592	0.917516	1
BAG1	1.04461	1.06307	1.01914	1.06235	1.22056	1.15507	1.06038	1.20467	1.29923	1	0.989454	0.968982	0.999474	0.956845	1.03266	1.04053	1.7269	1.61631	1.44139	1	1.18531	1.16437	1.19563	0.961822	0.951943	0.838501	1.44076	1.50032	1.81676	1
BAG2	0.666703	0.640345	0.640714	1.66904	1.56074	1.8604	0.825676	1.01639	0.725076	1	0.553993	0.512814	0.53999	1.693	1.50131	1.84229	1.03167	1.05184	0.71887	1	0.678428	0.702884	0.653908	1.70657	1.65639	1.84387	1.26416	1.09792	0.960124	1
BAG3	1.58122	1.57247	1.75504	0.978266	0.902242	0.843773	0.652016	0.710029	0.732355	1	1.30315	1.3876	1.45589	0.833788	0.80666	0.731567	0.500217	0.478875	1.65069	1	1.31594	1.31994	1.42601	0.812804	0.775918	0.68503	0.551883	0.581006	0.602243	1
BAG4	1.15045	1.09191	1.10911	1.00472	0.971402	1.06674	0.853056	1.04044	1.05517	1	1.17471	1.11922	1.18421	1.09933	1.12945	1.20136	0.941295	0.919781	0.803865	1	1.11875	1.20059	1.10222	1.06626	1.11453	1.35045	0.934453	0.783009	0.443541	1
BAG5	1.2555	1.21228	1.25254	0.731906	0.707623	0.738293	1.22349	1.20932	1.28516	1	1.27263	1.34141	1.27968	0.716915	0.740405	0.678917	1.00532	1.06791	0.986659	1	1.30968	1.42596	1.41449	0.822874	0.795222	0.766391	0.921583	0.812961	0.881632	1
BAG6	1.58446	1.4368	1.37062	1.00006	0.976678	0.961672	0.706408	0.78698	0.752744	1	1.45058	1.43804	1.50394	0.983055	0.933204	0.925065	1.0632	0.868214	1.13775	1	1.17999	1.20931	1.2694	0.915701	0.863476	0.941261	0.852041	0.870798	0.692317	1
BAHD1	0.751237	0.726345	0.673161	1.26433	1.31988	1.2498	1.3209	1.3949	1.48124	1	0.664375	0.628531	0.642226	1.44417	1.53539	1.60307	1.61206	1.54517	1.36388	1	0.903746	0.852233	0.695498	1.26259	1.43061	1.47399	1.8336	1.75018	1.88988	1
BAK1	0.399846	0.412497	0.426067	1.93128	1.78512	1.84294	1.01517	1.01893	0.928533	1	0.367004	0.450819	0.431393	2.42099	2.10872	2.85679	0.936945	1.07351	0.755504	1	0.657245	0.616957	0.572608	1.71158	1.6657	1.89236	1.57647	1.37065	1.24208	1
BANF1	1.26377	1.30222	1.25741	0.801705	0.843052	0.720153	1.10153	1.3078	1.45688	1	1.40476	1.46238	1.36878	0.845926	0.859871	0.738192	2.08511	1.74698	1.60105	1	1.33253	1.31811	1.28295	0.665321	0.631914	0.631782	1.80692	1.6887	1.81038	1
BANP	0.623316	0.579872	0.635935	0.441559	0.484642	0.456257	3.14672	4.2132	5.19106	1	0.41596	0.417355	0.37474	0.649812	0.601681	0.629475	4.45247	4.55027	3.917	1	0.386409	0.489001	0.479394	0.583424	0.567641	0.536561	5.04983	3.57878	4.30426	1
BAP1	0.71424	0.728059	0.662382	1.28578	1.30485	1.48609	0.924188	1.49673	1.95506	1	0.585799	0.439899	0.609794	1.70893	1.53192	1.6492	2.36855	2.08394	2.57514	1	0.589303	0.516575	0.440107	1.35754	1.54141	1.59065	2.32856	1.72758	2.85754	1
BASP1	0.472591	0.460029	0.432896	1.19111	1.19169	0.946975	0.827444	0.569854	0.705259	1	1.16699	1.22652	1.1343	2.81906	2.77764	2.70388	1.31374	1.11142	2.14729	1	0.40423	0.451297	0.442023	0.836396	0.90182	1.05225	0.372041	0.398974	0.437639	1
BAX	1.29685	1.29553	1.21792	1.12307	1.05919	1.10498	0.552723	0.682841	0.42373	1	1.2764	1.33369	1.33325	1.21708	1.22946	1.211	0.46126	0.489029	0.418998	1	1.18353	1.25283	1.29877	1.3067	1.27676	1.34441	0.621648	0.712538	0.69944	1
BAZ1A	0.291892	0.284568	0.266736	0.398823	0.395463	0.366346	4.72224	4.65455	5.55752	1	0.360373	0.371598	0.343596	0.415073	0.40144	0.399292	5.27942	4.21491	5.20847	1	0.257656	0.273209	0.270063	0.511782	0.569403	0.616312	5.10471	4.73269	7.77888	1
BAZ1B	0.282856	0.273361	0.314049	0.389414	0.463854	0.449055	5.14466	4.46218	5.44057	1	0.307239	0.30258	0.315215	0.403466	0.485078	0.430141	5.84917	4.59073	4.9604	1	0.310759	0.293371	0.275084	0.42337	0.484838	0.459814	4.98696	4.33993	7.48169	1
BAZ2A	0.460997	0.459832	0.506123	0.494885	0.550444	0.540822	4.49159	3.4819	4.59278	1	0.431808	0.410178	0.45769	0.896467	0.811552	0.685391	4.5961	3.58314	4.26526	1	0.470097	0.507106	0.396059	0.645848	0.562881	0.766699	4.37885	3.73181	7.48965	1
BBC3	0.303348	0.2938	0.288884	2.11688	2.00309	2.30022	0.660648	0.898103	0.561377	1	0.708622	0.60162	0.584408	1.71102	1.59426	1.68479	0.71085	0.64354	0.568253	1	0.538506	0.857496	0.598212	1.8987	1.70314	1.61075	0.898	0.731152	0.674753	1
BBS2	0.980375	0.969225	1.00155	1.35088	0.996502	1.12666	0.958415	1.23386	1.09654	1	1.48428	1.58494	1.62305	0.683636	0.568499	0.562961	0.40528	0.215403	0.209559	1	2.44115	2.50278	2.41919	0.729226	0.652077	0.555326	0.397774	0.329321	0.264447	1
BBS9	1.15041	1.0362	1.1583	1.23883	1.40097	1.44673	1.3747	1.59444	1.74698	1	1.53206	1.70917	1.5657	0.824936	0.719944	0.749667	0.512878	0.919398	0.638492	1	1.4726	1.42779	1.47141	1.01905	0.810732	0.801	0.943641	0.820285	1.11623	1
BBX	0.408611	0.373061	0.392346	1.17661	1.08425	1.16535	2.33386	3.11709	3.04491	1	0.407861	0.36064	0.409277	1.09142	1.07367	1.25312	3.49878	3.08431	3.06677	1	0.438244	0.50005	0.501377	1.22847	1.33693	1.47253	2.62489	2.38404	2.96597	1
BCAP29	0.273289	0.259457	0.293556	1.97097	1.86551	2.21556	0.994893	1.05429	0.81705	1	0.276238	0.305298	0.329942	2.23037	1.97967	2.55709	0.923278	1.0981	0.926908	1	0.309425	0.344887	0.313246	2.42575	2.24019	2.47403	1.05601	1.12877	0.87929	1
BCAP31	0.308985	0.311528	0.314346	2.01176	1.87134	2.17198	0.955132	0.998758	0.739031	1	0.26115	0.251896	0.262343	2.30224	2.14794	2.73051	0.76035	0.982203	0.586983	1	0.305407	0.300746	0.299106	2.18148	2.34738	2.65523	0.899241	0.9498	0.540384	1
BCAS2	0.379336	0.365984	0.359664	0.649584	0.70527	0.806403	2.58835	3.61409	3.97202	1	0.337896	0.368622	0.377661	0.686272	0.691465	0.816201	4.55579	4.0323	4.12725	1	0.413604	0.456921	0.476339	0.755211	0.895948	0.822832	4.68311	4.06927	4.35551	1
BCAS3	1.36257	1.30305	1.31915	0.976037	0.88419	0.968309	0.750879	0.724503	0.836559	1	1.46497	1.46808	1.47055	1.01713	0.852664	0.940464	0.632491	0.656925	0.631737	1	1.28314	1.38984	1.39908	0.885494	0.924948	0.854645	1.02389	1.04416	1.08936	1
BCAT2	0.405998	0.463301	0.446072	2.25609	2.25491	2.3574	1.08005	1.05248	0.726534	1	0.454301	0.433904	0.460708	2.24514	1.94497	2.39832	0.994771	1.09085	1.11627	1	0.341631	0.323174	0.335724	1.62632	1.59368	1.83057	0.792487	0.883189	0.7617	1
BCCIP	1.21551	1.24641	1.26918	1.07359	1.09121	0.938947	0.847518	0.83682	0.901958	1	1.27198	1.18791	1.18675	1.03876	1.10686	1.07945	1.03818	1.03861	0.867054	1	1.10725	1.1196	1.12154	1.01132	1.01252	1.08514	0.845541	0.84629	0.894949	1
BCKDHB	0.341831	0.314707	0.410387	2.2027	2.17258	2.09353	1.08352	0.985819	0.804942	1	0.353668	0.343989	0.373719	2.35021	2.19831	2.65144	0.901276	1.06387	0.702846	1	0.410873	0.420669	0.422783	1.9425	1.97558	2.14343	1.26874	1.18575	1.19465	1
BCKDK	0.404844	0.388609	0.407197	2.02516	1.83928	1.96844	1.84374	1.74013	1.92278	1	0.497066	0.491223	0.403058	1.84052	1.72511	1.97711	2.09037	1.65463	1.33905	1	0.25048	0.258481	0.259301	1.65958	1.64083	1.76858	1.83769	1.74626	2.08358	1
BCL10	1.89133	1.70284	1.70585	0.74638	0.680562	0.648381	0.416784	0.456465	0.482485	1	1.8032	1.68457	1.61235	0.796115	0.780918	0.798429	0.405793	0.460906	0.601845	1	1.53696	1.61261	1.50772	0.690291	0.665469	0.750415	0.312334	0.421996	0.330714	1
BCL11B	0.256539	0.273464	0.289058	0.359316	0.357692	0.371415	3.5415	5.42838	6.46934	1	0.232543	0.295887	0.231085	0.383257	0.404342	0.412161	5.26131	5.07303	4.35132	1	0.239422	0.266666	0.267522	0.50327	0.514146	0.523447	5.05317	4.35638	6.19794	1
BCL2	0.446219	0.455705	0.544235	1.91525	1.54744	2.21487	1.05072	1.33334	0.569045	1	0.404218	0.41593	0.508635	1.65558	1.36333	1.52396	0.569955	0.622638	0.385425	1	0.512555	0.554267	0.507185	1.73116	1.37092	1.67447	0.683566	0.897181	0.711889	1
BCL2L11	0.481572	0.450402	0.484931	1.35009	1.39724	1.6503	1.21359	1.27427	1.24778	1	0.563864	0.517157	0.522333	1.32211	1.17571	1.29998	1.78471	1.49563	1.65919	1	0.903686	0.636669	0.606734	1.879	1.60761	1.97659	1.13349	1.18131	0.944459	1
BCL2L13	0.337816	0.280419	0.351522	2.0536	1.84527	2.2327	0.843263	0.800488	0.690347	1	0.238202	0.258644	0.302981	2.04272	1.73685	2.35846	0.593449	0.791203	0.541204	1	0.273088	0.298102	0.323071	2.20907	2.15396	2.6441	0.851091	1.08533	0.572004	1
BCL3	1.34804	0.95292	1.13811	0.730329	0.682117	0.592112	1.84885	1.83782	2.56967	1	0.900078	0.918367	1.09743	1.03405	1.35144	1.28977	3.36708	2.35076	1.88428	1	1.30195	1.06266	1.11672	1.41212	1.29292	1.1676	1.49749	2.0252	2.47037	1
BCL7C	0.572848	0.580895	0.579887	1.03507	1.05146	0.987528	1.7461	2.43573	2.87636	1	0.689342	0.708221	0.707949	0.98342	0.960904	0.97889	2.07708	1.93599	1.8287	1	0.906373	0.889015	0.957665	1.1612	1.33264	1.3576	2.12652	1.66412	2.45138	1
BCL9	0.907084	0.948257	0.877991	1.47524	1.29744	1.37304	0.836298	0.848721	0.705306	1	0.656115	0.782206	0.834543	1.61305	1.43997	1.77139	1.08476	0.829738	1.38382	1	0.752439	0.812856	0.724342	1.04374	1.09879	1.14036	0.833774	0.737604	0.660921	1
BCL9L	0.758337	0.750687	0.741859	1.51286	1.37213	1.59791	0.74359	0.898822	0.787408	1	0.694243	0.664231	0.721734	1.63765	1.55915	1.78039	0.769534	0.830391	0.560434	1	0.643482	0.741709	0.81486	1.72918	1.75807	1.84272	0.83048	0.831761	0.489904	1
BCLAF1	0.267052	0.268271	0.298922	1.0296	1.17657	1.21536	3.19285	2.98909	3.27982	1	0.240862	0.252414	0.238666	1.02453	1.03937	1.20014	4.16656	3.35297	3.09529	1	0.28418	0.276201	0.270626	1.22042	1.37796	1.31851	3.33546	2.91835	4.43653	1
BCR	1.4064	1.44795	1.43907	0.738352	0.692684	0.693201	0.560348	0.511235	0.569285	1	1.49024	1.5944	1.52189	0.809409	0.804949	0.63639	0.575011	0.511709	0.654238	1	1.63733	1.47955	1.68593	0.80515	0.764535	0.724553	0.809487	0.833858	0.783913	1
BCS1L	0.245457	0.224722	0.320802	2.12306	1.93935	2.47477	0.780933	0.935646	0.458754	1	0.140915	0.115273	0.165878	2.17405	2.02718	2.51047	0.548386	1.01339	0.882949	1	0.35505	0.348353	0.390929	2.17408	2.15857	2.23354	1.45601	1.26726	0.791199	1
BDH1	0.249221	0.268484	0.283957	1.93434	1.8237	2.07068	0.801586	0.951881	0.575337	1	0.341843	0.298423	0.334576	1.63202	1.39515	1.92926	0.434372	0.637214	0.376945	1	0.300029	0.314481	0.376358	2.19018	2.29926	2.40275	0.771146	0.882648	0.451103	1
BDH2	1.68042	1.75216	1.71982	0.657496	0.596939	0.538242	0.684277	0.590416	0.594146	1	1.71618	1.98523	1.81448	0.903895	0.823671	0.636585	0.527136	0.559599	0.551741	1	1.5219	1.66377	1.56188	0.632403	0.63486	0.600992	0.771042	0.766347	0.677927	1
BECN1	1.05388	1.08309	1.14797	1.1467	1.12448	1.25972	0.584781	0.626521	0.485907	1	1.29294	1.23264	1.39311	1.26377	1.10716	1.20699	0.491856	0.748677	0.471789	1	1.14291	1.29525	1.29168	1.27645	1.23994	1.17409	0.617727	0.706663	0.484981	1
BET1	0.311053	0.337767	0.373953	2.28021	2.15153	2.69463	0.991927	1.09438	0.673294	1	0.2637	0.350136	0.294311	2.56428	2.17649	2.64941	0.942604	0.961335	0.460609	1	0.356966	0.332144	0.323785	2.08403	2.35922	2.36426	0.752253	0.886257	0.561189	1
BET1L	0.272554	0.288134	0.29095	1.97797	1.85742	2.04418	0.865338	1.03959	0.568959	1	0.236293	0.203175	0.235543	2.09525	1.94591	2.34744	1.64732	1.51542	1.07689	1	0.543692	0.557677	0.500918	1.89535	2.09252	2.34454	0.919511	1.04922	0.650676	1
BGN	0.878072	1.03077	0.773294	1.05502	1.54769	1.05579	5.086	2.68081	3.82588	1	1.05565	0.801652	1.05725	1.1597	0.788884	0.94221	0.597741	1.65765	0.476074	1	1.19961	0.916743	1.15495	1.11103	0.704322	1.03465	1.32223	2.94115	1.6705	1
BICD1	0.856229	1.07772	1.00236	1.14988	1.02637	1.11918	1.27927	1.22787	1.32653	1	1.28678	1.17016	0.982482	1.0325	1.3676	1.27237	1.5307	0.538012	1.14318	1	0.901441	1.00053	1.36625	0.80617	1.23951	1.30811	0.715664	0.749141	0.891102	1
BICD2	1.28733	1.25163	1.16031	1.03272	0.985137	1.07879	0.739746	0.76709	0.702045	1	1.264	1.22193	1.22557	1.03297	1.03654	1.18652	0.69663	0.777008	1.15068	1	1.35216	1.48869	1.40752	1.05178	0.985622	0.997785	0.6537	0.728866	0.60362	1
BID	1.50848	1.38051	1.51646	0.650349	0.6844	0.470115	0.574897	0.559178	0.851122	1	1.55277	1.58529	1.52209	0.776578	0.68981	0.489636	0.395148	0.389858	0.511158	1	1.15481	1.3591	1.30147	0.736006	0.699762	0.748366	0.83214	0.700362	0.802642	1
BIN1	1.48472	1.46087	1.54954	0.716983	0.696163	0.604543	0.650276	0.600928	0.693913	1	1.65805	1.67528	1.68624	0.747157	0.742189	0.562018	0.443949	0.454477	0.475383	1	1.66664	1.7396	1.77904	0.703717	0.673762	0.563106	0.544226	0.489748	0.525532	1
BIN2	1.3662	1.42867	1.40188	0.92431	0.867845	0.842575	0.810094	0.74057	0.802967	1	1.60685	1.62919	1.57669	0.934622	0.89398	0.821625	0.5011	0.483505	0.575966	1	1.56855	1.57878	1.56011	0.910721	0.853556	0.749004	0.524123	0.55678	0.527046	1
BIRC3	1.76452	1.77771	1.53594	0.940365	1.12859	0.971579	0.919631	0.644893	0.899559	1	1.42932	1.39647	1.41621	0.696709	0.823151	0.776868	0.678372	0.629561	0.866789	1	1.20517	1.11323	1.4917	0.555971	0.557438	0.462002	0.396351	0.544694	0.646755	1
BIRC6	1.6875	1.72845	1.71036	0.732909	0.686097	0.65841	0.719866	0.638897	0.737078	1	1.59853	1.59216	1.59959	0.849227	0.793332	0.740403	0.692643	0.759965	0.852131	1	1.52525	1.45644	1.48943	0.719962	0.726643	0.633533	0.661934	0.665414	0.931632	1
BLM	0.732096	0.696357	0.663886	1.37754	1.32168	1.3705	1.37219	1.45837	1.60696	1	0.67735	0.634969	0.629654	1.59173	1.30008	1.72705	1.39924	1.6689	1.33032	1	0.653619	0.682052	0.711362	1.79716	1.78057	2.02775	1.8665	2.02606	2.02741	1
BLMH	1.25283	1.25494	1.30499	0.770228	0.791315	0.638039	0.688496	0.729948	0.906062	1	1.70217	1.77329	1.73976	0.800887	0.823179	0.671944	0.522142	0.582018	0.799161	1	1.87627	1.81758	1.88727	0.797	0.69462	0.622546	0.603973	0.628273	0.758512	1
BLOC1S1	1.07649	1.09609	1.09213	1.19454	1.15865	1.21029	1.2123	1.04843	1.21857	1	1.2749	1.31303	1.37118	1.31461	1.00925	1.10813	0.510922	0.609529	0.674141	1	1.1045	1.15263	1.33334	1.30312	1.25353	1.21265	0.861372	0.792173	0.8893	1
BLOC1S2	1.10345	1.08957	1.10534	1.20933	1.20627	1.27861	0.740463	0.66183	0.597677	1	1.03135	1.1003	1.09804	1.23127	1.19657	1.22419	0.389126	0.521647	0.263645	1	1.07977	1.13874	1.03388	1.2639	1.31537	1.43286	0.659006	0.647669	0.414281	1
BLOC1S3	1.43773	1.37659	1.41329	1.09588	1.01447	1.00765	0.858568	0.672393	0.493036	1	1.5193	1.4364	1.51405	0.988468	1.09747	0.987234	0.683179	0.514324	0.788559	1	1.25855	1.31494	1.33757	1.04164	0.895347	1.00699	0.548136	0.554413	0.579501	1
BLOC1S4	1.31366	1.34261	1.31209	0.840707	0.694737	0.715476	0.916044	0.887867	0.779767	1	1.16262	1.28493	1.19926	0.810591	0.79952	0.811294	0.891264	0.706923	1.12062	1	1.30109	1.35148	1.30606	0.912589	0.830946	0.952651	1.91245	1.70389	2.54001	1
BLOC1S6	1.24435	1.30593	1.22606	1.11285	0.954755	0.826264	0.717411	0.835599	0.642317	1	1.21442	1.16857	1.13422	0.906618	0.944858	0.935069	0.593924	0.648094	0.906298	1	1.36009	1.4563	1.3803	0.926694	0.878976	0.822316	0.686939	0.695541	0.604314	1
BLVRA	1.77684	1.81078	1.66408	0.735092	0.696749	0.563072	0.410971	0.429353	0.420239	1	1.71382	1.84942	1.72452	0.607905	0.584383	0.450925	0.397188	0.372128	0.412269	1	1.99695	2.08565	1.88934	0.693945	0.604136	0.498649	0.483555	0.54265	0.470925	1
BLVRB	1.41982	1.6076	1.48562	0.558138	0.590915	0.469258	0.49572	0.623655	0.552309	1	1.62768	1.58302	1.65981	0.678847	0.763008	0.57051	0.58705	0.601962	0.834748	1	1.41169	1.47801	1.534	0.628164	0.608682	0.52911	0.533192	0.772824	0.635664	1
BMS1	0.239175	0.241174	0.281353	0.522059	0.666849	0.64721	4.55929	2.83526	4.05736	1	0.359742	0.297275	0.290149	0.697626	0.792945	0.786622	3.61067	3.29787	3.32994	1	0.356725	0.337371	0.339492	0.803556	0.933948	0.910275	3.37556	3.41981	5.26287	1
BNIP1	0.274511	0.286687	0.299467	2.06568	1.85768	2.30502	0.9616	1.19596	0.935107	1	0.287443	0.235058	0.254919	2.11728	2.09396	2.57446	0.633436	0.874653	0.487601	1	0.365491	0.361202	0.336787	2.18672	2.24409	2.4336	0.90871	0.954474	0.534025	1
BNIP2	1.57744	1.61216	1.76058	0.679432	0.66824	0.543766	0.336372	0.352762	0.353676	1	1.451	1.54383	1.50363	0.895695	0.815595	0.631519	0.538633	0.59883	0.571555	1	1.81548	1.88559	1.88445	0.785071	0.674457	0.648902	0.296952	0.443603	0.244066	1
BNIP3	0.246583	0.234178	0.269476	2.23013	2.20596	2.58013	1.04839	1.02696	0.581142	1	0.414588	0.387438	0.395429	1.9707	1.8395	2.04864	1.10686	1.31915	0.964516	1	0.374837	0.390373	0.414746	1.7729	1.76892	2.26874	1.16041	0.995465	1.43784	1
BNIP3L	0.323876	0.248529	0.329096	1.99153	1.50884	1.81868	1.26447	1.05359	1.00555	1	0.320321	0.274661	0.341654	2.11031	1.87376	2.23589	0.747149	0.921841	0.642236	1	0.528442	0.57222	0.397856	1.70991	1.78228	2.03916	1.73721	1.716	1.40092	1
BOD1	0.638213	0.686238	0.749931	1.40227	1.35655	1.59323	1.19571	1.6252	1.49341	1	0.484212	0.37273	0.441166	1.98822	2.02399	2.02074	1.42528	1.64166	1.20568	1	0.547549	0.555921	0.591555	1.52683	1.8296	1.61108	1.48379	1.57706	1.12832	1
BOD1L1	0.32629	0.32897	0.313565	0.905322	0.928549	1.08952	2.62373	3.22869	3.75609	1	0.323987	0.280711	0.323121	0.924704	0.99928	1.17194	3.40559	3.1248	3.00495	1	0.368451	0.393402	0.411069	1.27935	1.44008	1.56801	2.94446	2.24053	2.70394	1
BOLA1	0.890568	0.877127	0.844698	1.03331	1.02938	1.02057	1.34987	1.33851	1.67279	1	1.14483	1.1754	1.24458	1.0529	1.10685	1.16683	0.331724	0.584025	0.379815	1	1.26659	1.30842	1.31191	1.20983	1.14845	1.23014	0.362872	0.535178	0.383653	1
BOLA3	0.27415	0.289726	0.365885	2.47893	2.34165	2.25974	1.07334	1.01403	0.582558	1	0.333948	0.314089	0.276436	2.51634	2.04141	2.92884	0.507569	0.758917	0.394465	1	0.23205	0.261663	0.254236	2.07388	2.09902	2.49605	0.885049	1.11721	0.574012	1
BOP1	0.361632	0.367401	0.397734	0.972618	0.978305	1.05135	3.0149	2.63261	3.09082	1	0.546741	0.482554	0.506223	1.00955	0.998717	1.11221	3.05232	2.82357	2.53568	1	0.560435	0.598184	0.600346	1.06114	1.09982	1.07624	2.56915	2.44065	3.63719	1
BORCS5	0.891297	0.85086	0.831098	1.54218	1.46059	1.51498	0.798692	0.96767	0.886106	1	0.874815	0.914097	0.844637	1.45363	1.4234	1.61321	0.658873	0.834292	0.547977	1	0.92089	1.00227	0.96542	1.53781	1.65519	1.72351	1.01714	0.985271	0.985293	1
BORCS6	0.722799	0.734052	0.715126	1.2781	1.32251	1.42084	0.652816	0.711733	0.747233	1	0.871265	0.776796	0.818177	1.39337	1.4345	1.67804	0.792872	1.057	0.884653	1	0.95155	0.941132	0.93323	1.44698	1.56012	1.75494	0.92941	0.992398	0.872339	1
BPGM	1.55885	1.59174	1.62968	0.635259	0.648866	0.502234	0.488214	0.44592	0.465882	1	1.40335	1.38611	1.46377	0.582376	0.596459	0.549892	0.7535	0.636348	0.360108	1	1.56551	1.70015	1.60229	0.766153	0.595387	0.669491	0.561221	0.781389	0.679496	1
BPHL	0.462588	0.438331	0.423952	1.99275	2.01639	1.94093	1.15165	0.967556	0.700858	1	0.275334	0.325813	0.347103	2.44003	2.13295	2.63859	0.87096	0.957927	0.709243	1	0.442698	0.460719	0.438506	2.45275	2.4144	2.63491	1.00627	1.01203	0.805231	1
BPNT1	1.43732	1.58723	1.54991	0.873951	0.864104	0.740689	0.487539	0.449491	0.437764	1	1.50842	1.51359	1.5463	0.885962	0.89378	0.747694	0.495356	0.610061	0.553651	1	1.66036	1.68945	1.61059	0.753637	0.637549	0.5871	0.355229	0.429106	0.326352	1
BPTF	0.36361	0.370903	0.404038	0.454119	0.489396	0.494238	4.93781	4.03155	5.04842	1	0.274427	0.250719	0.308091	0.461472	0.485262	0.528449	4.99262	4.51933	4.13375	1	0.400653	0.378137	0.362587	0.578183	0.58835	0.634177	4.67588	3.9515	6.73365	1
BRAF	1.35246	1.10861	1.62706	0.922715	0.831743	0.895502	1.16878	1.26504	1.31412	1	1.54896	1.6801	1.66611	0.776763	0.826798	0.696504	0.345998	0.364783	0.508816	1	1.79518	1.45926	1.59878	0.719502	0.812444	0.630654	0.504627	0.409885	0.783665	1
BRAP	1.62795	1.61417	1.5491	0.748821	0.735358	0.715322	0.667734	0.592822	0.832504	1	1.63748	1.75623	1.55016	0.888742	0.874934	0.693184	0.556761	0.649899	0.700382	1	1.52925	1.52656	1.5041	0.675781	0.625825	0.558569	0.514132	0.529902	0.480916	1
BRAT1	1.17593	1.23218	1.08954	1.17737	1.15344	1.17537	0.480567	0.535138	0.636847	1	1.65017	1.60732	1.54972	0.926571	0.949264	0.996186	0.44165	0.619207	0.40825	1	1.35696	1.17936	1.48927	1.06443	1.04455	1.01807	0.992492	0.960775	1.31149	1
BRCC3	1.46195	1.40325	1.39012	0.886689	0.792081	0.776506	0.999642	1.24385	1.3283	1	1.29789	1.24662	1.29882	0.789015	0.773989	0.773706	1.54818	1.61608	1.56523	1	1.20014	1.22471	1.34948	0.922967	0.84578	0.833654	1.26621	1.31846	1.65197	1
BRD1	0.306851	0.307366	0.29186	0.455492	0.495738	0.483177	3.85587	4.36319	5.17204	1	0.428522	0.415925	0.421307	0.438878	0.560662	0.462903	4.96521	4.30401	4.75519	1	0.412545	0.415586	0.413203	0.440097	0.541713	0.454533	4.50241	3.67456	6.11465	1
BRD2	0.264236	0.272104	0.291483	0.97797	0.966707	1.25723	2.70763	3.14861	3.99117	1	0.260573	0.242796	0.271841	1.02092	1.0192	1.40878	3.92989	3.87493	3.59483	1	0.256266	0.299829	0.360285	1.078	1.18113	1.30674	3.66146	2.92789	4.28712	1
BRD3	0.421979	0.384052	0.519954	1.06125	1.01862	1.1746	2.12212	3.10809	3.07456	1	0.297572	0.266375	0.346461	1.05265	1.10097	1.38198	2.94038	3.15623	3.23723	1	0.379358	0.468717	0.470953	1.29638	1.37077	1.56547	3.38712	2.59227	3.06777	1
BRD4	0.478469	0.471113	0.500242	1.42212	1.34979	1.56923	1.57689	1.96968	1.90679	1	0.300237	0.280094	0.301873	1.63535	1.56003	1.82446	2.00031	2.03768	1.6616	1	0.387289	0.420606	0.409738	1.62019	1.5481	1.80148	1.97328	1.65637	1.64757	1
BRD7	0.358313	0.370677	0.3528	0.599009	0.735779	0.73088	2.60983	3.9924	4.09402	1	0.393401	0.360663	0.364444	0.665901	0.858064	0.772995	4.74693	3.84956	4.11623	1	0.352593	0.34369	0.328937	0.80706	0.932345	0.919306	4.19377	3.53178	4.96967	1
BRD8	0.361578	0.306239	0.338588	0.565274	0.595495	0.681565	3.25334	3.75857	4.64777	1	0.284803	0.268916	0.289545	0.746903	0.711233	0.762881	4.46044	3.62301	3.06972	1	0.476115	0.538767	0.474867	0.935424	0.961411	1.07066	3.17756	2.38301	3.51703	1
BRD9	0.317661	0.324074	0.317309	0.956406	0.976854	1.15381	2.33275	2.74107	3.25564	1	0.4293	0.461374	0.476161	1.12796	1.10028	1.19271	3.23401	2.48488	2.73287	1	0.337684	0.39997	0.384825	1.33028	1.40835	1.40399	2.98564	2.5834	3.12083	1
BRE	1.29451	1.23474	1.23221	0.825339	0.791754	0.780502	1.36379	1.3512	1.59062	1	1.31004	1.39383	1.34929	0.781993	0.802106	0.775489	1.78114	1.83828	1.61926	1	1.33811	1.31277	1.36408	0.767952	0.763542	0.682405	1.59412	1.45844	1.99831	1
BRF1	0.845365	0.876008	0.792327	1.03543	1.22019	1.11364	1.41236	1.45187	1.6025	1	0.657919	0.620297	0.687767	1.18883	1.07186	1.27027	1.29142	1.23009	1.10338	1	0.76252	0.843488	0.961346	1.40731	1.26179	1.38119	1.83097	1.539	1.97766	1
BRI3BP	0.168103	0.148225	0.184281	1.7318	1.41572	1.81093	1.44148	1.45256	1.53354	1	0.0622391	0.0706521	0.0909232	1.95916	1.71806	2.10508	1.79969	1.40769	1.72034	1	0.102236	0.112652	0.144361	2.41943	2.37278	2.9396	1.61512	1.59093	2.0109	1
BRIX1	0.337674	0.354713	0.365674	0.718552	0.728078	0.706149	3.6773	2.68539	3.19934	1	0.429182	0.438728	0.39068	0.860042	0.738276	0.79573	3.71835	3.39635	3.45634	1	0.486434	0.482271	0.494312	0.779843	0.821911	0.809604	3.60807	3.59719	5.61863	1
BRK1	1.45654	1.48011	1.50102	0.860317	0.833416	0.832877	0.533845	0.6066	0.67614	1	1.51124	1.59274	1.56321	0.940917	0.913949	0.854492	0.764329	0.74929	0.880883	1	1.61894	1.51936	1.60128	0.774724	0.751087	0.718732	0.698668	0.733065	0.687466	1
BRMS1	0.259714	0.281875	0.277141	0.928327	0.975504	1.09977	3.26373	3.26204	4.04501	1	0.216935	0.201338	0.223581	1.07167	1.07227	1.23788	3.50934	3.08672	2.74125	1	0.290757	0.307077	0.370426	1.46532	1.60002	1.89728	2.94875	2.68989	3.86558	1
BRMS1L	0.413214	0.440127	0.499248	1.0402	1.07845	1.14904	1.72139	2.2414	2.48762	1	0.332494	0.38171	0.340088	0.995924	0.981853	1.29332	3.7463	3.00029	2.75897	1	0.547206	0.596305	0.641649	1.29602	1.46635	1.49066	2.54379	2.19991	3.0149	1
BROX	1.59345	1.63625	1.61057	0.627298	0.684561	0.56814	0.478266	0.538636	0.565857	1	1.76333	1.88073	1.68203	0.672246	0.6218	0.544474	0.501294	0.527787	0.46771	1	1.59615	1.62951	1.63575	0.701595	0.653809	0.584584	0.602453	0.587864	0.575009	1
BRPF1	0.348116	0.348089	0.359152	0.470856	0.487707	0.479753	4.55495	4.22375	5.27808	1	0.51235	0.461698	0.415501	0.500495	0.506065	0.533653	4.4149	4.61502	3.77649	1	0.391675	0.451336	0.470186	0.546866	0.519329	0.464286	4.65865	4.45671	7.77496	1
BSDC1	0.993055	0.953674	0.881664	1.38785	1.30414	1.42376	0.638707	0.691137	0.478074	1	1.04561	1.1593	1.01331	1.4159	1.24291	1.44335	0.742014	0.787089	0.88941	1	0.970674	1.16537	1.0705	1.48118	1.41932	1.64577	0.494514	0.794381	0.513946	1
BSG	0.407718	0.507416	0.39061	1.77693	1.5442	1.63968	0.96053	1.0986	1.02401	1	0.528821	0.583858	0.636172	1.9038	1.78373	2.14948	0.987848	1.19562	0.992272	1	0.354711	0.371505	0.37819	2.10483	2.12044	2.46373	0.864168	0.978031	0.623806	1
BST2	0.263261	0.299981	0.24426	1.39663	1.5175	1.4911	0.94983	0.934001	0.603291	1	0.606938	0.504155	0.56819	1.70909	1.61373	2.03757	1.09195	0.859227	1.02718	1	0.63911	0.617549	0.568618	1.38296	1.63375	1.56947	1.40982	1.46775	1.40429	1
BTAF1	0.836706	0.797905	0.795048	0.857415	0.854019	0.830082	2.7448	2.13281	2.83966	1	0.708691	0.660961	0.695915	0.847091	0.862647	0.942456	2.91695	2.6454	3.14142	1	0.684594	0.718326	0.71559	0.951437	0.947041	0.93401	3.07663	2.50442	4.13793	1
BTBD11	1.01554	1.03149	0.973719	1.32502	1.20489	1.34306	0.874661	0.82651	0.681747	1	0.965196	1.09147	0.996012	1.24101	1.12965	1.21349	1.14029	1.23485	1.00398	1	1.08392	1.2513	1.25798	1.19389	1.29329	1.05757	0.95556	0.98026	0.93997	1
BTBD2	1.38348	1.4403	1.37469	0.870826	0.772461	0.764506	0.405022	0.36455	0.427073	1	1.6203	1.65325	1.56731	0.832028	0.841176	0.782051	0.617178	0.647343	0.792094	1	1.13278	1.08997	1.17734	1.20674	1.28049	1.44156	1.08829	0.917186	1.06824	1
BTD	0.772814	0.779821	0.693491	1.95237	1.94211	2.08053	2.87275	1.33292	1.45121	1	1.01405	0.776434	1.39883	1.22134	1.45171	1.21884	2.76169	2.26175	4.80569	1	0.884044	1.04585	1.03635	1.66007	1.7079	1.832	0.662989	0.702574	0.443952	1
BTF3	1.7149	1.7345	1.81899	0.832366	0.885195	0.735414	0.803898	0.714919	0.818389	1	1.7948	1.90741	1.79465	0.762745	0.690861	0.638775	0.421207	0.42014	0.457414	1	1.7296	1.75108	1.69102	0.61187	0.579976	0.454042	0.575776	0.383633	0.457377	1
BTF3L4	1.47475	1.51284	1.46746	0.890603	0.83484	0.773397	0.952124	0.872743	1.02132	1	1.61333	1.59659	1.60287	0.752208	0.85568	0.680321	0.672067	0.673535	0.73189	1	1.4404	1.43604	1.38913	0.684946	0.677787	0.640203	0.551058	0.631113	0.855131	1
BTLA	0.381659	0.357984	0.379291	2.33342	2.15672	2.52549	1.41561	1.19718	1.1592	1	0.362913	0.398947	0.428852	1.9321	1.71984	2.22338	1.37465	1.33071	0.941244	1	0.325779	0.383624	0.400322	1.83241	2.04984	2.21724	0.827824	0.819276	0.513706	1
BTN2A1	0.748448	0.848886	0.775915	2.36767	2.40387	2.35406	0.607352	1.21656	0.877799	1	0.645066	0.67183	0.650098	1.64669	1.80581	1.78012	1.40092	1.56111	1.58707	1	0.34622	0.330707	0.412451	1.54962	1.67919	1.66348	0.915334	0.977373	1.14996	1
BTN3A1	0.643266	0.63331	0.663627	1.9417	1.76353	1.98023	1.20214	1.14103	0.971482	1	0.460703	0.511832	0.532504	2.16809	1.97775	2.32785	0.862785	1.10518	0.974156	1	0.713097	0.720196	0.735372	1.84845	1.83932	1.97559	0.969803	1.0431	0.76173	1
BTN3A2	0.382453	0.363652	0.38368	1.95618	1.90979	1.96441	0.976603	0.947227	0.843435	1	0.498927	0.496091	0.522519	1.96362	1.98521	2.17819	0.794015	0.917771	0.627122	1	0.688704	0.783179	0.714804	1.83141	1.80648	1.87432	0.88741	0.872258	0.549966	1
BTN3A3	0.619149	0.660399	0.569739	1.51111	1.25436	1.47807	0.821745	1.05495	1.05014	1	0.304651	0.309808	0.339947	1.61284	1.38124	1.63046	0.608384	0.871495	0.62034	1	0.536094	0.607475	0.591986	2.57926	2.42297	2.82194	1.23978	1.27648	1.06745	1
BUB3	0.672305	0.647675	0.637691	1.30944	1.28303	1.36131	1.50233	1.70939	2.02999	1	0.526823	0.497067	0.541437	1.59653	1.34061	1.7791	1.97089	1.99456	1.69406	1	0.580717	0.618332	0.638451	1.4651	1.46419	1.54464	1.55541	1.4161	1.5144	1
BUD13	0.213419	0.218003	0.211113	0.947311	0.996728	1.05859	2.99439	3.49811	4.46898	1	0.253935	0.243898	0.264522	0.979405	0.878747	1.02286	4.26185	3.74128	3.51638	1	0.403041	0.378628	0.414816	0.921986	1.07436	0.993075	3.72537	3.09984	4.80461	1
BUD31	0.518206	0.501141	0.525677	0.887998	0.917149	0.847689	2.47885	2.59818	3.13844	1	0.429369	0.438266	0.464203	0.867632	0.832263	0.94719	3.80354	2.97245	3.23549	1	0.557349	0.550848	0.525105	0.917324	0.964077	0.940128	2.87283	2.54251	3.31589	1
BYSL	0.53207	0.539035	0.602262	0.485981	0.451603	0.548094	2.88562	3.49903	3.4323	1	0.598182	0.59182	0.691346	0.53935	0.639814	0.616407	3.32	3.18268	3.06924	1	0.751197	0.650148	0.689193	0.569004	0.59033	0.688712	3.83408	3.28648	5.37946	1
BZW1	1.51817	1.53976	1.505	0.752961	0.753302	0.714201	0.580611	0.580556	0.596428	1	1.6228	1.60454	1.58179	0.797186	0.793311	0.67977	0.463811	0.532737	0.685592	1	1.5703	1.48125	1.5628	0.821474	0.775083	0.751495	0.62527	0.658768	0.626663	1
BZW2	1.52701	1.50812	1.56241	0.754476	0.698168	0.700403	0.46176	0.501262	0.464408	1	1.38624	1.38126	1.40788	0.75783	0.711676	0.682931	0.61347	0.552209	0.568675	1	1.3272	1.33246	1.35505	0.729691	0.739352	0.675971	0.865117	0.81779	0.833856	1
C10orf35	0.549545	0.514294	0.543075	1.74427	1.60443	2.33112	0.930314	0.927651	0.722506	1	0.766368	0.72065	0.628072	1.37102	1.50873	1.65807	0.946381	0.886552	0.497818	1	0.794365	0.806637	0.743024	1.43587	1.45358	1.47662	0.640448	0.802109	0.627451	1
C10orf54	0.422849	0.428468	0.413956	1.94523	1.77836	2.1655	1.08758	1.10563	1.77745	1	0.367472	0.432292	0.455436	2.16033	2.03614	2.209	0.892076	0.860359	0.705204	1	0.385889	0.385229	0.439419	2.16206	2.08596	2.34409	0.763562	0.801317	0.382915	1
C10orf76	1.55157	1.62089	1.46161	0.839405	0.792661	0.68161	0.649387	0.716931	0.654984	1	1.69809	1.66388	1.66909	0.791414	0.798641	0.627395	0.324573	0.464344	0.553173	1	1.47096	1.59444	1.64341	0.918433	0.874083	0.805017	0.707389	0.673915	0.664452	1
C11orf31	0.689039	0.725485	0.686639	1.15457	1.14654	1.09358	2.55273	2.38897	3.21164	1	0.550014	0.505637	0.550195	0.963136	1.04897	1.09905	2.51768	2.27884	2.32986	1	0.5831	0.604433	0.611013	1.12596	1.06975	1.14899	2.30665	1.95425	2.45697	1
C11orf54	1.73831	1.85314	1.83198	0.715444	0.698142	0.544354	0.489734	0.465702	0.594805	1	1.78728	1.75587	1.7285	0.546704	0.576312	0.405906	0.283966	0.277206	0.365115	1	1.8437	2.03387	1.98632	0.569809	0.457026	0.384717	0.412474	0.376509	0.435241	1
C11orf57	0.245342	0.262392	0.228692	0.764676	0.885632	0.992512	1.85201	1.89752	2.30778	1	0.317242	0.274907	0.306971	1.95443	2.07003	2.97646	6.35521	5.4859	5.74446	1	0.336954	0.371055	0.412238	1.1994	1.45164	1.50088	3.90444	3.17654	4.91215	1
C11orf58	1.45763	1.38633	1.33191	0.947244	1.00722	0.908775	0.50763	0.697886	0.594052	1	1.48579	1.42054	1.42806	1.01288	1.16959	1.07093	0.460197	0.476742	0.3249	1	1.39393	1.47946	1.38756	0.999371	0.898537	0.873033	0.418763	0.484728	0.273433	1
C11orf68	1.75766	1.72054	1.68603	0.712241	0.674183	0.603848	0.712687	0.653098	0.719337	1	1.73058	1.7338	1.75233	0.8825	0.79447	0.735832	0.356005	0.425284	0.377089	1	1.66673	1.75106	1.70634	0.618666	0.543396	0.475525	0.302246	0.365245	0.24485	1
C11orf98	0.699646	0.664356	0.750897	1.42691	1.38484	1.51651	1.11134	1.0261	0.942989	1	0.656663	0.627126	0.70848	1.74365	1.57443	1.8075	1.0065	1.22776	0.784671	1	0.678338	0.768259	0.757458	1.65266	1.64968	1.62954	1.23391	1.18995	1.47779	1
C12orf10	1.31065	1.40058	1.34192	0.788501	0.763145	0.756624	0.526864	0.580768	0.708579	1	1.58009	1.49279	1.62841	0.889287	0.864647	0.820184	0.380222	0.424696	0.349217	1	1.5738	1.5562	1.60207	0.860605	0.854552	0.813257	0.60636	0.536465	0.443041	1
C12orf29	1.72481	1.64001	1.54131	0.878905	0.89358	0.72777	0.406606	0.377969	0.274978	1	1.49257	1.64055	1.51101	0.881116	0.971463	0.829814	0.32903	0.487826	0.320432	1	1.50121	1.67152	1.53855	0.929878	0.772414	0.905275	0.331318	0.42065	0.120477	1
C12orf4	1.50641	1.57445	0.983943	0.840632	0.87599	0.845944	1.20774	1.17521	1.67261	1	1.63538	1.54698	1.37929	0.820736	0.665439	0.607549	0.591799	0.543445	0.821252	1	1.43164	1.67884	1.12914	0.772223	0.894542	0.855162	0.530286	0.538644	0.630409	1
C12orf43	0.591846	0.860854	0.644093	0.962742	1.07166	1.05592	1.59387	2.28058	2.84217	1	0.534584	0.500677	0.494359	1.0584	1.2755	1.24662	3.34335	3.05031	2.72502	1	0.489837	0.440392	0.413468	1.22345	1.24825	1.21258	2.90663	2.36071	2.95143	1
C12orf45	0.70519	0.747926	0.725596	1.15366	1.07063	1.12078	0.760639	1.10399	1.20093	1	0.938027	0.941534	1.05976	1.4873	1.19448	1.49029	0.71281	0.799124	0.615918	1	1.23675	1.19687	1.13136	1.04738	1.2577	1.18655	1.04299	0.940826	0.90942	1
C12orf57	1.37648	1.36975	1.52784	0.635819	0.720166	0.709823	1.2746	1.00822	1.22629	1	1.54284	1.90081	1.80145	0.58093	0.682009	0.513758	0.699347	0.737691	1.68741	1	1.43393	1.41756	1.68092	0.487696	0.831221	0.523423	2.12293	1.41365	1.44723	1
C12orf65	0.295655	0.364026	0.337369	1.35522	1.18421	1.40225	3.45932	2.87684	3.49976	1	0.287655	0.358398	0.314124	1.24227	1.13056	1.323	2.96451	3.05926	2.82048	1	0.127617	0.191264	0.135346	1.24371	1.08806	1.25596	3.24683	3.08736	3.69008	1
C12orf66	0.742479	0.733069	0.75966	0.93991	1.10945	1.09364	1.58777	1.53357	1.90759	1	0.767929	0.843658	0.888605	0.953645	0.845405	0.853595	1.40139	1.45208	1.19209	1	0.922833	1.02417	0.941661	1.03904	0.944648	1.06118	1.32464	1.17615	1.72402	1
C12orf73	0.394214	0.398324	0.376137	2.57313	1.95282	2.74239	1.2204	1.66696	1.45251	1	0.622421	0.526295	0.447294	1.80787	1.92329	1.94333	0.62572	0.6666	0.540358	1	0.297001	0.25898	0.339976	1.72643	1.69083	2.04875	1.02678	0.852119	0.572531	1
C12orf75	0.409683	0.415587	0.428964	2.13284	1.85768	2.42373	1.26366	1.1595	0.908884	1	0.565031	0.540389	0.505223	2.51367	2.30853	2.80087	1.11388	1.24703	0.631252	1	0.702564	0.769588	0.68112	1.83554	2.24584	2.23209	1.35106	1.19639	0.758613	1
C14orf1	0.335789	0.342557	0.45132	2.23151	2.06615	2.78026	0.8529	0.961464	0.529819	1	0.631015	0.562029	0.737703	2.27406	2.02498	2.45013	0.587656	0.863803	0.392518	1	0.25948	0.249984	0.248843	2.47591	2.29763	3.40361	0.704915	1.03161	0.365512	1
C14orf142	1.66709	1.47836	1.49331	0.801749	0.88433	0.71432	0.926361	1.16736	0.937419	1	1.59275	1.40748	1.62849	0.917054	0.931349	0.902425	0.586711	0.528667	0.392509	1	1.19162	1.34452	1.36468	0.974591	0.973972	1.09014	0.641949	0.57394	0.582541	1
C14orf159	0.551665	0.621808	0.581012	2.72651	2.81009	3.15939	1.5072	1.479	1.25322	1	0.246118	0.298503	0.284727	2.09397	1.93708	2.37294	0.682627	0.938381	0.578479	1	0.136769	0.0741273	0.0417344	0.15189	0.232898	0.224145	0.111082	0.317959	0.404479	1
C14orf166	1.01184	0.990474	0.954262	1.0798	1.10129	1.19743	0.915498	1.07913	1.13816	1	0.982475	0.888884	0.963712	1.23061	1.3147	1.29219	1.2539	1.2734	1.1419	1	0.927919	0.981439	0.964614	1.35637	1.29364	1.32738	1.42333	1.1738	1.2652	1
C14orf169	0.772136	0.654848	0.650837	1.46828	1.48625	1.64456	1.8385	1.67863	2.13136	1	0.463092	0.428071	0.36451	1.62018	1.69318	1.61945	2.15001	2.32621	2.2747	1	0.44492	0.554954	0.434884	1.20333	1.3751	1.55107	2.23497	2.1096	2.9599	1
C15orf39	0.494153	0.485141	0.579628	1.05939	1.26541	1.13395	1.6448	1.50865	1.82829	1	0.998469	0.75852	0.977676	1.32104	1.51253	1.62972	1.33171	1.71343	2.24115	1	0.594427	0.591922	0.645021	1.56141	1.36657	1.49487	0.874338	1.07764	1.00265	1
C15orf40	1.08513	1.12709	1.10973	1.30166	1.27875	1.13671	0.776392	0.724402	0.483965	1	0.936962	0.921086	0.990385	1.4789	1.4903	1.46836	0.515593	0.576551	0.494182	1	1.07783	1.11619	1.10574	1.35688	1.46934	1.66988	0.625774	0.736937	0.615127	1
C15orf41	1.41094	1.65887	1.48347	0.554145	0.599745	0.502149	0.519418	0.802592	0.839439	1	1.17385	0.956707	0.88364	1.28047	1.34995	1.42038	0.46939	0.596135	0.776034	1	1.57548	1.68328	1.54579	0.865044	0.595775	0.93413	0.349013	0.421331	0.538497	1
C15orf61	0.705206	0.720009	0.882126	2.0517	2.17312	2.24219	1.09821	1.21455	0.975672	1	0.580566	0.469713	0.727264	2.16804	2.09099	2.21438	1.38186	1.06937	1.24104	1	0.422181	0.379516	0.535314	1.88288	2.19585	2.00589	1.40878	1.09379	1.09049	1
C16orf13	1.52874	1.67678	1.57437	0.675421	0.649109	0.618421	0.657332	0.653555	0.720839	1	1.55808	1.54424	1.43768	0.686228	0.69195	0.521813	0.731293	0.680879	0.730921	1	1.47622	1.42461	1.52775	0.664784	0.616625	0.659683	1.18629	0.98183	0.833468	1
C16orf54	0.480263	0.402393	0.505576	1.52164	1.4761	1.74125	0.864325	0.989054	0.685202	1	0.481849	0.471474	0.493394	1.9884	2.30729	2.33431	0.975008	1.12176	0.684626	1	0.583571	0.5373	0.521291	1.50984	2.27637	2.11284	0.661239	1.29018	0.430409	1
C16orf58	0.41544	0.440391	0.440108	1.99316	2.17702	2.27651	0.890224	0.97556	1.03234	1	0.201433	0.212208	0.214144	1.94512	1.77091	2.19157	0.546275	0.894512	0.53053	1	0.415195	0.365165	0.411118	2.20064	2.25705	2.60046	0.997279	1.04617	0.419131	1
C16orf62	1.60143	1.58818	1.54678	0.809961	0.830031	0.767445	0.624708	0.536891	0.545755	1	1.42115	1.43692	1.40445	0.835674	0.799238	0.731448	0.54523	0.579054	0.593594	1	1.55407	1.55144	1.55763	0.777796	0.790059	0.68414	0.704094	0.773452	0.663304	1
C16orf70	1.17834	1.05576	1.24525	0.675121	0.664578	0.634195	0.631262	0.968924	1.06286	1	1.33813	1.32031	1.48009	1.13253	0.894769	0.882856	0.590771	0.740375	0.537533	1	0.815298	0.865253	0.939338	0.519338	0.60788	0.465357	2.67199	2.138	3.63148	1
C16orf91	0.205206	0.20934	0.218019	1.84661	1.79805	1.92518	1.12034	1.18627	0.968042	1	0.14163	0.116863	0.137046	1.95783	1.71003	2.2016	1.15015	1.28679	0.890347	1	0.104644	0.158829	0.180835	2.19021	2.01777	2.43736	1.24293	1.29306	1.22835	1
C17orf49	1.38228	1.34622	1.37393	0.978794	1.17166	1.20196	1.21175	1.39015	1.47172	1	1.20179	1.08352	1.08226	1.179	1.2265	1.28428	1.26275	1.41365	1.00031	1	0.868997	0.891216	0.966366	1.13838	1.18554	1.23238	1.3894	1.23248	1.0255	1
C17orf62	0.566114	0.554298	0.526769	1.85577	1.55208	1.79027	1.42185	1.10068	1.08138	1	0.433913	0.482194	0.398026	2.45501	2.35328	2.71336	0.630494	1.152	0.518575	1	0.394898	0.457324	0.410101	2.01215	1.96073	2.30646	1.21858	1.25309	0.863313	1
C17orf75	1.21958	1.17765	1.24239	1.17634	1.07841	1.12987	0.803762	0.85985	0.681547	1	1.34235	1.38002	1.36375	1.15019	1.20114	1.18717	0.831436	0.786405	0.910436	1	1.35353	1.37809	1.49221	1.11952	1.20577	1.04475	0.747536	0.701476	0.534538	1
C17orf97	0.756725	0.693871	0.727525	0.401224	0.496317	0.460013	0.353279	0.441698	0.513374	1	1.41644	1.53253	1.53593	1.42265	1.38204	1.32516	1.51686	1.22818	1.22637	1	1.75286	1.68382	1.58773	1.28481	1.43791	1.39706	1.2039	1.21594	1.04347	1
C18orf25	1.42787	1.44468	1.25845	0.85713	0.915865	0.836134	0.486309	0.631117	0.517168	1	1.46959	1.32665	1.16098	0.968215	0.998344	0.929925	0.809695	0.878918	0.908854	1	1.29199	1.17163	1.0976	0.994973	0.96142	0.893253	0.494724	0.562684	0.360427	1
C18orf32	0.170836	0.165563	0.166866	1.98907	1.62255	2.26993	0.616332	0.710015	0.298915	1	0.295015	0.300253	0.325149	2.10178	1.85696	2.44396	0.932292	1.13068	0.712808	1	0.286462	0.290237	0.310479	2.60589	2.78455	3.02009	1.01932	1.50617	0.757198	1
C18orf8	1.56973	1.5519	1.52845	0.849572	0.846774	0.851091	0.759698	0.943338	0.55169	1	1.58454	1.69831	1.56838	0.897899	0.84329	0.847828	0.649264	0.731345	0.718784	1	1.56956	1.59105	1.62642	0.889171	0.815204	0.720069	0.564339	0.648107	0.442505	1
C19orf25	0.439148	0.391693	0.429101	1.63181	1.63015	1.93938	0.819152	1.08522	0.72703	1	0.309819	0.358099	0.408964	2.228	1.96952	2.26816	0.801174	0.776468	0.604824	1	0.533204	0.542628	0.474392	2.03966	2.35825	2.38952	1.12983	0.948957	0.828989	1
C19orf43	0.900176	0.873405	0.822999	1.37288	1.3848	1.33961	0.864659	1.06998	1.01071	1	0.816441	0.760844	0.891162	1.49087	1.62021	1.73226	1.08757	1.37383	0.9906	1	0.90429	0.939072	1.02361	1.51214	1.48169	1.59661	1.00249	0.947084	0.80127	1
C19orf47	0.370634	0.281814	0.364976	0.780573	0.793991	0.963087	2.4265	3.32527	3.99227	1	0.209615	0.232073	0.245043	0.666688	0.640099	0.907913	4.76747	3.77586	3.60886	1	0.326625	0.340118	0.366327	0.798767	0.848782	0.726209	4.67748	3.66892	5.52644	1
C19orf52	0.377475	0.443747	0.495083	1.81213	1.83691	2.03804	1.20914	1.30595	1.22755	1	0.462721	0.573352	0.613966	2.76716	2.22669	2.98028	0.634847	0.988786	0.523755	1	0.22713	0.33045	0.353392	1.58925	2.16536	2.25389	0.923154	0.793326	0.557821	1
C19orf53	0.551328	0.522472	0.538574	0.637102	0.73468	0.651266	7.38999	3.76071	6.18685	1	0.505957	0.4694	0.477427	0.749346	0.79992	0.796762	4.44293	3.63462	3.84554	1	0.511385	0.520044	0.52215	0.639879	0.650079	0.657874	3.92028	3.44426	4.70913	1
C19orf66	1.23363	1.26003	1.20294	0.984345	0.930178	0.823046	0.981134	0.984805	1.12983	1	1.38883	1.39171	1.38595	0.893928	0.867243	0.815638	0.864442	0.728948	0.736191	1	1.1941	1.45409	1.24783	0.823412	0.769117	0.80911	0.894449	0.944503	1.14477	1
C19orf70	0.227095	0.231339	0.254418	1.74752	1.57941	1.86622	1.87338	1.90354	1.83519	1	0.197137	0.22445	0.213249	2.23529	1.86581	2.39205	0.955509	0.967145	0.785711	1	0.25575	0.263647	0.305353	1.98535	2.04766	2.33415	1.6258	1.52963	1.39948	1
C1GALT1	0.215767	0.208471	0.249056	2.07977	1.97228	2.25904	1.01318	1.27071	0.726113	1	0.338519	0.300735	0.295963	2.10693	2.06578	2.35865	0.656071	0.762309	0.58456	1	0.249764	0.257985	0.208101	2.13889	2.24233	2.54449	0.833278	0.772393	0.531163	1
C1GALT1C1	0.319181	0.336108	0.272002	2.20326	2.05634	2.23551	1.39214	1.29757	1.24727	1	0.337787	0.326027	0.34024	2.23475	1.79881	2.43109	0.75931	1.00667	2.06269	1	0.318523	0.239213	0.322444	2.01867	2.20872	2.54044	0.838542	0.894917	0.585658	1
C1orf109	1.52919	1.44743	1.51924	0.712589	0.710452	0.741005	0.344806	0.619885	0.429468	1	2.02523	2.05387	2.13824	0.981601	0.888173	0.650482	0.683781	0.829186	0.649703	1	1.36444	1.38485	1.42105	0.977644	0.951899	0.917289	0.762962	0.810595	0.834361	1
C1orf123	1.78645	1.81188	1.87701	0.682736	0.696399	0.518053	0.504314	0.554126	0.656666	1	1.5147	1.52008	1.58436	0.666062	0.716946	0.548962	0.451131	0.457475	0.702353	1	1.65258	1.77813	1.83392	0.571819	0.50899	0.424718	0.534493	0.448853	0.883859	1
C1orf131	0.2369	0.256639	0.248456	0.349676	0.498775	0.320548	4.04588	5.38688	7.55816	1	0.35537	0.333597	0.390467	0.426151	0.69168	0.475292	4.94976	3.91042	4.45302	1	0.387382	0.369028	0.368296	0.358852	0.377981	0.394227	5.22889	4.32642	5.66947	1
C1orf162	0.504375	0.425436	0.53526	3.16237	2.42488	3.07434	1.75237	1.8424	1.12056	1	0.356957	0.388438	0.410203	2.1382	1.67195	2.13908	0.930368	1.02392	0.535646	1	0.286139	0.262886	0.284263	1.80141	1.44426	2.06367	0.765888	0.852245	0.384105	1
C1orf174	0.431528	0.435513	0.342146	0.517784	0.540341	0.477859	2.69606	3.6127	4.75785	1	0.259135	0.253642	0.318826	0.433262	0.555543	0.51268	4.81687	4.75985	4.07306	1	0.468288	0.429117	0.476374	0.822211	0.690883	0.806994	3.984	3.34396	3.37488	1
C1orf198	0.732201	0.837945	0.798985	1.41196	1.35774	1.54426	0.819412	0.865964	1.18346	1	0.658593	0.793025	0.794638	1.57121	1.56518	1.71391	1.03785	0.978486	0.755796	1	0.6666	0.774903	0.768976	1.17767	1.11621	1.29155	1.23041	2.01884	1.81221	1
C1orf21	0.628225	0.897758	0.748209	1.19439	1.1402	1.15616	0.846816	0.906102	0.393585	1	0.570783	0.59121	0.675662	1.57998	1.65712	1.70053	0.861511	0.993564	0.876423	1	1.02677	0.94327	1.00843	1.91485	1.74097	2.02217	1.21679	1.07332	0.761068	1
C1orf27	0.378614	0.369897	0.395835	1.95142	1.85885	2.18825	1.10797	1.00598	0.849601	1	0.286747	0.311003	0.33441	2.12868	1.69747	2.4265	0.627055	0.866439	0.626135	1	0.414058	0.357395	0.411014	1.9232	1.96883	2.18068	0.887144	1.16946	0.850453	1
C1orf35	0.414581	0.365516	0.378393	0.935037	1.11661	1.23829	1.76568	2.3449	2.84439	1	0.427341	0.416598	0.409746	0.996537	1.09058	1.2054	3.28742	3.20347	2.5375	1	0.485395	0.501817	0.43887	0.99212	0.967055	0.959362	3.34289	2.40824	3.15712	1
C1orf50	1.56157	1.76897	1.56918	1.02646	0.996656	0.988993	0.536933	0.586084	0.401333	1	1.5302	1.47944	1.46865	0.895618	1.0187	0.901714	0.671412	0.662405	0.479912	1	1.35766	1.37662	1.44322	0.964419	0.912656	0.822037	0.706489	0.823628	1.21647	1
C1orf52	1.03177	1.07453	1.05267	1.26561	1.18625	1.14316	0.803537	0.827067	0.777638	1	1.05429	1.10096	1.06492	1.17152	1.24371	1.20189	1.02385	0.871206	0.743476	1	1.29121	1.25758	1.14006	1.05386	1.04996	1.16712	0.763971	0.783241	0.729944	1
C1QBP	0.135083	0.151601	0.188163	2.43741	2.38013	2.4203	0.802006	0.857857	0.533768	1	0.143828	0.168295	0.165155	2.41214	2.31256	2.61439	0.673794	0.887118	0.413675	1	0.155275	0.172335	0.178331	2.22872	2.3568	2.74982	0.814917	0.929458	0.454098	1
C1R	0.90077	0.947348	0.865391	1.10686	1.01928	0.857149	4.28624	1.9702	2.73399	1	0.984346	1.3806	0.848281	1.21964	1.06493	0.819352	2.153	2.04528	2.28942	1	1.15738	1.36276	1.19094	1.51703	1.00893	1.05695	2.33256	2.45162	3.26537	1
C1S	0.526117	0.553694	0.814221	1.01672	1.05299	0.948475	4.6105	1.32061	1.29222	1	1.07901	1.08689	0.969573	1.11275	0.934009	1.11819	1.68256	1.60236	4.52008	1	1.0628	0.866792	1.09908	1.09359	1.20577	0.84614	3.12532	2.5351	4.10945	1
C20orf24	0.240279	0.239318	0.269228	1.95737	1.83436	2.11007	0.799998	0.869906	0.6831	1	0.269674	0.250791	0.274301	2.50451	2.30628	2.18805	0.876165	0.887857	0.973204	1	0.74867	0.631936	0.883803	1.95116	2.23646	2.20754	0.749306	0.646986	0.16763	1
C20orf27	1.51563	1.64044	1.58215	0.837133	0.740173	0.665017	0.659786	0.687583	0.65075	1	1.46183	1.496	1.5246	0.85002	0.874839	0.666924	0.594771	0.559087	0.609825	1	1.36212	1.54118	1.72238	0.724372	0.679288	0.674732	0.611863	0.708764	0.639309	1
C2CD2L	0.376269	0.434738	0.333981	1.94834	1.60356	2.23385	1.36962	1.22558	1.18301	1	0.391471	0.314443	0.330829	1.66779	1.5223	1.84569	1.51527	1.39693	1.15515	1	0.349496	0.564159	0.476193	1.90539	1.61609	1.97705	1.04893	1.22296	1.30595	1
C2CD5	1.35588	1.36438	1.32746	0.962255	0.881104	0.851423	0.676329	0.647136	0.592358	1	1.40073	1.42384	1.2769	1.03365	1.00176	0.971381	0.652572	0.718644	0.674299	1	1.28805	1.29756	1.32398	0.988824	0.967096	0.927473	0.783972	0.70499	0.900562	1
C2orf42	0.436554	0.456925	0.406335	0.731078	0.74308	0.834871	3.58668	4.39195	5.08629	1	0.345056	0.302122	0.403422	0.789186	0.768712	1.00944	4.46672	4.16944	3.54988	1	0.546623	0.644473	0.67194	0.649516	0.694671	0.620731	4.47854	2.29005	8.14816	1
C2orf47	0.433037	0.456911	0.497553	1.92099	1.68972	1.99583	1.04452	1.15614	0.970268	1	0.188329	0.217644	0.172468	2.25499	1.93849	2.78012	0.843205	1.09761	0.702928	1	0.179273	0.178157	0.170762	2.12233	2.32164	2.64944	0.896772	0.991236	0.460748	1
C2orf49	0.403194	0.435671	0.443124	1.41866	1.24999	1.71928	1.86864	2.01841	2.03099	1	0.379134	0.329151	0.379912	1.26758	1.18398	1.5419	2.72118	2.62268	2.04918	1	0.336499	0.377948	0.462247	1.71633	1.69537	1.66665	2.82842	2.29567	2.29946	1
C2orf69	0.900743	0.88266	0.903823	1.56643	1.5565	1.32575	0.86748	0.810282	1.02462	1	1.357	1.06628	1.3063	1.68729	1.19919	1.40977	1.45378	1.09629	1.08312	1	1.02621	0.920993	1.71238	1.00512	1.11011	1.18146	1.62564	0.794603	1.04063	1
C3	0.539635	0.838198	0.465629	1.83465	1.82442	1.49927	2.16358	1.05902	2.74216	1	0.840833	0.826698	0.473262	1.30181	1.06067	1.12778	2.33539	1.07424	3.12919	1	0.995349	0.846298	0.598896	1.42591	0.913169	1.19274	2.0951	1.34285	2.71996	1
C3orf38	0.851014	0.81126	0.79031	0.935013	0.950037	0.921483	1.67979	1.51176	1.54089	1	0.965239	0.932773	0.911151	1.00813	1.01356	1.12304	2.05886	1.74005	1.75802	1	1.01099	1.00728	1.03329	1.16364	1.15034	1.06544	1.65059	1.61042	1.78338	1
C3orf58	0.518627	0.39538	0.54503	1.72274	1.76014	1.88113	1.74596	1.33278	1.63092	1	0.48026	0.427572	0.448278	2.00093	1.79238	2.36223	1.95508	2.4519	2.32746	1	0.716912	0.647608	0.847284	2.16407	2.23672	2.31998	1.53741	1.9307	1.50069	1
C4orf3	0.184009	0.224226	0.223366	2.17882	1.79731	2.84529	0.794743	0.996397	0.587128	1	0.277923	0.27659	0.335077	2.19729	1.90327	2.48058	0.83056	1.05889	0.550127	1	0.141438	0.154744	0.165098	2.45659	2.80863	2.63473	0.810755	0.863022	0.447066	1
C5	0.957333	0.885976	0.891499	1.2324	1.28831	1.23194	4.13553	2.08079	2.68511	1	1.15616	1.31694	0.992824	1.16301	1.25578	1.10929	2.39581	1.94615	2.4304	1	1.36466	1.01327	0.904882	1.27198	0.882227	1.18202	2.4119	2.35861	2.9697	1
C5orf22	1.70748	1.71216	1.89346	0.93553	0.877863	0.961069	0.692016	0.804879	0.664891	1	1.83145	1.70849	2.17791	0.861354	0.827561	0.870694	0.482542	0.552133	0.655393	1	1.68223	1.51243	1.76986	0.926187	0.934806	0.862115	1.11902	0.968392	1.14045	1
C5orf24	0.505092	0.416881	0.485559	0.721097	0.882789	0.923641	3.76756	4.09093	4.59395	1	0.834259	0.757232	0.832312	0.513771	0.689927	0.502232	4.1866	2.88673	3.26334	1	0.432268	0.412862	0.442009	0.456829	0.47888	0.636386	5.30851	4.46949	5.74796	1
C5orf51	1.66091	1.64467	1.63455	0.501294	0.490605	0.401168	0.592821	0.589944	0.666863	1	1.91784	2.00294	1.91132	0.595226	0.60736	0.481629	0.425694	0.438983	0.44493	1	1.73443	1.86834	1.82895	0.44867	0.377103	0.285779	0.309332	0.243254	0.255112	1
C6orf106	1.5002	1.29243	1.41895	1.00949	0.849138	1.04192	0.665722	0.982312	1.09308	1	1.60738	1.49467	1.57969	0.953484	0.90422	0.795217	0.541	0.581758	0.639702	1	1.40351	1.42575	1.40496	0.890032	0.75733	0.772795	0.668246	0.613235	0.595245	1
C6orf203	0.531297	0.514748	0.509089	1.90577	1.89526	1.87965	1.41983	1.18635	1.11829	1	0.27267	0.2697	0.280667	2.23667	2.25762	2.40655	0.666411	0.882698	0.404976	1	0.44765	0.458704	0.443366	1.65854	1.71784	1.94521	1.11695	1.01568	0.854821	1
C6orf47	0.36226	0.318276	0.393517	1.86367	1.76288	2.51387	0.804779	0.828781	0.5337	1	0.272736	0.121506	0.294198	2.50906	2.34189	2.91447	0.649152	0.910585	0.448056	1	0.281178	0.282029	0.239633	1.84316	1.81116	2.07919	1.09661	1.11379	1.58387	1
C6orf89	0.448822	0.486077	0.505848	1.42231	1.56318	1.64947	1.03461	0.85713	0.759185	1	0.709874	0.751042	0.62413	2.26866	1.72013	2.22214	0.944213	1.15638	1.55877	1	0.746403	0.816661	0.777072	1.65482	1.79674	1.85966	1.2464	1.263	1.20625	1
C7	1.08873	1.07946	0.910083	1.26676	1.02468	1.07213	2.45518	1.11632	1.12847	1	1.21961	1.2763	1.27667	1.13306	1.13679	1.02264	2.2084	1.78649	2.55734	1	1.17791	0.983583	1.03383	1.52789	0.649119	1.48535	1.99749	3.01186	2.43366	1
C7orf25	1.31303	1.31747	1.08723	0.640358	0.708094	0.640149	1.24628	1.04122	1.28121	1	1.29739	1.32381	1.30871	0.882014	0.841196	0.842596	1.17929	1.29263	1.02803	1	1.36301	1.50485	1.38744	0.804495	1.15397	0.969371	1.33716	1.20723	1.54384	1
C7orf43	1.18234	1.24033	1.16637	0.97956	0.927115	0.985344	0.872568	0.886906	0.95334	1	1.29978	1.3606	1.61623	1.30398	1.47944	1.32762	0.999015	0.717398	1.35233	1	1.1094	1.18864	1.23323	1.05167	1.07471	1.07261	0.845445	0.907588	0.711611	1
C7orf50	0.557127	0.567315	0.512213	1.21297	1.30904	1.40518	1.63351	1.95464	2.37722	1	0.741372	0.644576	0.644337	1.12056	1.13065	1.25178	2.21228	2.13351	1.91636	1	0.650821	0.685234	0.620492	1.01296	1.16935	1.22403	2.23618	1.91327	2.28725	1
C7orf55	0.416226	0.382383	0.44988	1.89107	2.23788	1.93154	1.39051	1.30937	0.883579	1	0.586298	0.537688	0.530424	1.94968	1.81655	2.07952	0.983661	1.00607	0.921202	1	0.469811	0.445919	0.430928	2.23418	2.55069	2.70345	0.867459	1.0668	0.995741	1
C8A	1.32571	1.50797	1.01007	0.982379	0.966932	1.06408	2.83537	1.28649	2.25014	1	1.1382	1.44905	1.264	1.00868	0.942061	0.958004	1.90149	2.08464	3.08395	1	0.654926	1.07153	0.770433	1.50651	0.790303	1.39587	1.9391	1.86011	1.87932	1
C8B	0.667785	0.745033	0.716767	1.357	1.26187	1.28963	3.49964	2.18799	3.04818	1	1.04321	1.34645	0.918798	1.03608	0.978412	0.989078	2.27402	1.88637	2.76876	1	1.13862	1.06475	0.948403	1.47228	0.759004	1.24502	1.8095	2.88207	2.63253	1
C8G	0.755807	0.816585	0.713827	1.33043	1.06278	1.1285	2.98164	1.22327	1.4508	1	0.917129	1.15684	0.980407	0.888386	1.01475	1.05132	1.73362	1.56745	1.61211	1	1.08491	1.05859	0.988903	1.1773	0.766187	1.03666	1.25895	2.10179	1.7358	1
C8orf33	1.11501	1.17862	1.19115	0.846883	0.811163	0.845281	0.984737	1.24132	1.36507	1	1.15788	1.1276	1.18839	0.871138	0.809877	0.720182	1.34021	1.2431	1.18716	1	1.00477	1.07141	1.13929	0.830087	0.672964	0.639532	1.17712	0.977822	1.03286	1
C8orf59	0.766229	0.749346	0.820833	0.843326	0.793614	0.848108	1.71963	1.29802	1.86689	1	0.882335	0.943862	0.857028	1.08153	0.974512	1.15256	2.15703	1.9972	2.09274	1	0.938871	1.00081	0.981571	1.25944	0.946014	1.15578	2.09019	1.71258	1.98493	1
C8orf82	0.252292	0.203751	0.216953	2.34227	2.10575	2.40329	0.891509	1.13511	0.716625	1	0.231584	0.264099	0.235678	1.82515	1.59188	1.9409	0.543321	0.710572	0.665563	1	0.289445	0.240587	0.253556	2.73914	2.30318	2.93856	0.903688	1.24885	0.479249	1
C9	0.82484	0.869119	0.769196	1.24287	1.13762	0.960191	4.22017	2.56008	3.23778	1	0.977454	1.17114	0.927896	1.17759	1.23946	0.866111	2.10817	2.1216	4.29218	1	0.9011	1.01067	1.02045	1.49815	1.09427	1.1535	2.41082	2.68958	2.56988	1
C9orf114	0.676162	0.723507	0.680474	0.650719	0.641036	0.683407	2.00103	3.22777	4.23928	1	0.403213	0.325564	0.36008	0.601488	0.673575	0.628227	4.07022	3.18186	3.18517	1	0.334398	0.296138	0.329603	0.789188	0.794886	0.867828	3.38707	2.77854	4.45183	1
C9orf142	1.55807	1.62065	1.47355	0.80282	0.808348	0.759961	0.50582	0.71809	0.695262	1	1.72348	1.65723	1.64602	0.867668	0.959883	0.84119	0.663589	0.728333	0.586583	1	1.55031	1.61196	1.57365	0.825956	0.797265	0.778601	0.735911	0.765344	0.877195	1
C9orf64	1.51164	1.579	1.53166	0.501323	0.51913	0.425478	0.421416	0.406588	0.341247	1	1.76124	1.70306	1.74426	0.540327	0.665815	0.465033	0.654494	0.527857	0.703951	1	1.75471	1.59174	1.61209	0.64547	0.675674	0.544098	0.566227	0.555664	0.592759	1
C9orf78	1.13882	1.12614	1.10865	0.99645	0.980495	1.02389	0.807921	0.859849	0.9932	1	1.15993	1.10539	1.18748	1.08319	1.11871	1.12998	1.02387	0.918628	0.791295	1	1.1655	1.16081	1.15757	1.10689	1.08265	1.1501	1.04408	0.968461	0.906718	1
CA2	1.15935	1.19596	1.07844	0.60398	0.557	0.510298	0.557104	0.706106	0.886167	1	2.35259	2.41945	2.23659	0.858768	0.784296	0.444878	1.04114	0.870023	12.5037	1	1.3241	0.986797	1.23908	0.954881	0.848251	1.13574	1.51424	2.25844	2.19112	1
CA5B	0.400574	0.421557	0.428407	2.40586	2.52811	2.45385	1.21741	1.3289	0.825295	1	0.303727	0.383683	0.36109	1.96187	1.87649	2.28825	0.698354	0.829953	0.780186	1	0.430797	0.431871	0.454434	1.75286	1.79489	1.98875	0.845294	0.905772	0.551893	1
CAAP1	0.298983	0.328966	0.329143	0.908569	0.9944	1.00018	2.63049	3.14605	4.13626	1	0.353436	0.399983	0.416721	1.01445	0.984761	1.12623	3.7412	3.32747	2.96769	1	0.399564	0.435035	0.448158	1.21443	1.30094	1.27882	3.54031	2.62819	2.94249	1
CAB39	1.85171	1.87221	1.76946	0.821251	0.774883	0.622842	0.695174	0.711119	0.726759	1	1.54581	1.62528	1.56859	0.738789	0.717465	0.615832	0.629412	0.644726	0.850408	1	1.65268	1.60368	1.67369	0.6849	0.620121	0.581033	0.670378	0.685094	0.683614	1
CAB39L	1.5905	1.54729	1.47711	0.718531	0.648638	0.564307	0.740683	0.767555	0.837218	1	1.69284	1.68632	1.80233	0.650162	0.767721	0.481029	0.649958	0.567302	1.04379	1	1.82655	1.68502	1.62835	0.608665	0.591241	0.576714	0.461449	0.501973	0.566479	1
CABIN1	0.790083	0.794952	0.819122	0.965958	0.918198	0.901151	1.79418	1.47694	1.86764	1	0.705068	0.658007	0.782246	0.999484	1.1306	1.1431	2.54904	2.32821	2.16727	1	0.853262	0.741691	0.974906	1.16762	1.05961	1.03631	1.51684	1.79522	2.13599	1
CACNA2D2	0.455828	0.448409	0.451806	1.18665	1.38276	1.2922	0.956049	0.929517	0.991754	1	0.520834	0.453743	0.450895	2.51714	2.40944	2.63609	1.22867	1.23682	0.868702	1	0.490252	0.627339	0.595568	1.72748	2.06581	1.88193	1.62796	1.26075	1.25357	1
CACTIN	0.519273	0.588159	0.524237	1.10389	1.13254	1.16556	2.18353	1.74551	2.20981	1	0.547993	0.530364	0.542153	1.32987	1.27691	1.36087	2.66901	2.00902	1.86544	1	0.51222	0.536211	0.507714	1.26122	1.33249	1.20666	2.44152	2.01235	3.85684	1
CACUL1	1.01312	0.955642	0.90898	1.10908	1.10733	1.18863	1.68749	1.97437	1.94782	1	1.13858	1.117	1.10055	1.06567	1.18571	1.05041	1.65198	1.66602	1.52533	1	1.23446	1.24613	1.35166	1.00213	1.00059	1.0248	1.15873	1.19991	1.23913	1
CACYBP	1.51155	1.61392	1.52039	0.900391	0.88755	0.811042	0.600778	0.653285	0.659577	1	1.65257	1.62251	1.53683	0.937336	0.980186	0.878497	0.638325	0.611696	0.640526	1	1.51907	1.50695	1.52495	0.82589	0.716781	0.752515	0.538733	0.535977	0.531711	1
CAD	1.70081	1.72682	1.71017	0.737249	0.734654	0.622655	0.683467	0.632896	0.706309	1	1.64429	1.60945	1.5428	0.629427	0.638337	0.492027	0.458917	0.508416	0.550441	1	1.61092	1.59937	1.56191	0.599379	0.632435	0.509352	0.730636	0.708396	0.837136	1
CALCOCO1	1.48909	1.35556	1.42112	0.73804	0.714624	0.793061	0.532228	0.588907	0.604168	1	1.3832	1.37822	1.29719	1.09008	1.06791	1.05206	0.589118	0.553344	0.60421	1	1.51021	1.65669	1.51829	0.922365	1.03538	0.952626	0.573659	0.614915	0.637819	1
CALCOCO2	0.963292	0.862923	0.976918	0.966357	1.03103	1.13569	0.827549	0.913438	0.908703	1	0.967089	0.823775	0.897357	1.07751	0.950212	1.09579	0.685784	0.855587	0.711309	1	1.21332	1.2921	1.30007	1.03172	1.10959	1.16595	1.01398	0.939159	0.913064	1
CALML3	1.14961	0.993237	0.955204	0.903257	0.956509	0.951679	0.774357	0.97904	1.3993	1	1.49008	1.63232	0.861232	1.08941	0.987993	0.918946	1.28818	0.994582	2.02275	1	0.962782	1.15143	0.995342	1.18224	1.06038	1.27814	1.20834	0.836817	1.22789	1
CALR	0.415746	0.393335	0.388546	2.04105	2.08657	2.09413	0.915994	0.845941	0.570878	1	0.386981	0.382985	0.382205	2.31862	2.17058	2.55172	0.55958	0.781608	0.371979	1	0.325983	0.326052	0.339752	2.25155	2.28043	2.67915	0.85863	0.99635	0.564308	1
CALU	0.469886	0.48971	0.432122	1.67357	1.56982	1.82796	0.788253	0.804193	0.496206	1	0.527915	0.544205	0.561301	1.87558	1.67784	1.97123	0.818322	0.915885	1.30171	1	0.560957	0.571873	0.569774	2.09632	2.13382	2.33476	0.854087	1.04444	0.704841	1
CAMK1	1.29785	1.23608	1.33582	0.974489	0.997138	0.975461	1.13626	1.10885	1.04891	1	1.14168	1.15355	1.21013	1.14987	1.17618	1.25902	0.991313	1.09886	1.35638	1	1.10419	1.05998	0.98789	0.983249	0.963778	0.864009	1.8552	1.66515	2.82776	1
CAMK1D	1.37235	1.21756	0.956078	0.642993	0.546091	0.520871	0.57751	0.448083	0.595045	1	1.42998	1.43012	1.49937	0.698952	0.757019	0.646881	1.31796	0.905729	1.74749	1	1.42869	1.78449	1.21026	0.575187	0.52915	0.512483	0.743165	0.683406	0.696731	1
CAMK2D	1.68995	1.74289	1.62512	0.911354	0.962482	0.85164	0.521985	0.558425	0.481676	1	1.37832	1.40311	1.35192	0.825238	0.79995	0.715493	0.420416	0.589023	0.52787	1	1.37386	1.48117	1.45585	0.807262	0.79534	0.63963	0.524142	0.606582	0.614378	1
CAMK2G	1.78905	1.8035	1.67258	0.94421	0.904576	0.830789	0.564532	0.629616	0.436405	1	1.65739	1.57433	1.46171	0.834398	0.789549	0.68927	0.345275	0.470587	0.340351	1	1.42555	1.36694	1.4453	0.814639	0.791386	0.682146	0.497714	0.754993	0.721695	1
CAMK4	1.5164	1.51247	1.49755	0.747421	0.709981	0.639092	0.684027	0.716809	0.77357	1	1.32843	1.32368	1.30954	0.564328	0.562941	0.446501	0.466922	0.471779	0.468826	1	1.6113	1.6239	1.66138	0.669011	0.67183	0.603428	0.794714	0.965163	0.871523	1
CAMLG	0.373569	0.366477	0.383165	2.33215	2.10672	2.52619	1.16855	1.21717	0.893536	1	0.525144	0.579704	0.412841	1.73036	1.64371	1.91403	1.14295	0.998219	0.716777	1	0.448845	0.497875	0.436379	1.68723	1.89457	2.22342	1.6344	1.46145	1.65166	1
CAMSAP1	1.0907	1.06762	1.12564	1.01114	1.00881	1.00917	0.949935	1.0925	1.13675	1	1.05422	1.23394	1.21326	1.06199	0.970164	1.10351	1.02309	1.09068	1.21726	1	1.11846	1.12829	1.11588	0.999088	1.06986	1.0139	0.907185	0.896411	0.822619	1
CAMSAP2	1.11777	1.10997	1.1371	0.835026	0.797222	0.849495	1.00425	1.00401	1.1795	1	1.22261	1.14515	1.1321	0.707197	0.714478	0.557091	0.624019	0.729875	0.935911	1	1.13406	1.18666	1.13373	0.702802	0.788805	0.829251	0.59732	0.71498	0.489177	1
CAND1	1.56686	1.59332	1.58848	0.794175	0.779486	0.7481	0.604388	0.5646	0.531733	1	1.65396	1.62607	1.60815	0.787083	0.832409	0.732987	0.506908	0.521489	0.546137	1	1.49472	1.54425	1.52835	0.814182	0.794828	0.728446	0.559661	0.581711	0.579703	1
CAND2	1.4068	1.385	1.28678	0.545317	0.55057	0.469305	0.59898	0.488248	0.643721	1	0.95633	0.884947	0.920284	0.447552	0.503271	0.437545	1.09662	0.947888	0.844541	1	1.12627	1.43833	1.17114	0.53283	0.50275	0.382161	1.3095	1.58014	1.38316	1
CANT1	0.18841	0.243573	0.221611	1.7796	1.66319	2.02396	0.475693	0.756482	0.7017	1	0.414422	0.41164	0.412228	2.25221	1.89917	2.32363	0.808647	0.920054	2.73007	1	0.475144	0.447146	0.438417	2.35849	2.2317	2.61311	0.901879	1.08643	0.439812	1
CANX	0.245352	0.24772	0.280778	2.50302	2.33523	2.47484	1.09838	1.06387	0.68381	1	0.266869	0.273816	0.289385	2.47741	2.26851	2.64764	0.778981	0.983422	0.636096	1	0.281199	0.272837	0.276807	2.16208	2.11303	2.36908	0.881105	0.966379	0.617892	1
CAP1	1.73267	1.72265	1.76432	0.586527	0.576975	0.465739	0.575611	0.566173	0.639847	1	1.78669	1.76978	1.76485	0.552668	0.586148	0.414205	0.52312	0.46003	0.544596	1	1.81484	1.88133	1.86987	0.566618	0.479234	0.382154	0.43204	0.436831	0.494151	1
CAPG	2.02312	2.0556	2.19769	0.818469	0.826576	0.693924	0.765666	0.800618	0.988408	1	1.28611	1.27962	1.26079	0.51864	0.590851	0.450569	0.469672	0.464302	0.531004	1	1.68978	1.76603	1.7083	0.635327	0.575377	0.532428	0.689976	0.699416	0.823566	1
CAPN1	1.60368	1.59086	1.60985	0.782744	0.744936	0.672313	0.59112	0.564137	0.610595	1	1.68822	1.8133	1.74773	0.7735	0.741885	0.637132	0.549871	0.571104	0.65725	1	1.62752	1.61918	1.70406	0.678219	0.685975	0.5819	0.599309	0.614885	0.662552	1
CAPN15	1.05755	0.915289	0.972381	0.84219	0.812883	0.853202	0.844796	0.951597	1.03613	1	1.40065	1.25938	1.4164	1.03562	0.976941	1.11752	0.664322	0.724448	0.651995	1	1.65434	1.82232	1.55744	1.68729	1.55095	1.82564	0.658534	1.28817	0.468159	1
CAPN2	1.66069	1.65184	1.71229	0.80091	0.75598	0.691799	0.524024	0.510824	0.47708	1	1.82299	1.88616	1.85838	0.819113	0.764584	0.630587	0.505907	0.510503	0.560411	1	1.62419	1.58366	1.61016	0.716303	0.680338	0.595341	0.56567	0.625518	0.650759	1
CAPN5	0.584269	0.522644	0.597756	1.87454	1.60557	2.05644	0.788911	1.07694	0.70382	1	0.29535	0.306075	0.344211	2.18123	1.92688	2.40525	0.756487	0.831241	1.45674	1	0.351564	0.372112	0.393621	2.10549	2.31383	2.64669	0.911418	0.995121	0.413287	1
CAPN7	1.6557	1.71095	1.67379	0.613699	0.594278	0.580938	0.514523	0.476462	0.462998	1	1.7326	1.72397	1.72277	0.679564	0.69946	0.500238	0.467667	0.496417	0.422178	1	1.64214	1.72523	1.66045	0.680607	0.678798	0.643517	0.529462	0.56943	0.639786	1
CAPNS1	1.37209	1.33837	1.41757	0.850761	0.830012	0.793732	0.737794	0.656239	0.694652	1	1.80025	1.82051	1.83551	0.880608	0.82557	0.651941	0.586432	0.511005	0.41439	1	1.5936	1.71753	1.66029	0.809084	0.786927	0.689926	0.547541	0.553049	0.484678	1
CAPRIN1	1.02316	0.906927	0.905831	0.983828	1.01778	1.25259	0.968479	1.26815	1.40458	1	1.00639	0.919897	0.916381	1.14264	1.29253	1.48741	1.89414	1.77717	1.4622	1	0.998787	1.08706	1.05578	1.0663	1.05142	1.14799	1.24722	1.02702	1.08748	1
CAPZA1	1.54848	1.5743	1.55659	0.776668	0.792863	0.701521	0.691211	0.654123	0.663497	1	1.52556	1.5328	1.54928	0.787456	0.777858	0.653618	1.03451	0.818777	0.862879	1	1.5162	1.4496	1.53741	0.756769	0.728605	0.642841	0.77519	0.806994	0.930644	1
CAPZA2	1.35829	1.43923	1.4102	0.832892	0.836789	0.77383	0.816821	0.826719	0.847881	1	1.5717	1.54914	1.5375	0.65161	0.654893	0.55458	0.824437	0.674346	0.641361	1	1.53096	1.57466	1.55837	0.811214	0.810804	0.65343	0.789623	0.821206	0.873376	1
CAPZB	1.37909	1.38783	1.38516	0.789243	0.797416	0.70366	0.812957	0.858246	0.924827	1	1.58514	1.53791	1.56063	0.842329	0.866767	0.742544	1.02624	0.866523	0.822533	1	1.51674	1.48549	1.4809	0.819469	0.796569	0.738834	0.796493	0.836869	0.941548	1
CARD11	1.50269	1.49751	1.53321	0.72356	0.756879	0.651518	0.609131	0.57891	0.618142	1	1.72912	1.76017	1.7661	0.76893	0.820821	0.681754	0.49034	0.570565	0.493418	1	1.51974	1.53341	1.4909	0.658754	0.691679	0.59256	0.537697	0.534345	0.564692	1
CARD16	1.54029	1.64689	1.5536	0.459791	0.470117	0.368577	0.368419	0.736383	0.592588	1	2.04057	2.10418	2.23946	0.504766	0.559505	0.41996	0.446846	0.439336	0.372667	1	1.49288	1.56797	1.3886	0.570523	0.470383	0.377729	0.42378	0.452903	0.428379	1
CARD17	1.24176	1.26848	1.25315	1.09352	1.08126	1.0442	1.15356	0.995061	1.0124	1	1.76375	1.63707	1.72803	0.830988	0.789478	0.805009	0.768134	0.722863	0.671055	1	1.54531	1.26921	1.45406	0.395335	0.415569	0.333417	2.15317	1.17523	2.9895	1
CARD19	0.580393	0.638808	0.652028	1.68222	1.76475	1.95845	1.14972	1.16475	0.968322	1	0.584208	0.597076	0.65822	1.83503	1.48353	1.83918	1.10894	1.05524	0.888311	1	0.76692	0.716989	0.76569	2.07409	1.7852	1.98065	1.18762	1.41566	1.4109	1
CARD8	1.50157	1.46848	1.41204	0.737341	0.730968	0.678073	0.912512	0.718223	0.742709	1	1.71156	1.75384	1.93219	0.664751	0.710803	0.539466	0.635484	0.660504	0.69451	1	1.73546	1.68985	1.69585	0.630012	0.585293	0.489174	0.354271	0.375632	0.393839	1
CARHSP1	1.31392	1.39142	1.43674	0.695023	0.59182	0.577269	1.08124	1.14946	1.25611	1	1.48665	1.56102	1.51099	0.671521	0.67628	0.652777	1.05237	1.02496	1.06866	1	1.62546	2.10815	1.75316	0.875022	0.810009	0.810918	0.951073	0.847878	0.673519	1
CARM1	1.4284	1.54178	1.45516	0.943721	0.919044	0.869756	0.539102	0.596229	0.652916	1	1.26519	1.2579	1.1765	0.806327	0.859695	0.795786	0.482184	0.551508	0.470695	1	1.66293	1.81493	1.79424	0.920563	0.825786	0.815367	0.726353	0.680633	0.652255	1
CARMIL2	1.25172	1.13915	1.13598	0.96	1.15559	1.24929	0.878487	0.901351	1.07879	1	1.22711	1.17664	1.19636	1.00019	1.10798	1.17681	0.894357	0.902004	0.844244	1	1.14591	1.06644	1.06033	0.91258	1.14016	1.05157	0.954813	0.994555	1.10837	1
CARNMT1	1.02406	1.02333	0.962717	0.89147	1.02028	1.03351	1.10272	1.07306	1.06219	1	1.33638	1.09625	1.29785	1.14081	1.6395	1.20744	2.06694	1.62675	1.44609	1	1.04723	1.13271	1.09499	1.01857	1.24385	1.12219	1.19175	0.992809	1.62893	1
CARS	1.68312	1.75244	1.72076	0.741123	0.718356	0.603015	0.443895	0.468563	0.50229	1	1.68418	1.70446	1.61217	0.621482	0.632874	0.499845	0.362997	0.424382	0.481647	1	1.68975	1.73691	1.76098	0.657858	0.588812	0.522807	0.562212	0.542158	0.536937	1
CARS2	0.408433	0.476771	0.46005	2.09849	2.00462	2.11778	1.12063	1.1382	0.787043	1	0.442522	0.442799	0.461657	2.09376	1.93462	2.19772	0.69564	0.894303	0.67938	1	0.374775	0.435989	0.398664	1.63734	1.56725	1.85557	1.16897	1.09446	0.816841	1
CASC3	0.958526	0.945037	0.893707	1.2168	1.29134	1.5375	0.908438	1.08117	0.944777	1	0.834901	0.763869	0.796383	1.27113	1.33205	1.52787	1.33198	1.42061	1.17929	1	0.8669	1.03794	0.940912	1.38147	1.28371	1.53249	0.955487	0.898094	0.657847	1
CASC4	0.278176	0.330837	0.258064	2.07537	1.952	2.10445	1.05426	1.02415	0.872146	1	0.334491	0.324032	0.38911	2.22002	2.18531	2.48784	0.638034	0.907205	0.621282	1	0.265126	0.318012	0.345412	2.08261	2.17343	2.47356	0.813368	0.916973	0.554168	1
CASD1	0.592562	0.654035	0.592292	1.20069	1.1533	1.14558	0.904716	1.37149	1.22443	1	0.566892	0.527757	0.519507	1.99658	1.56017	1.87073	1.52098	1.24092	8.35135	1	0.72003	0.743559	0.529038	1.78038	1.75474	1.90307	1.19703	1.48899	1.34279	1
CASK	1.15648	1.23315	1.16663	1.32162	1.28666	1.35187	0.890848	0.765838	0.688384	1	1.23375	1.23164	1.28834	1.04603	1.09492	1.09542	0.896741	0.750542	1.22451	1	1.03026	0.981086	1.04745	1.09598	1.11948	1.10179	0.872832	0.724373	1.01567	1
CASP1	1.52985	1.61775	1.52005	0.675149	0.69739	0.619225	0.739531	0.660227	0.888552	1	1.91948	1.9175	1.97655	0.752979	0.672082	0.525825	0.606611	0.571241	0.553245	1	1.77127	1.70711	1.62375	0.600769	0.619385	0.469557	0.738472	0.630811	0.658859	1
CASP10	2.06951	2.06534	1.93625	0.509201	0.509051	0.383656	0.335319	0.336513	0.393814	1	1.96929	2.04222	1.79318	0.623014	0.693042	0.47157	0.299206	0.490219	0.316845	1	1.67451	1.85344	1.76984	0.461467	0.390085	0.295125	0.275957	0.348666	0.327968	1
CASP14	1.09302	0.714868	0.698157	2.3336	0.987828	1.46334	2.59584	1.87484	2.13341	1	0.654247	0.719532	0.824263	0.957891	0.957362	0.951524	1.86324	2.10707	8.56497	1	0.637171	0.512621	0.450534	0.744953	0.528961	0.915273	1.3738	3.15952	4.1624	1
CASP2	1.36201	1.21677	1.35143	0.542092	0.546179	0.525958	0.424347	0.438581	0.439763	1	1.39664	1.39863	1.66828	0.6247	0.623392	0.539212	0.434942	0.456156	0.353388	1	1.60216	1.74951	1.68358	0.820826	0.788625	0.611534	0.45803	0.504601	0.475656	1
CASP3	1.42014	1.48467	1.3885	0.620017	0.637717	0.525552	0.443323	0.421069	0.359079	1	1.60976	1.62058	1.57414	1.03738	1.12388	1.27923	0.640715	0.667779	0.614035	1	1.29858	1.35992	1.05514	1.02268	1.06809	1.0562	0.612124	0.683069	0.662958	1
CASP4	1.20438	1.23623	1.2024	1.23425	1.15836	1.16687	0.763153	0.802985	0.839908	1	1.31445	1.45026	1.28832	1.21876	1.11189	1.16908	0.762968	0.824799	0.900056	1	1.1475	1.14242	1.15823	1.15698	1.19421	1.26672	0.635872	0.708793	0.538692	1
CASP6	1.81674	1.84112	1.92578	0.758982	0.798657	0.656895	0.574824	0.54931	0.553978	1	1.65459	1.66579	1.71478	0.659672	0.722899	0.457826	0.464282	0.474497	0.540588	1	1.85496	1.70357	1.74025	0.587263	0.479724	0.402364	0.521464	0.456289	0.55112	1
CASP7	1.73998	1.78045	1.92948	0.751124	0.724706	0.63046	0.575453	0.578442	0.580754	1	1.41295	1.46324	1.51665	0.707626	0.684885	0.640408	0.789914	0.721122	0.784813	1	1.7771	1.69833	1.65247	0.804831	0.661284	0.606705	0.580434	0.579199	0.633871	1
CASP8	1.5944	1.5628	1.61014	0.603806	0.562337	0.479044	0.305993	0.434576	0.445797	1	1.72207	1.89678	1.7952	0.766526	0.787705	0.710423	0.382132	0.501944	0.35698	1	1.8798	1.90881	1.76192	0.789938	0.747907	0.631391	0.430514	0.582706	0.352892	1
CASS4	1.93894	1.83591	1.78602	0.991837	0.959569	1.14979	0.615707	0.965875	0.662039	1	1.41064	1.4192	1.58435	1.17595	1.04442	1.07477	0.715003	0.783665	0.687901	1	1.24527	1.464	1.36074	0.930252	0.589117	0.750247	0.800087	0.937486	0.825804	1
CAST	1.56432	1.63818	1.55919	0.833588	0.817115	0.707777	0.559422	0.560897	0.574279	1	1.82997	1.89061	1.80999	0.864028	0.949592	0.745068	0.607778	0.55515	0.862647	1	1.46969	1.53775	1.46639	0.741245	0.682614	0.667212	0.422099	0.446951	0.424698	1
CAT	1.28902	1.32995	1.30705	1.481	1.42977	1.29294	0.827868	0.705994	0.70376	1	1.01827	1.05347	1.03171	1.17204	1.14539	1.19796	0.563246	0.581069	0.512919	1	1.24016	1.1828	1.18238	1.11614	1.0197	1.12183	0.604377	0.65691	0.625653	1
CBFA2T2	0.483958	0.434575	0.445785	1.09639	1.20621	1.39007	1.70418	2.06067	2.64623	1	0.821156	0.950122	0.887434	1.33109	1.26287	1.28629	1.38111	1.2182	1.64958	1	1.21288	1.19077	1.04793	0.967748	1.03545	1.068	1.12856	1.45064	1.53699	1
CBFB	1.03686	1.01446	1.00237	0.692759	0.713673	0.6989	1.32785	2.10574	2.70559	1	0.994993	1.0154	1.07734	0.745278	0.897842	0.785135	2.824	2.38049	2.14826	1	1.04489	1.0983	1.05375	0.78245	0.787941	0.746094	1.84806	1.78746	1.90956	1
CBL	1.48132	1.60406	1.58512	0.796355	0.805178	0.802193	0.439248	0.543579	0.487266	1	1.47913	1.501	1.58038	0.892172	0.907018	0.782622	0.456953	0.518621	0.566537	1	1.39521	1.45197	1.51904	0.717886	0.802737	0.652239	0.38842	0.540096	0.36657	1
CBLB	1.1874	1.19752	1.06383	0.902445	0.927166	0.986993	0.4823	0.61265	0.505777	1	1.43052	1.57077	1.53956	1.11832	1.10257	1.1212	0.619176	0.702485	0.574615	1	1.34851	1.22275	1.28183	0.914122	1.23228	0.975131	0.61791	0.714098	0.619837	1
CBLL1	0.517062	0.527975	0.550686	0.856476	0.909747	1.12113	1.73384	2.5254	3.10659	1	0.390065	0.35448	0.360224	1.06133	1.05182	1.26429	3.65776	3.30294	2.7574	1	0.48302	0.577831	0.340246	0.864959	1.09128	0.992843	2.75757	2.08685	2.89762	1
CBR1	1.88307	2.02924	1.87635	0.699336	0.705936	0.517527	0.689585	0.517119	0.528644	1	1.76939	1.7858	1.78699	0.567061	0.583793	0.482276	0.307324	0.391042	0.381189	1	1.67278	1.82937	1.84611	0.55242	0.491363	0.394542	0.387168	0.393868	0.343336	1
CBR3	1.62576	1.81511	1.73584	0.782715	0.737821	0.624198	0.388148	0.417466	0.365017	1	1.20294	1.20459	1.22998	0.545422	0.550173	0.511355	0.271628	0.369541	0.339655	1	2.12558	2.17022	2.17488	0.797097	0.684456	0.613535	0.522069	0.4703	0.524415	1
CBR4	0.496302	0.495497	0.588905	2.1246	2.15699	2.01999	0.920507	0.838744	0.533928	1	0.566022	0.497948	0.444101	1.92941	1.70736	2.1481	0.562405	0.81628	0.602254	1	0.420743	0.464895	0.450044	2.36516	2.31567	2.60226	0.91174	0.986371	0.611735	1
CBX1	0.457374	0.402782	0.433943	1.60114	1.69191	1.55082	1.66761	2.09274	2.21061	1	0.436376	0.414212	0.437778	1.45095	1.47573	1.6491	2.07073	1.98693	1.66501	1	0.574324	0.576581	0.58527	1.43415	1.39577	1.57401	2.11749	1.8255	1.92841	1
CBX3	0.575582	0.556547	0.588889	1.3738	1.50411	1.41285	1.45611	1.62264	1.71926	1	0.620263	0.576854	0.629903	1.57819	1.6888	1.79485	1.75087	1.72301	1.38919	1	0.594088	0.633932	0.679806	1.44636	1.40294	1.5409	1.60226	1.35669	1.37157	1
CBX4	0.330939	0.328437	0.318049	0.663641	0.715126	0.802833	2.17964	2.97496	3.58378	1	0.301416	0.259942	0.273886	0.64957	0.76244	0.833011	4.12391	3.71019	3.67615	1	0.301582	0.273218	0.232988	0.871868	1.06829	1.12872	5.06325	3.89805	5.02757	1
CBX5	0.344631	0.334848	0.353864	0.869014	0.957711	0.937813	2.62206	3.42801	3.8398	1	0.340577	0.320848	0.339882	0.854097	0.881767	0.978618	3.58162	2.92097	2.92373	1	0.460089	0.5118	0.505281	1.05008	0.970375	1.0813	3.61575	2.96275	3.79918	1
CBX6	0.446452	0.476581	0.523184	1.63591	1.47619	1.7604	1.62793	1.76789	2.30712	1	0.391926	0.311997	0.377581	0.891338	0.840648	1.14326	3.94123	3.79471	3.75455	1	0.644525	0.598098	0.671561	1.38567	1.50667	1.36427	4.4375	3.22081	5.14725	1
CBX7	0.24153	0.257708	0.244654	0.495493	0.518158	0.556125	3.75293	4.46869	6.00874	1	0.27392	0.252044	0.248936	0.774798	0.743321	0.845627	4.69908	4.20621	3.75079	1	0.384437	0.440003	0.415967	1.10081	0.773215	0.860125	4.62651	4.13611	5.45393	1
CBX8	0.128572	0.160139	0.169967	0.513075	0.613434	0.598602	2.79229	3.52867	4.20968	1	0.128571	0.114423	0.102809	0.141501	0.176781	0.163945	6.45921	5.31447	4.63549	1	0.152647	0.217492	0.184167	0.503053	0.617478	0.658542	7.7347	5.78581	7.59988	1
CC2D1A	1.20562	1.06496	1.11303	0.994161	0.907768	1.10088	0.841521	0.960967	1.13967	1	1.27346	1.27973	1.29211	1.32264	1.14386	1.26201	0.89328	0.95735	0.987423	1	1.26303	1.2006	1.30131	1.10223	1.3653	1.07142	0.747901	0.652189	0.513701	1
CC2D1B	1.18896	1.24568	1.14143	1.02128	1.00482	1.11688	0.704861	0.702193	0.8545	1	1.27169	1.32577	1.28352	1.11012	1.03042	1.10801	0.60271	0.730814	0.651038	1	1.24367	1.23582	1.30768	1.12819	1.21696	1.06413	0.66685	0.733001	0.697979	1
CCAR1	0.322941	0.291519	0.325894	0.926807	1.01596	1.22994	2.95876	3.33669	3.77618	1	0.290127	0.275805	0.2814	0.920331	0.929917	1.10854	4.16936	3.8911	3.67	1	0.361102	0.369244	0.339374	1.0184	1.24403	1.17725	3.55977	2.82212	4.30175	1
CCAR2	0.702786	0.694996	0.694702	1.39084	1.41211	1.57509	1.6408	1.47875	1.67883	1	0.636332	0.597325	0.646945	1.42465	1.33751	1.46938	1.82815	1.61308	1.44265	1	0.578202	0.601784	0.640824	1.6203	1.52766	1.56441	1.58454	1.47562	1.95198	1
CCDC109B	0.240045	0.223488	0.252154	1.92928	1.85627	2.19072	0.870758	1.06217	0.638795	1	0.321532	0.244422	0.322029	2.26064	2.17825	2.68739	0.775332	0.895098	0.711472	1	0.330934	0.251804	0.36744	2.10756	2.43567	2.423	0.996843	0.992283	0.652458	1
CCDC115	0.622223	0.716928	0.521445	1.54245	1.8229	1.88058	1.53334	1.1283	1.40513	1	0.812983	0.805129	0.607216	1.94518	1.96506	2.01993	1.00235	1.10938	1.28303	1	0.642356	0.577659	0.554886	2.05673	2.21558	2.62372	0.986223	0.836636	0.431783	1
CCDC117	0.756359	0.756842	0.764588	1.23463	1.15441	1.29901	0.903198	0.967512	0.881451	1	0.874999	0.664524	0.880227	1.36601	1.50766	1.38367	0.714175	0.758114	0.537281	1	0.799546	0.831995	0.841464	1.40121	1.26958	1.41618	1.07694	0.980558	1.21249	1
CCDC12	0.559192	0.603822	0.57399	1.2494	1.26097	1.26862	1.84345	2.24161	2.38491	1	0.606002	0.623735	0.615923	1.24844	1.17642	1.29977	2.58181	2.29905	1.94092	1	0.625198	0.732924	0.660961	1.16722	1.15641	1.17329	2.51739	1.78266	1.96624	1
CCDC124	1.06398	1.07842	1.1741	0.740499	0.766448	0.634142	1.77481	2.00183	2.90764	1	0.919779	1.07398	0.956062	0.797168	0.864627	0.783387	2.13793	2.05185	1.89777	1	1.05236	1.08488	0.983859	0.79539	0.774975	0.830717	1.46266	1.39304	1.32794	1
CCDC127	0.271502	0.274431	0.281708	1.79223	1.74698	2.0571	1.55893	1.54077	1.659	1	0.209478	0.199453	0.224569	2.00011	1.88604	2.39864	1.13563	1.2018	0.889703	1	0.25236	0.291326	0.248349	1.87628	2.0348	2.30651	1.39085	1.20826	1.26693	1
CCDC130	0.527597	0.49487	0.562616	1.05996	1.0536	1.04855	1.29935	1.58078	1.65112	1	0.544422	0.589998	0.624439	0.99505	0.998405	0.999438	2.69489	2.16226	2.34058	1	0.657405	0.791919	0.729036	1.32837	1.38791	1.25164	1.62042	1.74504	2.1247	1
CCDC134	0.380673	0.433391	0.3809	1.6656	1.72927	1.98907	0.84094	0.978396	0.695231	1	0.403244	0.370348	0.419183	1.79508	1.58945	1.97684	1.03376	1.01302	0.879477	1	0.303432	0.306473	0.306413	2.63495	2.79258	3.15253	1.10748	1.18706	0.555305	1
CCDC137	0.508274	0.408957	0.45454	1.22891	1.21825	1.15651	2.47011	2.5501	2.74518	1	0.448861	0.412504	0.494794	1.15564	1.21014	1.49216	2.71934	2.31407	1.74463	1	0.480331	0.527859	0.491619	1.23655	1.15817	1.35278	2.54848	2.0119	3.08075	1
CCDC167	0.313254	0.295915	0.276522	1.49955	1.48223	1.6563	0.8406	0.825134	0.58397	1	0.213953	0.208945	0.278199	2.80198	2.62416	3.28839	1.00098	1.17436	0.745405	1	0.320358	0.344591	0.327373	2.17904	2.11833	2.60629	1.10427	1.26158	0.900286	1
CCDC174	0.883249	0.826982	0.85894	1.25592	1.1868	1.23825	1.00344	1.12675	1.32744	1	0.750171	0.7125	0.746421	1.39948	1.34194	1.497	1.34267	1.32644	1.0827	1	0.65138	0.715804	0.799377	1.44786	1.61769	1.66018	1.30464	1.13669	0.815921	1
CCDC186	1.2012	1.20691	1.20289	0.928486	0.936799	1.03043	0.598262	0.689014	0.776726	1	1.37145	1.50122	1.2879	1.01859	1.04451	1.07765	0.626869	0.70256	1.13652	1	1.35174	1.40674	1.24023	1.0259	1.06026	1.10728	0.752196	0.764655	0.8311	1
CCDC22	1.57979	1.66657	1.59598	0.796893	0.796629	0.763297	0.541206	0.565144	0.591452	1	1.51196	1.57009	1.48314	0.798006	0.833201	0.741856	0.727986	0.718025	0.849705	1	1.47237	1.58775	1.57468	0.837178	0.748326	0.707715	0.569576	0.600845	0.645437	1
CCDC25	1.40847	1.41126	1.42155	0.755321	0.772328	0.667139	0.525807	0.55438	0.620221	1	1.29411	1.27591	1.23697	0.829678	0.809371	0.765416	0.865072	0.909021	0.779752	1	1.44692	1.44617	1.40857	0.783642	0.729372	0.714409	0.543762	0.580116	0.538044	1
CCDC28A	1.46147	1.40737	1.26855	0.85598	0.786106	0.825885	0.842542	1.26461	1.23874	1	1.03624	1.02993	0.967287	1.22307	0.99857	1.42274	1.60462	1.44002	1.33824	1	1.16245	1.25136	1.11125	1.04615	1.37693	1.22796	1.12499	0.845732	0.758436	1
CCDC43	1.54227	1.53636	1.5291	0.661192	0.660471	0.585823	0.413376	0.487596	0.446098	1	1.57484	1.64798	1.67595	0.72361	0.79803	0.570964	0.37115	0.42181	0.418301	1	1.59408	1.57763	1.54651	0.68735	0.64243	0.593669	0.399279	0.553977	0.629157	1
CCDC47	0.303869	0.331661	0.341006	2.02086	1.76751	1.96716	0.960326	1.1013	0.889788	1	0.303762	0.313425	0.312183	2.13667	2.01994	2.60325	0.776954	1.00144	0.67987	1	0.645453	0.534846	0.579179	1.66348	2.08222	2.11951	0.995168	1.10928	0.91759	1
CCDC51	0.457841	0.521378	0.459434	1.73713	1.67567	1.94706	0.831621	1.05054	0.839035	1	0.607472	0.485962	0.377143	1.62112	1.50902	1.6901	0.831995	1.04258	0.805661	1	0.381892	0.340095	0.382983	2.10017	1.78854	1.99069	0.879327	0.93917	0.754275	1
CCDC53	1.37328	1.30389	1.40113	0.809951	0.84757	0.88646	0.387847	0.457269	0.433268	1	1.64235	1.6748	1.67427	0.940794	0.902737	0.835779	0.433498	0.423561	0.455498	1	1.69158	1.49697	1.73786	0.70131	0.708202	0.636294	0.642418	0.718328	0.644441	1
CCDC58	0.469563	0.463864	0.466426	2.20297	2.30244	2.14393	0.885526	0.810799	0.488959	1	0.273335	0.288991	0.255362	2.50531	2.3109	2.87661	0.59362	0.785306	0.356971	1	0.195175	0.194594	0.234267	2.22326	2.19013	2.48735	0.7435	0.868896	0.418196	1
CCDC59	0.64348	0.57852	0.594538	1.03377	1.09524	1.08584	2.65898	2.18133	3.26692	1	0.579664	0.53843	0.549344	0.919299	0.959516	1.03564	3.81818	3.25706	2.7539	1	0.382548	0.483811	0.430297	1.06076	0.97814	1.09907	2.78106	2.18595	3.3269	1
CCDC6	1.49651	1.50342	1.53268	0.95142	0.960066	0.824334	0.74126	0.815602	0.846034	1	1.62773	1.43512	1.53677	0.935554	0.932269	0.815343	0.845712	0.923592	0.96423	1	1.26312	1.29966	1.33873	0.8513	0.811781	0.850395	0.606808	0.821275	0.567337	1
CCDC69	0.503185	0.500224	0.495579	1.69383	1.69675	1.94139	1.67753	1.53341	1.38621	1	0.776849	0.74254	0.721233	1.62202	1.50567	1.84335	1.16015	1.37315	1.51128	1	0.590144	0.645815	0.626819	1.40663	1.65866	1.55475	1.54232	1.26272	1.39554	1
CCDC82	0.64755	0.69506	0.758886	1.32539	1.40065	1.50778	1.19583	1.18869	1.10585	1	0.685997	0.63271	0.732296	1.09966	1.2568	1.21786	0.589013	0.768765	0.715367	1	0.958782	1.00687	1.02634	1.53282	1.50176	1.6575	0.977572	1.20357	0.818619	1
CCDC86	0.381125	0.382827	0.440649	0.638841	0.612746	0.611291	3.44668	4.09927	6.14577	1	0.409627	0.440537	0.468625	0.608902	0.617346	0.611131	4.78585	3.80346	4.15726	1	0.323163	0.349932	0.306358	0.522763	0.535251	0.467668	6.27714	5.20472	5.88706	1
CCDC88A	1.3177	1.45048	1.16547	1.19645	1.03545	1.13643	1.01505	0.820207	0.95496	1	1.18315	1.37954	1.03511	1.14092	1.25924	1.06945	1.72961	1.23824	1.34669	1	1.01974	1.14856	0.854006	0.741549	1.17851	1.01491	0.641197	0.558771	0.569458	1
CCDC88B	1.4282	1.43017	1.40237	0.870138	0.856124	0.870102	0.597208	0.664271	0.625109	1	1.57525	1.54366	1.56235	0.950018	0.948704	0.846903	0.68122	0.749742	0.660045	1	1.29623	1.33952	1.35475	0.807829	0.749449	0.773083	0.639661	0.705758	0.666943	1
CCDC88C	0.842131	0.843099	0.863775	1.16628	1.14348	1.2664	1.56565	1.5076	1.71174	1	0.98717	0.975373	0.94078	1.21005	1.19306	1.32631	1.77429	1.54671	1.21182	1	0.909799	1.00236	0.954462	1.22388	1.35239	1.35307	1.30135	1.12651	1.23218	1
CCDC9	1.06669	1.08892	1.11603	0.86707	0.914662	0.851065	0.995382	1.17902	1.31538	1	1.13078	1.13421	1.0858	0.859928	0.901769	0.898022	1.41558	1.40686	1.37168	1	1.26304	1.25933	1.22512	0.82103	0.837632	0.834257	1.21182	1.13288	1.41309	1
CCDC90B	0.421904	0.40791	0.402423	1.85873	1.76746	2.14531	0.891096	1.0225	0.797746	1	0.270089	0.24399	0.276857	2.32319	2.11093	2.5158	0.636633	0.821338	0.487255	1	0.410158	0.458259	0.392845	2.33114	2.44382	2.80489	1.06936	1.05338	0.672672	1
CCDC91	1.579	1.58633	1.5578	0.738202	0.735309	0.674377	0.644848	0.61306	0.793788	1	1.40029	1.42463	1.40614	0.71297	0.666225	0.641844	0.531189	0.532953	0.450369	1	1.6228	1.54416	1.62351	0.81876	0.728039	0.614129	0.577024	0.593022	0.539997	1
CCDC92	1.15168	1.1347	1.17849	1.03215	0.95996	0.928945	0.615289	0.700396	0.917851	1	1.38755	1.32235	1.4778	1.06287	1.00611	1.02575	0.868546	0.899007	1.04251	1	1.52468	1.59913	1.60025	1.11536	0.877704	0.752285	0.552933	0.593985	0.698221	1
CCDC93	1.51816	1.50441	1.51374	0.846274	0.852286	0.835987	0.44998	0.536892	0.559791	1	1.5932	1.48932	1.59409	0.770084	0.791836	0.708746	0.506928	0.572918	0.635515	1	1.3165	1.43351	1.49448	0.855291	0.820814	0.788751	0.598206	0.627083	0.465165	1
CCDC94	0.968196	0.915558	0.935196	0.877418	0.875177	0.986181	1.07744	1.56124	1.72738	1	0.997411	0.871861	0.953436	1.12207	1.18033	1.17484	1.43642	1.41669	1.16513	1	1.0048	0.906006	0.902505	0.936169	0.86998	1.03453	1.548	1.36663	2.01932	1
CCDC97	1.22097	1.2408	1.17026	1.13039	1.19126	1.22372	0.684187	0.808104	0.697985	1	1.17793	1.16769	1.18577	1.16995	1.17553	1.22774	0.665162	0.710388	0.709885	1	1.26058	1.28072	1.17032	1.1232	1.08268	1.12165	0.734444	0.755942	0.605751	1
CCL5	0.248155	0.26847	0.256206	0.645591	0.577092	0.534639	2.0091	1.15083	1.38776	1	0.360211	0.38307	0.363116	1.65074	1.50823	1.65689	2.31958	2.2775	2.02142	1	0.720921	0.734325	0.595154	2.4814	2.67777	2.00434	4.46447	3.25131	3.49819	1
CCM2	1.19699	1.04631	1.12086	1.04806	1.16586	1.32256	0.740781	0.832378	0.764582	1	1.1673	1.09928	1.13232	1.21678	1.33057	1.37202	0.689893	0.79224	0.551399	1	1.27401	1.25341	1.45715	1.15292	1.09431	1.09112	0.794578	0.789178	0.582043	1
CCNH	0.549991	0.526181	0.63877	1.10219	1.17341	1.20314	2.31093	1.96467	2.38906	1	0.700123	0.68102	0.664082	1.30036	1.19489	1.37275	2.50918	2.31674	2.05803	1	0.65181	0.680218	0.640646	1.44799	1.31658	1.27945	2.08524	2.23252	3.16418	1
CCNK	0.508242	0.475427	0.445175	1.29358	1.30307	1.47745	1.24684	1.61945	1.60958	1	0.493855	0.493424	0.496568	1.58728	1.38413	1.71776	1.89015	1.96823	1.79544	1	0.390501	0.484571	0.510044	1.71304	1.69709	1.82717	1.86001	1.70163	1.91763	1
CCNL1	0.279933	0.268483	0.279864	1.76447	1.81626	2.27548	1.32255	1.32409	1.37998	1	0.502286	0.621675	0.540012	1.61952	1.817	1.77574	1.47743	1.21316	0.938795	1	0.208206	0.201096	0.226896	1.91133	1.78853	1.99549	2.20641	1.76685	2.24076	1
CCNL2	0.495619	0.562717	0.468943	1.8695	1.71301	2.0596	0.940745	0.983695	0.828143	1	0.73142	0.745477	0.595825	1.58553	1.57771	1.7856	1.1135	1.13537	0.637323	1	0.674526	0.744248	0.674188	1.99632	2.16778	2.07024	1.38477	1.04743	1.19858	1
CCNT1	0.301457	0.291272	0.352385	1.30271	1.28196	1.50322	1.63465	2.12704	2.02452	1	0.291564	0.255975	0.305871	1.50409	1.30049	1.62709	2.31244	2.17794	1.54958	1	0.421871	0.442919	0.446882	1.60435	1.72107	1.72274	1.80787	1.54661	2.15901	1
CCNT2	0.427632	0.454831	0.420552	1.19256	1.30051	1.45747	2.19752	2.46549	2.93524	1	0.474779	0.348257	0.454309	1.29252	1.32083	1.47209	2.60899	2.26539	2.00976	1	0.355557	0.374958	0.420105	1.37499	1.47649	1.53417	1.93024	1.54517	2.79355	1
CCNY	0.597195	0.563866	0.538494	1.72501	1.66549	2.0812	1.04495	1.17739	0.840633	1	0.500086	0.564414	0.474841	1.58306	1.61897	1.85556	1.15312	1.0696	1.33163	1	0.888472	0.947504	0.840956	1.33686	1.51626	1.66179	0.815722	0.935284	0.601312	1
CCP110	1.12624	1.2066	0.973992	1.04394	0.837312	1.06265	1.3354	1.36737	1.57434	1	1.04722	1.28702	1.25948	0.770509	0.789007	0.831012	1.54952	1.08341	1.15352	1	1.58671	1.65855	1.5266	0.854674	0.830625	0.800411	1.86701	1.58868	1.97548	1
CCR2	0.501976	0.599833	0.592878	1.70158	1.3963	1.75095	0.92566	1.01993	0.749964	1	0.713077	0.675849	0.691621	3.05222	2.65481	3.22999	1.51853	1.60143	1.03685	1	0.565968	0.614793	0.599154	1.77969	1.82394	2.07226	0.658541	0.779764	0.678033	1
CCR6	0.237957	0.209447	0.225581	2.56761	2.36323	2.88179	1.34931	1.1721	0.954282	1	0.310544	0.273123	0.352936	4.43139	4.46844	5.08523	1.46405	1.52617	0.939529	1	0.167548	0.128558	0.174124	1.70701	1.84314	2.28533	0.704465	0.629679	0.348133	1
CCR7	0.682574	0.556207	0.672613	1.60562	1.47904	1.9343	0.689519	0.800128	0.57976	1	0.441011	0.456183	0.449002	1.64148	1.42302	1.70446	0.667475	0.891449	0.853694	1	0.762245	0.861562	0.778454	1.41956	1.45817	1.86768	1.16162	1.10752	1.18733	1
CCS	1.42327	1.42831	1.3903	0.797518	0.763456	0.75166	0.827185	0.901008	0.849875	1	1.44077	1.40272	1.36445	0.735198	0.73944	0.593475	0.735914	0.747892	0.828026	1	1.68794	1.69566	1.64649	0.758478	0.722528	0.663548	0.534566	0.523095	0.544865	1
CCSER2	0.952205	1.09164	0.940175	1.16675	1.32019	1.2525	1.50787	1.08023	1.90836	1	1.89135	2.0281	1.78693	1.75681	1.96418	1.33742	1.63001	1.49663	1.5104	1	1.48127	1.48596	1.52654	0.942939	0.744623	0.833505	1.01563	1.22988	1.23184	1
CCT2	1.45101	1.46782	1.48557	0.886317	0.891796	0.767245	0.600132	0.598537	0.626627	1	1.47596	1.48681	1.47154	0.818095	0.842634	0.713867	0.45351	0.480836	0.469708	1	1.44298	1.48939	1.52335	0.807998	0.735797	0.674153	0.529742	0.543079	0.519675	1
CCT3	1.47479	1.53306	1.49213	0.817206	0.803208	0.722651	0.606865	0.622585	0.638285	1	1.47843	1.50662	1.45329	0.818135	0.8269	0.697836	0.52941	0.559134	0.603162	1	1.50245	1.51149	1.52838	0.82562	0.769236	0.718185	0.691536	0.689081	0.753369	1
CCT4	1.49392	1.54059	1.55583	0.891074	0.86781	0.763757	0.621894	0.643322	0.608427	1	1.46914	1.54212	1.53141	0.810254	0.841846	0.690598	0.45667	0.534887	0.581801	1	1.49997	1.53946	1.54522	0.837082	0.797363	0.7311	0.605896	0.656806	0.612076	1
CCT5	1.45205	1.5006	1.48224	0.909768	0.920302	0.82021	0.654252	0.656953	0.656531	1	1.50888	1.54469	1.50535	0.859514	0.877337	0.753243	0.565588	0.566423	0.616544	1	1.52719	1.5403	1.5371	0.837836	0.77031	0.711499	0.58693	0.614079	0.615856	1
CCT6A	1.47595	1.50435	1.48735	0.861164	0.852216	0.759465	0.59992	0.600009	0.559823	1	1.48968	1.47066	1.49736	0.820861	0.806986	0.741549	0.452762	0.507149	0.533953	1	1.5538	1.58418	1.54971	0.841199	0.782564	0.746143	0.55194	0.597562	0.577217	1
CCT7	1.4632	1.45319	1.53687	0.877493	0.866056	0.771253	0.711777	0.704614	0.87472	1	1.40126	1.44637	1.41546	0.872439	0.882386	0.770877	0.707633	0.718423	0.854934	1	1.46265	1.44738	1.47807	0.840142	0.769457	0.708683	0.699175	0.720328	0.712653	1
CCT8	1.5261	1.56164	1.53344	0.871079	0.843986	0.736369	0.622614	0.595688	0.607549	1	1.44912	1.48811	1.4499	0.827829	0.860971	0.728503	0.527944	0.554547	0.582695	1	1.52728	1.57755	1.56779	0.811185	0.743951	0.699742	0.536903	0.591643	0.557453	1
CD101	0.815606	0.820467	0.844942	2.75679	2.5619	2.99385	1.27123	1.23558	1.10395	1	0.547147	0.585741	0.418248	0.999261	0.93224	1.19464	0.978935	0.706961	0.695971	1	0.945494	0.78629	0.769954	1.42638	1.40011	1.55266	1.57477	1.45884	2.72325	1
CD151	0.553232	0.386649	0.426742	2.09917	1.83689	2.20889	0.969006	0.876636	0.675737	1	0.482847	0.478535	0.464052	2.39892	2.0733	2.43789	1.06931	1.21797	0.696151	1	0.507114	0.538502	0.475911	2.00348	2.23561	2.28902	1.03494	1.24327	0.675603	1
CD2	0.483935	0.490809	0.472226	1.77936	1.57056	1.86676	1.0319	1.10372	0.846375	1	0.505694	0.488038	0.511582	2.16871	1.98609	2.31018	1.115	1.22565	0.849112	1	0.574942	0.551271	0.614143	2.17201	2.25362	2.48706	1.19607	1.09626	0.702913	1
CD200	0.736149	0.721142	0.783847	2.54921	2.87164	3.12058	0.892478	1.19236	1.10419	1	0.510451	0.411667	0.409977	1.24754	1.30296	1.4581	0.39713	0.77696	0.658879	1	0.667229	0.568237	0.724538	2.23422	2.73974	2.53292	1.13813	1.09738	0.677023	1
CD200R1	0.586738	0.611178	0.572128	1.68139	1.62453	1.72418	0.943962	1.01567	0.803638	1	0.509331	0.613771	0.515733	1.93595	1.62438	2.00441	1.63023	1.66383	1.27844	1	0.547576	0.502337	0.540727	1.46444	1.17874	1.54542	0.7457	1.03417	0.885454	1
CD226	0.62544	0.591793	0.598801	1.95816	1.74741	1.98216	0.84692	1.10313	0.986329	1	0.640124	0.631715	0.736059	2.27773	2.12714	2.62049	1.26281	1.45802	0.879983	1	0.408058	0.380921	0.578844	2.35943	2.22469	2.51281	1.00002	0.978389	0.487639	1
CD247	0.423499	0.399337	0.391692	1.63206	1.58625	1.69251	0.99421	1.1571	1.20131	1	0.382572	0.358663	0.384706	1.80854	1.67938	1.98239	1.1873	1.1658	0.822625	1	0.47563	0.484223	0.486548	2.0236	2.10269	2.41836	1.19589	1.23023	1.01809	1
CD27	0.435662	0.417401	0.493204	2.36629	2.03708	2.25158	0.88247	0.976536	0.62645	1	0.31022	0.308945	0.297142	1.85834	1.79467	2.15852	0.840944	0.934338	0.836986	1	0.33511	0.356566	0.398595	1.74308	1.55316	1.87675	0.752163	0.846802	0.834818	1
CD274	0.364076	0.42843	0.282321	1.84429	1.79935	1.68406	0.825069	1.16189	1.02236	1	0.499967	0.740083	0.438014	1.70957	1.52038	1.91925	0.851002	0.952475	0.945406	1	0.566539	0.540525	0.531986	2.29236	1.88091	2.1248	0.910805	0.989187	0.666044	1
CD28	0.381824	0.35992	0.346456	1.6982	1.25505	1.23812	0.919008	1.32062	1.26716	1	0.625968	0.53401	0.692674	1.99914	1.36806	1.43446	1.68188	1.43562	1.30475	1	0.555048	0.568062	0.614161	1.81273	1.88607	1.68641	1.00493	1.17174	1.14488	1
CD2AP	1.41593	1.37212	1.42511	0.82949	0.785583	0.755379	0.557454	0.599897	0.4777	1	1.4414	1.51351	1.58356	1.04588	0.98448	0.886273	0.743419	0.753213	0.644789	1	1.42255	1.44338	1.43295	0.837506	0.826812	0.722063	0.657974	0.66114	0.667392	1
CD2BP2	0.524356	0.501862	0.56078	1.01081	1.08559	1.19282	1.81937	2.01838	2.43944	1	0.653555	0.621347	0.625474	1.19943	1.20961	1.37445	2.52981	2.092	2.02996	1	0.604893	0.629027	0.584174	1.2528	1.30336	1.31944	1.95075	1.71531	2.63268	1
CD300A	0.543165	0.539306	0.540998	1.97111	1.79528	2.05638	1.39307	1.42234	1.17759	1	0.528788	0.458888	0.544019	2.4478	2.18406	2.65293	1.16818	1.52926	1.20708	1	0.406621	0.380441	0.473688	1.79573	1.44341	1.90993	1.22836	1.07576	0.725241	1
CD37	0.400079	0.395565	0.386197	1.52815	1.46145	1.7718	0.868846	0.834378	0.72485	1	0.438567	0.454134	0.376338	2.25728	2.06703	2.55959	0.952558	1.14772	0.779866	1	0.530063	0.491465	0.402103	1.77865	2.17738	2.31855	0.769851	0.859378	0.532674	1
CD38	0.535109	0.587227	0.500737	1.29865	1.29289	1.28982	0.666876	0.958829	0.800112	1	0.329159	0.350447	0.37582	1.26485	1.23052	1.34181	0.641137	0.780439	0.663178	1	0.560468	0.580516	0.593899	1.99603	1.82003	2.15891	1.00858	0.964187	0.462264	1
CD3D	0.520771	0.529498	0.515338	1.79943	1.67165	1.82854	0.977281	1.14218	1.22097	1	0.489904	0.490734	0.519394	1.98677	1.85225	2.11649	1.36759	1.38591	1.18143	1	0.588162	0.595868	0.565064	1.74073	1.60397	1.89856	1.17824	1.20745	1.1809	1
CD3E	0.532771	0.52101	0.523632	1.64649	1.49782	1.56662	0.970666	1.09001	1.08039	1	0.481894	0.504785	0.480696	1.84463	1.56299	1.84184	1.10005	1.12434	0.837766	1	0.545667	0.544251	0.563763	1.86578	1.73061	1.99722	1.06635	1.13177	1.16652	1
CD3EAP	0.453103	0.379956	0.451535	0.597296	0.534886	0.643072	1.94406	3.57802	4.44347	1	0.433634	0.534566	0.458359	0.685829	0.620516	0.669566	4.76413	4.36391	3.52165	1	0.466747	0.449541	0.273175	0.629635	0.632713	0.681216	2.95263	2.66425	2.76147	1
CD3G	0.41706	0.440701	0.428709	1.70418	1.72112	1.78983	1.1629	1.15763	1.29424	1	0.299299	0.27777	0.308102	2.11398	2.04156	2.07534	1.33394	1.19127	1.07502	1	0.378456	0.386458	0.352345	1.91166	2.09222	2.29363	1.09479	1.08533	1.05025	1
CD4	0.444336	0.448683	0.470432	1.75438	1.60853	2.0048	1.07552	1.10619	1.17313	1	0.453684	0.426313	0.475969	1.9173	1.83341	2.22462	1.35402	1.62681	1.33939	1	0.505983	0.590243	0.661565	1.86058	1.92228	2.12887	1.28044	1.17853	1.32081	1
CD40LG	0.458714	0.430822	0.441502	1.19229	1.28631	1.62848	0.61681	0.764843	0.593793	1	0.720959	0.660446	0.748884	1.64023	1.54482	2.0308	0.754591	0.938214	0.483832	1	0.711938	0.666904	0.698972	1.79062	2.14355	2.38263	1.09927	1.14589	0.8047	1
CD44	0.491985	0.503149	0.481977	1.92332	1.78438	1.92187	1.18995	1.16186	1.10213	1	0.487925	0.503315	0.521696	2.35656	2.21226	2.50513	1.18943	1.35463	0.989759	1	0.51739	0.541234	0.54699	1.75529	1.84519	2.07066	1.01117	0.979928	0.704806	1
CD46	0.536864	0.499684	0.583969	1.76679	1.49026	1.62189	0.88542	0.994806	0.77359	1	0.425341	0.36316	0.409413	2.12211	1.85808	2.03806	0.98444	1.19326	0.817392	1	0.446825	0.518918	0.515235	2.11343	1.90708	2.05492	1.03077	1.02101	0.731514	1
CD47	0.424442	0.437599	0.448009	1.85475	1.73993	1.98054	1.05341	1.23089	0.973822	1	0.33169	0.325858	0.365443	2.0909	1.96704	2.26276	0.998465	1.13592	0.817911	1	0.414057	0.432763	0.450686	2.10611	2.23475	2.44207	0.976074	1.00428	0.736287	1
CD48	0.484038	0.461558	0.485522	1.97019	1.83149	1.96189	0.835696	0.972586	0.737795	1	0.467089	0.477705	0.492585	2.12601	1.98943	2.16045	0.764253	0.859229	0.65474	1	0.536214	0.577532	0.582221	1.89376	2.01925	2.24299	1.15006	1.0224	0.652686	1
CD5	0.400959	0.362121	0.378147	1.88554	1.74427	1.87897	0.884987	1.02172	0.803614	1	0.351131	0.313915	0.365781	2.19359	2.03467	2.45329	1.1681	1.17054	0.757031	1	0.412624	0.410832	0.447755	1.9674	2.15917	2.23312	0.963312	0.978421	0.711694	1
CD53	0.579734	0.605071	0.582201	1.58779	1.43485	1.53522	1.01205	0.990551	0.963659	1	0.581395	0.570879	0.615343	1.95327	1.77148	2.02737	0.99257	0.996078	0.938204	1	0.55845	0.585592	0.641065	1.76129	1.8342	1.9202	0.941608	0.994098	0.804846	1
CD55	0.841078	0.807301	0.864698	2.175	2.0427	2.15742	1.1432	1.25909	1.16092	1	0.528044	0.468899	0.569231	1.73186	1.73044	1.74241	0.868251	0.918592	0.874274	1	0.59916	0.532931	0.639334	1.55489	1.66149	1.62836	1.04034	0.9537	1.03988	1
CD58	0.719416	0.680906	0.752771	1.74019	1.72298	1.69107	1.03635	1.01515	0.87808	1	0.299513	0.258112	0.396171	2.74655	2.29649	2.98088	2.23915	1.61341	1.59168	1	0.797535	0.809186	0.845043	1.22262	1.35291	1.48298	0.769334	0.79631	0.794548	1
CD59	0.652991	0.715289	0.645586	1.79069	1.59227	1.60971	0.893608	0.977146	0.848076	1	0.460388	0.420899	0.492937	1.85334	1.56901	2.16545	0.806432	0.896881	0.638471	1	0.57969	0.62287	0.670602	1.64916	1.67523	1.90563	0.960145	0.892977	0.710389	1
CD6	0.486656	0.498232	0.505935	1.93234	1.79412	2.00584	1.15089	1.29724	1.05661	1	0.539157	0.452916	0.524451	1.79516	1.63795	2.10604	1.16669	1.2298	1.09187	1	0.658479	0.604438	0.618294	1.60939	1.77691	1.83988	1.07055	1.0667	1.03317	1
CD63	0.146638	0.148857	0.162962	1.73244	1.5104	1.73529	0.762433	0.937266	0.771611	1	0.258074	0.267494	0.270512	1.67054	1.75037	1.91453	1.85748	1.74779	1.56897	1	0.391982	0.243989	0.403808	1.735	1.7128	2.0474	1.13093	1.65355	1.46842	1
CD7	0.743389	0.671067	0.678926	1.70169	1.61368	1.66758	1.49301	1.65688	1.97408	1	0.54832	0.419922	0.460633	1.17052	1.43869	1.40576	1.23773	1.02457	0.863589	1	0.653704	0.659961	0.583552	1.6735	1.81854	2.0609	1.03922	1.258	0.873485	1
CD74	0.188722	0.18622	0.21155	1.41832	1.27199	1.53049	0.702294	0.780357	0.451638	1	0.583938	0.603631	0.642101	2.12944	2.05269	2.27672	0.860375	0.992414	0.823108	1	0.596051	0.547668	0.568701	1.97842	1.95123	2.11309	1.15527	1.12708	0.877081	1
CD81	0.496123	0.275284	0.414608	1.3977	1.32555	1.50064	0.957469	0.784749	1.04053	1	0.471316	0.459589	0.486197	2.23485	2.13663	2.25135	0.53821	0.649944	0.481489	1	0.452864	0.441785	0.397852	2.433	2.58021	2.90915	0.826538	0.978198	0.5391	1
CD82	0.517698	0.57072	0.578619	2.02345	1.77132	1.9805	0.964602	0.986259	0.718851	1	0.656198	0.669767	0.705256	2.42401	2.19245	2.50247	0.893373	1.0634	0.780325	1	0.478527	0.499835	0.487527	1.59267	1.62761	1.85047	0.701395	0.914756	0.814906	1
CD84	0.687197	0.604916	0.708549	2.35144	2.22119	2.44873	0.99276	1.24064	0.945362	1	0.350431	0.404013	0.41744	2.17495	2.30389	2.41096	1.15708	1.06566	0.687397	1	0.272166	0.457951	0.700754	2.04733	2.21013	2.15908	1.04374	1.16285	0.618753	1
CD9	0.408101	0.392545	0.380638	1.84417	1.54352	1.81857	0.931103	0.900729	0.709336	1	0.227501	0.192973	0.271624	1.33725	1.24853	1.35149	1.16034	1.2386	1.36744	1	0.361974	0.400861	0.384862	1.40057	1.45879	1.52893	1.13306	0.999597	1.05769	1
CD96	0.471165	0.537966	0.584227	1.6933	1.50952	1.62799	1.09695	0.923858	0.908085	1	0.630784	0.67134	0.576595	2.23645	1.72485	2.21768	1.00006	0.994435	0.938799	1	0.306807	0.381913	0.381786	1.99014	2.38209	2.47103	0.902055	0.963322	0.92998	1
CD99	0.333494	0.323261	0.381455	2.06289	1.91095	2.00087	1.09262	1.26078	1.01519	1	0.399323	0.384723	0.4464	2.44188	2.40154	2.66126	1.29429	1.34825	0.818087	1	0.400224	0.409459	0.480353	1.87119	1.89105	2.25551	1.05298	1.03863	0.711132	1
CD99L2	0.248845	0.237767	0.287731	1.52013	1.30521	1.56013	0.763292	0.893037	0.730574	1	0.564998	0.608283	0.592245	2.63666	1.7757	2.49019	0.923003	1.27379	0.771827	1	0.625197	0.484651	0.709177	1.99081	1.82445	2.23989	0.645028	0.915855	0.469602	1
CDAN1	1.34384	1.28321	1.29124	1.02629	0.771377	0.975473	0.808752	0.657117	0.731627	1	1.89246	1.88631	1.83607	0.871127	0.925291	0.692651	0.853726	0.658772	0.856324	1	1.42987	1.34131	1.51989	0.923352	0.820241	0.831448	0.599161	0.695223	0.682311	1
CDC123	1.21119	1.18014	1.41679	0.77282	0.688266	0.674111	0.602252	0.707132	0.586237	1	1.62824	1.74776	1.567	0.615317	0.702307	0.511655	0.325934	0.391538	0.310932	1	1.66819	1.52471	1.51132	0.732778	0.628989	0.595522	0.565833	0.692097	0.6386	1
CDC16	0.982545	0.992848	0.989763	0.703613	0.677095	0.672412	2.35304	1.86998	2.72778	1	0.977858	1.15551	0.938408	0.766405	0.746998	0.792858	2.66454	2.38808	2.13575	1	1.02186	0.905239	1.13597	0.650418	0.756686	0.627622	1.9613	1.96512	2.9193	1
CDC23	1.01068	1.00141	0.958279	0.596281	0.638993	0.634277	2.57646	1.90045	2.4863	1	1.10197	1.10251	1.08071	0.717227	0.730058	0.681721	2.4922	2.18092	2.20565	1	1.01128	1.07156	1.10514	0.78124	0.766089	0.75594	1.45902	1.34165	2.12765	1
CDC26	1.23425	1.33778	1.36196	0.833869	0.737151	0.696131	1.97527	1.1404	1.77886	1	1.37044	1.40482	1.64281	0.798636	0.804695	0.674644	1.25324	1.25024	1.71679	1	1.13128	1.07856	1.32868	0.820487	0.808364	0.73073	2.16152	1.78982	2.29879	1
CDC27	0.767699	0.711407	0.694072	0.506588	0.550539	0.464707	3.27931	2.8997	4.12215	1	0.916765	0.930952	0.854741	0.639092	0.734461	0.609429	4.18232	3.24697	3.77655	1	0.784546	0.807628	0.785349	0.625005	0.687304	0.668651	2.89796	2.37894	4.41351	1
CDC37	1.46425	1.4986	1.4643	0.918796	0.939046	0.852825	0.625671	0.673299	0.741784	1	1.39205	1.44058	1.4064	0.955568	0.993239	0.909716	0.605941	0.576316	0.539531	1	1.36545	1.42959	1.35303	0.85586	0.819186	0.779537	0.62544	0.634267	0.577486	1
CDC37L1	1.45043	1.28207	1.45505	0.844984	0.790802	0.714826	0.648864	0.69055	0.659384	1	1.5898	1.50045	1.57275	0.696456	0.781265	0.717164	0.491743	0.605369	0.561091	1	1.34811	1.36947	1.45833	0.724686	0.688779	0.627602	0.613821	0.552576	0.645248	1
CDC40	0.48494	0.404744	0.433081	0.826606	0.902036	0.919681	2.98774	3.0851	3.73951	1	0.44741	0.433896	0.436539	0.754617	0.79116	0.827457	4.24795	3.39324	3.18277	1	0.61295	0.631827	0.606269	0.827295	0.907545	0.901684	3.46401	3.07897	4.14298	1
CDC42	1.3449	1.34535	1.32034	0.998528	1.03003	1.05831	1.11414	1.00762	1.21625	1	1.35482	1.41318	1.26374	0.999583	1.02398	1.20012	0.862596	0.867956	0.784337	1	1.34104	1.40625	1.40518	1.13931	1.12774	1.19577	0.810668	0.789287	0.760078	1
CDC42BPB	1.43668	1.3985	1.37388	1.50624	1.53175	1.63121	1.28284	1.28092	1.68008	1	1.37461	1.38217	1.26212	1.06462	1.03536	1.15989	0.752165	0.778489	1.51552	1	0.99022	1.02798	1.01175	1.27645	1.30151	1.26548	0.620019	0.636882	0.385754	1
CDC42SE1	0.257275	0.29351	0.310232	2.06903	2.14259	2.1787	0.749896	0.716724	0.382705	1	0.313335	0.349294	0.340856	2.50733	2.46626	2.99409	0.601854	0.744595	0.541973	1	0.503943	0.486671	0.492798	2.28408	2.74237	2.76774	1.02349	1.0475	0.711648	1
CDC42SE2	0.387547	0.429451	0.437566	2.37062	2.25951	2.76289	0.705028	0.940709	0.332047	1	0.280109	0.294243	0.257556	2.17142	2.11619	2.79674	0.5217	0.733631	0.217764	1	0.360217	0.367696	0.433046	2.62279	3.08245	2.99358	0.72478	0.853409	0.285019	1
CDC5L	0.278331	0.270062	0.295374	0.599983	0.680622	0.793299	3.73097	4.52001	5.33048	1	0.257688	0.228338	0.262339	0.698762	0.713201	0.773721	5.46185	4.65721	4.43803	1	0.343072	0.367797	0.347293	0.67156	0.823329	0.789901	4.35852	3.52	4.22438	1
CDC73	0.303135	0.296364	0.342392	0.663818	0.643516	0.708522	3.01822	3.86669	4.71893	1	0.300178	0.281693	0.303418	0.786776	0.79183	0.797846	5.02188	4.25745	3.7836	1	0.354566	0.325708	0.331409	0.736699	0.780097	0.713217	4.14876	3.43392	5.51516	1
CDIPT	0.403307	0.462435	0.445128	1.94192	1.75959	2.25943	0.867721	0.899492	0.818325	1	0.401203	0.354386	0.480386	2.06275	1.96417	2.1701	1.01337	1.07176	1.08216	1	0.466359	0.49909	0.508787	1.97276	1.88358	2.22169	1.21439	1.27496	1.31216	1
CDK10	0.497648	0.411584	0.484401	0.89633	0.93355	1.07454	1.86207	2.20243	2.27947	1	0.579067	0.491396	0.587141	1.21211	1.0007	1.09786	3.65568	3.03829	2.94639	1	0.601868	0.636892	0.635158	0.8858	0.912154	0.789901	4.25881	3.27111	4.87568	1
CDK11A	0.890151	0.7565	0.880613	2.54745	2.11127	2.54296	1.10436	1.1526	1.01303	1	0.899665	0.862107	0.95271	1.44241	1.4885	1.7179	1.46734	1.15083	1.65124	1	0.990696	1.16549	1.13608	1.48354	1.46254	1.35997	1.08978	0.999097	1.12485	1
CDK11B	0.475625	0.422725	0.472172	1.34251	1.45468	1.69046	1.41105	1.38143	1.36127	1	0.460421	0.420486	0.433023	2.32847	1.47122	2.32733	1.60147	1.89529	0.751148	1	0.405206	0.533292	0.470366	1.94903	2.06008	2.16829	1.36551	1.51436	1.42971	1
CDK12	0.322814	0.321384	0.317276	1.33266	1.40746	1.45732	2.07876	2.43266	2.82839	1	0.191626	0.166233	0.201972	1.55992	1.44746	1.67942	2.59116	2.31132	2.09756	1	0.256531	0.257056	0.291685	1.76089	1.93508	1.99755	2.10252	1.67728	1.92589	1
CDK13	0.441328	0.482917	0.447797	1.55402	1.50266	1.72839	1.38905	1.49391	1.80602	1	0.361978	0.364657	0.405219	1.70401	1.60534	1.83807	1.76581	1.52015	1.41977	1	0.356604	0.364905	0.38827	1.83662	1.807	1.96452	1.84084	1.5956	1.99093	1
CDK17	1.05494	1.09677	1.11627	1.10429	1.07537	1.18188	1.04341	1.13563	1.1728	1	1.18357	1.19027	1.09444	1.16727	1.11465	1.30695	1.26403	1.1538	1.10381	1	1.02948	1.06963	1.0592	1.23745	1.24773	1.39399	0.977436	1.02061	1.11543	1
CDK2	1.38222	1.5069	1.39355	0.739473	0.775175	0.680167	0.505702	0.479828	0.446133	1	1.55449	1.54174	1.59893	0.74817	0.780972	0.630312	0.43817	0.523659	0.592814	1	1.66516	1.58667	1.52034	0.812306	0.798906	0.671876	0.577943	0.632357	0.55393	1
CDK4	0.764886	0.780903	0.813181	1.01127	0.960308	0.932988	1.21586	1.52794	2.06153	1	1.2468	1.22238	1.30973	0.839324	0.830258	0.608009	0.618353	0.710303	0.704345	1	1.34274	1.29141	1.38291	0.706344	0.925867	0.849644	0.673558	0.650951	0.708043	1
CDK5	1.6724	1.74384	1.77851	0.98907	0.998755	0.931309	0.500909	0.63102	0.622524	1	1.50797	1.47608	1.48227	0.925421	0.885635	0.910486	0.613252	0.657414	0.587331	1	1.3135	1.24095	1.24078	0.8555	0.924787	0.865168	0.687855	0.734617	0.681409	1
CDK5RAP3	0.321329	0.394105	0.366798	1.98467	1.94442	2.26732	1.17744	1.13402	0.99975	1	0.214716	0.270076	0.239254	2.13588	1.95754	2.60206	0.904047	1.06861	0.716264	1	0.25128	0.265929	0.274174	2.07882	2.34848	2.62723	0.996281	1.00762	0.716229	1
CDK6	1.77881	1.74156	1.82008	0.644065	0.736208	0.659457	0.692203	0.482048	0.508335	1	1.75439	1.68819	1.61151	0.612793	0.615919	0.421662	0.761618	0.675546	1.5155	1	1.28828	1.35345	1.38601	0.586978	0.56396	0.536132	0.888116	1.07847	1.16633	1
CDK7	0.751399	0.698493	0.765023	1.01833	1.09178	1.22541	2.55179	2.29117	2.77981	1	0.75997	0.753582	0.687117	1.23347	1.26054	1.254	2.66695	2.54038	2.71649	1	0.579123	0.559357	0.622597	1.41534	1.33642	1.45553	2.29155	2.37449	3.42244	1
CDK9	0.471842	0.47843	0.479941	1.26168	1.26162	1.41459	1.65102	1.75626	1.8269	1	0.34275	0.317324	0.36478	1.45977	1.32467	1.62354	2.16616	2.03547	1.9098	1	0.474508	0.462516	0.425921	1.61397	1.84851	1.79606	1.52433	1.39471	1.81731	1
CDKAL1	0.378261	0.412043	0.399263	2.01752	1.89222	2.28351	0.870331	1.14881	0.87926	1	0.623984	0.653685	0.510807	1.85048	1.65529	2.10792	0.694218	1.04051	0.876483	1	0.512808	0.46013	0.478087	1.92819	2.06997	2.30642	0.902957	0.957583	0.729128	1
CDKN1B	1.29344	1.31467	1.27691	0.736954	0.720695	0.663032	0.639248	0.634954	0.586864	1	1.49053	1.50084	1.51312	0.778981	0.83412	0.789478	0.623399	0.533613	0.61394	1	1.72678	1.73907	1.64874	0.893238	0.704538	0.785532	0.617408	0.579384	0.714987	1
CDKN2AIP	0.469728	0.454339	0.475083	1.32525	1.33605	1.55284	1.6824	1.97063	2.14806	1	0.460405	0.422465	0.436895	1.28074	1.30146	1.54352	2.8576	2.72919	2.29257	1	0.448504	0.474452	0.482113	1.48532	1.50065	1.61785	2.03561	1.76985	1.82387	1
CDKN2AIPNL	0.547678	0.546358	0.611075	1.71006	1.57806	1.83814	0.992272	1.59068	1.46358	1	0.532924	0.53703	0.56523	1.43098	1.42824	1.58211	1.94828	2.09305	1.34349	1	0.477306	0.524535	0.583459	1.57552	1.57891	1.77662	1.12111	1.05464	0.910411	1
CDKN2C	1.63536	1.82557	1.62198	0.805276	0.815474	0.859481	0.885055	0.928079	0.851787	1	1.70267	1.52517	1.57723	0.792813	0.80395	0.744137	0.864435	1.12413	1.45661	1	1.27236	1.14447	1.32108	0.686478	0.66513	0.596102	0.926716	0.395318	0.681754	1
CDR2	0.485022	0.484507	0.517548	1.89655	1.76243	2.0594	0.997001	1.12314	0.885706	1	0.540706	0.504543	0.547501	1.84968	1.79034	1.9474	0.999717	1.12669	0.753699	1	0.488402	0.525393	0.520786	1.78185	2.08481	2.02347	1.30737	1.27891	1.02277	1
CDS2	0.368061	0.401875	0.398509	1.71024	1.68001	1.92195	1.69708	1.43217	1.65126	1	0.367707	0.345895	0.393244	2.12213	2.03522	2.31817	0.912224	1.01711	0.723425	1	0.385977	0.369506	0.398478	1.97162	1.98334	2.37872	1.13101	1.03441	0.631392	1
CDV3	1.72276	1.77941	1.71623	0.706349	0.721088	0.583197	0.475414	0.552823	0.493253	1	1.82293	1.66605	1.79715	0.667022	0.743799	0.55671	0.391701	0.381607	0.347111	1	1.70897	1.65351	1.66683	0.61251	0.556883	0.480994	0.459336	0.510423	0.526096	1
CDYL	0.231145	0.237363	0.22445	0.479493	0.614054	0.523113	3.23866	3.81233	5.05581	1	0.437906	0.457592	0.494051	0.606465	0.643049	0.587489	4.99443	3.93952	4.18258	1	0.364048	0.383197	0.396155	0.699473	0.733465	0.761782	4.66081	3.94033	6.29999	1
CEBPB	0.553929	0.604166	0.509885	0.437358	0.491464	0.24281	2.94113	3.27123	3.6936	1	0.711293	0.590069	0.535548	0.469565	0.701559	0.640456	5.72514	5.31328	4.21929	1	0.379599	0.42466	0.464976	0.815118	0.811323	0.844496	4.54804	3.84363	4.57505	1
CEBPZ	0.205732	0.255167	0.311429	0.274172	0.32989	0.288052	4.75763	3.4337	4.63296	1	0.242252	0.196167	0.247965	0.357256	0.407801	0.435062	5.75613	3.85338	4.65041	1	0.336635	0.247507	0.30515	0.415493	0.464415	0.36215	5.66594	5.46752	10.3857	1
CECR1	0.863343	0.929156	0.815398	0.99386	1.04713	0.93395	0.636222	0.662609	0.556538	1	1.03276	1.15777	1.00112	1.31926	1.25928	1.41314	0.670253	0.856615	0.69847	1	1.22793	1.2929	1.22039	1.58049	1.42256	1.70036	0.760628	0.822921	0.67991	1
CECR5	0.288437	0.311875	0.324464	1.91138	1.72541	2.03713	0.811995	1.04879	0.624458	1	0.328732	0.324254	0.336653	2.35956	1.88827	2.57488	0.767649	0.990448	0.606945	1	0.312813	0.359646	0.392634	1.92251	1.93395	2.2261	0.861883	1.0853	0.469508	1
CELF1	0.446182	0.399929	0.482362	1.64845	1.39145	1.83196	1.46524	1.70716	2.22389	1	0.393512	0.369425	0.427419	1.24253	1.0459	1.55749	2.87006	2.74475	2.5711	1	0.59995	0.589772	0.478241	1.20739	1.30924	1.51075	1.89481	1.80463	1.99302	1
CELF2	0.438295	0.415935	0.462624	1.47916	1.49285	1.67103	1.47765	1.96046	2.07182	1	0.329468	0.331228	0.349033	1.32212	1.20553	1.60097	2.71168	3.17554	2.35985	1	0.450879	0.44891	0.521785	1.28521	1.5411	1.40494	2.2885	1.70441	1.92359	1
CENPB	0.250974	0.26692	0.220153	0.427696	0.443934	0.483178	2.59019	3.99356	4.90325	1	0.259067	0.292868	0.319707	0.437434	0.405466	0.376155	5.12386	6.09553	4.59046	1	0.299238	0.272989	0.268224	0.347495	0.449727	0.420137	5.81357	3.99954	7.26385	1
CENPC	0.268135	0.289052	0.28115	0.286321	0.347787	0.31582	3.73997	4.75968	5.9506	1	0.274212	0.260316	0.276129	0.28763	0.378345	0.333043	5.90155	5.03886	4.85364	1	0.247208	0.270805	0.263382	0.332109	0.410467	0.347319	6.5669	5.28007	8.01173	1
CENPV	0.227757	0.234662	0.255618	0.643015	0.509821	0.590692	2.07587	3.37206	3.547	1	0.287755	0.230081	0.249619	0.469386	0.464813	0.611232	4.32395	3.85646	3.59558	1	0.311481	0.326471	0.417112	0.699655	0.7541	0.882066	4.88322	3.86943	5.00719	1
CEP120	0.478688	0.513498	0.50015	0.695852	0.694411	0.773555	2.41517	2.75135	3.34936	1	0.473441	0.403907	0.413306	0.561281	0.590578	0.594336	3.49641	3.53092	2.92665	1	0.508202	0.522566	0.490577	0.500584	0.542664	0.52267	4.77604	4.44063	6.17522	1
CEP131	0.658463	0.890268	0.767652	0.927271	1.17908	1.07785	1.17138	1.12088	1.1318	1	0.888987	0.741104	0.994359	1.27121	1.33316	1.23933	1.60328	1.38626	2.83338	1	0.814921	0.912776	0.856053	1.20565	1.36513	1.2597	1.41513	1.2642	1.36485	1
CEP135	0.897208	0.837987	0.991389	0.698859	0.752307	0.693513	0.848726	1.14167	1.08775	1	1.02763	1.08713	1.05947	0.867619	0.94306	0.897352	1.12798	1.58543	0.98449	1	0.987777	1.02056	1.0265	0.770192	0.873448	0.842334	2.01519	2.22029	1.72048	1
CEP170	1.12316	1.09384	1.10182	1.10054	1.08385	1.23105	0.978052	1.25029	1.4861	1	0.893602	0.90067	0.93351	1.00594	0.935714	1.09323	1.1753	1.02787	1.07064	1	1.1379	1.07397	1.09162	1.09311	1.12436	1.18664	1.14236	1.21573	1.18397	1
CEP250	0.805335	1.02066	0.83208	0.862179	0.972486	0.919728	1.16067	1.18575	0.664733	1	1.16301	0.989784	1.22771	0.770739	0.718605	0.650957	1.28072	1.94678	1.28491	1	1.09639	1.14199	1.01814	0.831889	0.861164	0.830873	2.01056	2.65227	1.38194	1
CEP41	1.0151	0.984975	0.98495	0.739423	0.701388	0.74647	1.00461	1.54137	2.29633	1	0.814519	0.79027	0.805322	0.716307	0.772253	0.650381	2.37992	2.0923	2.07819	1	1.05817	0.964775	0.921593	0.650379	0.648878	0.627809	2.74081	2.56521	3.22501	1
CEP68	0.779421	0.964411	0.816507	1.15989	1.02569	1.11972	0.837444	1.16491	1.19608	1	1.69815	1.96184	1.43003	1.98608	1.2811	1.3317	2.33413	3.25161	2.03604	1	1.50718	1.1683	0.939108	0.881375	1.20987	1.04025	0.772939	1.1956	1.25049	1
CEP97	1.26074	1.3253	1.39821	0.654783	0.708173	0.707068	0.72137	0.84878	0.803755	1	1.56016	1.85006	1.57265	0.82013	0.820253	0.65928	0.955418	0.460531	0.676064	1	1.4496	1.46106	1.52052	0.850601	0.827092	0.660204	0.60951	0.682561	0.828501	1
CERK	0.722706	0.650582	0.632478	1.53062	1.4839	1.65169	1.81516	1.4947	1.82522	1	0.812456	0.889359	0.940687	1.54465	1.19789	1.45424	0.934759	1.54043	1.73431	1	0.625128	0.736374	0.739041	1.4553	1.40432	1.44174	1.63133	2.03037	2.33651	1
CERS2	0.524179	0.546209	0.551503	1.84907	1.65127	2.0653	0.79304	1.0434	0.732714	1	0.485033	0.433291	0.487427	1.91816	1.55443	2.17842	0.852149	0.954027	0.759527	1	0.604546	0.518348	0.724385	2.03449	2.03264	2.14904	1.13809	1.31406	0.962939	1
CERS5	0.241383	0.234503	0.242005	2.23923	1.94953	2.61688	2.09529	1.45798	1.45772	1	0.218943	0.152759	0.178429	2.53036	2.00057	2.70801	1.33797	0.974073	0.711811	1	0.382609	0.482001	0.431083	1.78408	1.90794	2.02624	1.33902	1.06799	1.86202	1
CETN2	0.473836	0.493724	0.463645	0.459854	0.495916	0.515327	3.04735	4.20866	5.19873	1	0.451608	0.462082	0.518966	0.587198	0.598181	0.655425	5.23376	4.56878	3.95892	1	0.558387	0.554217	0.535167	0.854415	0.833675	1.03133	4.42218	3.68774	3.54844	1
CETN3	1.09296	1.11169	1.13587	0.938699	0.91974	0.856842	0.908822	1.17174	1.13363	1	0.963336	0.955061	0.985478	0.845693	0.830722	0.874127	1.26524	1.3586	1.00875	1	1.00529	0.985935	0.938469	0.954802	0.960032	1.02497	1.48955	1.74921	1.62458	1
CFAP20	0.943902	0.948406	1.18782	0.791927	0.822183	0.73618	1.05652	1.14684	1.33987	1	0.949572	1.0235	1.04915	0.880367	0.77448	0.85135	1.36873	1.42564	1.30716	1	1.28789	1.42422	1.76765	1.0805	0.852686	0.863029	1.65218	1.38331	1.95806	1
CFAP36	1.82951	1.80831	1.86352	0.624574	0.652326	0.570197	0.693349	0.560583	0.838747	1	1.6865	1.7056	1.68488	0.583631	0.683463	0.430448	0.589251	0.516577	1.16642	1	1.62471	1.63978	1.7223	0.641359	0.553395	0.494552	0.651852	0.457856	0.695677	1
CFAP46	0.442574	0.433688	0.410951	0.835693	0.889971	0.987033	2.41843	2.78956	3.70266	1	0.250012	0.307699	0.17734	1.29579	1.44892	1.42496	3.68225	2.89918	2.55164	1	0.366148	0.344606	0.350323	1.51984	1.42931	1.64753	2.48358	2.38334	2.76312	1
CFAP97	1.12683	1.15788	1.1288	1.11431	1.05091	1.18925	1.10658	1.2374	1.45274	1	0.962993	1.1734	1.00409	1.17305	1.06427	1.04911	1.91117	1.14258	1.55649	1	1.44097	1.32181	1.52866	0.721745	0.715094	0.678992	0.402114	0.479319	0.439243	1
CFDP1	1.22721	1.23239	1.21067	1.08108	1.09843	1.1749	0.767275	0.967896	0.922027	1	1.2575	1.13577	1.15273	1.07807	1.18878	1.25229	0.75561	0.838112	0.627544	1	1.19804	1.22299	1.16202	1.09119	1.0314	1.10315	0.823697	0.750481	0.8115	1
CFH	0.759881	0.89088	0.787522	1.70536	1.74211	1.31951	4.86614	1.72705	2.62504	1	1.16637	1.31617	0.829866	1.20973	1.14098	1.02797	2.26778	1.87948	2.26369	1	1.62931	1.21134	0.990794	1.4271	0.909082	1.12013	2.69205	2.21356	2.99598	1
CFL1	1.67493	1.68114	1.62863	0.700672	0.710227	0.590575	0.552186	0.624538	0.69304	1	1.73212	1.74102	1.64038	0.67896	0.749684	0.632416	0.574538	0.601332	0.48507	1	1.76424	1.84275	1.72045	0.666964	0.590068	0.550567	0.503798	0.542779	0.547357	1
CFL2	1.20684	1.08756	1.18037	0.925122	0.778666	0.693553	1.08773	1.52851	1.60591	1	1.34068	1.12308	1.23106	0.917998	0.950586	0.873352	1.25149	1.10269	1.66806	1	1.66247	1.56437	1.72771	0.926535	1.0508	1.06016	0.821911	0.85074	0.940227	1
CGGBP1	0.509685	0.504701	0.471302	0.949445	0.871184	0.898304	2.3462	2.92957	3.87973	1	0.512774	0.481812	0.531607	0.893099	0.831291	0.992617	3.45646	3.51739	3.21232	1	0.48759	0.504962	0.520607	1.06684	1.13716	1.25343	3.05865	2.77429	3.10928	1
CGRRF1	0.658681	0.810066	0.653341	1.1659	1.33064	1.37072	1.28581	1.11139	1.27888	1	1.25215	1.1145	1.04097	1.69598	2.3405	2.06371	0.505017	1.32296	2.02473	1	0.609095	0.584062	0.574705	1.22368	1.75105	1.28857	0.988031	1.12268	1.16818	1
CHAMP1	0.436438	0.390803	0.413717	0.987045	1.03515	1.07778	2.61511	3.26993	3.49741	1	0.325299	0.340813	0.349458	1.09286	1.01648	1.26676	3.4984	2.98606	2.82907	1	0.396556	0.424213	0.422931	1.3053	1.38799	1.42695	3.39373	2.57417	3.00951	1
CHCHD1	0.356178	0.377253	0.307542	1.4945	1.47506	2.01544	1.42324	1.61547	1.61442	1	0.434373	0.512175	0.511113	1.65909	1.52271	1.77771	1.54469	1.45696	1.49633	1	0.152766	0.198028	0.209196	2.53474	2.4489	2.88108	2.572	2.16739	1.70593	1
CHCHD10	0.93299	0.95713	0.905349	1.33363	1.18558	1.18969	0.606354	0.865077	0.99297	1	0.611799	0.775853	0.65166	1.88921	1.69631	1.93758	0.844593	0.958244	1.16983	1	1.35607	1.51785	1.05199	1.51936	1.38731	1.59634	1.45182	1.33896	1.18081	1
CHCHD2	0.296656	0.359238	0.185307	1.42462	1.62686	1.87048	0.686818	0.625468	0.220099	1	0.372175	0.345889	0.375505	2.11265	2.00082	3.07813	0.522645	0.787129	0.396973	1	0.22291	0.238685	0.292987	2.72447	2.96933	3.0575	0.744805	0.650572	0.106851	1
CHCHD3	0.302704	0.302128	0.331534	1.96996	1.98016	2.14055	0.975714	1.0198	0.697233	1	0.261629	0.248334	0.267353	2.05275	1.75686	2.24866	0.818964	1.03933	0.728774	1	0.395261	0.363762	0.372977	2.0058	2.16054	2.32211	1.15248	1.27314	0.809302	1
CHCHD4	0.195273	0.220294	0.216339	2.27868	2.02189	2.32932	0.838822	0.755942	0.558128	1	0.130067	0.149309	0.180074	2.6591	2.2358	2.86742	0.586361	0.881291	0.32515	1	0.189496	0.246986	0.299963	2.51592	2.24513	2.55185	0.650677	0.82926	0.37504	1
CHCHD5	0.272038	0.322501	0.360293	1.82185	1.7345	1.90704	1.19412	0.840937	0.569834	1	0.261343	0.263801	0.300284	2.22868	2.56554	2.23551	1.11442	1.15859	0.677519	1	0.653555	0.736024	0.263932	1.26766	1.51482	1.52923	0.942984	0.870616	0.7328	1
CHCHD6	0.240446	0.207411	0.211821	2.18484	2.03059	2.19031	0.781795	0.971138	0.605395	1	0.17392	0.164581	0.155423	2.21375	1.87742	2.35265	0.745349	0.955914	0.542872	1	0.330756	0.236427	0.374979	2.22273	2.44405	2.70724	1.06227	1.20127	0.785056	1
CHCHD7	0.47752	0.423686	0.495724	1.80438	1.77955	1.63001	1.36037	1.01924	1.50128	1	0.505794	0.480463	0.467865	1.66421	2.34254	2.11941	1.45248	1.50086	1.05612	1	0.550498	0.467402	0.486674	1.68699	1.56437	1.78794	1.00835	0.997376	0.887337	1
CHD1	0.490181	0.440644	0.475188	1.0338	1.15373	1.26415	2.59824	1.96735	2.03833	1	0.459553	0.37832	0.435967	1.12618	1.18748	1.3164	2.63639	2.51788	2.40197	1	0.457605	0.539419	0.491394	1.241	1.25243	1.28962	2.27766	2.20057	3.14722	1
CHD1L	0.99891	0.952546	0.993023	1.26559	1.28118	1.36048	1.20549	1.25014	1.25096	1	0.822166	0.780185	0.768179	1.08692	1.09415	1.10885	1.06413	1.00011	0.947713	1	0.846871	0.897316	0.95183	1.58742	1.51608	1.62216	1.12838	1.05092	1.20607	1
CHD2	0.373367	0.322102	0.342266	0.811412	0.874887	1.04954	3.85733	3.03474	3.48943	1	0.416903	0.439549	0.405446	0.930908	0.919751	1.07285	3.52704	3.08982	3.39998	1	0.409859	0.406857	0.361269	0.930708	0.988577	0.987561	3.72099	3.10726	5.21072	1
CHD3	0.406861	0.416458	0.402288	0.93284	1.00087	1.13785	3.02098	2.36543	2.46096	1	0.397353	0.388493	0.393822	1.03477	1.0103	1.14961	2.31603	2.03777	2.25625	1	0.430945	0.473205	0.514325	1.1661	1.33219	1.3195	2.95197	2.5604	3.89599	1
CHD4	0.460641	0.42942	0.444492	0.911729	0.952622	1.05605	3.29923	2.57725	3.07317	1	0.382323	0.377874	0.381368	1.04835	1.06303	1.2084	3.42979	2.78487	3.1533	1	0.494204	0.479663	0.499578	1.24358	1.3756	1.37736	2.73854	2.44903	3.58692	1
CHD6	0.450242	0.449855	0.433054	1.07576	1.14072	1.19054	2.69998	2.46625	2.9945	1	0.560008	0.408634	0.457404	0.975038	0.978698	1.00284	2.63409	2.48137	2.89842	1	0.539473	0.701	0.589309	1.01955	1.12196	1.2034	3.06464	1.84796	2.90723	1
CHD8	0.482814	0.431571	0.466647	1.33974	1.38343	1.55366	2.00344	1.55196	1.66989	1	0.546898	0.529316	0.527261	1.44203	1.47778	1.67572	1.6935	1.65438	1.43115	1	0.497858	0.557177	0.540294	1.67484	1.86095	1.90227	1.52045	1.46315	1.62909	1
CHEK2	1.39528	1.31425	1.31405	1.0475	1.1791	1.15879	0.947321	0.727419	0.574063	1	1.17865	1.11657	1.12306	1.18162	1.26362	1.23912	0.731357	0.781242	0.603077	1	1.11188	1.141	1.1474	0.997893	1.00791	1.09681	0.717965	0.791307	0.483165	1
CHERP	0.415603	0.39973	0.432951	0.988881	1.03947	1.26787	2.69426	2.98194	3.27006	1	0.40394	0.391602	0.406598	1.01546	1.02871	1.22703	3.8096	3.5102	3.32235	1	0.464817	0.486403	0.455326	1.1049	1.26783	1.22211	3.13978	2.43269	3.2657	1
CHFR	0.843803	1.11831	0.909402	0.709404	0.826619	0.81152	2.40109	1.99246	1.80188	1	0.963351	0.731744	0.818141	0.9948	0.988998	0.999488	2.43936	3.05817	0.744998	1	1.0956	1.13095	1.11963	1.20804	1.13967	1.19333	1.28629	1.54224	0.668348	1
CHID1	0.537088	0.606231	0.533024	1.73706	1.80708	1.68731	2.06747	1.66746	2.1309	1	0.404047	0.402341	0.431553	1.61878	1.61156	1.76753	2.03345	1.75299	1.89156	1	0.361358	0.410364	0.356048	1.57414	1.76358	1.93164	1.75606	1.73753	1.95286	1
CHKB	1.12342	1.2071	1.32401	0.817463	0.743549	0.771526	0.65514	0.54606	0.862068	1	1.54314	1.50389	1.87711	0.606879	0.697106	0.532653	0.827281	0.741354	0.792394	1	1.73757	1.72362	1.97577	0.75348	0.668703	0.528843	0.694628	0.713154	0.658842	1
CHM	1.58651	1.67685	1.76417	0.620753	0.750026	0.548452	0.473257	0.587589	0.60906	1	1.45304	1.54534	1.5809	0.749845	0.650485	0.504466	0.568229	0.59551	0.674009	1	1.52789	1.81783	1.60655	0.774663	0.827673	0.810632	0.682585	0.746738	0.657689	1
CHMP1A	1.41759	1.39709	1.39574	0.93487	0.888743	0.913708	0.783445	0.883701	1.06797	1	1.40153	1.53852	1.46157	0.905592	0.835516	0.747226	0.677563	0.774804	0.725088	1	1.4361	1.40597	1.45298	0.843732	0.817866	0.77465	0.938491	0.83133	0.671735	1
CHMP1B	1.20981	1.16303	1.21015	1.21135	1.23258	1.19758	1.04712	0.91383	1.12262	1	1.03865	0.982276	1.03479	1.27917	1.22166	1.33285	0.84595	0.889536	0.707924	1	1.13027	1.17385	1.10665	1.26209	1.22389	1.27364	1.09994	1.01797	0.838053	1
CHMP2A	1.3803	1.33038	1.27472	0.897081	0.881996	0.867482	0.755132	0.802892	1.01325	1	1.34933	1.53053	1.51467	1.12149	0.897268	0.812945	0.455895	0.595335	0.499262	1	1.43168	1.35501	1.37199	0.905951	1.08432	1.05146	0.620164	0.67356	0.537618	1
CHMP2B	1.44604	1.50763	1.42371	0.75422	0.640092	0.714309	0.823961	0.906496	1.00967	1	1.41502	1.85444	1.48002	0.967035	0.741836	0.734181	0.426367	0.522537	0.497444	1	1.25314	1.5548	1.2789	0.665555	0.81239	0.591525	0.499171	0.536713	0.559701	1
CHMP4A	1.61384	1.42569	1.65909	0.839582	0.799219	0.628323	0.652433	0.775286	0.813068	1	1.30445	1.11935	1.76766	1.00168	0.853804	1.0838	1.28385	0.718768	1.72644	1	1.59404	1.6186	1.69864	0.705854	0.623427	0.674251	0.395718	0.34826	0.20063	1
CHMP4B	1.58204	1.58514	1.52744	0.884133	0.870436	0.802585	0.410482	0.451016	0.402749	1	1.56423	1.61616	1.5265	0.850729	0.872848	0.857323	0.379584	0.442974	0.400326	1	1.41886	1.44524	1.51614	0.834962	0.737385	0.738331	0.406989	0.495992	0.37867	1
CHMP5	1.64786	1.64225	1.6572	0.827029	0.846018	0.735093	0.557053	0.511187	0.429812	1	1.54237	1.67805	1.43827	0.890863	0.899755	0.817212	0.494622	0.465628	0.685855	1	1.499	1.49052	1.5025	0.894466	0.833228	0.805349	0.555614	0.515896	0.44327	1
CHMP6	0.404776	0.412415	0.429236	1.96367	1.90206	1.8871	0.817698	0.879564	0.6491	1	0.492138	0.476694	0.481173	1.64029	1.5892	1.87097	0.590628	0.667949	0.693539	1	0.483912	0.552272	0.540882	2.13579	1.96633	2.32435	0.892734	0.909692	0.58669	1
CHMP7	1.68711	1.66325	1.74786	0.718756	0.658085	0.632565	0.418382	0.513031	0.474805	1	1.48534	1.4352	1.45944	0.651758	0.638009	0.596448	0.568258	0.582173	0.568861	1	1.5492	1.42109	1.48733	0.710404	0.719524	0.656379	0.611507	0.540179	0.719302	1
CHN2	1.24069	1.18703	1.12749	0.872387	0.867987	0.752244	0.835598	0.871238	0.841898	1	1.19106	1.24787	1.2565	1.07732	1.05126	0.904749	0.719236	0.516699	0.971246	1	1.42651	1.36834	1.47954	1.73055	1.56389	1.61619	0.537051	0.937319	0.762058	1
CHORDC1	1.73753	1.709	1.75395	0.658906	0.643629	0.502268	0.6656	0.568555	0.591537	1	1.76045	1.77189	1.74362	0.620163	0.709005	0.516054	0.472006	0.471623	0.40827	1	1.70046	1.70002	1.79407	0.680049	0.597601	0.522635	0.434408	0.541107	0.499677	1
CHP1	0.262362	0.244949	0.28279	2.03948	2.06912	2.14717	1.10241	1.25009	1.10824	1	0.210907	0.211741	0.215855	2.16053	2.1446	2.35935	1.31338	1.37765	0.99796	1	0.233373	0.275227	0.292712	1.73771	1.84253	2.09252	1.10903	1.08723	0.920005	1
CHPT1	0.398234	0.367758	0.356219	2.59133	2.38569	3.08523	0.926726	0.989254	0.846859	1	0.422146	0.268962	0.246483	1.17014	1.55099	1.37776	0.892087	1.15453	0.89177	1	0.415177	0.400655	0.458072	2.07064	2.51159	2.05253	0.992934	1.32831	0.518211	1
CHRAC1	1.45361	1.46208	1.27278	0.472886	0.481194	0.404961	1.34211	1.16354	1.96631	1	1.41417	1.17482	0.981557	0.434075	0.481202	0.294992	2.08878	1.30772	1.78419	1	1.747	1.87923	1.81844	0.622437	0.585377	0.42719	1.61816	1.28039	1.85731	1
CHTF8	0.94867	0.978261	0.973168	1.2297	1.21841	1.27692	0.700407	0.900705	0.811094	1	1.22158	1.14449	0.999621	1.20282	1.0159	1.04833	1.17942	1.65167	0.864435	1	1.13326	1.12357	1.13534	1.09033	1.23513	1.28827	0.95934	0.833702	0.972566	1
CHTOP	0.240249	0.22372	0.285393	0.819752	0.885621	0.971814	3.98912	3.36012	4.33626	1	0.435628	0.327976	0.355149	0.874879	0.665767	0.869475	4.89127	4.09251	3.62924	1	0.404767	0.421126	0.422928	0.85946	0.981379	1.03307	3.81028	2.9617	3.7084	1
CHUK	1.46087	1.52331	1.57178	0.635435	0.581777	0.461324	0.458878	0.430571	0.40002	1	1.56375	1.57402	1.61958	0.646841	0.654295	0.491388	0.544593	0.500518	0.534351	1	1.64461	1.62099	1.79499	0.743451	0.679135	0.587661	0.662152	0.691006	0.681256	1
CIAO1	1.47779	1.43514	1.50066	0.623221	0.641989	0.590978	0.918261	0.934726	0.875766	1	1.62832	1.63444	1.59382	0.797719	0.808539	0.656584	1.50661	1.16666	1.33695	1	1.37759	1.39889	1.40148	0.681133	0.658858	0.580684	0.711314	0.682365	1.01113	1
CIAPIN1	1.42094	1.41156	1.4314	0.799475	0.758033	0.770754	0.612105	0.541969	0.613853	1	1.68825	1.71088	1.85609	0.692486	0.704534	0.509511	0.561589	0.480084	0.559462	1	1.44283	1.35394	1.58555	0.660345	0.681591	0.612613	0.699932	0.712225	0.944733	1
CIB1	0.51008	0.50431	0.526921	1.70638	1.62757	1.86496	0.983806	1.05152	0.95755	1	0.521244	0.395599	0.461721	1.72985	1.819	2.07371	0.822615	0.879431	1.19977	1	0.420887	0.464888	0.446	1.71696	1.85151	2.06249	1.04993	1.11281	0.74998	1
CIC	0.528977	0.565717	0.633989	0.957218	1.0701	1.22504	2.07451	2.61824	2.23169	1	0.565859	0.513125	0.677106	1.05076	1.20542	1.38676	1.64072	2.69203	2.52456	1	0.534299	0.586462	0.620351	1.18484	1.46768	1.64718	2.42153	1.84778	1.37764	1
CINP	1.49341	1.52855	1.42796	0.792948	0.7963	0.697975	0.448681	0.50193	0.456675	1	1.33212	1.31279	1.39622	0.941149	0.825711	0.932248	0.520683	0.779901	0.896518	1	1.69158	1.65251	1.68766	0.731957	0.721725	0.621644	0.532406	0.680658	0.582184	1
CIR1	0.372937	0.386832	0.350694	0.901003	0.989824	0.991614	2.29281	2.61681	2.79677	1	0.38275	0.341992	0.379029	1.11953	1.02376	1.01013	3.47119	2.75733	2.56796	1	0.399894	0.442227	0.455143	1.43666	1.37973	1.57194	3.05272	2.77454	3.08836	1
CIRBP	0.596969	0.704919	0.629758	1.00463	1.13779	1.08836	1.7755	2.04395	2.61675	1	0.756888	0.683398	0.649868	1.08532	1.12021	1.22258	2.60903	2.67397	2.1034	1	0.744582	0.797263	0.737775	1.01373	1.06118	1.03379	2.17351	1.77429	1.9559	1
CISD1	0.60401	0.560099	0.571369	1.63626	1.61425	1.80143	1.0148	1.03426	0.846141	1	0.492725	0.483908	0.504439	2.25169	2.08486	2.47692	0.866652	0.94775	0.827336	1	0.479199	0.442718	0.432879	2.00791	2.06522	2.29306	1.06849	1.03595	0.788665	1
CISD2	0.375722	0.382859	0.408484	2.12364	1.89476	2.0999	1.00123	1.13409	0.816199	1	0.302387	0.325036	0.297757	2.54997	2.24105	2.61274	1.01582	1.16842	0.893014	1	0.351534	0.355443	0.338947	2.0658	2.13089	2.34535	1.141	1.16461	0.873464	1
CISD3	0.196218	0.172494	0.306523	1.31182	1.33356	1.30525	1.64547	1.79468	2.06132	1	0.455022	0.420942	0.463295	1.71302	1.67875	1.9521	2.84731	2.23416	2.4097	1	0.528073	0.410471	0.53594	1.9065	2.02979	1.9207	1.87961	1.55514	1.78272	1
CIZ1	0.245332	0.287178	0.294976	0.424977	0.396098	0.50194	2.63833	4.09024	4.73225	1	0.31252	0.309618	0.337409	0.63113	0.715695	0.707881	5.93358	5.20858	4.1989	1	0.554829	0.592259	0.465428	0.65896	0.745908	0.805959	4.90609	3.21188	5.19318	1
CKAP4	0.249697	0.254559	0.272617	1.9134	1.83844	2.17088	1.68003	1.83077	1.76627	1	0.201666	0.186721	0.214479	1.87912	1.76466	2.14701	1.53227	1.55773	1.85773	1	0.240497	0.205833	0.214688	1.72237	1.75587	1.95498	1.8904	1.65244	1.56643	1
CKAP5	0.889455	0.876882	0.88549	0.701562	0.692825	0.721284	2.5546	2.21942	2.99804	1	0.834401	0.900643	0.896296	0.767382	0.736237	0.763261	2.8132	2.66682	2.5368	1	0.89514	0.862029	0.865749	0.91141	0.996782	0.945917	2.28444	2.0596	3.11879	1
CKS1B	1.53964	1.48624	1.46791	0.639249	0.686572	0.560088	0.581257	0.600442	0.558434	1	1.21481	1.24633	1.34203	0.797838	0.987544	0.727121	0.735364	0.684012	0.493459	1	1.3483	1.29941	1.34268	0.851593	0.66714	0.704923	0.602127	0.653867	0.747363	1
CLASP1	1.121	1.06508	1.07605	0.721595	0.731795	0.739809	1.53952	1.50799	2.01565	1	1.09829	1.16872	1.17688	0.873095	0.892369	0.842135	1.60168	1.86221	1.8919	1	1.22562	1.11067	1.22718	1.01836	1.01093	0.939045	1.48029	1.27936	1.49117	1
CLASP2	1.42628	1.33931	1.41948	0.712077	0.739352	0.670912	0.839054	0.782931	0.990443	1	1.38031	1.40269	1.47465	0.820403	0.859004	0.775611	0.969537	0.924239	1.07956	1	1.45537	1.3575	1.38244	0.765655	0.879679	0.726705	0.986662	0.968644	1.02838	1
CLASRP	0.388026	0.39153	0.420419	1.27545	1.27123	1.40402	1.75676	1.6967	1.80041	1	0.410753	0.35383	0.409258	1.48588	1.32169	1.69104	1.96736	1.75985	1.40758	1	0.612074	0.599758	0.633518	1.19712	1.35771	1.25008	1.73674	1.41833	2.36774	1
CLC	1.3568	1.29347	1.63818	0.679922	0.656445	0.538025	0.599724	0.474181	0.61296	1	0.60921	0.612615	0.640841	0.442218	0.475231	0.385665	0.939024	0.458354	18.9122	1	0.450943	0.435577	0.618808	0.206391	0.176449	0.127886	0.158835	0.292858	0.220749	1
CLCC1	0.31413	0.323712	0.375187	2.05232	2.02519	2.18872	1.08408	1.08008	0.713941	1	0.262443	0.208437	0.301008	1.91114	1.83982	2.11336	0.862812	0.953296	0.657785	1	0.286413	0.290739	0.295197	1.93903	2.1747	2.27737	1.18327	1.19027	0.835355	1
CLCN7	0.471464	0.549575	0.459749	1.95515	1.81041	2.11544	0.964027	1.06937	0.947948	1	0.180892	0.162482	0.229959	2.1193	1.82236	2.1766	0.822935	1.05144	0.604644	1	0.314363	0.343824	0.291499	1.74417	2.06496	2.22567	0.977548	1.04607	0.725249	1
CLDND1	0.455947	0.384145	0.48063	1.87126	1.79151	2.36614	1.01638	1.12965	0.516115	1	0.870925	0.914594	0.85524	1.96668	1.91228	1.95821	0.595285	0.894808	0.677146	1	0.390718	0.491449	0.417802	1.99366	2.24815	2.36678	1.16124	1.00505	0.766228	1
CLEC16A	1.46223	1.25667	1.42291	0.856607	0.87463	0.877406	0.894455	1.04186	1.23397	1	1.51233	1.50065	1.44528	0.870624	0.915099	0.851874	0.611623	0.677179	0.66281	1	1.4509	1.40987	1.49874	0.789515	0.778843	0.770861	0.611044	0.504464	0.485791	1
CLEC2B	0.279702	0.286112	0.267442	1.7946	1.66274	1.86601	0.709135	0.802669	0.490208	1	0.559425	0.491533	0.594147	2.02462	1.96089	2.34073	1.04448	1.11398	0.88016	1	0.795007	0.71855	1.02435	1.89737	2.05185	2.08209	0.97719	0.914152	0.454303	1
CLEC2D	0.404755	0.372228	0.392624	1.76388	1.66657	1.75442	0.734391	0.828241	0.748237	1	0.295379	0.285115	0.259485	2.00498	1.83712	2.2043	1.26623	1.43174	1.02	1	0.323674	0.38988	0.366502	2.04851	2.45043	2.60424	1.1388	1.26212	1.02386	1
CLIC1	1.96868	1.98107	1.94661	0.649912	0.660239	0.475284	0.530131	0.480061	0.571157	1	2.13401	2.19068	2.08897	0.728468	0.797926	0.533486	0.47806	0.481219	0.681054	1	2.05353	2.07336	2.05853	0.57949	0.503766	0.389724	0.530567	0.555444	0.695392	1
CLIC3	0.993605	0.976635	1.03206	0.711424	0.619064	0.56774	0.522232	0.451431	0.395948	1	1.38079	1.39027	1.49062	0.813904	0.864797	0.770918	0.950522	1.01968	2.54416	1	1.9045	1.90548	2.02417	1.03518	0.94888	0.836697	0.849137	0.811611	0.910245	1
CLIC4	1.54083	1.54153	1.5124	0.596645	0.636974	0.511137	0.458787	0.519448	0.625751	1	1.48962	1.61374	1.54993	0.842171	0.923302	0.533334	0.753841	0.782217	2.91488	1	1.90705	1.80924	1.88795	0.684042	0.565204	0.406127	0.765536	0.84508	0.532001	1
CLINT1	0.748014	0.722796	0.729647	1.50305	1.51488	1.71269	0.748089	0.810369	0.67967	1	0.686105	0.680171	0.700513	1.80378	1.5722	1.97005	0.593335	0.719173	0.545221	1	0.825717	0.840188	0.825666	1.58294	1.60976	1.76222	0.714923	0.763623	0.546766	1
CLIP1	1.51226	1.50493	1.49631	0.690155	0.640655	0.58086	0.770513	0.831953	0.876452	1	1.61433	1.60887	1.66681	0.710065	0.734897	0.595547	0.860838	0.800875	1.36667	1	1.56956	1.50299	1.6136	0.687717	0.675846	0.590012	0.811287	0.802531	0.803399	1
CLIP2	1.26801	1.28797	1.27307	0.787302	0.84965	0.80704	0.813497	0.950966	1.03902	1	1.63639	1.42223	1.41313	0.906138	1.09933	1.03705	1.54651	1.56049	1.06634	1	1.45629	1.20769	1.34837	0.971218	1.02557	1.03493	1.10354	0.641828	0.861622	1
CLK1	0.30287	0.334944	0.320353	1.00465	1.0327	1.14405	2.84845	2.71399	3.00121	1	0.277958	0.306173	0.309426	0.934309	0.862438	0.968269	3.92808	3.63837	3.73258	1	0.28143	0.311314	0.313744	1.14888	1.2726	1.23429	3.59442	3.33314	4.31055	1
CLK2	0.743262	0.730206	0.701393	1.10713	0.930614	1.17042	2.01246	1.76981	2.39964	1	0.512914	0.442384	0.428846	1.43741	1.22772	1.60115	1.54608	1.35814	1.36775	1	0.603806	0.773829	0.662437	1.16055	1.39958	1.46569	1.47912	1.09569	1.08535	1
CLK3	0.457534	0.517968	0.503433	1.40939	1.35967	1.68759	1.48236	1.29549	1.5701	1	0.79928	0.802998	0.632378	1.45763	1.4102	1.49186	1.74842	1.50727	1.54436	1	0.637778	0.607184	0.537824	1.65439	1.72306	1.85195	1.45569	1.28331	1.53824	1
CLK4	0.342193	0.314839	0.359812	0.844401	0.935566	0.962823	3.20545	2.67305	2.99412	1	0.296678	0.19327	0.25907	0.824551	0.812961	0.967047	3.76164	3.57735	2.85992	1	0.504561	0.509477	0.366111	0.688525	0.988959	0.895878	3.35334	2.79598	4.30204	1
CLN5	1.06475	1.05403	1.03546	1.15822	1.11984	1.29169	0.400992	0.516762	0.320002	1	1.00844	1.03601	1.01105	1.17574	1.05839	1.29985	0.523533	0.585203	0.834661	1	1.13288	1.21005	1.24527	1.50572	1.35744	1.49932	0.675197	0.778146	1.03102	1
CLNS1A	1.28629	1.30545	1.46931	0.611048	0.640318	0.527415	0.641914	0.716056	0.745448	1	1.59729	1.43933	1.55311	0.698437	0.697742	0.541756	0.785069	0.81881	0.577721	1	1.42397	1.47895	1.56275	0.958587	0.857945	0.747882	0.70503	0.77102	0.893313	1
CLP1	0.598734	0.619043	0.568687	1.30695	1.25059	1.39935	2.10382	2.44523	2.47922	1	0.629767	0.589654	0.605768	1.14082	1.02687	1.29652	2.16355	1.845	2.10581	1	0.706225	0.729044	0.705189	0.907468	0.865482	0.902462	1.92943	1.93538	1.98561	1
CLPB	0.381382	0.382435	0.31971	2.3059	2.13392	2.18544	1.16479	1.33824	1.04581	1	0.370451	0.34644	0.339219	1.40156	1.20606	1.48607	0.804705	0.844577	0.543707	1	0.384114	0.391253	0.385074	2.22149	2.19284	2.49395	1.06833	1.15889	0.905157	1
CLPP	0.410881	0.42576	0.437991	1.80953	1.82346	1.81389	0.913064	1.03929	0.709314	1	0.435387	0.456221	0.45749	2.37372	2.02779	2.53389	0.803051	1.02304	0.829972	1	0.562647	0.556307	0.530311	1.89815	1.79766	2.0595	0.979947	0.976065	0.72435	1
CLPTM1	0.1821	0.16734	0.211818	2.12251	1.82857	2.33104	1.191	1.23197	0.940862	1	0.190535	0.150101	0.268084	2.56316	2.12789	2.66158	0.804667	0.942896	0.464714	1	0.152015	0.227075	0.270465	2.64833	2.43374	2.89858	1.08111	1.03307	0.606597	1
CLPTM1L	0.223491	0.255465	0.288628	1.78025	1.82428	2.27292	0.834986	0.919522	0.584725	1	0.281062	0.274336	0.284369	2.05907	2.01848	2.5092	0.573689	0.915474	0.450145	1	0.344596	0.360575	0.343863	2.14565	2.39867	2.58084	0.790853	0.9251	0.497854	1
CLPX	0.327515	0.336319	0.370426	1.86625	1.70147	1.9776	0.749174	0.909979	0.597861	1	0.323929	0.361392	0.321435	2.32066	1.98369	2.58971	0.623991	0.901745	0.498105	1	0.364827	0.310531	0.33639	2.28787	2.29336	2.70088	1.03157	1.05067	0.677102	1
CLSTN1	0.995551	0.962366	1.02589	1.3977	1.27993	1.32453	0.555814	0.707021	0.650294	1	1.54467	1.49166	2.00263	0.579428	0.622795	0.472153	0.14341	0.315184	0.694646	1	0.803112	0.869371	0.695208	1.85015	1.79465	1.77269	0.909615	0.965206	0.624109	1
CLSTN3	0.414613	0.435677	0.395842	2.36925	2.1953	2.15429	0.80115	0.755514	0.803413	1	0.704029	0.558854	0.579445	1.72432	1.64749	1.83929	1.86652	2.06151	2.25966	1	0.532751	0.578337	0.573162	2.17981	2.36347	2.2486	1.5741	1.19114	1.16631	1
CLTA	1.16167	1.13215	1.08456	1.23009	1.22594	1.21511	0.842538	0.890857	0.861436	1	0.964057	0.990487	0.977933	1.24102	1.3387	1.4349	0.90744	0.93174	0.721868	1	1.09439	1.13518	1.03419	1.18842	1.24137	1.36094	1.1389	1.07194	1.08098	1
CLTB	1.07328	1.094	1.04817	1.26838	1.31505	1.26135	0.793611	0.80484	0.778223	1	1.06029	1.10821	1.07189	1.2975	1.38328	1.39218	0.788711	0.789712	0.942463	1	1.11235	1.13653	1.13165	1.18304	1.17091	1.27432	0.759844	0.772761	0.675309	1
CLTC	1.1847	1.13808	1.18466	1.05589	1.04572	1.1126	0.693278	0.713069	0.640924	1	1.23836	1.21993	1.203	1.07165	1.07282	1.17324	0.616077	0.666165	0.607866	1	1.36381	1.39813	1.44298	1.11819	1.10901	1.07928	0.811022	0.815586	0.806204	1
CLU	0.966462	0.964555	0.816605	1.08035	1.18508	0.808298	4.27924	2.45834	2.51802	1	1.03204	1.03989	0.932769	1.14375	1.18973	0.916077	2.1652	1.86564	3.8705	1	0.927182	0.839477	0.855994	0.884534	0.868542	0.80965	2.59627	2.34225	3.60984	1
CLUH	1.36855	1.45952	1.39381	0.756635	0.736839	0.605362	0.513362	0.790209	0.982538	1	1.38578	1.41938	1.39242	0.75968	0.777456	0.733849	0.659103	0.702224	0.920128	1	1.58398	1.34946	1.38065	0.763177	0.7906	0.757484	0.634167	0.525674	0.644488	1
CLYBL	0.163716	0.182636	0.193767	1.27172	1.27076	1.19066	0.541688	0.496248	0.30074	1	0.345014	0.330391	0.366704	3.03884	2.8843	3.23535	0.810058	0.960552	0.586116	1	0.411378	0.416255	0.43005	2.3513	2.22254	2.64249	1.02647	1.0942	0.912101	1
CMAS	0.392142	0.377244	0.405206	0.585266	0.632164	0.571565	3.67006	4.31438	5.63331	1	0.33049	0.306142	0.326401	0.582321	0.668557	0.643942	5.70029	4.7146	5.76843	1	0.316306	0.354109	0.359459	0.650376	0.640372	0.652243	4.56238	3.62336	6.34341	1
CMC1	0.368676	0.436598	0.42004	2.15189	2.10827	2.15759	0.927722	1.01982	0.677393	1	0.272319	0.320246	0.36989	2.93611	2.39203	3.22954	0.931473	1.11249	0.641349	1	0.143459	0.144417	0.139576	2.28536	2.35677	2.51721	0.797831	0.887039	0.369935	1
CMC2	0.316747	0.297668	0.338916	2.05507	1.82636	1.92897	0.838291	0.84362	0.592141	1	0.461372	0.462051	0.424439	2.04393	1.51028	2.22548	0.469909	0.708329	0.269584	1	0.488232	0.496481	0.58608	2.05945	1.97353	2.33205	1.02398	0.9643	0.667889	1
CMC4	0.22476	0.23111	0.245747	2.59988	2.57543	2.36233	0.912534	0.881162	0.427849	1	0.191686	0.252974	0.215957	2.64496	2.3518	2.87519	0.730307	0.932584	0.425309	1	0.317591	0.480283	0.44204	1.84917	1.79909	2.28585	0.765801	0.914987	0.761697	1
CMPK1	1.64698	1.62485	1.79374	0.6176	0.616342	0.468001	0.435477	0.43912	0.385146	1	1.83414	1.89665	1.89045	0.586138	0.650682	0.473776	0.516219	0.519099	0.603603	1	1.77746	1.79002	1.78008	0.601622	0.509538	0.425693	0.498513	0.53187	0.528419	1
CMPK2	0.748725	0.707823	0.673005	1.23312	1.18317	1.30889	0.597253	0.756169	0.580831	1	0.939022	1.00506	1.00185	1.6108	1.56781	1.76606	0.711897	0.908328	0.639239	1	0.643004	0.658973	0.654551	1.36231	1.33754	1.25203	0.793639	0.832284	0.617736	1
CMSS1	0.558772	0.491623	0.491	0.804628	0.854033	0.903407	1.96603	1.87385	2.40623	1	0.709059	0.665685	0.72951	1.16396	1.24456	1.15643	2.78906	2.89952	2.84402	1	0.707226	0.658476	0.695193	1.14794	1.22167	1.183	3.20158	2.57372	3.79	1
CMTM3	0.1245	0.151306	0.14655	2.07349	1.91244	2.18475	0.961864	0.764564	0.28596	1	0.329457	0.277736	0.312942	2.31651	2.30455	2.50948	0.53817	0.790988	0.342972	1	0.4183	0.414591	0.530595	1.93522	2.26192	2.40355	0.977404	0.990056	0.514029	1
CMTR1	0.989976	0.956207	0.901673	1.12379	1.20725	1.32664	1.05412	0.971684	0.914069	1	0.946275	0.872808	0.909593	1.23529	1.21668	1.43419	1.38109	1.41123	1.26381	1	0.985524	1.04597	0.990389	1.28458	1.37016	1.42649	1.16334	1.1525	1.28749	1
CNBP	1.42124	1.47566	1.45912	0.773955	0.788416	0.660007	0.577717	0.664485	0.645528	1	1.5695	1.4327	1.5455	0.864933	0.866279	0.832466	0.565611	0.698649	0.582206	1	1.52828	1.56264	1.51264	0.814242	0.688082	0.689653	0.713996	0.635477	0.748692	1
CNDP2	1.64662	1.69256	1.6856	0.703978	0.714127	0.600065	0.524168	0.542495	0.492132	1	1.51976	1.55323	1.49155	0.635448	0.652248	0.5454	0.522453	0.448473	0.52155	1	1.77039	1.78496	1.76542	0.738879	0.65821	0.596627	0.544712	0.563304	0.656847	1
CNN2	1.50997	1.53593	1.53726	0.708958	0.664305	0.672257	0.587987	0.553213	0.589805	1	1.61482	1.73635	1.71006	0.780417	0.748191	0.6281	0.506874	0.606014	0.565384	1	1.90841	1.95121	1.90456	0.820282	0.892864	0.81034	0.559847	0.616771	0.503179	1
CNN3	1.1197	1.08038	1.14133	0.522016	0.504974	0.522084	0.230303	0.412777	0.388629	1	1.36989	1.44058	1.14713	0.423236	0.610919	0.373849	0.548303	0.528821	3.32095	1	1.65041	1.57284	1.81976	0.742403	0.660452	0.768265	1.59996	2.37692	1.2351	1
CNNM3	0.23895	0.263333	0.261393	1.7707	1.67676	1.93661	0.760119	0.804978	0.65233	1	0.221749	0.227343	0.243546	2.61665	2.31645	2.97624	0.783355	1.03218	0.534973	1	0.330537	0.31388	0.351149	2.07466	2.34454	2.50267	0.886546	0.87789	0.589681	1
CNOT1	1.22024	1.19525	1.15553	1.03021	1.04123	1.20152	0.799736	0.82379	0.761702	1	1.14042	1.2117	1.15222	1.10615	1.11522	1.18941	0.841284	0.993072	0.780976	1	1.25436	1.29031	1.24955	1.05512	1.04709	0.981629	0.76973	0.804744	0.756863	1
CNOT10	0.989516	0.894399	1.04022	1.10308	1.04647	1.24702	0.697996	0.789117	0.72566	1	0.917034	0.985821	0.958364	1.26789	1.23823	1.35209	0.77582	0.922647	0.674762	1	1.23249	1.22683	1.26751	1.3857	1.25694	1.37137	0.808548	0.826296	0.708108	1
CNOT11	1.21476	1.02961	1.14549	1.1501	1.18261	1.45985	0.605075	0.741745	0.676188	1	0.981932	0.994069	0.986302	1.2185	1.32288	1.41236	1.00495	0.968525	0.900166	1	1.14634	1.13177	1.2336	1.26766	1.36111	1.24667	0.847205	0.767661	0.807411	1
CNOT2	1.26701	1.20039	1.17978	1.19291	1.10543	1.21431	0.636555	0.925599	0.786054	1	0.94562	1.02313	1.13624	1.27179	1.12802	1.10867	0.925283	1.00956	0.789171	1	1.10398	1.22309	1.26702	1.1299	1.08202	0.987602	1.09406	1.13381	0.85376	1
CNOT3	1.19681	1.20107	1.34743	1.12592	1.05292	1.20849	0.682119	0.630753	0.618304	1	1.38832	1.23019	1.41225	1.27698	1.27798	1.37764	0.915567	0.926344	0.954279	1	1.22856	1.27759	1.30237	1.21319	1.16936	1.11273	0.782367	0.915388	0.809717	1
CNOT4	1.40617	1.30422	1.36039	0.84028	0.897918	0.927286	0.593578	0.668847	0.691093	1	1.04812	1.08336	1.26484	1.18109	1.00733	1.07206	0.565245	0.823797	0.942862	1	1.40566	1.34342	1.5024	0.97291	0.993425	0.804813	0.794212	0.731822	0.810323	1
CNOT6L	1.02521	1.06535	1.05733	1.17582	1.21238	1.34161	0.663981	0.795073	0.656754	1	1.217	1.16148	1.20216	1.02297	1.05527	0.972679	0.729493	0.813043	0.738519	1	1.48776	1.50166	1.49643	1.07079	1.00317	0.993255	0.790565	0.773033	0.838634	1
CNOT7	1.27456	1.22658	1.38143	0.841068	0.767115	1.0134	0.741213	0.669243	0.537512	1	1.41497	1.33089	1.42187	0.936466	1.02558	0.895358	0.591841	0.688585	1.12466	1	1.47703	1.50533	1.75528	0.965112	0.876272	0.813262	0.780711	0.688179	0.912492	1
CNOT9	1.4089	1.11627	1.27937	1.20474	1.28744	1.27528	1.15852	1.17748	1.22421	1	1.33884	1.16499	1.40924	1.1342	1.2903	1.24911	1.15131	0.972902	1.26372	1	1.10432	1.16104	1.06566	1.13787	1.15376	1.07485	1.26636	0.894216	1.14728	1
CNP	0.653031	0.641445	0.671835	1.79098	1.6311	1.75182	0.978516	0.971446	0.954899	1	0.503707	0.584628	0.560185	1.85088	1.66433	1.98713	0.746333	0.844139	0.621204	1	0.618595	0.622751	0.634498	1.72852	1.8861	1.96377	0.886182	0.963079	0.82951	1
CNPY2	0.740362	0.631198	0.645475	1.63788	2.04926	1.86531	1.26815	1.04146	1.4095	1	0.821016	0.766913	0.613499	2.25855	2.3516	2.61903	0.575144	1.16554	0.627019	1	0.44827	0.47247	0.57468	1.83886	1.88353	1.93548	1.09104	1.0269	1.13946	1
CNPY3	0.493795	0.517419	0.490476	1.94359	2.0048	1.84213	1.01261	0.866176	0.638169	1	0.472483	0.458167	0.50327	2.07516	1.81488	2.19329	0.612598	0.802152	0.513825	1	0.440945	0.405759	0.408554	2.2434	2.07893	2.29865	0.833905	0.88538	0.481793	1
CNPY4	0.567834	0.499378	0.548445	2.07768	2.07497	1.9412	1.02263	0.91213	0.828861	1	0.433137	0.43755	0.479848	2.11567	2.04768	2.35363	0.762419	0.887682	0.523018	1	0.44811	0.493554	0.45672	1.88624	1.81902	2.11468	0.722616	0.811904	0.577805	1
CNST	0.348739	0.375059	0.39854	2.22008	1.96799	2.25171	0.929753	0.942606	0.749452	1	0.384302	0.359636	0.391548	1.9565	1.66003	2.06067	0.618909	0.819737	0.471483	1	0.436352	0.371	0.413495	1.99293	1.96015	2.21379	0.967893	1.02617	0.696567	1
CNTRL	0.90567	0.932914	0.949516	0.87741	0.954901	0.840318	1.29556	1.32437	1.50201	1	1.05414	1.06113	1.00879	0.781656	0.864709	0.842726	0.727173	1.7201	0.709738	1	1.13587	1.05033	1.07357	0.822397	0.765937	0.723386	1.43883	1.98537	0.938296	1
CNTROB	0.950903	1.04738	1.17929	0.626219	0.643909	0.703422	2.03847	2.33315	2.67573	1	1.26791	1.00633	0.928698	1.06617	1.2851	1.10253	3.98264	3.96484	2.79904	1	0.923588	0.850061	0.843911	0.909417	1.53222	1.43402	2.9248	2.57857	2.62284	1
COA1	0.164943	0.176856	0.173885	1.94392	1.75629	2.2335	0.814056	0.825443	0.537276	1	0.130655	0.133101	0.165241	2.20656	1.96031	2.43952	0.835797	0.829441	0.533471	1	0.196912	0.222082	0.219094	2.18408	2.41272	2.72839	1.13542	1.04776	0.83103	1
COA3	0.428045	0.485591	0.524379	1.88816	1.42612	1.74588	1.44021	2.51914	1.82851	1	0.564752	0.57908	0.527338	1.6097	1.54076	2.50658	0.909764	1.16617	0.957626	1	0.301212	0.360441	0.335259	1.95268	2.00332	2.19797	1.00403	0.97386	0.570848	1
COA4	0.198366	0.202682	0.201098	2.55482	2.38114	2.27661	0.703818	0.766803	0.334916	1	0.220255	0.255167	0.261587	3.328	3.03705	3.28884	0.763776	0.990066	0.558446	1	0.234502	0.201015	0.223399	2.88785	2.5572	3.71596	0.653089	0.926461	0.370175	1
COA5	0.513516	0.512223	0.57211	1.52091	1.61243	1.38933	2.90987	2.09285	2.57207	1	0.368724	0.364171	0.339295	1.60164	1.67106	2.06093	2.27506	1.88211	2.31002	1	0.0981851	0.147784	0.162562	1.81257	1.89416	2.10114	1.92981	1.59831	1.85592	1
COA6	0.118758	0.136997	0.13519	2.62053	2.40012	2.34134	0.769696	0.781868	0.392667	1	0.399195	0.419078	0.401879	2.70007	2.47126	3.12706	0.436979	0.710567	0.271299	1	0.612725	0.734423	0.514546	2.10354	2.09506	2.28205	0.659935	0.657777	0.284887	1
COA7	0.368683	0.21207	0.246206	2.45736	2.30917	2.3675	1.2219	1.17216	0.775386	1	0.247226	0.23087	0.264046	2.56635	2.70335	3.05842	0.813805	1.22453	0.673451	1	0.315955	0.323201	0.289919	1.73077	1.89043	2.06263	0.761095	0.900504	0.457461	1
COASY	1.03558	1.0008	1.33888	1.05242	1.01888	1.08122	0.748914	0.509288	0.72088	1	1.26008	1.25033	1.24014	1.20749	1.09717	1.21037	0.511054	0.814689	0.733742	1	1.64699	1.7257	2.23835	1.16699	1.13635	1.20006	0.586451	0.739437	0.681049	1
COG1	1.03056	1.05201	1.10993	1.41892	1.30567	1.36172	0.825883	0.817049	0.592447	1	0.978275	1.01633	1.07661	1.29409	1.22025	1.22171	0.640827	0.699368	0.768377	1	0.816978	0.844196	0.953908	1.19324	1.19693	1.16432	0.867595	0.880866	0.624791	1
COG2	1.09601	1.06698	1.14694	1.41725	1.37561	1.44928	0.749409	0.758159	0.651372	1	1.17256	1.19625	1.31946	1.31055	1.28929	1.26829	0.564339	0.657347	0.81609	1	1.10019	1.07267	1.17333	1.35151	1.47629	1.32129	0.681244	0.68585	0.602698	1
COG3	1.11282	1.12289	1.15239	1.52242	1.40686	1.47577	0.682436	0.724842	0.582938	1	1.06424	1.12693	1.164	1.3622	1.20356	1.27424	0.503094	0.575443	0.480759	1	1.10128	1.06347	1.13761	1.43291	1.47965	1.39425	0.757638	0.749466	0.475641	1
COG4	1.04298	1.08986	1.11387	1.4458	1.37919	1.44188	0.636803	0.643106	0.608613	1	1.00206	1.03474	1.00621	1.36063	1.27493	1.33649	0.605032	0.724595	0.694834	1	0.955196	1.02552	1.02451	1.37792	1.44657	1.49729	0.73043	0.882781	0.726127	1
COG5	0.988436	1.03326	1.11287	1.25885	1.13578	1.20524	0.686755	0.810943	0.693851	1	1.13823	1.22383	1.30301	1.3391	1.24262	1.29734	0.487156	0.690525	0.692497	1	1.15316	1.30596	1.36772	1.43703	1.33139	1.29521	0.673738	0.710913	0.632985	1
COG6	1.21473	1.17045	1.29207	1.28846	1.26103	1.32983	1.02245	0.996649	1.11083	1	1.1702	1.27412	1.20135	1.05251	1.01654	1.04366	0.943337	0.656613	0.802308	1	1.19987	1.31172	1.12134	1.07037	1.2501	1.21988	0.850245	0.897125	1.09797	1
COG7	1.07829	1.05336	1.06987	1.31047	1.197	1.2405	0.909538	0.80999	0.807331	1	1.19833	1.21175	1.3422	1.22751	1.15611	1.15411	0.648671	0.643231	0.693828	1	1.21081	1.21737	1.36138	1.29115	1.35941	1.23844	0.726573	0.667375	0.656434	1
COG8	1.14224	1.12422	1.09293	1.50838	1.52371	1.4536	0.496629	0.713758	0.525173	1	0.963669	1.03979	1.00544	1.63684	1.62476	1.41862	0.877442	0.842653	1.07976	1	0.88928	0.941874	1.00045	1.56855	1.64943	1.4779	0.569918	0.756906	0.766173	1
COIL	0.262487	0.256654	0.280413	0.818022	0.91508	1.04529	3.1125	3.34468	4.19726	1	0.347387	0.36184	0.365167	0.96533	0.901161	1.16276	3.90789	2.97514	3.46126	1	0.30539	0.325361	0.355493	1.1097	1.47685	1.45212	2.96477	3.08267	4.47371	1
COL4A3BP	1.43559	1.37817	1.41495	0.832511	0.691574	0.784774	0.440387	0.513194	0.448875	1	1.62613	1.47406	1.68248	0.606407	0.662557	0.566256	0.495524	0.508233	0.531342	1	1.45004	1.50947	1.46776	0.924041	0.713398	0.790372	0.604569	0.593858	0.618278	1
COLGALT1	0.481324	0.469103	0.515363	2.15203	2.0281	2.16759	1.24884	1.14059	0.926264	1	0.441056	0.449298	0.45187	2.15398	2.10949	2.36771	0.937273	0.954757	0.782496	1	0.523871	0.515837	0.49624	1.47228	1.55888	1.5745	0.889266	0.825364	1.03644	1
COMMD1	1.77633	1.70685	1.78898	0.871479	0.855938	0.775059	0.42174	0.522712	0.431988	1	1.34771	1.29832	1.35498	1.04374	0.946998	0.883632	0.379738	0.421327	1.03761	1	1.66247	1.48229	1.5826	1.09551	0.911152	0.878577	0.465728	0.538794	0.287185	1
COMMD10	1.67189	1.78554	1.63219	0.741256	0.734794	0.702654	0.642338	0.362955	0.31732	1	1.54906	1.55245	1.55017	0.972516	0.979958	0.924453	1.12704	0.602678	1.40682	1	1.60546	1.59381	1.67866	0.757005	0.664204	0.668976	0.534105	0.446354	0.294365	1
COMMD2	1.24447	1.18336	1.38591	0.934626	0.779415	0.818104	0.732635	0.728934	0.955379	1	1.56709	1.70918	1.62599	0.860218	0.842703	0.695174	0.599231	0.679008	0.559047	1	1.52712	1.48847	1.56734	0.796981	0.827459	0.76405	0.731598	0.973894	0.839986	1
COMMD4	1.42534	1.61518	1.37521	0.614508	0.603382	0.576352	0.682778	0.669923	0.753497	1	1.77513	1.82744	1.63139	0.758288	0.737933	0.635712	0.68603	0.623196	0.721453	1	1.76567	1.74645	1.75698	0.786509	0.725716	0.648995	0.743591	0.754833	1.02829	1
COMMD5	1.46741	2.4446	1.43924	0.971167	1.02223	0.928191	0.438554	0.585027	0.257107	1	1.6173	1.73188	1.76588	0.926418	0.924737	0.77328	1.61974	1.26838	1.45131	1	0.751266	0.744995	0.721779	0.709981	0.627321	0.785784	0.612686	0.709818	0.649413	1
COMMD6	1.64335	1.73499	1.5873	0.74492	0.631162	0.752442	0.338451	0.368945	0.392102	1	1.69447	1.51215	1.74238	0.773922	0.749245	0.777185	0.504351	0.659305	0.59613	1	1.46712	1.51015	1.5431	0.708706	0.804231	0.692708	0.650763	0.672286	0.683701	1
COMMD7	1.44776	1.79993	1.43737	1.01561	0.906734	0.97194	0.520423	0.659844	0.407535	1	1.63855	1.6297	1.64094	0.775843	0.729282	0.739704	0.658815	0.736629	0.514984	1	1.63107	1.53479	1.70517	0.81271	0.740357	0.704266	0.74079	0.765116	0.916757	1
COMMD8	1.82307	1.67214	1.86732	0.804821	0.974064	0.664646	0.285035	0.458258	0.427515	1	1.57958	1.75842	1.51338	1.01219	1.07319	0.880911	0.543045	0.46875	0.459132	1	1.6644	1.62009	1.71716	0.916073	0.859266	0.838219	0.58528	0.533009	0.495622	1
COMMD9	1.93101	1.92822	1.84153	0.70702	0.696188	0.67122	0.224865	0.407129	0.396535	1	1.76882	1.8912	1.7165	0.705415	0.738409	0.641435	0.228725	0.404092	0.294626	1	1.59986	1.83993	1.80647	0.700392	0.722498	0.564123	0.479028	0.545155	0.335265	1
COMT	0.462315	0.353654	0.526709	1.94407	1.73938	2.12042	0.827358	0.871703	0.468957	1	0.531659	0.508371	0.549138	2.04817	1.80256	2.21875	0.645467	0.949223	0.640186	1	0.534013	0.576245	0.638854	2.1258	2.08238	2.22012	1.03912	1.23488	0.617864	1
COMTD1	0.318306	0.331627	0.367233	2.05796	2.08696	2.35836	1.36826	1.32624	0.878264	1	0.295264	0.279115	0.336387	1.74842	1.69447	2.08709	0.77797	0.956819	0.652001	1	0.443333	0.374294	0.420033	2.50818	2.6037	3.04739	1.17519	1.22312	0.754717	1
COPA	1.29251	1.30582	1.30597	1.06896	1.06593	1.10044	0.784606	0.800539	0.735822	1	1.38812	1.41441	1.3978	1.07284	1.04851	1.03917	0.638561	0.708517	0.659291	1	1.28943	1.32294	1.32236	1.02832	1.0165	0.96969	0.699489	0.754156	0.695157	1
COPB1	1.42455	1.36741	1.46876	1.08825	1.09711	1.12783	0.735775	0.78643	0.735927	1	1.66444	1.63469	1.60974	1.03857	1.02077	0.968591	0.513134	0.590931	0.535581	1	1.42336	1.44045	1.46164	0.944847	0.886607	0.833942	0.583326	0.604856	0.560793	1
COPB2	1.26588	1.2513	1.27467	1.09296	1.09006	1.11775	0.698594	0.756113	0.702132	1	1.32968	1.35677	1.33294	1.16319	1.10154	1.10495	0.514967	0.600366	0.570119	1	1.38124	1.43035	1.46094	1.06233	1.01345	0.962763	0.673001	0.633776	0.648576	1
COPE	1.13008	1.16941	1.19725	1.02963	1.08992	1.09708	0.875676	0.729724	0.642601	1	1.25963	1.26334	1.36355	1.14161	1.08987	1.05461	0.542533	0.600926	0.53532	1	1.3421	1.43157	1.36317	1.09013	1.00578	1.01642	0.739285	0.696107	0.580074	1
COPG1	1.38721	1.34045	1.37928	1.0421	1.05618	1.03031	0.680591	0.661807	0.541859	1	1.4921	1.51573	1.46341	1.0406	1.04745	1.05721	0.538779	0.555077	0.538819	1	1.32107	1.35192	1.32563	0.985815	0.986078	0.900864	0.642259	0.635885	0.546266	1
COPG2	1.10823	1.14869	1.09039	1.10277	1.08699	1.15557	0.829945	0.80402	0.714959	1	1.22314	1.21841	1.28243	1.17394	1.18537	1.27857	0.690227	0.812841	0.702719	1	1.19398	1.19235	1.2567	1.12379	1.09945	1.06628	0.887618	1.03523	0.670307	1
COPS2	1.2759	1.28371	1.27617	1.0226	0.99965	1.06952	0.960503	0.939659	0.990927	1	1.46731	1.42621	1.4902	0.955355	0.961422	0.95521	0.521479	0.587445	0.552305	1	1.37249	1.42506	1.42075	1.02493	1.0252	1.00885	0.860314	0.728335	0.737607	1
COPS3	1.41318	1.38786	1.3666	1.0055	0.931122	0.976203	0.649616	0.625646	0.577661	1	1.46204	1.34988	1.33627	0.97141	0.978592	0.961053	0.626873	0.676123	0.561869	1	1.20365	1.25461	1.29966	1.08318	1.06771	1.08951	0.707001	0.675198	0.618692	1
COPS4	1.29685	1.26997	1.33017	0.888131	0.845141	0.834745	0.591399	0.677706	0.670381	1	1.27651	1.30721	1.36892	0.900431	0.918487	0.944016	0.558074	0.550559	0.521931	1	1.51284	1.46726	1.65434	1.11445	1.03816	0.96027	0.757122	0.676819	0.625645	1
COPS5	1.40125	1.39481	1.38107	1.00694	0.999428	0.948008	0.74192	0.698098	0.938717	1	1.38342	1.43458	1.37938	0.915211	0.960809	0.889043	0.505626	0.612932	0.469789	1	1.45411	1.52225	1.56941	0.949655	1.05198	0.988242	0.646151	0.747589	0.760153	1
COPS6	1.22019	1.17778	1.23729	0.893189	0.852947	0.877442	0.665542	0.746043	0.794312	1	1.1979	1.25216	1.28052	0.979103	1.01937	0.891631	0.681999	0.710674	0.64657	1	1.38371	1.40991	1.52881	1.1089	1.12178	1.11826	0.845836	0.973042	0.722703	1
COPS7A	1.22177	1.27688	1.28323	0.892012	0.944567	0.957443	0.815945	0.858067	0.788436	1	1.2735	1.22343	1.43747	1.02435	1.05724	0.988809	0.531942	0.76889	0.771434	1	1.30245	1.23287	1.36633	0.905736	0.967616	0.916936	0.675674	0.929478	0.763219	1
COPS7B	1.37232	1.35924	1.33579	1.04215	1.12222	0.99671	0.775504	0.721137	0.625002	1	1.52269	1.41622	1.69618	1.11061	1.18599	1.00418	0.560035	0.665976	0.681032	1	1.26047	1.31158	1.37956	1.15945	1.0578	1.08443	0.659441	0.680312	0.638924	1
COPS8	1.4284	1.5816	1.3516	1.0187	0.990874	0.950429	0.529011	0.518586	0.390564	1	1.59652	1.70787	1.53049	0.987691	1.11481	1.01195	0.664299	0.723175	0.637378	1	1.43872	1.60594	1.64653	1.17259	1.04092	1.03391	0.593562	0.720462	0.685178	1
COPZ1	1.41277	1.45902	1.40537	1.0275	0.941261	1.04753	0.532946	0.445134	0.368468	1	1.59226	1.64736	1.66683	1.22208	1.09562	1.17	0.596575	0.695908	0.504881	1	1.31442	1.36261	1.46785	1.03316	0.999989	0.923796	0.685602	0.599598	0.557292	1
COQ10B	0.347951	0.443872	0.357626	2.12258	2.08424	2.40853	1.42151	1.40645	1.0966	1	0.369238	0.45562	0.351369	2.31204	1.89464	2.52633	0.901581	1.02673	0.895059	1	0.304046	0.459153	0.480622	2.00507	1.95268	2.10922	2.15952	1.73426	1.96963	1
COQ3	0.163372	0.198122	0.208244	2.0727	2.00897	2.17696	0.846611	0.777119	0.629029	1	0.157389	0.177617	0.219993	2.16624	1.95067	2.53716	0.656797	0.763291	0.480849	1	0.226649	0.230635	0.267005	2.46688	2.50885	2.86364	0.904558	1.02794	0.675801	1
COQ5	0.213452	0.295295	0.240443	1.69408	1.58652	2.00065	0.946611	1.04587	0.935906	1	0.312273	0.255012	0.264254	1.87792	1.61639	2.02247	0.49418	0.673404	0.454741	1	0.35033	0.392186	0.445753	2.07225	1.90453	2.10606	0.962642	1.13656	0.852811	1
COQ6	0.753823	0.685299	0.769821	1.43972	1.38533	1.60901	0.927479	0.998903	0.882576	1	0.661738	0.568697	0.452269	1.39129	1.29628	1.51049	0.666181	0.938769	0.958533	1	0.442409	0.483359	0.436688	1.90481	1.92499	2.21194	1.06307	1.14525	0.581621	1
COQ7	0.167001	0.202656	0.205873	1.73243	1.53219	1.84338	0.667013	0.86988	0.640039	1	0.138688	0.182251	0.158745	2.05794	1.79943	2.26091	0.469807	0.679585	0.377344	1	0.256835	0.307345	0.290114	2.23222	2.24412	2.66115	0.797566	1.13567	0.492188	1
COQ9	0.272146	0.28827	0.291108	1.73516	1.61134	1.84902	1.0033	1.02141	0.915616	1	0.253534	0.259436	0.237187	1.81034	1.65296	1.94497	0.695866	0.805532	0.544094	1	0.302811	0.329981	0.301887	2.2869	2.18029	2.6807	0.966958	1.05796	0.562088	1
CORO1A	1.56503	1.52148	1.52781	0.746238	0.740521	0.638779	0.609123	0.717959	0.821518	1	1.56175	1.62403	1.50718	0.666736	0.708756	0.616759	0.797444	0.815483	0.60393	1	1.75567	1.80365	1.76692	0.655965	0.586828	0.532266	0.477498	0.525902	0.527728	1
CORO1B	1.10511	1.09781	1.07281	0.811833	0.798616	0.788847	1.33771	1.37886	1.9052	1	1.28435	1.24463	1.29181	0.964913	1.03753	0.957823	1.1035	1.11073	1.60111	1	1.08216	0.995068	1.20398	0.858905	0.790973	0.726442	1.23319	1.43226	1.37119	1
CORO1C	0.316201	0.349992	0.362016	0.775172	0.758423	0.639761	1.90556	2.54165	2.90677	1	0.651167	0.610875	0.688415	0.981763	0.865336	0.962339	4.29576	3.79283	3.49096	1	0.686263	0.67759	0.621584	1.23485	1.39466	1.19282	3.33924	2.43783	4.04757	1
CORO2A	0.637251	0.614328	0.644251	1.16254	1.22967	1.06197	3.60616	4.06786	6.04156	1	0.461443	0.546935	0.487429	0.885069	1.02254	1.02159	3.66296	3.29242	3.42494	1	0.369894	0.394557	0.377923	0.910774	1.15295	0.964804	2.38918	2.13914	3.52132	1
CORO7	1.02051	1.0642	1.03922	0.773942	0.891141	0.816072	0.786844	0.748916	0.962281	1	1.17258	1.63752	1.52977	0.877295	0.766972	1.07063	0.687761	0.858593	0.21838	1	1.49055	1.63321	1.38706	0.700023	0.630541	0.679682	0.404875	0.578702	0.541425	1
COTL1	1.88376	1.89689	1.84652	0.624723	0.583587	0.455996	0.412826	0.495467	0.471982	1	1.82646	1.91377	1.8109	0.588147	0.590456	0.456078	0.412254	0.362976	0.471446	1	1.69971	1.77704	1.7317	0.528186	0.436217	0.342285	0.405343	0.416264	0.39562	1
COX11	0.275705	0.24469	0.291191	2.19103	1.89272	2.15559	0.595994	0.837994	0.22131	1	0.232111	0.268645	0.269814	2.27835	1.42697	2.43123	0.482003	0.83063	0.328578	1	0.448195	0.346153	0.355509	2.23958	1.8133	2.03264	0.917815	0.954187	0.511154	1
COX15	0.595275	0.65117	0.528587	1.54391	1.51987	1.77711	1.08881	1.13366	0.71114	1	0.508218	0.590291	0.512312	1.75343	1.61622	2.11731	0.973579	0.920482	0.510876	1	0.469877	0.456953	0.384879	1.85331	1.96937	2.41878	1.32674	1.16788	1.05122	1
COX17	0.276597	0.291599	0.266374	3.0039	2.60534	2.51629	1.05743	0.928091	0.640489	1	0.259464	0.270313	0.246811	2.28457	1.96766	2.51121	0.607179	0.852867	0.692078	1	0.169031	0.267902	0.253695	2.59905	1.60232	3.37783	0.580244	1.07058	0.391498	1
COX19	0.334776	0.30995	0.337872	2.38764	2.04758	2.39803	0.92462	0.842466	0.568359	1	0.247794	0.268944	0.287957	2.63307	2.2906	2.79967	0.627557	0.785166	0.394596	1	0.399761	0.46191	0.328503	2.1009	2.10776	2.38337	0.770263	0.890515	0.578195	1
COX20	0.614607	0.693333	0.679128	1.78865	1.59106	1.87124	1.07004	0.994932	0.620857	1	0.127757	0.201235	0.188078	2.3876	2.18839	2.93678	1.12599	1.0313	0.59248	1	0.418435	0.32272	0.281894	1.84438	2.45973	2.86567	0.936243	0.989167	0.411996	1
COX4I1	0.361964	0.362968	0.373074	1.84434	1.77271	1.97146	0.989258	1.0537	0.79635	1	0.273424	0.267962	0.291441	2.14421	1.8689	2.30746	0.859443	0.959485	0.678486	1	0.397573	0.394492	0.410595	1.98642	2.09076	2.32022	1.07976	1.04726	0.740242	1
COX5A	0.384411	0.35908	0.354971	2.3206	2.1711	2.42147	0.87035	0.917705	0.522973	1	0.236187	0.23613	0.228485	2.50054	2.32841	2.71733	0.686435	0.778696	0.509173	1	0.268147	0.294471	0.287818	2.21731	2.254	2.74826	1.03221	0.977266	0.622505	1
COX5B	0.388784	0.391062	0.376176	2.24747	2.21485	2.31415	0.99067	0.959309	0.636706	1	0.455054	0.417792	0.425675	2.31964	2.05099	2.4782	0.743799	0.829025	0.753895	1	0.314684	0.321292	0.336845	2.09213	2.23408	2.51926	0.902546	0.914247	0.483795	1
COX6B1	0.384662	0.394956	0.396352	2.33516	2.14801	2.28587	1.05039	0.983667	0.732603	1	0.331481	0.358714	0.347959	2.16522	2.01032	2.41917	0.969299	0.970535	0.741831	1	0.409499	0.412026	0.404533	1.90894	2.07701	2.11243	1.02155	1.04149	0.738048	1
COX6C	0.39043	0.392976	0.391077	1.92358	1.83023	2.04685	0.842995	0.891048	0.566986	1	0.331736	0.302528	0.324345	2.23015	1.81632	2.45062	0.799841	0.828859	0.641972	1	0.439967	0.407412	0.388803	2.11739	2.13153	2.40566	0.956287	1.04157	0.771331	1
COX7A2	0.318296	0.324172	0.361901	2.25967	2.09966	2.55215	1.20591	1.04024	0.881454	1	0.287974	0.335558	0.292663	2.43009	2.15121	2.75796	1.72592	1.75785	2.0452	1	0.231604	0.217014	0.26673	2.08989	2.03773	2.50336	0.931164	0.996188	0.510787	1
COX7A2L	0.286353	0.280239	0.339961	2.02454	1.85123	2.37448	0.866805	0.899639	0.818688	1	0.433562	0.36942	0.447998	2.17299	1.88579	2.33689	0.54595	0.709994	0.539261	1	0.459954	0.418298	0.531049	2.16086	2.3317	2.19482	0.871468	1.02209	0.659815	1
COX7B	0.17146	0.162388	0.220921	2.27761	2.04587	3.46894	0.845589	1.11974	0.361149	1	0.197456	0.186604	0.205598	2.37381	2.19369	2.63812	0.607123	0.822745	0.359374	1	0.195491	0.160337	0.256612	1.96763	2.00814	1.92225	0.929183	0.837598	0.498996	1
COX7C	0.437254	0.473316	0.587847	2.0015	2.0028	2.23598	1.17327	1.16505	1.01586	1	0.275038	0.224932	0.241153	2.96932	2.29768	2.81333	0.630858	0.776796	0.899636	1	0.3098	0.33923	0.315111	1.78121	2.52722	2.60994	0.925933	0.911735	0.500708	1
CP	0.876677	0.993503	0.955765	1.1962	1.12519	0.947319	3.72209	2.3014	2.71671	1	1.13287	1.376	1.09741	1.04363	1.2939	0.89803	2.17249	1.90455	2.41631	1	1.46483	1.25143	1.0377	1.11072	1.07987	0.945744	2.36875	2.36215	3.13259	1
CPD	0.431073	0.424914	0.424863	1.28015	1.42828	1.54192	1.28172	1.39386	1.68322	1	0.645814	0.816418	0.896702	1.16789	1.08111	1.22442	1.27538	1.25521	3.85839	1	1.13928	1.17748	1.13977	1.17049	0.787701	0.953582	0.862278	1.24668	1.51712	1
CPN1	0.854471	1.11869	0.872288	1.51303	1.46922	1.16013	5.84772	2.56742	2.99568	1	1.11529	1.16003	1.17877	1.05556	1.12099	0.891744	1.66093	1.81895	2.39949	1	1.43806	0.935237	0.927644	1.04642	1.28889	1.25027	2.21648	2.21845	2.71664	1
CPNE1	1.16911	1.19278	1.1859	0.447163	0.477531	0.369742	0.353402	0.363094	0.327106	1	1.9168	1.92094	1.95128	0.746619	0.815347	0.616226	0.677577	0.623005	0.843602	1	2.09212	2.05054	2.19848	0.70355	0.589204	0.472286	0.572428	0.603051	0.699084	1
CPNE3	1.54617	1.57944	1.53492	0.818507	0.812018	0.710383	0.721356	0.565927	0.57989	1	1.67705	1.72278	1.67427	0.673388	0.728629	0.566022	0.514402	0.45132	0.487789	1	1.62152	1.632	1.66588	0.622951	0.618586	0.532393	0.576945	0.581887	0.545043	1
CPOX	0.260507	0.3098	0.336286	2.34105	2.13946	2.14298	0.937438	0.877715	0.595034	1	0.265103	0.322041	0.314932	3.22347	2.71149	3.19912	0.681991	1.01245	0.532907	1	0.305728	0.307797	0.305818	2.16666	2.06328	2.36002	0.719684	0.883063	0.536617	1
CPPED1	1.65664	1.78891	1.75827	0.631708	0.626964	0.46823	0.39308	0.454027	0.387546	1	1.70766	1.81094	1.85194	0.605862	0.655701	0.472921	0.583722	0.605968	0.471833	1	1.75534	1.82637	1.75393	0.617769	0.563797	0.5008	0.420984	0.493405	0.49123	1
CPQ	1.32463	1.34241	1.33855	1.00386	1.0106	0.983962	0.798059	1.17938	1.04704	1	0.998124	1.12487	0.940224	0.831609	0.928358	1.11028	1.28554	1.69007	2.54974	1	0.828475	1.1092	1.07898	1.27146	0.941812	1.29898	0.89155	0.86311	1.25074	1
CPSF1	0.332919	0.351077	0.368267	0.910205	0.974615	1.12492	2.24439	2.7284	3.12412	1	0.329654	0.332356	0.35023	0.806488	0.80511	0.892283	3.82609	3.49712	3.9957	1	0.42365	0.420369	0.424717	0.854435	1.06074	0.945655	3.82951	3.16207	4.82531	1
CPSF2	0.347108	0.359192	0.393548	0.967102	1.02893	1.22223	2.45291	3.0642	3.60922	1	0.372348	0.427668	0.45106	0.843285	0.858567	0.9955	3.74566	3.28143	3.12376	1	0.449286	0.474214	0.507196	0.902606	1.05861	1.02297	3.36041	2.87159	4.80134	1
CPSF3	0.45712	0.438591	0.463346	0.922826	0.955066	1.12254	2.6948	2.31626	2.99233	1	0.446729	0.407159	0.443319	0.971908	0.92735	1.03034	3.45289	3.06288	3.2632	1	0.550395	0.501263	0.486519	1.00579	1.17354	1.13334	2.93622	2.59829	4.02278	1
CPSF3L	0.457584	0.448001	0.448562	0.876222	0.787522	0.971028	2.67571	3.27475	3.89039	1	0.619771	0.586454	0.602973	0.755859	0.82569	0.883082	3.94667	2.90085	3.78555	1	0.459483	0.723736	0.599323	0.810851	0.965286	0.857328	2.49475	2.19006	3.14607	1
CPSF4	0.255826	0.253738	0.282881	0.967484	1.05429	1.2457	2.88564	3.28143	2.98222	1	0.436881	0.420126	0.432985	0.880959	0.816357	1.03163	4.36522	4.0425	3.96104	1	0.406477	0.336842	0.386108	0.883817	1.1407	0.985257	3.43677	2.20419	3.70262	1
CPSF6	0.559556	0.528705	0.537758	1.70847	1.65576	1.76643	1.22277	1.46048	1.28124	1	0.497023	0.470668	0.485887	1.70304	1.62555	1.74967	1.40845	1.35564	1.10181	1	0.521559	0.585549	0.583446	1.74446	1.71052	1.86326	1.27916	1.21211	1.20948	1
CPSF7	0.400688	0.387672	0.368992	1.46034	1.49325	1.7222	1.71029	2.14924	2.29343	1	0.387346	0.340151	0.349767	1.40085	1.36541	1.51419	2.84227	2.53727	2.66961	1	0.342668	0.347366	0.368268	1.47318	1.50828	1.5118	2.24693	1.94151	2.8097	1
CPT1A	0.445882	0.486387	0.474567	2.1911	2.00719	2.33883	1.0771	1.09032	0.833116	1	0.394135	0.393682	0.365846	2.09102	1.81795	2.20288	0.901318	1.02575	0.69647	1	0.467278	0.480077	0.434108	2.08503	2.15774	2.39271	1.12508	1.12098	0.924207	1
CPT2	0.230043	0.221058	0.266125	1.97085	1.87965	2.062	0.769104	0.831573	0.488991	1	0.163001	0.204157	0.20687	2.36475	2.05138	2.52901	0.573868	0.81497	0.449966	1	0.311476	0.32121	0.276041	2.65016	2.72034	2.87326	0.981212	1.04631	0.515958	1
CPTP	1.19484	1.14731	1.39352	0.626512	0.721942	0.551844	1.0707	1.49827	1.98088	1	1.17154	0.982882	1.38488	0.892077	1.00203	0.667486	2.28707	2.16615	2.29898	1	1.13841	0.925757	1.31339	1.05366	1.04478	0.950474	1.93928	1.44314	2.09849	1
CPVL	0.497745	0.473046	0.488564	0.742943	0.736413	0.901663	0.733059	0.807644	0.803343	1	1.39229	1.52475	1.46316	1.75403	1.8661	2.03337	1.52974	1.5299	1.32311	1	0.794838	0.776864	0.845695	1.45775	1.29834	1.67403	0.902235	1.19085	1.31799	1
CRACR2A	0.830344	0.776654	0.817855	1.27988	1.32171	1.3551	1.15562	1.05192	1.28822	1	0.891353	0.925166	0.980781	1.49308	1.25862	1.69128	0.789129	0.914924	0.875468	1	0.965549	1.05826	1.05076	1.37075	1.4532	1.41693	0.935347	0.819082	0.8985	1
CRADD	0.92285	1.11363	1.18488	1.06143	1.26245	1.10417	1.31846	1.34452	0.961476	1	0.855105	0.88785	1.25394	0.931307	1.30497	0.953339	1.93552	1.5043	1.55817	1	1.5314	1.22399	1.8734	0.700693	0.797747	0.705907	1.14973	0.810769	0.506785	1
CRAT	0.371659	0.352785	0.412743	2.00347	1.89788	1.88321	1.13727	1.10605	1.00562	1	0.358832	0.33872	0.361017	2.54492	2.13189	2.61184	0.936221	1.21072	0.776265	1	0.425238	0.426383	0.44567	1.85174	1.86099	2.02156	0.981022	1.08444	0.728008	1
CRB3	0.510333	0.483989	0.756365	1.84046	1.88635	1.44083	0.569023	1.60641	0.977819	1	0.21475	0.188968	0.203601	1.65661	1.53032	2.15255	0.693233	0.662324	0.676607	1	0.386284	0.590177	0.555283	1.34154	1.18187	1.32677	0.721298	0.993831	0.848058	1
CRBN	1.50244	1.51443	1.49053	0.754288	0.717655	0.650241	0.550319	0.533499	0.459076	1	1.67299	1.7387	1.6169	0.72323	0.783578	0.59401	0.356088	0.539852	0.372089	1	1.5316	1.54567	1.55209	0.760807	0.715728	0.663377	0.461831	0.626679	0.521817	1
CREB1	0.363346	0.246937	0.310506	0.69706	0.903868	1.19389	3.24625	4.32181	5.20348	1	0.315784	0.314204	0.282563	0.7905	0.798292	0.960656	4.49432	4.10039	4.19358	1	0.439069	0.465532	0.383131	0.898006	0.977804	1.04792	3.14987	2.77317	3.12813	1
CREBBP	0.48304	0.430784	0.447571	1.37492	1.29835	1.52818	1.2788	1.54603	1.71273	1	0.492826	0.448363	0.469256	1.58116	1.48319	1.75057	1.88541	1.55138	1.39193	1	0.54144	0.546129	0.500919	1.56642	1.64219	1.67503	1.31556	1.32324	1.29802	1
CREBRF	0.602968	0.544316	0.520387	0.776796	0.808562	0.866385	1.86675	2.53863	3.42949	1	0.409904	0.455994	0.480853	0.744984	0.794664	0.885676	4.37803	3.78117	3.62164	1	0.400792	0.445864	0.42777	1.03286	1.1423	1.21849	3.72755	3.02021	4.21394	1
CRELD1	0.227652	0.234745	0.25909	2.24284	2.12783	2.46948	0.830879	0.855866	0.619934	1	0.263111	0.283651	0.312799	1.99172	1.67043	2.12365	0.85681	0.903031	0.654793	1	0.28749	0.290968	0.299189	2.2133	2.45028	2.74879	0.864537	1.10845	0.587864	1
CRELD2	0.49155	0.510759	0.528782	2.08512	2.08012	2.09344	0.961633	0.805679	0.550587	1	0.388711	0.420936	0.377201	2.65216	2.1772	2.84766	0.730144	0.767312	0.32644	1	0.351361	0.29625	0.324773	2.31002	2.13309	2.49811	0.650971	0.935449	0.406133	1
CREM	0.670027	0.939055	0.657861	0.5968	0.617073	0.770047	2.34133	3.17956	6.16186	1	0.624179	0.636631	0.571794	0.682295	0.583497	0.688028	4.06764	3.75811	3.44379	1	0.575458	0.61502	0.828743	0.933599	0.675024	1.08447	3.77395	3.97685	3.16428	1
CRIP2	1.87868	1.86076	2.20894	1.75075	1.60511	1.62261	1.07458	1.17695	1.20932	1	0.94353	0.904321	0.96115	1.15699	1.16896	1.27646	0.867185	0.883752	0.685446	1	0.888541	0.744372	0.750268	0.836827	0.956246	0.94416	1.0819	0.786758	1.15799	1
CRK	1.80455	1.84733	1.75811	0.686551	0.658165	0.55833	1.76184	0.441837	0.410705	1	1.72486	1.46038	1.53172	0.547531	0.62479	0.616656	0.62579	0.556595	1.03431	1	1.51264	1.5272	1.39509	0.706384	0.671855	0.667992	0.916303	0.756125	1.40969	1
CRKL	1.66413	1.75325	1.68305	0.707375	0.690098	0.592165	0.480116	0.51758	0.582126	1	1.71788	1.74229	1.61128	0.686636	0.760805	0.595189	0.514909	0.484446	0.565351	1	1.62958	1.65686	1.52978	0.691465	0.615131	0.563443	0.645941	0.629238	0.755502	1
CRLF3	1.50559	1.47489	1.45072	0.681933	0.678349	0.634627	0.527318	0.62066	0.633056	1	1.57385	1.51832	1.60483	0.490842	0.571072	0.396655	0.438912	0.362219	0.386857	1	1.71309	1.72547	1.74543	0.588767	0.512406	0.469544	0.484608	0.534749	0.454861	1
CRNKL1	0.346786	0.357261	0.314114	0.839668	0.933802	1.08555	3.55247	2.79348	3.15978	1	0.284764	0.283383	0.245177	0.987313	0.92954	1.06837	3.48563	3.12483	3.87094	1	0.321968	0.346716	0.322841	1.01348	1.19147	1.10351	3.33504	2.97383	5.23925	1
CROCC	0.963744	0.945553	0.931152	0.90347	0.921355	0.904866	1.1187	1.22967	1.47163	1	1.18618	1.24289	1.27657	0.970886	0.997859	0.911887	1.29603	1.62461	1.23049	1	1.3311	1.40144	1.47932	0.780534	0.679182	0.645373	0.453851	0.521555	0.567074	1
CROT	0.824945	0.967956	0.784211	1.70016	1.73914	1.53417	0.968671	0.681641	0.589514	1	0.959559	0.97707	1.01426	1.82972	1.7458	1.83541	1.12518	0.982255	0.980207	1	0.837713	0.902361	0.91809	1.47825	1.39061	1.58496	0.651467	0.727346	0.435407	1
CRTC1	1.10728	1.22695	1.73547	0.726027	0.848927	0.699616	1.24079	0.937341	1.17813	1	1.28482	1.23484	1.48355	0.655418	0.654526	0.91084	0.44612	0.348364	0.23781	1	1.65751	1.36192	1.59259	0.473353	0.774203	0.815156	0.415311	0.621463	0.599277	1
CRTC2	1.34047	1.18371	1.32969	0.841169	0.82289	0.871999	0.508391	0.608104	0.568651	1	1.28599	1.24505	1.34158	0.629016	0.728384	0.657	0.418691	0.595576	0.495949	1	1.29919	1.41727	1.28221	0.899899	0.872673	0.929807	0.705544	1.02985	0.529744	1
CRTC3	1.39017	1.36214	1.45351	0.747968	0.746333	0.749738	0.511341	0.603399	0.67362	1	1.42958	1.35505	1.41106	0.698706	0.733341	0.607174	0.583954	0.527044	0.39262	1	1.31479	1.43055	1.60055	0.863503	0.67508	0.613262	0.613642	0.695501	0.618482	1
CRY2	0.3226	0.385474	0.238535	0.804168	0.76519	1.13452	1.75532	2.0448	1.63018	1	1.18748	1.28902	1.10506	1.29904	1.25293	1.39914	0.940972	1.1791	1.77762	1	0.814411	0.941026	1.03312	1.12077	0.946799	1.03575	1.03218	0.969101	1.10054	1
CRYBG3	0.907424	0.881581	0.897186	1.25287	1.24025	1.28478	0.837015	0.783974	0.530055	1	1.81677	1.52425	1.2972	1.96348	1.91707	1.92268	1.37284	1.03155	1.29461	1	1.13823	1.13833	1.00235	0.97892	1.15361	1.0294	1.07127	0.819821	0.996908	1
CRYL1	1.4614	1.5209	1.44903	0.571756	0.603362	0.560071	0.862302	1.09704	0.988441	1	1.63794	1.69145	1.58135	0.576006	0.592688	0.460811	0.441883	0.498655	0.449972	1	1.79036	1.84471	1.89391	0.536354	0.517294	0.403081	0.370103	0.521321	0.645884	1
CRYZ	1.01844	1.01663	1.05157	1.79175	1.81373	1.74061	1.1455	1.13375	1.00654	1	1.01068	1.02785	1.0215	1.35694	1.3163	1.3837	0.70378	0.758974	0.697484	1	1.01483	1.03624	0.983331	1.14427	1.14616	1.1818	0.736812	0.745408	0.78875	1
CRYZL1	1.54762	1.62161	1.65636	0.829693	0.852558	0.658825	0.657107	0.815434	0.814058	1	1.52509	1.46184	1.55631	0.643826	0.657653	0.525314	0.388118	0.323868	0.399978	1	1.85872	1.84527	1.86224	0.606866	0.534093	0.4046	0.386008	0.496993	0.34453	1
CS	0.379066	0.396248	0.408153	2.03456	1.91596	2.22259	0.90601	0.990163	0.624193	1	0.318329	0.332553	0.336137	2.16783	1.89657	2.45926	0.637791	0.876434	0.482191	1	0.410664	0.422314	0.422822	2.17	2.23676	2.47246	0.975449	1.02253	0.674358	1
CSDE1	1.40519	1.36163	1.48552	0.740046	0.763898	0.774728	0.66651	0.759423	0.694926	1	1.60863	1.46831	1.59516	0.862243	0.897894	0.831642	0.527302	0.641563	0.66088	1	1.54795	1.61484	1.63925	0.743413	0.687312	0.60906	0.536467	0.606627	0.583995	1
CSE1L	1.91276	1.95451	1.93487	0.683228	0.661618	0.534852	0.500607	0.527743	0.533317	1	1.78836	1.9197	1.74866	0.656649	0.658942	0.499042	0.538692	0.543902	0.629766	1	1.62955	1.69128	1.59338	0.601779	0.52953	0.468292	0.627024	0.65077	0.739833	1
CSGALNACT2	0.446934	0.453717	0.371614	2.59984	2.31664	2.8936	0.893159	1.16297	0.477563	1	0.378522	0.367536	0.343567	2.22952	2.10381	2.15838	0.920403	0.816181	0.543258	1	1.26163	0.405269	1.30991	2.18706	2.27243	2.33599	1.01967	1.00076	0.738732	1
CSK	1.68356	1.67757	1.62461	0.745585	0.736801	0.647226	0.492842	0.562968	0.575657	1	1.6999	1.76287	1.66946	0.661034	0.701091	0.559288	0.465597	0.495246	0.593506	1	1.75467	1.80329	1.75031	0.677902	0.58877	0.515622	0.470721	0.583883	0.524835	1
CSNK1A1	0.800172	0.894908	0.895588	0.993103	1.11225	1.11504	2.1126	1.95926	3.18869	1	0.780762	0.852304	0.969976	1.03216	1.06187	1.12486	2.44859	2.55071	2.64885	1	0.77912	0.857264	0.804889	0.907226	0.903626	0.93286	2.06392	1.82359	2.7125	1
CSNK1D	0.522867	0.268557	0.443809	1.19774	0.979067	0.887442	1.11277	2.09816	1.71528	1	0.685388	0.618316	0.748674	0.854802	0.877173	0.804256	2.32671	2.22129	1.5688	1	0.345202	0.75236	1.25403	2.72512	2.22003	1.98872	2.35807	1.41729	2.03337	1
CSNK1G2	0.749538	0.818861	0.747696	1.35165	1.16502	1.4515	0.834386	0.871001	0.948582	1	0.920378	0.91254	0.899899	1.90842	1.2927	1.48213	1.84838	2.2388	2.1727	1	0.841334	1.0959	0.799515	1.74149	1.58361	1.6408	1.43584	1.88308	1.18835	1
CSNK2A1	0.896026	0.919077	0.854016	0.961744	0.994764	1.01657	1.37341	1.42762	1.61022	1	0.889847	0.866875	0.874046	1.10435	0.971592	1.04856	1.49943	1.41514	1.21391	1	1.0277	1.06426	1.21609	1.24123	1.14253	1.26934	1.2975	1.15777	1.57906	1
CSNK2A2	1.16418	1.21014	1.21925	0.942465	0.878336	0.997105	1.36476	1.44359	1.38544	1	1.17661	1.2069	1.12648	1.06417	0.937744	1.03072	1.42723	1.39545	1.224	1	1.04872	1.13476	1.09927	1.11371	1.06109	1.07082	1.17292	1.04793	1.38787	1
CSRP1	1.65233	1.63281	1.67711	0.802311	0.785367	0.725047	0.47732	0.582726	0.505895	1	1.67066	1.76333	1.70702	0.831469	0.877646	0.788883	0.475576	0.434931	0.503161	1	1.42973	1.51476	1.43393	0.693937	0.6627	0.623169	0.744191	0.739265	0.922028	1
CST7	0.678105	0.62214	0.65895	0.67552	0.795569	0.62849	0.532294	0.486662	0.973612	1	1.08696	1.08922	1.06297	1.068	1.10128	1.08831	1.2621	0.896152	1.21368	1	1.43904	1.37806	1.2675	1.59947	1.51156	1.55305	1.40016	1.17594	2.04729	1
CSTA	1.00668	0.766778	0.672396	1.6654	0.853103	1.08967	3.49732	2.68259	3.54353	1	0.629284	0.717537	1.11494	1.57898	0.985539	1.16774	1.88232	2.20562	8.55729	1	0.569094	0.410928	0.517025	0.64679	0.386032	0.9611	1.28269	2.35499	2.5987	1
CSTB	1.35188	1.42223	1.45201	0.761741	0.752896	0.627589	0.669825	0.64336	0.697234	1	1.81915	1.75215	1.81154	0.849538	0.9245	0.681022	0.786999	0.637866	0.924993	1	1.65157	1.62819	1.56771	0.728424	0.684546	0.625774	0.762638	0.680999	0.8931	1
CSTF1	0.403129	0.406176	0.423213	1.04878	1.17575	1.24687	2.50834	2.59976	2.95045	1	0.446838	0.48235	0.466138	1.03744	0.972517	1.16482	3.63567	3.67995	3.39414	1	0.475223	0.515246	0.455982	0.977927	1.1464	1.0021	3.01197	2.35127	3.22853	1
CSTF2	0.391551	0.299188	0.312229	1.097	1.17085	1.30985	1.89674	3.11331	3.61735	1	0.415732	0.39973	0.394715	0.975707	0.972762	1.08057	3.53407	3.17468	3.07138	1	0.548546	0.451316	0.432936	0.894777	1.02872	1.0035	2.70836	2.4222	2.61667	1
CSTF2T	0.371514	0.402152	0.408621	0.897304	0.986766	1.0783	1.97558	3.34787	3.89655	1	0.43969	0.486493	0.512437	0.923152	0.887824	0.992903	3.88569	3.5007	3.54035	1	0.459477	0.494128	0.479236	1.03104	1.23128	1.24915	3.52002	2.83213	3.20853	1
CSTF3	0.251072	0.245392	0.230931	0.902085	0.97679	1.09268	3.27853	3.16088	3.83012	1	0.315063	0.309022	0.294122	0.823727	0.817016	0.944682	4.03893	4.02678	3.77331	1	0.383904	0.400753	0.367265	0.931853	1.13736	1.02371	3.6557	2.87739	4.87692	1
CTBP1	1.16538	1.24077	1.34136	1.02244	1.05302	1.02451	0.651078	0.798244	0.62863	1	1.22798	1.19709	1.28897	1.18199	1.21699	1.20141	0.860518	0.916577	0.933788	1	1.25352	1.19149	1.26071	1.19742	1.0721	1.15712	0.821461	0.942745	1.0694	1
CTBS	1.22954	1.21012	1.29627	0.858089	0.883416	0.963506	0.521659	0.563393	0.685576	1	1.62047	1.48281	1.46854	1.13651	1.17388	1.41513	0.388645	0.610532	0.589465	1	1.63058	1.8513	1.76474	1.51278	1.36082	1.56081	0.794507	0.768665	0.741351	1
CTCF	0.329359	0.359524	0.344496	0.443046	0.457325	0.485563	3.95274	4.36622	5.47588	1	0.286659	0.256348	0.237999	0.420812	0.499691	0.491756	6.26555	5.27596	5.18468	1	0.302829	0.319938	0.278449	0.573897	0.603003	0.63054	5.03445	4.23009	7.27549	1
CTDNEP1	0.512995	0.455321	0.535553	1.41843	1.2314	1.31466	0.615099	0.77906	0.937697	1	0.604721	0.570357	0.599455	1.87951	1.53236	1.97721	0.978754	1.06338	0.915038	1	0.587365	0.609859	0.719746	1.84354	1.75194	2.2288	1.22748	1.46167	1.00052	1
CTDP1	1.00779	1.01766	0.948999	1.17077	1.14218	1.20539	0.691714	0.787651	0.597997	1	1.09385	0.972523	1.05875	1.35098	1.41498	1.41757	0.818393	0.851514	0.579447	1	0.957185	1.0927	0.967633	1.45336	1.40237	1.41203	0.788166	0.799677	0.691423	1
CTDSP1	0.324101	0.273863	0.335047	2.31924	2.22102	2.80809	0.679232	0.843397	0.475358	1	0.51956	0.474846	0.476983	2.31459	1.90349	2.45455	0.748099	0.817463	0.332322	1	0.423347	0.413785	0.458137	1.63016	1.82115	2.22112	0.468062	0.71882	0.317121	1
CTDSP2	0.456446	0.449053	0.524634	1.58041	1.50028	1.72357	0.729153	0.839677	0.694689	1	0.387461	0.36712	0.412498	1.86025	1.74095	1.96632	0.669565	0.872756	0.566758	1	0.36768	0.43202	0.438879	1.77575	1.90359	1.96072	0.626342	0.615225	0.428694	1
CTDSPL2	0.243461	0.249517	0.251304	0.440767	0.466241	0.540005	4.09926	4.10497	5.65562	1	0.246679	0.278615	0.236953	0.279854	0.40193	0.426915	6.08519	5.3777	4.71635	1	0.304298	0.298902	0.269649	0.365907	0.485699	0.423284	5.42833	4.7592	7.77985	1
CTH	1.01774	1.04622	1.0457	0.417153	0.459602	0.42773	0.399413	0.428716	0.42121	1	1.25328	1.03545	1.26486	0.722475	0.867387	0.647712	0.488279	0.440577	0.432489	1	2.05547	1.97483	2.21175	0.974158	0.820718	0.649067	0.866631	0.709918	0.665981	1
CTNNBL1	0.386028	0.373477	0.409784	0.902155	0.925324	1.00368	3.48687	3.04973	4.28856	1	0.51148	0.491854	0.495878	0.888599	0.899664	1.03819	3.59585	3.48335	3.34014	1	0.42193	0.469365	0.430125	1.04079	1.14443	1.15139	3.00679	2.49119	4.0053	1
CTPS1	1.66519	1.83057	1.77445	0.608113	0.600741	0.424813	0.338337	0.374305	0.408293	1	1.6737	1.75516	1.71422	0.571933	0.618362	0.460222	0.460273	0.446271	0.522313	1	1.8613	1.79588	1.74788	0.610126	0.593942	0.580358	0.479744	0.698016	0.768778	1
CTPS2	1.40059	1.39368	1.43197	0.744388	0.650481	0.564212	0.770965	0.631693	0.725521	1	1.37901	1.5783	1.40785	0.825757	0.757958	0.615372	0.377504	0.51264	0.533824	1	1.72271	1.70174	1.70406	0.750525	0.680309	0.625609	0.661103	0.566056	0.7245	1
CTR9	0.478679	0.471894	0.498234	0.743586	0.67524	0.748068	4.40098	3.14424	4.49076	1	0.339473	0.304929	0.354284	0.7606	0.743539	0.775914	4.74288	3.91261	4.05049	1	0.386473	0.396089	0.368681	0.732674	0.791311	0.760912	4.04364	3.6757	6.26168	1
CTSA	1.0345	0.997767	1.14144	1.06035	0.979341	1.14248	0.94096	0.63986	0.796458	1	1.26411	1.22237	1.20127	1.24896	1.12018	1.31024	0.771256	0.730703	1.06653	1	1.10152	1.03599	1.01775	1.68177	1.49035	1.80865	0.81935	0.826407	0.79698	1
CTSB	1.50594	1.56322	1.57025	0.90658	0.898166	0.835873	0.549389	0.634713	0.753979	1	1.48235	1.62273	1.50959	0.949507	0.909529	1.09522	0.591654	0.474972	0.873874	1	1.40544	1.43838	1.44473	0.918105	0.836035	1.03685	0.498681	0.628536	0.555358	1
CTSC	1.19675	1.42455	1.05082	0.807556	0.795008	0.813167	0.446086	0.44204	0.229163	1	1.18218	1.16519	1.20881	1.10776	0.922255	1.10738	0.49033	0.57341	0.856546	1	1.77847	1.71703	2.30113	1.72375	1.80157	1.93502	1.36515	1.12443	0.904912	1
CTSD	0.80022	0.845687	0.72917	0.983533	1.00034	0.946538	0.734497	0.952097	1.12495	1	1.08222	1.03711	1.0142	1.19406	1.27001	1.38198	1.08973	1.07381	1.18146	1	1.06513	1.11541	1.07164	1.32417	1.23644	1.42311	1.01612	1.14452	1.06508	1
CTSG	0.277833	0.278285	0.302607	0.6457	0.71397	0.673387	2.69562	2.49645	2.9238	1	0.360058	0.330111	0.342221	0.803984	0.628133	0.870816	2.51056	2.08199	2.03795	1	0.361372	0.36854	0.450732	0.561747	0.572886	0.711823	0.977028	1.07153	1.32231	1
CTSH	1.85774	1.93111	1.86723	1.27027	1.18859	1.02173	1.02932	0.897211	1.08591	1	1.43216	1.66158	1.507	1.13685	1.05622	1.10601	1.36468	0.833057	1.51838	1	1.09941	1.03128	1.00374	0.74807	0.691605	0.905637	0.64489	0.648439	1.01488	1
CTSL	1.46305	1.40163	1.31155	0.762982	0.998885	0.925826	0.585473	0.728801	0.819806	1	1.15672	1.16829	1.18731	1.2495	1.02446	1.25037	0.608708	0.698331	0.8981	1	1.39433	1.19125	1.22232	1.12828	0.901927	0.92738	1.49557	0.956403	1.55198	1
CTSS	1.10252	1.05932	1.1841	0.904839	0.948761	0.837384	0.626541	0.494924	0.654452	1	1.31101	1.31166	1.26292	1.20238	1.15176	1.33893	0.649439	0.638468	0.684762	1	1.27506	1.38093	1.3134	1.20113	1.17894	1.32341	0.875291	0.946494	0.846482	1
CTSW	0.560219	0.437798	0.488218	1.21584	1.27372	1.388	2.36288	1.6569	2.29595	1	0.477832	0.360499	0.397278	1.24502	0.990292	1.09655	3.21461	3.06053	2.22161	1	0.669737	0.734315	0.801183	1.94447	2.17002	2.08411	4.32297	3.09767	5.10474	1
CTSZ	1.46071	1.20833	1.50464	0.920219	0.951335	0.83591	0.395235	0.416705	0.379663	1	1.45413	1.44286	1.51237	1.24794	1.25993	1.51688	0.481429	0.632868	0.635415	1	1.24048	1.20662	1.20265	1.02176	0.920625	1.10733	0.760205	0.724203	0.7561	1
CTTN	0.562831	0.648368	0.578726	0.99375	0.916472	0.98549	1.83473	2.7239	3.61987	1	0.523782	0.612037	0.551947	0.717263	0.885834	0.79557	3.23293	1.85326	23.6393	1	1.13229	1.16487	0.914578	1.40267	1.40772	1.15267	2.59872	1.94422	2.57961	1
CTU1	1.58099	1.78793	1.69174	0.945959	0.978011	1.23628	0.666098	0.550823	0.772288	1	1.77622	1.81571	1.77094	1.13376	1.0233	1.03442	0.601673	0.391884	0.411041	1	1.40442	1.30767	1.29456	0.905148	1.15417	1.04547	0.494058	0.711095	0.596762	1
CTU2	1.87603	1.92451	1.98099	0.70723	0.710922	0.57508	0.381651	0.458179	0.648469	1	1.87566	2.1552	1.87548	0.662158	0.703691	0.582693	0.567712	0.78367	0.834669	1	2.1097	1.71984	2.03425	0.64697	0.427057	0.392057	0.520578	0.577374	0.199708	1
CUL1	1.33815	1.30987	1.34958	0.852769	0.803493	0.801044	0.626962	0.655272	0.584791	1	1.40659	1.40299	1.41135	0.923471	1.0011	0.937809	0.533397	0.684088	0.601157	1	1.38746	1.35065	1.39446	1.05411	0.991889	0.962929	0.7772	0.759012	0.774936	1
CUL2	1.31383	1.3705	1.41481	0.810467	0.866748	0.788822	0.585342	0.63419	0.633719	1	1.39375	1.47562	1.38914	0.765213	0.807443	0.731737	0.61615	0.634317	0.605244	1	1.536	1.53151	1.6241	0.915068	0.850531	0.807023	0.631143	0.704537	0.631009	1
CUL3	1.46148	1.4876	1.47138	0.845771	0.826271	0.800154	0.640549	0.679242	0.71434	1	1.43256	1.45975	1.44316	0.770899	0.819417	0.754029	0.600406	0.573534	0.595687	1	1.46014	1.47373	1.51918	0.907251	0.876118	0.830361	0.657468	0.626628	0.67867	1
CUL4A	1.26455	1.21802	1.24633	0.708954	0.709438	0.698973	1.16252	1.08126	1.21949	1	1.39197	1.4182	1.40383	0.810927	0.900738	0.795345	1.43472	1.31675	1.39004	1	1.23552	1.32266	1.3443	0.83757	0.808639	0.755758	1.44228	1.39412	1.82273	1
CUL4B	1.20607	1.20285	1.21985	0.93056	0.91466	0.945787	1.17943	1.15931	1.28187	1	1.11022	1.09986	1.07851	0.933534	0.951433	0.945055	1.14256	1.152	1.00044	1	1.13997	1.16901	1.21463	1.01988	1.09374	1.03665	1.18509	1.11998	1.40222	1
CUL5	1.43868	1.44473	1.39719	0.886699	0.85257	0.84535	0.521262	0.553679	0.451882	1	1.39127	1.40331	1.35449	0.876233	0.932452	0.846687	0.480171	0.547498	0.502806	1	1.51112	1.53373	1.5052	0.989614	0.960874	0.918741	0.653584	0.662845	0.671586	1
CUTA	1.55304	1.55913	1.49948	0.703113	0.705587	0.551578	0.585986	0.386401	0.241923	1	1.60092	1.71442	1.56743	0.732379	0.737711	0.613858	0.415719	0.474843	0.464692	1	1.76191	1.94883	1.86853	0.725452	0.681327	0.596888	0.565831	0.674296	0.687138	1
CUTC	1.08646	1.07175	1.08735	1.15946	1.20511	1.13141	0.769912	0.850094	0.874765	1	1.09479	1.05169	1.06924	1.37772	1.36618	1.43881	0.818134	0.962848	0.846931	1	1.10585	1.18598	1.2405	1.49837	1.35524	1.41047	0.805993	0.855386	0.662746	1
CUX1	0.344527	0.374225	0.390965	1.33583	1.27335	1.3431	1.81331	2.20995	2.60186	1	0.396092	0.357728	0.349252	1.51906	1.56826	1.66424	2.62868	2.44788	2.10211	1	0.364701	0.350712	0.388357	1.63587	1.59037	1.93733	2.56938	2.35415	2.55572	1
CWC15	0.383186	0.367617	0.332355	0.92613	0.977999	0.992756	2.20641	3.12861	3.8377	1	0.297745	0.261141	0.294316	0.951492	1.00154	1.0284	3.94719	3.45939	3.49281	1	0.304293	0.327458	0.418366	0.961273	0.989313	0.996874	3.39574	3.11882	3.49795	1
CWC22	0.430487	0.408132	0.388495	1.04952	1.18633	1.17185	2.76961	2.3285	2.81609	1	0.42179	0.410594	0.398537	1.06335	1.0056	1.02715	3.52202	2.71719	2.70963	1	0.422935	0.470796	0.412077	1.15116	1.17603	1.10335	3.28557	2.73063	4.80907	1
CWC25	0.410843	0.405245	0.457164	1.02933	0.938964	1.04497	2.93596	3.6357	4.82471	1	0.428336	0.369732	0.460461	1.01116	1.0406	0.96131	5.94541	4.31686	5.28195	1	0.558659	0.647679	0.602901	1.25232	1.07433	1.04748	3.05088	2.87571	3.11016	1
CWC27	0.700401	0.64697	0.715424	1.40127	1.52317	1.36302	1.34165	1.40988	1.75623	1	0.648585	0.662293	0.670831	1.484	1.5089	1.59171	1.86646	1.54909	1.36398	1	0.714744	0.690654	0.696907	1.33202	1.26695	1.29541	1.52704	1.33005	1.75504	1
CWF19L1	1.19718	1.24217	1.11807	1.14271	1.20539	1.22669	0.708395	0.812697	0.773479	1	0.967902	0.974356	0.918126	1.2731	1.28647	1.43635	0.757972	0.81745	0.740923	1	0.892622	1.01324	0.937594	1.26624	1.32024	1.31382	0.83919	0.883627	0.799359	1
CWF19L2	0.62643	0.603032	0.602086	1.12348	1.16403	1.22769	1.47996	1.67603	1.91566	1	0.526106	0.482185	0.549027	1.27911	1.21478	1.35791	1.90982	1.75009	1.62084	1	0.577784	0.613717	0.637637	1.49877	1.60291	1.62282	1.63626	1.40438	1.61736	1
CXCR4	0.423396	0.402806	0.515879	1.95069	1.80386	2.23484	1.20666	1.13509	1.13533	1	0.582861	0.525816	0.588957	2.67536	2.48168	2.86715	1.35048	1.40239	1.01381	1	0.458595	0.409563	0.411586	1.43538	1.44477	1.59381	0.6737	0.874189	0.576761	1
CXorf38	1.60132	1.59741	1.65462	0.82542	0.788823	0.828294	0.559988	0.664215	0.793293	1	1.63075	1.69783	1.6812	0.71916	0.710943	0.645726	0.536484	0.5233	0.43641	1	1.38628	1.2964	1.40332	0.853017	0.916068	0.711808	0.523678	0.651563	0.580981	1
CXorf56	0.775554	0.750653	0.696028	1.12873	1.18461	1.2001	1.59353	1.53854	1.95732	1	0.839097	0.745106	0.80976	1.32355	1.27774	1.40313	2.18518	1.67716	1.41784	1	0.777625	0.795274	0.768829	1.14503	1.04806	1.15294	1.7441	1.78462	2.09875	1
CXXC1	0.380346	0.379124	0.388417	1.07387	1.16416	1.3982	2.05889	2.31472	2.36537	1	0.350619	0.304194	0.317516	1.20232	1.13072	1.47291	2.84852	2.6371	2.60375	1	0.358488	0.428193	0.418534	1.3984	1.45956	1.4983	2.08499	1.82973	2.51943	1
CYB5A	0.611541	0.614066	0.596665	1.90566	1.69071	1.80768	1.16959	1.17497	1.39815	1	0.259473	0.265319	0.305847	2.01589	1.8357	2.12848	0.732208	0.796745	0.8063	1	0.414778	0.369235	0.349541	1.86537	1.99941	2.29866	0.845397	0.961326	0.52659	1
CYB5B	0.30631	0.277152	0.305443	2.14429	1.89931	2.10193	0.905373	0.788245	0.517879	1	0.335234	0.270928	0.310448	2.2953	2.08205	2.4484	0.724219	0.882169	0.642922	1	0.361267	0.309568	0.353053	1.98363	2.0502	2.40011	0.870284	0.970595	0.553196	1
CYB5R1	0.505118	0.502225	0.453795	2.14821	1.8715	2.18273	0.921662	0.965188	0.701053	1	0.377084	0.414601	0.380927	2.21136	1.88855	2.38065	0.853403	0.988105	0.771405	1	0.375519	0.330575	0.34797	1.97292	1.87812	2.23658	0.893554	0.955857	0.686847	1
CYB5R3	0.271531	0.309626	0.295099	2.20789	1.8916	2.31344	1.15271	1.12066	0.754417	1	0.277905	0.312104	0.283337	2.34507	1.8784	2.58959	0.970686	1.21369	0.816091	1	0.36251	0.349147	0.347453	2.0364	1.94915	2.33484	1.16242	1.23734	1.28899	1
CYB5R4	1.44616	1.48829	1.51347	0.645963	0.696947	0.601937	0.617294	0.638053	0.64137	1	1.54221	1.55543	1.58961	0.694415	0.537172	0.457733	0.579122	0.57856	0.709329	1	1.77074	1.78545	1.81025	0.714842	0.472432	0.395553	0.289051	0.447157	0.305435	1
CYBA	0.629969	0.56735	0.629463	2.10453	1.81558	2.30855	0.766782	0.884036	0.620826	1	1.27658	1.20821	1.09475	1.93994	1.7069	2.16153	0.867208	1.02499	0.669413	1	0.213139	0.261222	0.295347	2.33497	2.38733	2.71483	1.04227	1.21928	0.866731	1
CYC1	0.348568	0.346956	0.398594	1.96157	1.79882	2.11597	0.86401	0.885436	0.564187	1	0.332575	0.326599	0.374139	2.1828	1.72197	2.28175	0.614382	0.761667	0.51597	1	0.449048	0.412464	0.410491	2.26399	2.20064	2.50245	1.09952	1.10183	0.668671	1
CYCS	0.199513	0.203406	0.21651	2.69803	2.57106	2.37779	1.15308	0.968711	0.574717	1	0.156694	0.170918	0.176928	2.91598	2.46745	3.17833	0.611122	0.907343	0.441195	1	0.130877	0.137556	0.156877	2.30808	2.34171	2.55158	0.794601	0.859314	0.371289	1
CYFIP1	1.37295	1.4073	1.48068	0.886691	0.973904	0.980526	0.97068	0.961317	1.02785	1	1.94918	2.06231	1.85128	0.935036	0.891871	0.888286	0.441167	0.544564	0.912497	1	1.17553	1.35239	1.26798	0.861337	0.897158	0.79965	0.703107	1.05498	1.20485	1
CYFIP2	1.36198	1.45568	1.41833	0.97008	0.911137	0.885435	0.757952	0.697768	0.660028	1	1.3998	1.51191	1.47408	0.894744	0.916729	0.828816	0.713432	0.700054	0.647353	1	1.60225	1.65036	1.69437	0.906431	0.790615	0.717613	0.681194	0.717358	0.662155	1
CYHR1	0.895447	0.925126	0.879159	0.945674	0.927457	1.1202	0.483112	0.602272	0.510639	1	1.14227	1.07156	1.02565	0.974108	1.18276	1.37293	0.608229	0.68115	0.562851	1	1.0432	1.14562	1.03927	1.25105	1.21401	1.21952	0.584375	0.719438	0.585353	1
CYLD	1.63589	1.69981	1.71146	0.635534	0.591526	0.529523	0.487152	0.502968	0.5307	1	1.46104	1.5587	1.53026	0.650399	0.628245	0.481565	0.501576	0.541402	0.484811	1	1.63591	1.73384	1.67175	0.74965	0.668581	0.619817	0.465155	0.589479	0.605095	1
CYP20A1	0.317992	0.243288	0.289487	2.04283	1.96305	2.48304	0.776732	0.831942	0.458397	1	0.265284	0.290502	0.289666	2.54264	2.28196	2.83911	0.668865	0.879013	0.609669	1	0.341637	0.308994	0.336382	2.27128	2.29105	2.608	0.854285	0.978517	0.51477	1
CYP2U1	0.769231	0.727045	0.772645	1.53195	1.65105	1.70395	0.939439	0.791751	0.674576	1	0.281682	0.194816	0.206616	1.86804	1.6808	2.00047	0.484779	0.728672	0.416571	1	0.595995	0.509194	0.532116	2.12061	2.36212	2.62336	0.964015	1.10914	0.978942	1
CYP51A1	0.0867675	0.0921189	0.0939223	0.992526	0.906479	1.03168	0.45119	0.399761	0.252948	1	0.128933	0.140653	0.148904	1.29881	1.14974	1.43357	0.3731	0.534178	0.28677	1	0.456693	0.583774	0.633846	2.81094	3.27821	3.45148	1.13314	1.30462	0.733087	1
CYTH1	1.04898	1.12397	1.12824	1.11083	1.10043	1.06452	0.658579	0.632249	0.662825	1	1.18482	1.17554	1.26878	1.14371	1.10482	1.15894	0.684128	0.649684	0.772483	1	1.19588	1.26938	1.40877	0.957871	0.844129	0.8377	0.649619	0.590334	0.52756	1
CYTH4	1.23251	1.34805	1.35616	0.761535	0.762764	0.733819	0.817153	0.684695	0.736699	1	1.49267	1.34528	1.34333	0.92282	1.00297	0.955707	0.516765	0.598089	0.495176	1	1.50534	1.53421	1.54492	0.829292	0.840618	0.828188	0.652039	0.834353	0.620967	1
CYTIP	0.737611	0.825325	0.894279	1.63448	1.5557	1.72906	0.85983	0.965425	0.725374	1	1.04058	1.06614	0.974549	1.72309	1.49803	1.6492	0.82318	1.06447	1.00294	1	0.86157	0.846656	0.908749	1.45087	1.46916	1.1593	0.779975	0.952248	0.743828	1
D2HGDH	0.232965	0.249155	0.274908	2.31972	2.31623	2.43297	1.25016	1.22249	1.00153	1	0.384752	0.35283	0.362086	1.95684	1.8726	2.09128	0.38973	0.719394	0.252648	1	0.525276	0.419025	0.42779	1.85949	1.92629	2.19485	0.716618	0.85951	0.492743	1
DAAM1	0.655819	0.526367	0.459544	1.74179	1.66888	1.97369	1.28496	1.2685	1.21354	1	0.264862	0.203022	0.258063	1.32066	1.4068	1.46576	1.13225	1.03687	1.60067	1	0.35922	0.401007	0.346525	2.06868	2.34587	2.64138	1.03524	1.20355	0.907581	1
DAD1	0.415336	0.431763	0.338873	1.88519	1.97304	2.29615	0.905585	1.03956	0.681658	1	0.319788	0.325866	0.348693	2.20989	1.95775	2.16894	0.755322	0.970698	1.00605	1	0.477352	0.483861	0.475382	2.15055	2.42617	2.41162	1.05696	1.21059	0.995559	1
DAG1	0.332149	0.391027	0.386445	2.38911	2.25132	2.20149	1.0534	0.923843	0.677021	1	0.538806	0.468824	0.554684	2.12943	1.95113	2.20669	0.964127	0.954147	0.800219	1	0.569203	0.59659	0.408326	1.57966	1.67822	1.72012	0.749231	0.707469	0.580548	1
DAGLB	0.710293	0.704281	0.652316	1.15313	1.04388	1.45718	0.971081	0.862646	0.931138	1	0.642123	1.13563	0.921213	1.69825	1.16494	1.73285	1.05454	1.02964	1.14173	1	0.800755	0.639492	0.724452	2.21711	2.06817	2.05549	1.1032	0.964907	1.17625	1
DAP	1.47738	1.52803	1.42187	0.801156	0.785083	0.703276	0.839738	0.801491	0.785463	1	1.55878	1.69332	1.71106	0.768659	0.793361	0.666015	0.709022	0.635355	0.57825	1	1.44677	1.74326	1.49668	0.543165	0.579181	0.597385	0.430491	0.465548	0.32589	1
DAP3	0.364434	0.40327	0.400914	2.39648	2.33582	2.60458	1.09797	1.10144	0.721975	1	0.344119	0.273536	0.388688	1.86584	1.62368	1.95815	0.816128	1.05939	0.885361	1	0.446684	0.439923	0.490238	2.00394	2.01369	2.29551	1.14336	1.06423	0.819806	1
DAPK3	1.54984	1.26493	1.47347	0.761595	0.811256	0.700198	0.796254	0.683352	1.10752	1	1.54218	1.53414	1.84625	1.22441	1.37554	1.01875	1.39251	1.11563	1.0725	1	0.999096	0.965805	0.992799	0.790889	0.850387	0.795894	1.13706	1.11841	1.50165	1
DAPP1	1.44555	1.51494	1.56351	0.742862	0.848943	0.620827	0.851709	0.911081	0.79583	1	1.54667	1.35691	1.50312	0.7372	0.798051	0.720184	0.906007	0.820109	1.09889	1	1.56666	1.6878	1.3135	0.744663	0.865119	0.656186	1.01744	0.992101	1.15617	1
DARS	1.36893	1.39741	1.4197	0.827011	0.839535	0.736904	0.660927	0.621381	0.609581	1	1.32258	1.36279	1.39694	0.808049	0.775303	0.735797	0.579771	0.639696	0.644045	1	1.5416	1.51678	1.59676	0.876655	0.818056	0.793431	0.81833	0.917756	1.12214	1
DARS2	0.41378	0.41809	0.385844	1.88208	1.92098	1.84351	1.24245	1.21637	1.0142	1	0.347937	0.345431	0.372587	2.12945	1.85116	2.30471	1.02489	1.12752	0.871259	1	0.242584	0.269943	0.278671	2.14124	2.14303	2.44742	1.04581	1.02824	0.844084	1
DAXX	0.431892	0.423417	0.416581	1.05693	1.05218	1.12416	1.47995	2.20012	2.53445	1	0.396759	0.360222	0.452511	1.35618	1.30298	1.51307	3.09859	3.11259	3.15993	1	0.383469	0.432294	0.487424	1.38869	1.42517	1.65004	2.98251	2.47958	3.85059	1
DAZAP1	0.79874	0.748453	0.807568	1.73653	1.57835	1.90929	1.11834	1.47248	1.30438	1	0.69491	0.682003	0.641583	1.51419	1.38609	1.70351	1.36848	1.79035	1.5309	1	0.85776	0.863126	0.872419	1.37927	1.48733	1.3803	1.77252	1.38543	1.62231	1
DBI	1.78315	1.75975	1.70695	0.656169	0.660854	0.516699	0.50005	0.413582	0.530833	1	1.67789	1.75524	1.69317	0.600944	0.647203	0.456115	0.359705	0.345461	0.766524	1	1.86082	1.83872	1.83578	0.637594	0.556856	0.470737	0.334985	0.353661	0.338142	1
DBN1	0.616396	0.715256	0.642568	0.86354	0.87635	0.828291	1.45066	1.79553	2.26418	1	0.579182	0.623769	0.576333	0.565799	0.51909	0.644902	2.58281	1.53304	2.20578	1	1.01342	0.783885	0.682388	1.4119	1.57647	1.33751	2.92181	2.49309	3.98007	1
DBNL	1.66689	1.68406	1.64655	0.728346	0.672941	0.624185	0.579307	0.607917	0.695168	1	1.68667	1.66118	1.54697	0.669127	0.734128	0.638389	0.51158	0.543611	0.435112	1	1.77857	1.78178	1.70254	0.64236	0.58778	0.518764	0.539974	0.538547	0.574984	1
DBR1	1.25463	1.17344	1.24931	0.991326	1.02293	1.09806	0.586137	0.647796	0.60688	1	1.40007	1.19887	1.21166	1.15382	1.23858	1.33726	0.647301	0.739747	0.617042	1	1.1311	1.19955	1.23861	1.20829	1.14315	1.11463	0.592849	0.712265	0.545981	1
DBT	0.344696	0.348737	0.370969	1.92	1.79187	2.15207	0.816333	0.961034	0.718407	1	0.395766	0.36803	0.38977	1.99608	1.85172	2.29107	0.757616	0.942965	0.569099	1	0.368043	0.406485	0.400599	2.06885	2.09275	2.3753	1.07048	1.06292	0.654229	1
DCAF1	0.643811	0.567783	0.621753	1.40831	1.43421	1.58643	1.41085	1.17416	1.07189	1	0.651255	0.586443	0.635574	1.53425	1.53253	1.79142	1.01325	1.11033	0.896141	1	0.664646	0.659396	0.712046	1.66956	1.72772	1.69095	1.07831	1.0768	1.14713	1
DCAF11	1.15665	1.09187	1.21421	1.13802	1.04982	1.2666	0.781817	0.860984	0.798064	1	1.3578	1.2309	1.37659	1.18336	1.13466	1.08967	0.610353	0.764677	0.527638	1	1.10581	1.15926	1.02736	1.18715	1.2592	1.11471	0.629668	0.701702	0.631706	1
DCAF13	0.756037	0.783665	0.679061	0.844487	0.794123	0.832732	2.11441	2.43203	3.55328	1	0.732632	0.70376	0.685701	0.734891	0.842465	0.733919	3.40388	2.89864	2.44576	1	0.603693	0.636347	0.613638	0.657212	0.672107	0.604609	2.81304	3.3378	4.72999	1
DCAF16	1.62685	1.48545	1.67711	0.935529	0.926055	1.15495	1.74125	1.12289	0.84599	1	1.12546	1.15358	1.62602	1.15833	0.968301	1.27942	0.75816	0.872925	0.780341	1	1.38825	1.10802	1.62898	1.21335	0.979346	1.17771	0.945249	1.14421	0.823407	1
DCAF5	0.638157	0.644109	0.642053	1.28023	1.17463	1.271	1.03103	0.941039	1.07451	1	0.827691	0.774434	0.812376	1.31124	1.53047	1.5618	1.23545	1.393	1.25323	1	0.742566	0.786539	0.843263	1.52793	1.39025	1.60507	1.19248	1.11343	1.16752	1
DCAF7	0.823633	0.80404	0.861139	1.14456	1.09171	1.17133	1.22792	1.3603	1.44378	1	0.930899	0.913242	0.898818	1.30976	1.26789	1.33733	1.35104	1.42455	1.17665	1	0.937246	0.97232	0.984219	1.3907	1.32275	1.39728	1.55601	1.32308	1.42784	1
DCAKD	0.459848	0.420332	0.370497	1.94734	1.7498	1.89978	0.753783	0.866528	0.822725	1	0.255814	0.284537	0.320502	2.09571	1.68161	1.96843	0.578228	1.06677	0.884103	1	0.398703	0.50934	0.371967	2.00714	1.89638	1.94593	1.03557	0.983572	1.21601	1
DCD	1.02634	0.722483	0.637773	0.672181	0.981116	0.586731	4.19467	2.12597	3.39228	1	0.606301	0.501599	0.79894	1.11025	0.817234	0.886198	2.41441	2.39584	13.7505	1	0.816	0.538488	0.543792	0.825738	0.643857	0.717674	3.13426	1.92755	2.07424	1
DCK	1.69896	1.69358	1.71762	0.522718	0.536007	0.458177	0.274365	0.460271	0.404052	1	1.90614	1.78571	1.90268	0.694593	0.798205	0.681751	0.525029	0.530054	0.615024	1	1.63144	1.69953	1.70276	0.707792	0.637955	0.638301	0.435475	0.39224	0.476475	1
DCLRE1C	0.829263	0.755105	0.861943	1.72773	1.63385	1.88063	0.961881	0.955645	0.694685	1	0.529568	0.487575	0.56066	2.14487	1.9258	1.54335	0.73473	0.884587	0.750802	1	0.731691	1.01984	1.08334	1.63884	1.42369	1.49315	0.804498	0.753234	0.424445	1
DCP1A	0.868395	0.869587	0.913145	0.954364	1.02419	1.13657	1.16363	1.74898	1.65163	1	0.959617	0.998574	0.966768	0.978564	1.15665	1.00796	1.74369	1.89945	1.45893	1	1.03767	1.08775	1.1484	0.829692	0.968306	0.864347	1.69207	1.50973	1.94705	1
DCP1B	1.01144	0.98432	0.969372	0.88147	0.860932	0.949907	1.01659	1.19379	1.47913	1	1.07937	1.16576	1.17761	1.00785	0.934388	1.14062	1.66291	1.49131	1.29906	1	1.08364	1.1358	1.17382	0.955201	0.970606	0.851401	1.41919	1.44689	1.46735	1
DCP2	0.684279	0.670851	0.652549	0.678315	0.701582	0.823154	3.009	3.34918	4.06283	1	0.537554	0.456456	0.475855	0.709185	0.721074	0.825822	4.01545	3.21782	3.32361	1	0.512955	0.556838	0.6475	0.795687	0.916436	0.816071	2.98337	3.22028	4.98727	1
DCPS	1.53778	1.54517	1.42928	0.956345	0.961299	0.939686	0.685329	0.754766	0.616834	1	1.71914	1.60084	1.65887	0.828908	0.977537	0.863797	0.595455	0.615655	0.590177	1	1.24764	1.22311	1.15015	0.749562	0.748544	0.800231	0.589207	0.578934	0.58834	1
DCTD	1.68276	1.82635	1.74532	0.89207	0.891308	0.960632	0.461898	0.745201	0.656534	1	1.58935	1.74518	1.72741	0.630578	0.670702	0.721173	0.409708	0.427425	0.246841	1	1.94801	1.93523	1.99085	0.691196	0.56741	0.482018	0.465588	0.651161	0.765855	1
DCTN1	1.64158	1.65693	1.6077	0.722923	0.680882	0.615615	0.65916	0.678256	0.731235	1	1.5553	1.56633	1.52422	0.679458	0.701879	0.632132	0.641474	0.660654	0.710797	1	1.51561	1.58521	1.55415	0.718934	0.72345	0.673639	0.666835	0.687465	0.73091	1
DCTN2	1.60079	1.63186	1.58329	0.779384	0.790212	0.686417	0.65629	0.748322	0.795878	1	1.65168	1.65518	1.55866	0.746712	0.77242	0.726043	0.696853	0.708889	0.818384	1	1.58302	1.59989	1.58892	0.73312	0.627062	0.645603	0.683213	0.602297	0.638441	1
DCTN3	1.56444	1.49556	1.3742	0.813034	0.794789	0.753549	1.48027	1.19657	1.52688	1	1.47871	1.58473	1.52918	0.709619	0.713061	0.638797	0.581678	0.641714	0.578846	1	1.64298	1.68432	1.64106	0.697641	0.671174	0.616416	0.753994	0.70693	0.750348	1
DCTN4	1.54302	1.65186	1.76374	0.689897	0.649583	0.629982	0.594577	0.597249	0.54253	1	1.47189	1.56063	1.62275	0.724111	0.727927	0.595876	0.67735	0.903944	0.63938	1	1.5513	1.57171	1.54001	0.711472	0.638036	0.570533	0.869983	0.788306	0.967714	1
DCTN5	1.5104	1.63307	1.6162	0.896455	0.883572	0.692874	0.730019	0.794824	0.816633	1	1.57675	1.60186	1.65378	0.662014	0.786705	0.56247	0.574174	0.667622	0.561932	1	1.56094	1.66683	1.5391	0.715145	0.597874	0.478822	0.594	0.656986	0.646023	1
DCTN6	1.84729	2.01579	1.89445	0.851947	0.798739	0.686598	1.0151	1.12332	1.13699	1	1.65369	1.54373	1.46227	0.81509	1.11209	0.903439	0.873169	0.779306	1.26171	1	1.54491	1.55615	1.73553	0.695058	0.547171	0.464617	0.611543	0.695981	0.66335	1
DCTPP1	1.63716	1.7368	1.77064	0.897913	0.930044	0.789596	0.89224	0.756425	0.811707	1	1.7422	1.73301	1.57257	0.830199	0.872825	0.726122	0.711708	0.752678	0.690682	1	1.2728	1.20325	1.24642	0.618776	0.558661	0.467369	0.571419	0.876447	0.646486	1
DCUN1D1	1.50383	1.49646	1.6631	0.854501	0.85839	0.735716	0.567061	0.626249	0.706478	1	1.84857	1.74382	1.70301	0.779339	0.853928	0.757121	0.502848	0.540308	0.649747	1	1.50376	1.57754	1.46911	0.810625	0.757225	0.706014	0.505927	0.641664	0.66714	1
DCUN1D4	1.10757	1.10232	1.11356	1.35538	1.26064	1.50402	1.14956	1.4268	1.7416	1	1.05162	1.08779	1.02404	1.36601	1.39088	1.52558	0.889307	1.15147	0.727281	1	1.09024	1.02655	1.09762	1.22843	1.1802	1.1344	1.21704	1.03589	1.36778	1
DCUN1D5	1.03449	0.942887	1.07231	1.04489	1.07955	1.11229	0.634822	0.698345	0.724063	1	1.05573	1.04761	1.05564	1.19413	1.12576	1.33055	0.585068	0.765804	0.721778	1	0.96038	0.947939	1.07759	1.46273	1.33035	1.50339	0.812411	1.03368	0.829789	1
DCXR	0.718893	0.75336	0.728665	1.54261	1.47616	1.54611	1.15275	1.12709	0.950939	1	0.612525	0.658032	0.632788	1.60405	1.37968	1.60796	0.65514	0.786385	0.555227	1	0.862467	0.871733	0.890102	1.63831	1.57521	1.69044	0.733788	0.899236	0.645184	1
DDA1	0.737554	0.697075	0.694195	1.33535	1.37396	1.41821	1.13291	1.03151	0.900804	1	0.844072	0.860131	0.87755	1.30194	1.21348	1.44262	0.743688	0.970742	0.629153	1	0.656625	0.755125	0.562273	1.4014	1.22541	1.48113	1.12502	1.23633	0.997089	1
DDAH2	1.61638	1.6296	1.63345	0.690887	0.721785	0.705418	0.443285	0.586161	0.406353	1	1.80562	1.75039	1.74639	0.746189	0.722146	0.617044	0.298046	0.376126	0.47109	1	1.6149	1.59018	1.5113	0.710808	0.686686	0.639631	0.446415	0.493453	0.526234	1
DDB1	0.935743	0.909308	0.932447	0.85664	0.882205	0.888166	1.94964	2.18208	2.56154	1	0.932027	0.89856	0.933538	0.920493	0.943839	0.931616	2.53597	2.33534	2.46128	1	0.934328	0.963987	0.985235	1.0141	0.982247	0.980582	2.19322	1.90383	2.62044	1
DDB2	0.360654	0.391873	0.369121	0.59722	0.66761	0.668131	5.44392	4.90443	6.57563	1	0.505273	0.429889	0.547427	0.658403	0.8335	0.750761	4.17748	4.28351	3.46087	1	0.514396	0.508373	0.57108	0.912583	0.877954	1.01546	2.73195	2.54949	3.42519	1
DDHD1	0.880941	0.951439	0.827228	1.23767	1.3319	1.29595	0.548548	0.444831	0.51534	1	0.889504	0.948566	0.990563	1.42548	1.19826	1.33033	0.453421	0.606597	0.91921	1	1.11882	1.2648	1.1359	1.621	1.71776	1.59794	0.807708	0.883018	1.06542	1
DDHD2	1.35095	1.32397	1.35946	0.940269	0.941776	0.885902	0.672851	1.0398	0.824248	1	1.06942	1.06689	1.14722	0.722801	0.761857	0.690476	1.79142	1.22556	1.13523	1	1.49069	1.43623	1.32586	0.956536	0.900972	0.866106	0.396674	0.54961	0.287938	1
DDI2	1.54901	1.60762	1.62921	0.693414	0.646048	0.610172	0.373589	0.440961	0.389645	1	1.54418	1.58871	1.67874	0.744005	0.794488	0.644251	0.3818	0.459919	0.463074	1	1.65164	1.66314	1.73348	0.724388	0.6537	0.618578	0.458697	0.458473	0.407923	1
DDOST	0.451829	0.456619	0.457769	2.0803	2.07266	2.33125	1.2267	1.35019	1.15	1	0.294543	0.328825	0.328617	2.26149	2.0822	2.40792	1.12587	1.14771	0.978952	1	0.380249	0.374944	0.397644	2.01837	2.15247	2.3433	1.25865	1.25546	1.16947	1
DDRGK1	0.268574	0.273142	0.290795	1.96881	1.74906	2.00499	1.26517	1.2628	1.21158	1	0.219376	0.208079	0.206783	2.30451	2.00896	2.66125	0.97797	1.29845	0.80249	1	0.332085	0.341207	0.325032	1.93478	2.33691	2.5932	1.01388	1.05037	0.54873	1
DDX1	1.00203	0.980789	0.965256	1.06227	1.0767	1.18288	0.973819	1.09056	1.10402	1	0.975824	0.911523	0.95597	1.2297	1.27287	1.33297	1.28325	1.31135	1.12897	1	0.953188	0.997996	1.0069	1.26975	1.25621	1.29017	1.30679	1.16241	1.27037	1
DDX10	0.371018	0.461643	0.437682	0.46417	0.455806	0.557757	6.09224	4.62293	5.83787	1	0.340476	0.370345	0.374936	0.432823	0.584777	0.521752	4.76941	4.41514	4.36083	1	0.388216	0.40759	0.38607	0.551411	0.612922	0.583562	3.65624	3.46201	5.69104	1
DDX17	0.503909	0.478017	0.476822	1.02894	1.0962	1.24503	1.81325	2.65355	3.12182	1	0.459388	0.448278	0.470807	1.01907	1.01596	1.15732	3.23272	3.11905	2.88956	1	0.518649	0.578327	0.581605	1.14211	1.19371	1.21831	2.90985	2.32616	2.66583	1
DDX18	0.340983	0.343208	0.369012	0.434944	0.512882	0.496514	5.53899	4.27453	5.6523	1	0.269562	0.282463	0.26273	0.397759	0.424777	0.398402	5.40788	5.10522	4.93342	1	0.320858	0.304969	0.356692	0.471412	0.541677	0.512437	4.7063	4.03758	7.12475	1
DDX19A	1.44629	1.11707	1.68706	0.551677	0.761008	0.512721	0.924168	1.1592	1.68454	1	1.42454	1.49252	1.40836	0.611132	0.624434	0.551823	2.16183	1.87397	1.78466	1	1.4536	1.4493	1.56777	0.54382	0.603972	0.446524	1.09731	1.14987	1.10753	1
DDX20	0.764737	0.781558	0.720665	0.904618	0.949659	0.998376	1.01029	1.00061	1.1373	1	0.909446	1.01145	0.966015	1.00596	1.12897	1.09379	1.21921	1.24521	1.18888	1	0.964472	0.961698	0.997901	1.11965	1.13555	1.07485	1.20425	1.16865	1.3089	1
DDX21	0.302835	0.282597	0.295956	0.550405	0.60083	0.586301	4.19072	4.16415	5.63697	1	0.338954	0.339961	0.348065	0.573829	0.598917	0.591605	5.36312	4.45202	4.58913	1	0.418874	0.509755	0.422713	0.552737	0.679887	0.637439	4.25209	3.76234	6.84246	1
DDX23	0.335052	0.34154	0.327295	0.970497	1.023	1.16847	2.56793	3.36023	4.16505	1	0.392162	0.356867	0.379472	1.00562	1.04217	1.12077	3.98707	3.49089	3.26823	1	0.355129	0.402369	0.374716	1.16192	1.22647	1.23907	3.37958	2.64893	3.748	1
DDX24	0.583443	0.532088	0.58579	1.03248	1.08736	1.18131	3.13592	2.86061	3.43146	1	0.449382	0.429125	0.461689	0.912839	0.937166	0.960127	2.95813	2.63808	2.52529	1	0.541167	0.515379	0.561815	1.20916	1.31349	1.26645	2.65961	2.426	3.42007	1
DDX27	0.426731	0.416137	0.410124	0.662099	0.680731	0.683636	4.57039	3.7034	4.77607	1	0.397665	0.459578	0.4094	0.691886	0.664586	0.699854	4.52121	3.92629	4.14456	1	0.410369	0.394982	0.373942	0.726939	0.797135	0.739468	3.97858	3.41114	5.96227	1
DDX28	0.510918	0.450472	0.481628	1.83793	1.79293	2.08468	1.11075	1.23613	1.12631	1	0.279716	0.24709	0.314585	2.06031	1.80995	2.19252	1.28979	1.16824	1.03307	1	0.298253	0.316632	0.333958	1.66711	1.75827	1.95539	1.35129	1.24028	1.28398	1
DDX31	0.56321	0.524552	0.589144	1.09907	1.02667	1.08527	2.58108	2.56591	3.32521	1	0.377351	0.376707	0.30284	0.783868	0.765572	0.872619	3.46637	3.48289	2.83913	1	0.501579	0.588312	0.502239	0.767816	0.928858	0.849295	3.34563	3.05556	4.53362	1
DDX39A	0.395128	0.384442	0.391667	1.13002	1.15197	1.22864	3.31519	2.83844	3.66699	1	0.278801	0.274934	0.28618	1.05129	1.01015	1.20375	3.31542	3.23997	2.91345	1	0.364256	0.393273	0.400112	1.30041	1.47447	1.42877	2.91744	2.46697	3.42941	1
DDX39B	0.372442	0.352294	0.408781	1.15615	1.23968	1.2301	3.06451	2.52527	3.2318	1	0.30536	0.301668	0.317796	1.10775	1.09483	1.24377	3.44696	3.44062	3.02809	1	0.394108	0.420268	0.428502	1.22197	1.33211	1.32119	2.83963	2.43856	3.5526	1
DDX3X	1.45963	1.43737	1.43036	0.910464	0.948422	1.03405	1.31622	1.53519	1.66821	1	1.07723	1.09003	1.10014	0.777914	0.752604	0.768564	1.50311	1.30821	1.33542	1	1.09988	1.07117	1.06627	0.718317	0.790191	0.716539	1.0298	1.00244	1.35929	1
DDX41	0.644766	0.615603	0.645826	1.08062	1.13613	1.26494	1.64097	2.04539	2.25328	1	0.491502	0.503829	0.501308	1.23225	1.1288	1.26895	2.9525	2.57958	2.11807	1	0.562416	0.600824	0.56174	1.20258	1.20431	1.25896	2.72372	2.43619	3.17599	1
DDX42	0.407158	0.374593	0.387045	1.33026	1.37431	1.6148	1.90006	2.26257	2.26027	1	0.347864	0.339752	0.36759	1.46313	1.3792	1.67853	2.56098	2.49795	2.11392	1	0.439116	0.508576	0.4907	1.49286	1.51304	1.55121	1.95276	1.62244	2.36125	1
DDX46	0.559503	0.554475	0.541871	1.44748	1.59034	1.69696	1.26848	1.32771	1.40177	1	0.514262	0.501859	0.532571	1.64885	1.64573	1.85089	1.1784	1.26167	0.933634	1	0.563346	0.620739	0.644859	1.78278	1.85816	1.92013	1.1845	1.05596	1.09227	1
DDX47	0.423933	0.427488	0.389298	0.710716	0.701771	0.71727	2.88529	3.36153	4.47374	1	0.450944	0.431955	0.462874	0.696221	0.721645	0.735789	4.36651	3.95061	3.89227	1	0.529493	0.470862	0.512087	0.724236	0.778732	0.747407	3.21619	2.68286	4.40754	1
DDX49	0.524598	0.517024	0.498592	0.629884	0.647074	0.705208	2.81163	3.50926	4.5191	1	0.606411	0.544265	0.652484	0.781961	0.697196	0.683187	4.97669	5.11422	4.45426	1	0.628624	0.499384	0.509259	0.596197	0.584886	0.572125	3.35456	3.01853	4.46019	1
DDX5	0.407448	0.378414	0.385204	0.916062	0.976877	1.1879	2.36907	3.25031	4.1371	1	0.431299	0.392374	0.376117	0.878586	0.884728	1.03674	4.07869	3.78093	3.49835	1	0.514841	0.52657	0.44874	0.813371	0.929328	0.907306	3.40498	2.78407	3.72422	1
DDX50	0.374268	0.378955	0.425477	0.87313	0.945441	1.05905	2.3935	3.20273	3.63624	1	0.404682	0.364446	0.372784	0.879568	0.857054	0.995791	3.98979	3.45542	3.21449	1	0.367919	0.471683	0.441362	0.895995	0.980274	0.956616	4.06989	3.07739	5.23828	1
DDX51	0.517095	0.53342	0.567954	0.6947	0.56563	0.73709	3.61877	3.00807	4.87854	1	0.487107	0.518755	0.442337	0.468868	0.598187	0.489357	4.10894	3.67395	3.93904	1	0.467562	0.487942	0.439287	0.546522	0.749026	0.603094	3.65678	3.6362	5.21643	1
DDX52	0.314764	0.319703	0.33417	0.507317	0.622809	0.526038	5.50814	4.77771	6.89111	1	0.255691	0.247191	0.272407	0.457468	0.479336	0.470063	4.55722	4.43166	5.05802	1	0.446925	0.470105	0.388065	0.448723	0.541637	0.531677	4.25758	3.57051	5.79808	1
DDX54	0.355065	0.365218	0.384406	0.556244	0.603974	0.613696	3.52258	3.78904	4.38562	1	0.469634	0.444124	0.47594	0.725411	0.728146	0.596842	3.20255	2.94734	3.53562	1	0.703651	0.627321	0.671678	0.587217	0.72832	0.588065	4.13468	3.88614	6.46627	1
DDX55	0.636551	0.577193	0.609767	1.24234	1.32148	1.46772	1.72364	1.68336	1.91665	1	0.654632	0.60616	0.651915	1.338	1.40075	1.47299	1.81277	2.03658	1.63047	1	0.642605	0.702488	0.734249	1.31579	1.36926	1.37529	1.83833	1.65311	2.18048	1
DDX56	0.618647	0.644009	0.626787	0.971311	1.01771	1.04771	2.16765	2.12714	2.49657	1	0.687219	0.614344	0.62557	1.00131	0.92164	0.898756	2.37235	2.12678	1.93248	1	0.754635	0.653253	0.598282	0.953248	1.05969	1.00372	2.6294	2.77939	3.96082	1
DDX58	1.70429	1.71241	1.69632	0.609732	0.616179	0.529264	0.519415	0.557651	0.525268	1	1.69271	1.70591	1.65063	0.6619	0.665888	0.53896	0.478297	0.50624	0.472075	1	1.67337	1.64627	1.6222	0.706474	0.62312	0.591323	0.558672	0.56319	0.577404	1
DDX59	1.30163	1.317	1.26766	0.895331	0.971761	1.02247	0.691192	0.64366	0.661113	1	1.36354	1.3212	1.26785	1.08314	1.24364	1.22843	0.782913	1.02621	0.757718	1	1.26016	1.372	1.43235	1.15255	1.20176	1.25317	0.760877	0.82665	0.569797	1
DDX6	0.965957	0.940994	0.963895	1.03673	1.07344	1.1095	1.07236	1.46319	1.39379	1	1.03101	0.982362	0.978329	0.980199	0.960955	1.04537	1.49361	1.51599	1.52095	1	1.1236	1.15622	1.14363	1.01444	0.984208	1.03482	1.26995	1.17732	1.47999	1
DDX60	1.57674	1.60575	1.62568	0.724297	0.697874	0.697224	0.834744	0.792452	0.862326	1	1.57366	1.56371	1.61623	0.721745	0.711589	0.608156	0.860549	0.819481	0.86349	1	1.5394	1.59051	1.57702	0.624382	0.574737	0.493964	0.742426	0.681249	0.869335	1
DDX60L	1.23844	1.01213	1.00428	0.774056	0.833202	0.875941	0.929474	0.823441	0.840108	1	1.21343	1.21881	1.30643	0.769397	0.737007	0.695159	0.795884	0.84234	0.849402	1	1.45619	1.53407	1.51572	0.917883	0.89566	0.779838	0.984627	0.934352	1.18663	1
DEAF1	0.224607	0.240696	0.257997	0.820134	0.745991	0.868473	2.18401	3.47187	3.86572	1	0.274582	0.279156	0.178727	0.87413	0.862519	1.06303	3.28708	3.59639	3.89189	1	0.369509	0.394205	0.389486	0.97735	1.27093	1.17159	3.8907	3.07311	3.16343	1
DECR1	0.260459	0.29694	0.309038	1.83102	1.87847	1.78509	1.92099	2.18139	2.34568	1	0.296003	0.269674	0.252913	1.91385	1.73624	2.06006	2.14481	2.19543	1.83961	1	0.338528	0.348621	0.355649	1.73778	1.80273	1.98755	1.84634	1.70622	1.91137	1
DEF6	1.04948	1.07021	1.03102	1.18873	1.23427	1.3196	0.775879	0.932122	0.768866	1	1.19392	1.06452	1.1021	1.15976	1.36181	1.39759	0.649833	0.794657	0.576023	1	1.23819	1.26713	1.2042	1.00632	1.11018	1.1506	0.655355	0.667311	0.60744	1
DEGS1	0.462	0.452636	0.402779	2.25098	1.98399	2.15089	0.674523	0.757354	0.288628	1	0.251487	0.26342	0.259217	1.74313	1.66381	1.88348	0.864235	1.0789	0.781125	1	0.805987	0.864815	0.838127	1.40839	1.45227	1.62549	0.540563	0.649442	0.408138	1
DEK	0.513786	0.494876	0.477659	0.793374	0.816804	0.721296	2.79384	3.49775	4.82646	1	0.497537	0.4566	0.520018	0.833618	0.876374	0.977095	3.97267	3.65321	3.19709	1	0.524118	0.54064	0.541995	1.24733	1.17228	1.3536	2.51059	2.25329	3.00665	1
DENND1A	0.852408	0.794222	0.848444	1.32327	1.11493	1.31153	0.949481	0.861477	0.944372	1	0.938182	0.967481	1.00905	1.63155	1.42439	1.53218	0.763488	1.2295	0.708197	1	0.830952	0.799522	0.7886	1.55574	1.60439	1.69024	0.849524	1.05709	0.987726	1
DENND1B	0.885485	0.90602	0.931896	1.73196	1.73666	1.95367	0.816272	0.938989	0.656988	1	0.870367	0.949717	0.720419	1.30539	1.30697	1.33171	0.705134	0.806739	0.903644	1	0.971467	0.880287	0.916809	1.46694	1.87695	1.67008	0.770611	1.10231	0.790144	1
DENND1C	1.26137	1.30931	1.26932	1.19921	1.04789	1.09844	0.64585	0.68923	0.582208	1	1.46361	1.50675	1.32712	1.21405	1.0873	1.11286	0.68626	0.727937	0.65855	1	1.16606	1.17394	1.2578	1.10128	1.09212	1.00232	0.668122	0.707433	0.582079	1
DENND2D	0.748026	0.794231	0.804418	0.905794	0.882221	0.914211	2.46428	1.97289	3.02305	1	0.758628	0.993944	0.767573	0.792536	0.689158	0.784	2.28275	2.31206	2.58135	1	0.765241	0.741737	0.784808	1.01663	1.09167	1.0152	2.30244	2.04625	3.1293	1
DENND4A	1.01635	1.10494	1.20797	1.29321	1.16699	1.22794	0.86435	0.947115	0.856646	1	1.23016	1.49199	1.57235	1.51402	1.29528	1.20449	0.585885	0.796683	0.854785	1	0.900089	0.976913	0.98473	1.24268	1.18854	1.13311	0.772503	0.789079	0.560423	1
DENND4B	1.29465	1.29425	1.37574	0.95356	0.87638	0.935139	0.869352	0.799103	0.818017	1	1.20797	1.3808	1.52203	1.01242	0.930658	0.835502	0.77716	0.888401	0.926954	1	1.19002	1.18857	1.40038	1.07519	1.06885	0.937397	0.896441	1.07522	0.993813	1
DENND4C	1.18574	1.19468	1.26703	1.21308	1.12615	1.06459	0.666382	0.639524	0.514684	1	1.32979	1.52068	1.48311	1.37999	1.1128	1.07323	0.597423	0.664346	0.714791	1	1.14041	1.21693	1.29827	1.22061	1.09765	0.960583	0.665993	0.649154	0.494678	1
DENR	1.5193	1.60467	1.50073	0.992078	0.976251	0.860815	0.559027	0.620774	0.583032	1	1.56997	1.56146	1.48513	0.873394	0.837587	0.748458	0.4042	0.461857	0.366443	1	1.69442	1.66685	1.54919	0.794353	0.786829	0.655546	0.485572	0.5923	0.533446	1
DEPDC5	0.947621	0.97385	0.935691	0.841803	0.763437	0.817211	1.22092	1.32411	1.30847	1	0.999812	1.20342	1.05399	0.84348	0.951305	0.861481	1.67158	1.45512	1.93379	1	1.03685	1.10537	1.13413	0.94301	0.967008	0.836241	1.72043	1.32022	2.162	1
DEPTOR	1.33988	1.35136	1.53665	0.761322	0.774176	0.627564	0.423292	0.656174	0.76291	1	1.08285	1.13754	1.35114	0.962692	1.01019	0.959444	0.974713	0.75105	3.84668	1	1.69704	1.49302	1.28523	0.931752	0.96143	1.1954	1.08702	1.41847	0.536855	1
DERA	1.76851	1.70537	1.79248	0.617433	0.606073	0.483307	0.521655	0.477303	0.573969	1	1.44363	1.63114	1.58942	0.546581	0.595809	0.490898	0.360035	0.422475	0.411647	1	1.56005	1.64745	1.59471	0.645562	0.594559	0.468559	0.444827	0.590509	0.600965	1
DERL1	0.0436239	0.066686	0.0823626	1.95203	1.81264	2.457	0.6756	0.662434	0.14707	1	0.0900131	0.106574	0.107456	2.79569	2.29402	2.8655	0.446578	0.572832	0.181086	1	0.0442012	0.0601591	0.102379	3.18367	3.20287	3.9517	0.63808	0.786561	0.130863	1
DERL2	0.136504	0.181244	0.147078	2.37443	2.16866	2.67969	0.908849	0.729165	0.221474	1	0.138504	0.136598	0.124869	2.42035	2.3136	2.75152	0.641589	0.752197	0.31566	1	0.285153	0.335237	0.339594	2.1952	2.19269	2.57191	0.932297	1.17294	0.856256	1
DFFA	1.46672	1.45701	1.41182	0.878999	0.939367	0.899955	0.453708	0.471599	0.401547	1	1.46408	1.42306	1.42253	0.915845	1.11433	0.990689	0.508811	0.499057	0.579924	1	1.45509	1.4635	1.42424	1.047	0.999002	1.07636	0.604393	0.577072	0.557732	1
DFFB	1.22187	1.216	1.1372	0.886143	0.951268	0.92129	0.802037	0.84352	0.897902	1	1.40314	1.38599	1.38895	1.15362	1.49699	1.52593	1.60098	1.27324	1.59475	1	1.3577	1.26474	1.39209	1.28905	1.35152	1.52068	0.761112	0.731647	0.827359	1
DGAT1	0.306501	0.432729	0.194901	1.71952	1.46239	1.68699	1.11697	0.786464	0.928528	1	0.31389	0.383828	0.269264	1.92582	1.5881	2.30006	1.09467	1.0812	1.01606	1	0.315227	0.282282	0.391119	1.78743	1.77256	2.01304	1.19281	0.991246	0.866559	1
DGCR14	0.527964	0.554342	0.541195	1.06619	1.12018	1.24841	1.50704	2.23672	2.37917	1	0.464514	0.41118	0.484746	1.03321	1.12046	1.06027	3.25995	2.20234	2.08242	1	0.557985	0.511237	0.609603	1.2961	1.46699	1.33487	2.58914	2.40858	2.89919	1
DGCR8	0.449728	0.45693	0.445542	1.0169	1.13073	1.25867	1.89372	2.12251	2.49367	1	0.545944	0.551358	0.499352	1.26601	1.06334	1.26775	3.78006	3.18486	2.29297	1	0.491154	0.494943	0.521776	1.21307	1.32474	1.28698	2.08124	1.71596	2.37529	1
DGKA	1.70998	1.79168	1.70823	0.714047	0.691163	0.63914	0.416474	0.555841	0.473393	1	1.59055	1.57865	1.49948	0.707267	0.729398	0.620478	0.382465	0.427905	0.362801	1	1.57315	1.57631	1.5975	0.731014	0.695661	0.648667	0.485064	0.530718	0.505239	1
DGKE	0.275375	0.300809	0.243086	1.8536	1.82739	2.18755	2.00403	2.07391	2.13019	1	0.267812	0.2816	0.295397	1.86396	1.60774	2.03342	2.02626	2.0245	2.36221	1	0.361879	0.367309	0.385622	1.61044	1.70566	1.88525	1.73625	1.53588	2.05409	1
DGKQ	1.42854	1.35706	1.4911	0.89158	0.905513	0.82171	2.15225	1.71424	2.55855	1	1.12893	1.12294	1.06344	0.737252	0.873481	0.616545	0.863426	0.87348	1.72746	1	1.31395	1.42958	1.47796	0.839722	0.791404	0.766341	0.929112	0.732931	0.752723	1
DGKZ	1.36703	1.35416	1.38206	0.825857	0.822075	0.826005	0.879566	0.915115	1.00918	1	1.34897	1.31037	1.25684	0.829006	0.857706	0.796897	0.881499	0.852587	0.92876	1	1.33884	1.45636	1.35497	0.797882	0.751091	0.75913	0.733073	0.718512	0.809942	1
DGUOK	0.511864	0.475089	0.527297	1.81922	1.67565	1.85813	0.790749	0.904759	0.60358	1	0.401436	0.45609	0.414255	2.14132	1.88806	2.26792	0.751962	0.871209	0.673421	1	0.514718	0.52198	0.54346	1.86008	2.05098	2.05471	0.871541	1.03615	0.710451	1
DHCR24	0.193029	0.193756	0.153081	0.956264	0.876069	1.07432	0.328599	0.520429	0.261848	1	0.639612	0.659125	0.717226	1.41686	1.37247	1.5409	1.20932	1.10655	3.64569	1	0.632783	0.691963	0.667995	2.80905	2.76313	3.14548	1.21593	1.16589	0.776141	1
DHCR7	0.167091	0.207653	0.206017	2.00373	1.72503	1.99083	1.00412	0.961514	0.549262	1	0.19747	0.214474	0.212691	1.95628	1.50251	2.19309	0.831123	0.989839	0.700941	1	0.150049	0.206159	0.239202	2.6211	2.27675	2.79961	1.40022	1.51343	1.01695	1
DHODH	0.41304	0.402445	0.421891	2.41465	2.17214	2.29198	0.949975	1.00749	0.628061	1	0.250541	0.316169	0.287417	2.08703	1.93054	2.31404	0.780991	0.931722	0.633892	1	0.430994	0.455269	0.393049	1.71089	1.63843	1.91148	0.988443	0.910931	0.691584	1
DHPS	1.45034	1.46787	1.36103	0.768775	0.787535	0.736938	0.685721	0.767471	0.74812	1	1.27169	1.15995	1.30191	0.834354	0.77349	0.822632	0.962572	0.813979	0.821163	1	1.60251	1.53451	1.51741	0.954982	0.976265	0.925351	1.02967	1.10671	1.16501	1
DHRS1	0.350836	0.393499	0.392515	2.36971	2.09926	2.56516	0.880895	0.994811	0.592319	1	0.364899	0.370565	0.464607	2.26884	1.98543	2.36314	0.786969	0.947655	0.499233	1	0.432246	0.436752	0.486916	1.98134	1.96751	2.33821	0.777112	0.89614	0.536054	1
DHRS13	0.399616	0.537455	0.366334	1.59208	1.66266	1.83727	0.776724	1.02623	1.40419	1	0.349574	0.364224	0.285532	1.67947	1.5681	1.85427	1.06101	1.17374	0.675652	1	0.536799	0.548472	0.527346	1.25523	1.31284	1.42821	1.06865	1.13336	0.855528	1
DHRS3	0.477846	0.534127	0.394955	1.83826	1.81082	1.99606	1.10947	1.06777	0.949343	1	0.657957	0.631807	0.544754	2.04453	1.76996	2.25107	1.08598	1.38469	1.4382	1	0.496953	0.573611	0.439019	1.69615	1.79901	2.11413	1.01455	0.913234	0.709682	1
DHRS4	0.545651	0.567866	0.637159	1.96806	1.89245	2.01275	1.31447	1.39453	1.35125	1	0.440648	0.440478	0.448976	2.19183	1.75756	2.10703	1.22015	1.27484	1.06338	1	0.38353	0.496863	0.438898	1.92313	1.941	2.0079	1.21105	1.2316	1.31141	1
DHRS7	0.43131	0.47534	0.458139	2.16592	2.04659	2.36988	1.03557	1.02059	0.861992	1	0.420946	0.412459	0.390875	2.60762	2.41017	2.89046	0.715452	0.99382	0.57182	1	0.376448	0.353783	0.38695	2.04826	2.25622	2.38542	0.80572	0.963615	0.548625	1
DHRSX	0.604292	0.618851	0.617698	1.75285	1.56785	1.90117	0.816516	1.12122	1.09604	1	0.222525	0.246417	0.256487	2.30087	2.25647	2.40237	0.86381	1.07138	0.65512	1	0.0641968	0.0879048	0.120339	2.28219	2.78366	2.90769	0.805101	0.80675	0.467844	1
DHTKD1	0.513179	0.631508	0.519805	1.94697	1.98425	2.28925	1.28304	1.47209	0.769347	1	0.306717	0.423201	0.467465	2.43855	2.06484	2.63621	0.836977	1.09697	0.535835	1	0.39787	0.33905	0.326945	1.89544	1.82907	2.03737	0.844185	1.09597	1.04229	1
DHX15	0.911094	0.8881	0.890874	0.96046	0.995867	1.09331	1.30582	1.52493	1.68568	1	0.905309	0.803338	0.839024	1.04838	1.11485	1.11188	2.09667	1.74878	1.94027	1	0.877593	0.905697	0.916472	1.13858	1.08945	1.10834	2.09618	1.94955	2.84253	1
DHX16	0.51457	0.50188	0.486599	1.22801	1.2793	1.42881	2.02816	1.66204	2.08682	1	0.548086	0.572164	0.594466	1.38963	1.34372	1.3477	2.38777	1.98821	2.2878	1	0.545944	0.565004	0.602857	1.30005	1.32336	1.32696	2.02364	2.01852	3.19024	1
DHX29	1.36834	1.30164	1.2942	0.845292	0.917191	0.949456	1.12159	1.01333	1.11435	1	1.4647	1.38867	1.41095	0.898108	0.934022	0.923343	0.989427	1.12216	1.03651	1	1.2389	1.37166	1.29575	0.885378	0.84126	0.762866	0.842723	0.77352	0.881571	1
DHX30	0.974091	0.991089	0.967833	1.10393	1.10974	1.22657	1.28576	1.22483	1.2485	1	0.9573	0.945411	0.953183	1.25897	1.15088	1.32592	1.2905	1.27971	1.30079	1	1.01101	1.02699	1.07586	1.16658	1.17968	1.20556	1.26132	1.24848	1.58461	1
DHX33	0.397138	0.411955	0.452138	0.489785	0.566523	0.511005	3.06677	3.34079	4.45962	1	0.422694	0.338033	0.424985	0.472015	0.463793	0.48141	4.35239	3.62986	3.5674	1	0.527616	0.466523	0.566498	0.70851	0.702113	0.776998	3.23036	3.5445	5.60933	1
DHX34	0.567997	0.51941	0.564283	1.18688	1.18014	1.04434	2.76599	2.41836	3.81185	1	0.484273	0.470809	0.423785	0.894067	0.87948	0.892223	3.37339	3.40073	4.07043	1	0.441628	0.425476	0.486041	1.13894	1.00097	0.961082	3.82429	2.90914	5.74582	1
DHX35	0.524885	0.48252	0.508187	1.02641	1.06032	1.19353	1.65791	1.75844	2.1012	1	0.595076	0.612944	0.6063	1.4411	1.31712	1.56227	2.59954	2.48736	2.58663	1	0.685578	0.659261	0.717802	1.25258	1.35887	1.25084	1.95852	1.81949	2.33663	1
DHX36	1.03044	1.02273	1.08412	1.05813	1.09502	1.04897	1.22674	1.24946	1.37977	1	1.06172	1.07159	1.10787	0.88529	0.936789	0.957477	1.79309	1.59323	1.42708	1	1.09931	1.14907	1.12543	0.824601	0.811717	0.74032	1.6063	1.50076	2.20588	1
DHX37	0.616679	0.554248	0.518582	1.0155	0.971228	1.01463	2.77202	2.23285	2.75403	1	0.523486	0.492001	0.535113	1.04836	1.02801	1.13867	2.79768	2.7107	2.54227	1	0.599476	0.690752	0.72333	1.00039	1.05524	1.07192	2.07581	1.63166	2.80133	1
DHX38	0.579641	0.576655	0.599699	1.14029	1.17376	1.28408	1.35704	1.53828	1.68912	1	0.714216	0.619695	0.73251	1.36918	1.36284	1.43199	1.76445	1.65453	1.58468	1	0.601581	0.627879	0.674743	1.47653	1.46957	1.52109	1.74351	1.63392	2.06559	1
DHX40	0.771824	0.714316	0.763512	1.61895	1.71221	1.68533	1.29687	1.32447	1.28721	1	0.664701	0.583789	0.694539	1.45211	1.64604	1.53348	1.42334	1.54691	1.08174	1	0.747603	0.739211	0.720672	1.76911	1.65627	1.80076	1.24412	1.08824	1.31407	1
DHX57	1.49774	1.4156	1.48068	0.7794	0.797785	0.779059	0.767571	0.610501	0.688323	1	1.57577	1.58564	1.46401	0.956714	0.929616	0.810589	0.933234	0.869892	0.922808	1	1.40052	1.55366	1.66909	0.766183	0.818765	0.634645	0.742502	0.864793	0.972231	1
DHX8	0.307702	0.285445	0.293555	0.944049	0.983021	1.17356	3.16199	2.97289	3.72813	1	0.371076	0.333237	0.400209	1.00064	0.967739	1.10769	3.75662	3.23267	3.17816	1	0.399736	0.436304	0.473483	1.07204	1.22866	1.10035	3.20131	2.71392	4.84778	1
DHX9	0.378933	0.379587	0.384855	0.82169	0.858947	1.02326	3.07655	3.21054	4.11067	1	0.360813	0.349621	0.342147	0.704943	0.697205	0.805136	4.35826	4.08605	4.04053	1	0.436035	0.447988	0.424638	0.711424	0.811801	0.787269	3.77094	3.10707	5.10868	1
DIABLO	0.43616	0.389138	0.428211	1.89601	1.86894	1.93143	0.97253	0.950461	0.81685	1	0.401997	0.358857	0.372335	2.04636	1.98242	2.25168	0.914461	0.893387	0.815939	1	0.497653	0.491738	0.525763	1.84463	1.81958	1.96604	1.02054	1.07681	0.990278	1
DIAPH1	1.75383	1.74201	1.73671	0.68794	0.671588	0.570528	0.536483	0.590473	0.589352	1	1.67378	1.72622	1.6579	0.636802	0.649826	0.537205	0.541393	0.530398	0.58468	1	1.67114	1.66693	1.68411	0.587765	0.53534	0.453827	0.467961	0.502104	0.487822	1
DIAPH2	1.51227	1.45313	1.50465	0.750317	0.730741	0.731916	0.817007	0.798232	0.958228	1	1.64555	1.75714	1.65815	0.882711	0.864634	0.678353	0.696008	0.597884	0.92919	1	1.4659	1.39596	1.57656	0.781	0.858141	0.711185	0.664051	0.737296	0.424888	1
DICER1	1.19888	1.25077	1.2331	1.88512	1.87245	2.00313	0.826106	1.06757	0.689498	1	1.33192	1.4498	1.42015	0.941673	1.02522	0.907925	0.509551	0.733905	0.565937	1	1.17331	1.0781	1.22782	1.05321	1.27233	0.935359	0.884578	0.812973	1.03956	1
DIDO1	0.286313	0.284401	0.286283	0.621925	0.692295	0.718783	3.44331	3.87867	4.80627	1	0.302627	0.292143	0.294898	0.753595	0.756222	0.830626	4.68486	4.1377	3.95905	1	0.334323	0.34796	0.340958	0.927997	0.970379	0.995024	3.94922	3.27913	4.28477	1
DIEXF	0.346118	0.381659	0.405149	0.832296	0.824497	0.866752	3.35651	2.38543	2.95874	1	0.64994	0.617771	0.598175	1.21242	1.14426	1.37699	2.98896	2.51447	2.90254	1	0.494245	0.561815	0.568803	1.17356	1.19342	1.27657	2.37518	2.19591	3.21924	1
DIMT1	0.574723	0.548503	0.57022	1.09002	1.0861	1.28975	2.59959	2.56507	3.18582	1	0.559484	0.556328	0.58391	1.05756	1.01657	1.16445	2.70222	2.78612	2.51742	1	0.595089	0.584617	0.618557	1.11165	1.18892	1.19128	2.46549	2.18152	2.8663	1
DIP2A	1.65646	1.73345	1.47261	0.898054	0.867817	0.793191	0.648539	0.926433	0.829757	1	1.35265	1.41087	1.30525	1.09502	1.02783	1.06472	1.06983	1.1858	0.886769	1	1.23417	1.36461	1.4292	1.10728	0.989346	1.03765	0.756292	0.828806	0.792765	1
DIP2B	1.36271	1.33839	1.29168	0.678399	0.711552	0.716422	0.556186	0.671159	0.802757	1	1.38748	1.39565	1.39467	0.732377	0.827082	0.769131	0.695878	0.771184	0.833049	1	1.58592	1.57197	1.63893	1.15556	1.02695	0.885245	0.584871	0.802755	1.00565	1
DIS3	0.811584	0.767483	0.748932	1.45316	1.36066	1.57272	0.977593	1.00982	0.885308	1	0.918883	0.794889	0.859827	1.52102	1.50644	1.59446	0.98512	1.11367	0.964813	1	0.742694	0.83113	0.851786	1.58607	1.60929	1.63201	0.985334	0.99694	0.913517	1
DIS3L	1.21852	1.16555	1.09553	0.883409	0.997311	1.10509	0.65354	0.833373	0.725593	1	1.16333	1.26818	1.26992	0.883568	0.816789	0.87291	0.5382	0.701875	0.583728	1	1.29577	1.2315	1.29998	0.968395	1.01336	0.998092	0.717084	0.812756	0.651244	1
DIS3L2	1.4616	1.45923	1.42898	0.803773	0.754978	0.683322	0.702383	0.725876	0.792392	1	1.80187	1.79075	1.72694	0.725804	0.702865	0.562165	0.467997	0.530258	0.721476	1	1.73061	1.65952	1.90935	0.722113	0.696773	0.533437	0.617952	0.481799	0.692704	1
DKC1	0.355996	0.371424	0.372769	0.518745	0.538258	0.523935	4.00137	3.95858	5.41883	1	0.286324	0.283373	0.290444	0.544456	0.549512	0.554894	4.92453	4.22582	4.29102	1	0.373249	0.391605	0.373633	0.568298	0.587129	0.593512	4.08959	3.69636	5.95781	1
DLAT	0.462163	0.507376	0.468778	2.02654	1.91348	2.22927	0.964021	1.03989	0.850357	1	0.358517	0.338758	0.349723	1.98118	1.86593	2.19361	0.798177	0.895118	0.701801	1	0.507013	0.54431	0.511173	1.91896	2.05209	2.23699	1.11799	1.14545	0.904649	1
DLD	0.316522	0.323462	0.317902	2.29494	2.18867	2.0734	1.15771	1.01307	0.80294	1	0.30481	0.293929	0.309286	2.33962	2.27025	2.60735	0.80136	0.95343	0.586334	1	0.357842	0.322666	0.33108	2.106	2.04441	2.39282	0.859226	0.938424	0.580474	1
DLG1	0.480202	0.452512	0.514126	1.53515	1.33914	1.6535	1.27694	1.63581	1.67134	1	0.494725	0.452402	0.458463	1.49516	1.37975	1.63106	1.72942	1.57574	1.4786	1	0.586172	0.605238	0.637067	1.69678	1.56513	1.70448	1.39641	1.32495	1.15602	1
DLG3	0.408707	0.454252	0.423185	1.79367	1.60276	1.57905	0.922642	0.921422	1.01283	1	0.495069	0.414785	0.455479	2.19684	1.93571	2.48874	1.18389	1.44742	1.05517	1	0.527979	0.478724	0.593282	1.94704	1.74697	2.2387	1.2011	1.21764	0.929237	1
DLGAP4	1.89502	1.83903	1.81974	0.677123	0.618671	0.557555	0.410248	0.482206	0.446437	1	1.92484	1.83923	1.76532	0.728572	0.740193	0.561685	0.365004	0.418484	0.463817	1	1.42095	1.4774	1.49855	0.586988	0.56349	0.504823	0.452688	0.485248	0.588152	1
DLST	0.348461	0.378537	0.387024	2.27476	2.19455	2.30396	1.23554	1.12537	0.901365	1	0.326178	0.333123	0.334278	2.33201	2.13276	2.67829	0.797432	0.97963	0.576932	1	0.354318	0.351185	0.367889	2.18914	2.07797	2.55401	0.936337	0.997176	0.62549	1
DMAP1	0.322115	0.314911	0.306024	0.54663	0.480285	0.508107	3.0117	4.33324	5.31153	1	0.355335	0.366241	0.354646	0.531002	0.568503	0.557953	5.7696	4.64684	4.82377	1	0.313022	0.354319	0.3166	0.568096	0.623031	0.612995	4.36117	3.76981	5.72461	1
DMTN	1.17375	1.16115	1.13083	1.31062	1.35882	1.32976	2.46286	3.29883	3.88861	1	0.696899	0.76271	0.919738	0.817144	0.927279	0.837787	1.16475	1.35519	1.6123	1	0.763751	0.792153	0.763166	0.684574	0.759772	0.841857	1.68242	1.45708	1.37949	1
DMXL1	0.901546	0.968956	0.922301	1.35845	1.28118	1.45686	0.700965	0.770332	0.62965	1	0.98466	1.09188	1.01713	1.21522	1.21135	1.28191	1.04596	1.00214	0.769491	1	0.91578	0.883573	1.05095	1.25594	1.3485	1.2968	0.788739	0.867306	1.22432	1
DNAAF5	1.55449	1.64752	1.52238	0.852288	0.803881	0.736643	0.57426	0.548187	0.609502	1	1.85943	1.87258	1.703	0.954206	1.01935	0.897382	0.579707	0.845491	0.626421	1	1.40575	1.4252	1.45666	0.865672	0.800893	0.736801	0.498844	0.684363	0.441327	1
DNAJA1	0.974425	1.03089	1.02804	1.20099	1.14468	1.21862	0.878181	1.13049	1.24234	1	1.17214	1.24272	1.26927	1.3526	1.22694	1.21041	0.841102	0.877423	0.734379	1	1.05633	1.02086	1.02602	1.22977	1.26473	1.30549	0.966718	1.00189	0.846652	1
DNAJA2	1.07211	1.09302	1.14401	1.10673	0.991509	1.06652	0.646858	0.707655	0.670415	1	1.11234	1.15238	1.28511	1.21519	1.137	1.09587	0.658839	0.751399	0.604989	1	1.13937	1.07612	1.08654	1.22799	1.30154	1.26331	0.965963	0.938995	0.864693	1
DNAJA3	0.115798	0.13659	0.154496	1.44389	1.42624	1.62939	1.85013	2.8104	3.16947	1	0.200167	0.212617	0.212628	1.34708	1.26132	1.26311	2.36666	2.38528	2.01635	1	0.376433	0.402507	0.428725	1.41449	1.54203	1.79433	2.11456	1.96121	2.04809	1
DNAJA4	1.2203	1.32482	1.29856	1.00116	1.07494	1.04227	0.790422	0.635784	0.68603	1	1.24286	1.37452	1.27616	1.02589	1.00383	0.903652	1.04482	0.90665	0.949148	1	1.24073	1.16414	1.35036	1.07864	1.15599	1.06245	0.677921	0.742126	0.622069	1
DNAJB1	1.34649	1.35396	1.3897	1.07175	1.05502	1.06385	0.745135	0.809593	0.691343	1	1.20772	1.27754	1.23315	1.03937	1.05107	1.02814	0.715726	0.791394	0.816637	1	1.27592	1.29269	1.30815	0.996687	0.955819	0.982538	0.783739	0.721665	0.672013	1
DNAJB11	0.517387	0.592082	0.553539	1.71008	1.61678	1.7961	1.01233	0.891954	0.945768	1	0.405215	0.439788	0.351566	1.79079	1.81671	1.98185	0.592981	0.748161	0.647681	1	0.241997	0.27682	0.295834	2.61379	2.74264	3.1586	0.904374	1.02674	0.452777	1
DNAJB12	0.36726	0.406041	0.386468	1.60651	1.41395	1.48048	1.85189	1.29629	1.20903	1	0.394208	0.445203	0.553323	1.67938	1.48054	1.67607	1.07879	1.11313	1.04193	1	0.466238	0.462813	0.519563	1.63183	1.54612	1.94046	1.25734	1.43925	1.35632	1
DNAJB14	0.535837	0.5223	0.417967	1.40029	1.5433	1.43962	1.09529	0.867805	0.897546	1	0.492123	0.537368	0.543785	1.36315	1.27352	1.62585	0.916354	1.18471	1.01454	1	0.772289	0.813411	0.683696	1.59899	1.74941	1.88143	1.04939	1.175	0.880382	1
DNAJB2	1.08096	1.09089	0.9925	1.26079	1.17167	1.31476	0.919228	1.01479	0.88244	1	1.2071	1.22407	1.20841	1.22332	1.13685	1.15164	0.498149	0.548756	0.366319	1	1.04047	1.03462	1.17497	1.33309	1.27426	1.26184	0.586698	0.814243	0.505868	1
DNAJB6	0.862041	0.932109	1.04327	0.877287	0.941631	0.959331	1.03746	1.29698	1.42123	1	0.96618	0.916929	1.00954	1.10876	0.997531	1.09484	1.74266	1.80643	1.70482	1	1.01074	0.96458	1.25054	1.09181	1.10817	0.957324	1.34169	1.44571	1.44919	1
DNAJB9	0.378475	0.42271	0.353989	1.54927	1.30072	1.70806	1.73529	1.89877	1.84107	1	0.596406	0.613627	0.602366	1.88947	1.61422	1.97796	3.09083	2.57402	3.1694	1	0.466842	0.418307	0.418649	1.28495	1.36413	1.41847	1.78721	1.82096	2.13933	1
DNAJC1	0.692214	0.668635	0.617005	1.59384	1.55531	1.79972	0.976135	0.957986	0.813898	1	0.424553	0.446707	0.455522	2.36376	2.25248	2.46628	1.15771	1.36126	0.965204	1	0.539071	0.473028	0.470531	2.17292	2.57211	2.5298	1.16266	1.05752	0.841715	1
DNAJC10	0.900059	0.858316	0.729626	0.880078	0.887722	1.06961	1.20658	1.34136	1.44272	1	0.831547	0.936678	0.932034	1.23366	1.17139	1.24678	1.94493	1.55169	1.6067	1	0.865145	0.908426	0.769922	1.08365	1.32544	1.1168	1.45695	1.1565	1.93592	1
DNAJC11	0.316057	0.324817	0.334821	1.68482	1.53496	1.77795	1.08597	1.05048	0.97461	1	0.565166	0.569882	0.547437	1.67408	1.60596	1.99124	1.09415	1.34956	0.914343	1	0.419419	0.5063	0.411265	2.02538	2.38469	2.56521	1.4182	1.30577	1.31208	1
DNAJC13	0.640071	0.631303	0.59019	1.49306	1.45948	1.82286	1.67434	1.36206	1.31168	1	0.617882	0.604616	0.533938	1.55133	1.49288	1.74189	1.81291	1.59775	1.54349	1	0.722564	0.740041	0.659383	1.46168	1.62139	1.63564	1.53979	1.47045	2.05123	1
DNAJC17	1.02639	1.04542	0.971319	1.09232	1.10182	1.21314	1.01451	1.16388	1.42261	1	0.966634	0.958776	0.930156	1.14747	1.29382	1.29523	1.23425	1.5005	1.13912	1	0.989528	1.07087	1.07505	1.19794	1.15191	1.17169	1.04019	1.01443	0.986936	1
DNAJC19	0.410472	0.477612	0.467365	1.82138	1.74607	1.81643	1.09356	1.14462	1.02055	1	0.361826	0.408467	0.364377	1.85596	1.6679	1.90723	0.758368	0.965544	0.717096	1	0.386277	0.461172	0.409565	1.88381	1.91984	2.15762	1.05485	1.16174	0.900664	1
DNAJC2	1.43539	1.54628	1.45963	0.825841	0.801	0.762983	0.909024	0.788526	0.909774	1	1.41593	1.41703	1.42178	0.697879	0.760906	0.635982	0.565197	0.635362	0.674315	1	1.57424	1.66292	1.50364	0.784184	0.743949	0.613729	0.529041	0.650351	0.583626	1
DNAJC21	1.47842	1.42952	1.44555	0.774674	0.835166	0.876382	0.840303	0.848559	1.04451	1	1.56942	1.3985	1.58102	0.881192	0.901987	0.876116	0.981229	0.951366	0.902488	1	1.34405	1.37815	1.4518	0.85944	0.850635	0.860528	0.957126	0.888875	0.994327	1
DNAJC3	0.369499	0.394366	0.387996	2.26885	2.22664	2.36919	1.11643	1.01142	0.69971	1	0.414979	0.380567	0.393352	2.3936	2.21938	2.43257	0.802042	0.821462	2.03462	1	0.287309	0.290416	0.316197	2.24854	2.25117	2.56347	0.890188	0.955731	0.624652	1
DNAJC30	0.621917	0.66683	0.642209	1.57996	1.53824	1.82628	1.21885	1.33825	1.45285	1	0.176627	0.145119	0.206012	2.75782	2.61173	2.96704	1.09795	1.18505	1.66768	1	0.278477	0.184554	0.187541	2.19004	2.23408	1.69689	1.31166	1.09362	2.02101	1
DNAJC5	0.334438	0.295203	0.341464	2.1801	1.70426	2.13687	0.897346	1.07103	0.513408	1	0.316163	0.286742	0.396549	1.93639	1.70709	2.44323	0.536484	0.771665	0.418876	1	0.535711	0.493992	0.652169	2.22657	2.46272	2.64812	0.931689	0.978506	0.942476	1
DNAJC7	1.16683	1.16491	1.11158	1.20235	1.19324	1.32326	0.60219	0.688091	0.582131	1	1.1287	1.11033	1.13855	1.45959	1.3424	1.46308	0.579216	0.715206	0.569572	1	1.1296	1.0815	1.08956	1.20017	1.25322	1.19989	0.7567	0.717851	0.608408	1
DNAJC8	1.16671	1.15599	1.1386	1.16289	1.20066	1.1084	0.807286	0.907693	0.998916	1	1.23706	1.18147	1.1811	1.2326	1.35471	1.34868	0.848068	0.869372	0.733386	1	1.18075	1.17484	1.13451	1.1678	1.13023	1.22852	0.712761	0.716365	0.610577	1
DNAJC9	1.30228	1.34326	1.32654	0.890923	0.92516	0.87029	0.576234	0.611877	0.560538	1	1.46488	1.40345	1.44502	1.0186	1.07897	1.03845	0.631191	0.689354	0.554796	1	1.43366	1.43917	1.41547	0.9482	0.868155	0.957632	0.621125	0.661213	0.621028	1
DNAL1	1.36631	1.3824	1.38985	0.974273	1.02087	0.726981	1.29214	1.05258	0.970814	1	1.45906	1.36156	1.51534	0.939132	1.17362	0.872014	1.21636	1.28146	2.23696	1	1.52277	1.23395	1.40821	0.942413	1.07917	0.836852	1.05268	0.874747	1.52947	1
DNASE2	1.22025	1.3295	1.27126	1.04867	1.01381	1.0504	0.717751	0.698949	0.660161	1	1.27256	1.34639	1.15401	1.25674	1.19361	1.35714	0.566538	0.724406	0.587558	1	1.43087	1.50002	1.43426	1.17764	1.06306	1.23956	0.758591	0.717699	0.567977	1
DNLZ	0.60447	0.586942	0.594784	1.99986	1.91926	1.89969	0.926224	1.13167	0.729792	1	0.221297	0.227987	0.244526	2.16607	2.07031	2.52954	0.541563	0.720142	0.377929	1	0.469542	0.456114	0.436819	2.36681	2.07746	2.47081	0.793329	0.945641	0.613099	1
DNM1	1.82227	1.80046	1.81752	0.602954	0.622754	0.666092	0.43508	0.598381	0.544595	1	1.70037	1.68159	1.58845	0.723433	0.727124	0.553712	0.467283	0.56236	0.816279	1	1.81986	1.7171	1.75379	0.522795	0.595575	0.459508	0.532301	0.703223	0.469102	1
DNM1L	1.66735	1.60052	1.67656	0.718316	0.690413	0.64908	0.539522	0.662477	0.749883	1	1.75546	1.73255	1.76207	0.661058	0.71306	0.551502	0.54136	0.571968	0.630511	1	1.52424	1.53277	1.54314	0.663914	0.641857	0.599062	0.665689	0.73171	0.825648	1
DNM2	1.68466	1.74229	1.71307	0.651422	0.636785	0.581238	0.486491	0.511524	0.463492	1	1.80289	1.77914	1.74862	0.653842	0.645209	0.534232	0.398768	0.457267	0.483979	1	1.68633	1.72205	1.72947	0.659584	0.644319	0.531099	0.607039	0.65809	0.684678	1
DNMT1	0.49296	0.468181	0.505864	0.676598	0.689744	0.699557	2.75705	3.16347	4.21528	1	0.525953	0.48397	0.548661	0.769775	0.851599	0.882711	4.19398	3.87002	3.69124	1	0.552083	0.592808	0.581214	0.888492	0.916265	0.972573	2.88485	2.70181	4.01529	1
DNMT3A	1.14513	1.18907	1.14154	0.674751	0.879858	0.937794	2.11504	1.9436	2.52783	1	0.820861	0.951349	0.796195	1.02092	1.08406	1.05239	2.89312	2.15907	2.24619	1	0.822364	0.745132	0.567068	0.75307	0.798239	0.793191	1.72065	1.30142	2.34152	1
DNPEP	1.0639	1.16544	1.11769	1.10168	1.02802	1.02827	0.786079	0.833963	0.753192	1	1.13212	1.1455	1.12798	1.10245	1.14418	1.13115	0.726095	0.726976	0.862874	1	1.19431	1.20435	1.22873	1.21439	1.10842	1.12404	0.806426	0.887363	0.902924	1
DNPH1	1.66885	1.69371	1.63806	0.675849	0.691347	0.572736	0.544885	0.49432	0.589363	1	1.54322	1.734	1.43325	0.676916	0.70425	0.682692	0.845507	0.882801	0.980426	1	1.62679	1.94594	1.41468	0.664294	0.506898	0.425622	0.344572	0.481599	0.425504	1
DNTTIP1	0.544767	0.544485	0.625422	0.547807	0.564714	0.619976	2.98331	3.95524	4.68774	1	0.468197	0.510048	0.541075	0.565174	0.645885	0.715175	4.62235	4.00948	4.06883	1	0.405515	0.359451	0.41016	0.785371	0.922328	1.02303	4.11194	3.25358	4.18045	1
DNTTIP2	0.473202	0.44506	0.477122	0.517134	0.569291	0.561748	3.10658	2.83451	3.64448	1	0.38101	0.369857	0.427532	0.606518	0.594042	0.64963	4.56395	3.77233	3.46996	1	0.454398	0.406394	0.420389	0.62672	0.653408	0.636287	4.43671	3.86196	6.33385	1
DOCK10	0.714682	0.730472	0.757617	1.4582	1.30225	1.50564	1.73441	1.55954	1.8505	1	0.621025	0.634919	0.637272	1.33292	1.22416	1.46615	1.55512	1.4845	1.44516	1	0.64356	0.657453	0.671614	1.59628	1.70725	1.75401	1.37637	1.35183	1.65004	1
DOCK11	0.663961	0.690404	0.715987	1.16098	1.09549	1.28628	2.05393	1.85166	2.03663	1	0.690691	0.723543	0.725297	1.13903	1.07969	1.19363	2.00122	1.80273	1.89407	1	0.636555	0.678369	0.678283	1.46149	1.53797	1.5431	1.83317	1.63648	2.27973	1
DOCK2	1.36116	1.34675	1.38183	0.831587	0.802496	0.848783	0.978152	0.908012	0.9805	1	1.40592	1.47926	1.45111	0.974009	0.918246	0.882156	1.01033	0.960743	1.11662	1	1.31037	1.31135	1.31115	0.877441	0.973125	0.86919	0.918387	0.998563	1.06655	1
DOCK5	1.65525	1.4296	1.89195	0.657109	0.743096	0.642198	0.903784	0.905917	0.823216	1	1.22202	1.55986	1.32922	0.824577	0.813756	0.660154	0.63913	0.807891	1.63716	1	1.1016	1.42999	1.50122	0.889949	0.980898	0.668306	0.974518	1.26387	1.1826	1
DOCK7	0.662206	0.655712	0.579701	1.42372	1.09166	1.37169	0.845851	0.847256	1.06542	1	0.802411	0.836973	0.795948	1.13744	1.06975	1.20596	3.16354	2.65977	2.66653	1	0.908985	0.89628	0.862385	1.08156	1.25649	1.21058	1.85575	1.51962	2.10372	1
DOCK8	0.631385	0.645394	0.676403	1.08527	1.02241	1.14856	2.42546	2.15619	2.50016	1	0.639539	0.654188	0.627633	1.05918	0.963226	1.13738	2.84913	2.48365	2.47223	1	0.67047	0.647574	0.637796	1.1876	1.38626	1.33534	2.22035	1.8787	2.68451	1
DOCK9	0.521439	0.577449	0.567626	1.09396	1.0808	1.27702	2.57076	2.01656	2.40481	1	0.590942	0.649813	0.625312	1.05909	1.02069	1.11407	2.34832	2.14194	2.49963	1	0.592457	0.611432	0.636515	1.30457	1.37454	1.37771	2.2101	1.99007	3.01191	1
DOHH	1.34814	1.43521	1.28475	0.616982	0.683592	0.634593	1.10681	0.822085	0.660486	1	1.24992	1.37969	1.26601	0.778258	0.753786	0.804369	1.17068	0.864715	1.45785	1	1.14885	1.21565	1.22463	0.677724	0.675779	0.711134	0.611134	0.663545	0.895527	1
DOK1	1.54303	1.55588	1.4372	0.800412	0.945515	0.858316	1.52845	0.647747	0.587857	1	1.79494	1.76355	1.53098	0.906131	0.890591	0.727355	0.616877	0.645686	0.406337	1	1.49072	1.40502	1.3532	0.786161	0.755327	0.71577	0.401894	0.537909	0.506505	1
DOK2	1.54563	1.53393	1.58436	0.778988	0.749563	0.749405	0.755279	0.694153	0.814976	1	1.55218	1.53694	1.6751	0.75811	0.759843	0.676516	0.711304	0.737345	0.610657	1	1.58215	1.60644	1.75521	0.817777	0.802408	0.723402	0.651943	0.680725	0.803622	1
DOLPP1	0.282194	0.338315	0.243896	2.42999	1.66684	2.67191	1.33341	1.65625	1.32924	1	0.193516	0.302033	0.185503	1.41947	0.730098	1.92557	0.942139	1.4736	0.740198	1	0.113991	0.166633	0.116914	0.904256	0.486799	1.32769	2.12645	4.36499	3.19716	1
DOPEY2	1.69904	1.66236	1.60602	0.755859	0.743394	0.59773	0.644103	0.693704	0.558917	1	1.71717	1.77419	1.70888	0.765148	0.797338	0.729159	0.569641	0.693561	1.06481	1	1.72692	1.67468	1.53849	0.653765	0.481327	0.404577	0.486222	0.584299	0.460077	1
DPAGT1	0.487557	0.427055	0.440888	1.65635	1.57939	1.9153	1.04233	1.40145	1.53609	1	0.52755	0.34778	0.516525	2.0524	2.22569	2.15545	0.867022	0.894489	1.0663	1	0.578575	0.566885	0.512359	1.56079	1.81935	2.07716	0.686233	1.08502	0.493489	1
DPF2	0.37829	0.361381	0.356081	1.29759	1.43659	1.56476	1.60396	1.9847	2.23449	1	0.402219	0.343727	0.377245	1.4555	1.58357	1.89792	2.62138	2.32164	1.96605	1	0.331377	0.394068	0.392105	1.79073	1.84991	1.93797	1.83396	1.54583	1.71272	1
DPH2	1.18695	1.22912	1.29377	0.656256	0.699155	0.664172	0.658339	0.960451	1.10551	1	1.66371	1.60219	1.65941	0.622603	0.70048	0.587825	0.323628	0.509538	0.891668	1	1.64251	1.67667	1.77149	0.625384	0.589376	0.48146	0.339546	0.340358	0.303774	1
DPH5	1.43934	1.49349	1.37916	0.710575	0.662883	0.537117	0.962145	0.74288	0.662279	1	1.5852	1.54586	1.3754	0.806369	0.78882	0.67197	0.757972	0.534674	0.687329	1	1.36765	1.50653	1.67333	0.87353	0.821611	0.741994	0.533941	0.578151	0.680427	1
DPH6	1.87426	1.81913	1.83622	0.59038	0.600373	0.485499	0.277844	0.465077	0.411472	1	1.93074	1.95714	1.71121	0.578088	0.584228	0.389847	0.384895	0.466671	1.06128	1	1.90829	1.87056	1.92947	0.693628	0.623755	0.466731	0.452157	0.554978	0.574298	1
DPM1	0.297656	0.286553	0.378502	1.81235	1.85503	1.86196	0.995041	1.15174	0.862081	1	0.267617	0.220916	0.233215	2.35816	1.965	2.43393	1.22112	1.19434	1.01469	1	0.351356	0.398758	0.390103	2.03965	1.90191	2.29252	1.23144	1.43482	1.14512	1
DPM3	0.399578	0.379165	0.372438	1.97172	1.63619	2.71915	0.781263	1.2164	0.66836	1	0.22601	0.217465	0.2505	2.45329	2.1024	2.7432	0.556102	0.895316	0.524507	1	0.459459	0.550547	0.442924	1.74791	2.03455	1.95885	1.04535	0.929447	0.754721	1
DPP3	1.6608	1.62054	1.63795	0.744322	0.755232	0.639924	0.619476	0.560232	0.590472	1	1.66034	1.67257	1.64181	0.632049	0.676133	0.520624	0.400693	0.437753	0.596849	1	1.79942	1.97219	1.90372	0.688197	0.603284	0.510292	0.455939	0.513524	0.418945	1
DPP4	0.615188	0.598199	0.630552	1.86501	1.72087	1.75798	1.13373	1.21837	1.04789	1	0.633411	0.636013	0.660564	1.95807	1.78527	2.03056	1.16319	1.2532	1.17861	1	0.650741	0.665272	0.676477	1.58636	1.54046	1.7632	1.03973	1.01571	0.954294	1
DPP7	1.3054	1.25767	1.203	0.762847	0.734371	0.768191	0.586881	0.636607	0.578373	1	1.81352	1.81806	1.79739	1.29062	1.24109	1.39704	0.754159	0.660511	0.831151	1	1.40876	1.5372	1.40718	1.08234	1.12257	1.22928	0.678317	0.80532	0.866512	1
DPP8	1.74241	1.64798	1.70086	0.812349	0.739541	0.713228	0.488842	0.512859	0.68109	1	1.12892	1.11097	1.10554	0.688098	0.779552	0.715081	0.76674	0.608507	0.987666	1	1.4237	1.50069	1.32734	0.728509	0.705949	0.664382	0.706917	0.537774	0.570064	1
DPP9	1.5761	1.60456	1.71164	0.673323	0.653178	0.550697	0.573456	0.566062	0.625373	1	1.50202	1.48877	1.51344	0.793816	0.777081	0.646128	0.54594	0.606006	0.568764	1	1.53456	1.66527	1.64231	0.813793	0.793002	0.740587	0.577378	0.620532	0.706446	1
DPY19L1	0.383363	0.361638	0.378059	2.16338	1.94475	2.32911	1.62832	1.48012	1.15337	1	0.489649	0.534579	0.409923	2.63445	2.50135	2.97382	1.20078	1.55116	1.20837	1	0.367627	0.317522	0.34291	1.83579	1.84043	2.30662	1.48912	1.33851	1.28392	1
DPY19L3	0.487476	0.392232	0.463847	1.97248	2.15428	2.01695	2.06727	1.04436	1.69406	1	0.253859	0.30714	0.253959	1.72369	1.20002	2.21347	0.402216	0.607588	0.222495	1	0.727885	0.446104	0.742265	1.68034	1.62821	1.86322	1.40719	1.11221	1.50883	1
DPY30	0.653119	0.737805	0.708199	1.24026	1.21828	1.28582	1.64119	2.36345	2.85733	1	0.604306	0.666244	0.735166	1.19119	1.3156	1.25786	2.30575	2.23367	2.16648	1	0.779455	0.733651	0.811141	1.08245	1.2528	1.26442	2.2278	1.83458	2.24127	1
DPYD	1.6892	1.78606	1.75322	0.634191	0.63773	0.486552	0.505373	0.590354	0.622941	1	1.7071	1.7939	1.73573	0.644312	0.658387	0.50765	0.772462	0.718883	0.717502	1	1.69587	1.71336	1.66875	0.614284	0.536533	0.473742	0.548792	0.5743	0.479194	1
DPYSL2	1.30274	1.32572	1.37856	0.68492	0.669624	0.612656	0.652067	0.551723	0.653364	1	1.58552	1.69422	1.7155	0.729512	0.813379	0.676458	0.591547	0.700314	0.679758	1	1.88591	2.14129	2.1479	0.791885	0.70365	0.550955	0.613289	0.615401	0.630165	1
DR1	0.994698	0.953088	0.959647	1.05637	1.04413	1.03914	0.94379	0.938512	1.02403	1	1.06291	1.01773	1.08447	1.23257	1.40747	1.38896	1.11383	1.13872	0.966085	1	1.07327	1.09963	1.10596	1.2026	1.19911	1.31158	1.02086	1.02379	0.952076	1
DRAM2	0.421997	0.569416	0.314965	1.53956	1.69566	1.86434	1.02258	0.936573	0.780189	1	0.559641	0.497255	0.35746	1.62987	1.88101	1.82	1.07981	0.884462	0.755707	1	0.446813	0.398823	0.214334	1.95089	2.06732	2.51553	0.91229	1.00812	0.745122	1
DRAP1	0.933605	0.952554	0.869119	1.09645	1.09652	1.02293	0.849905	0.858077	0.843016	1	1.03983	1.06593	1.07024	1.15531	1.32478	1.31514	0.942307	0.940565	0.656582	1	1.1279	1.16516	1.11053	1.25544	1.20607	1.34226	0.809763	0.882424	0.859769	1
DRG1	1.48927	1.49992	1.37218	0.78666	0.747177	0.668677	0.669901	0.782456	0.880959	1	1.46466	1.58643	1.50351	0.845905	0.782208	0.750007	0.674501	0.756506	0.744928	1	1.52323	1.52467	1.58911	0.805803	0.772965	0.718788	0.732799	0.742696	0.936393	1
DRG2	1.72256	1.78633	1.84115	0.799903	0.74326	0.65462	0.68133	0.671481	0.736584	1	1.7279	1.74582	1.64427	0.604015	0.628091	0.476246	0.46473	0.493986	0.526138	1	1.65946	1.68155	1.57957	0.644658	0.696913	0.615377	0.503165	0.711732	0.785259	1
DSC1	0.949268	0.729808	0.681463	1.11297	0.818356	0.899124	3.41174	1.72774	3.41833	1	0.546298	0.691472	0.909271	1.03195	0.87001	0.972149	1.4267	2.07577	3.99479	1	0.905307	0.422589	0.479444	0.966967	0.568014	1.18798	1.43856	2.83989	2.52202	1
DSCR3	1.58045	1.67577	1.62729	0.812563	0.792767	0.677298	0.367554	0.478409	0.451697	1	1.52434	1.49055	1.52853	0.674963	0.667155	0.632515	0.236226	0.417177	0.307225	1	1.81329	1.84817	1.85024	0.742522	0.642987	0.599073	0.331632	0.516904	0.369425	1
DSG1	0.842437	0.613488	0.56865	1.18796	0.718962	0.710609	4.47576	2.45206	3.49372	1	0.372143	0.451708	0.792673	0.976121	0.938665	0.97465	2.01464	2.76836	6.55336	1	0.82569	0.601418	0.570773	0.748764	0.533085	1.1492	1.65428	2.23872	3.23679	1
DSN1	0.435751	0.403207	0.414688	1.18771	1.15326	1.2433	2.02396	2.5866	3.03459	1	0.459803	0.366438	0.415038	1.11004	1.10956	1.3935	2.41148	2.32883	2.20622	1	0.570118	0.520924	0.668693	1.43287	1.53037	1.54926	2.65687	2.18918	2.39704	1
DSP	0.75539	0.573896	0.594935	1.36408	0.815573	0.85499	5.35839	2.29325	2.81953	1	0.665249	0.695177	0.860994	1.00752	1.0425	0.888078	2.16238	1.70531	23.2813	1	0.661147	0.488707	0.564181	0.769018	0.523373	1.19213	1.62047	1.86925	3.98116	1
DSTN	1.63714	1.65377	1.62136	0.77151	0.764171	0.663052	0.751051	0.746928	0.952088	1	1.71425	1.68223	1.62396	0.735326	0.791455	0.646646	0.841566	0.770029	0.92064	1	1.64513	1.68139	1.59386	0.721977	0.68944	0.598227	0.732077	0.628246	0.746863	1
DTD1	1.19715	1.29055	1.15507	1.01924	1.08239	1.06971	0.874182	1.25561	1.24176	1	1.23971	1.25124	1.17144	1.13439	1.11449	1.12235	0.676138	0.836895	0.719316	1	1.37453	1.43464	1.34711	1.07804	1.04245	1.08793	0.693995	0.815375	0.492796	1
DTD2	1.58177	1.5048	1.90912	0.99693	1.09042	0.715434	0.716407	0.779574	1.23203	1	0.843818	0.796462	1.18369	1.1166	0.983124	1.02324	1.31027	0.942418	0.68332	1	1.28037	1.22503	1.7327	0.988516	0.951622	0.900067	0.676454	0.830313	0.960538	1
DTNBP1	1.30276	1.34573	1.37636	0.923461	0.857374	0.829139	0.615693	0.681128	0.561668	1	1.22673	1.27488	1.31434	0.988994	0.862287	0.801283	0.465396	0.541522	0.462118	1	1.48018	1.53471	1.57311	0.935257	0.900414	0.783466	0.56003	0.663961	0.476117	1
DTX2	1.32776	1.4263	1.23012	1.01771	0.974225	0.931182	0.915671	1.45424	1.0427	1	1.12103	1.07381	1.0526	1.4224	1.64187	1.63872	0.851298	1.1008	1.06391	1	1.11044	1.22405	1.10626	1.06549	0.983353	0.935458	0.590098	0.518247	0.53927	1
DTX3L	1.08916	1.10714	1.10659	0.970393	0.94335	1.01264	0.936349	1.13681	1.27507	1	1.03282	1.18648	1.14066	1.05653	0.999274	1.0142	1.39808	1.21143	1.24471	1	1.05946	1.07131	1.04289	1.01272	1.08598	1.10046	1.21957	1.06183	1.20617	1
DTYMK	0.699004	0.688321	0.737267	1.67987	1.54033	1.81171	0.785167	0.931059	0.84267	1	0.6245	0.513428	0.670617	1.59064	1.56186	1.71962	0.999619	0.751404	0.708275	1	0.586641	0.567633	0.626512	1.96843	2.0838	2.15819	0.802732	0.908629	0.57969	1
DUS1L	1.26544	1.30246	1.306	1.0308	1.02163	1.07526	0.665126	0.68615	0.541991	1	1.31626	1.24272	1.22296	1.05837	1.29099	1.22717	0.757426	0.752697	0.88826	1	0.983455	1.02339	1.08209	1.04109	1.0491	1.10992	0.583701	0.755494	0.655896	1
DUS2	0.931451	0.901882	0.896303	1.24887	1.05189	1.11901	0.70052	0.623412	0.48789	1	1.01637	1.13514	1.08393	1.12167	1.25042	1.16924	0.760342	0.775506	0.530015	1	1.07569	1.21984	0.939496	1.55152	1.49844	1.66288	0.917499	0.908654	0.530675	1
DUS3L	1.24595	1.15409	1.10419	1.09953	1.08791	1.19318	0.68671	0.843532	0.70914	1	1.1674	1.07408	1.07323	1.04417	1.06075	1.09577	0.881012	1.17958	0.771315	1	1.12379	1.23367	1.28694	1.33434	1.10572	1.17849	0.663187	0.745749	0.663869	1
DUSP11	0.502874	0.501747	0.525589	1.16257	1.14004	1.23572	2.78224	2.49073	2.77191	1	0.480703	0.485642	0.461946	1.13194	1.15182	1.23367	3.23759	2.56564	2.4573	1	0.624214	0.684035	0.667645	0.853087	0.924745	0.859318	2.71145	2.31945	3.60773	1
DUSP12	1.4909	1.51781	1.54848	0.709561	0.682125	0.610082	0.570946	0.723915	0.803856	1	1.91878	1.76144	1.89819	0.694382	0.709847	0.572591	0.583595	0.508953	0.837844	1	1.35241	1.27023	1.4142	0.651266	0.635581	0.544252	1.04737	1.03597	1.41663	1
DUSP14	0.714493	0.718681	0.789462	0.903111	0.872243	0.979242	1.61547	1.33237	1.20163	1	1.02018	0.957244	1.13497	1.01117	1.82913	0.967267	1.08974	0.895013	2.69578	1	1.12312	0.873497	0.975333	1.07669	1.1702	1.28422	0.846835	0.865956	1.5321	1
DUSP23	1.43513	1.41072	1.45246	0.926932	0.974655	1.08951	0.84194	0.843475	1.18806	1	1.53381	1.57811	1.5835	0.92001	0.927624	0.816031	0.945074	0.986625	0.929141	1	1.37608	1.53353	1.47355	0.916954	0.711002	0.79477	0.725397	0.58176	0.812006	1
DUSP3	1.86681	1.8937	1.71952	0.759987	0.67581	0.577011	0.522224	0.391952	0.37763	1	1.80212	1.82974	1.83825	0.6155	0.637341	0.464552	0.253197	0.336571	0.412005	1	1.58722	1.77463	1.72909	0.686917	0.621292	0.565262	0.498431	0.574313	0.48794	1
DUT	0.397841	0.471481	0.43479	2.10317	2.06303	1.98418	1.21148	1.05769	0.951894	1	0.409975	0.390269	0.425258	2.31079	2.04513	2.38967	0.880248	0.939703	0.718274	1	0.63647	0.530209	0.490568	1.7561	1.54369	1.85955	1.07492	1.13837	0.900505	1
DVL2	1.21908	1.19882	1.22071	1.02966	1.04152	1.18114	0.820174	0.937585	1.16734	1	0.874877	1.08537	1.12185	1.27112	1.15608	1.22183	1.04574	0.933547	0.89803	1	1.19814	1.02469	1.34154	0.968886	1.21459	0.967581	0.954384	0.891738	0.829345	1
DYM	1.11316	1.02344	1.03666	0.948802	1.09684	1.07946	0.735164	0.791665	0.722982	1	1.12143	1.0993	1.0436	0.81732	0.92021	0.833546	0.503159	0.486249	0.600805	1	1.05682	1.17119	1.02374	1.28285	1.38342	1.42689	1.18594	1.17807	1.44831	1
DYNC1H1	1.60936	1.62776	1.60841	0.704686	0.685516	0.615982	0.784181	0.701388	0.737475	1	1.69389	1.7748	1.64271	0.669	0.686636	0.561144	0.696273	0.690366	0.847878	1	1.63819	1.67565	1.65224	0.641209	0.606319	0.501853	0.707674	0.729775	0.847239	1
DYNC1I2	1.65731	1.6466	1.58679	0.74089	0.739836	0.684329	0.640988	0.772416	0.797484	1	1.71505	1.75802	1.70369	0.682781	0.750296	0.618724	0.608438	0.646147	0.68812	1	1.67871	1.67926	1.68187	0.587005	0.57336	0.472358	0.576413	0.614298	0.685476	1
DYNC1LI1	1.70364	1.7302	1.74185	0.693231	0.671565	0.578301	0.695049	0.683025	0.673015	1	1.74145	1.6886	1.62632	0.67718	0.728865	0.529469	0.776724	0.647042	0.826368	1	1.74255	1.75551	1.73862	0.646774	0.558394	0.512422	0.701292	0.640076	0.68006	1
DYNC1LI2	1.54202	1.69695	1.7381	0.632491	0.617096	0.46243	0.65497	0.543789	0.644364	1	1.6364	1.69939	1.58725	0.775503	0.733416	0.690469	0.67708	0.766018	0.767683	1	1.5656	1.56846	1.4683	0.764378	0.801418	0.730364	0.698779	0.62695	0.650665	1
DYNLL1	1.02599	1.09629	1.02989	1.12921	1.11855	1.09571	1.98725	1.96069	2.16572	1	0.972283	0.960384	0.914633	1.00632	0.927025	1.0766	1.89149	1.79984	1.65361	1	0.997375	1.07109	1.02429	1.07654	1.02687	1.03024	1.65329	1.43944	1.9529	1
DYNLL2	1.03363	1.01878	1.0485	0.90859	0.936516	0.890277	1.57215	1.6551	1.84189	1	0.960545	1.00919	1.04253	1.01057	1.00608	0.981791	1.92522	1.77304	1.61252	1	1.10854	1.09867	1.1114	0.984948	0.912691	0.932049	1.65742	1.48844	1.87544	1
DYNLRB1	1.47368	1.4966	1.67098	1.0336	0.986782	0.712544	0.758603	0.715846	0.768778	1	1.85417	1.75398	1.76713	0.593794	0.541225	0.55886	0.515101	0.529362	1.11515	1	2.02609	1.95852	2.03688	0.694065	0.458116	0.38229	0.48245	0.526432	0.467224	1
DYNLT1	2.21421	1.778	1.87081	0.672157	0.710106	0.794327	1.75875	1.05878	1.72172	1	2.02638	2.27214	1.7156	0.41133	0.573511	0.482979	1.18646	1.02677	2.57572	1	1.71857	1.9269	2.24109	0.66448	0.562357	0.600548	1.27489	0.398321	1.22855	1
DYNLT3	1.16583	1.2343	1.38285	0.790102	0.73715	0.771523	0.809762	0.817452	0.977047	1	1.56144	1.59382	1.58093	0.785879	0.851879	0.811769	0.813215	1.17283	0.743168	1	1.44029	1.69387	1.54358	0.642442	0.643625	0.635537	0.448798	0.496504	0.310823	1
DYRK1A	0.991616	0.960388	0.964929	0.941551	0.946708	0.970472	1.39469	1.63087	1.70501	1	0.985699	1.04712	1.03572	0.915168	0.986151	0.959135	1.95034	1.69446	1.57009	1	1.18182	1.13498	1.10027	1.02298	1.10178	1.03741	2.10078	1.69341	2.59089	1
DYRK1B	0.822862	0.86212	1.02945	0.962324	0.828183	1.04244	0.568742	0.737346	0.525273	1	1.0726	1.31745	1.16216	0.86068	1.04839	0.953025	1.29206	1.46685	1.34907	1	1.11021	1.03439	1.22399	0.938782	1.09506	0.943912	1.31042	1.16096	1.62633	1
E2F4	0.760992	0.553815	0.553789	1.2895	1.2239	1.31968	1.54936	1.65365	1.83256	1	0.90788	0.889399	0.834794	1.32037	1.35366	1.48057	1.34286	1.56286	1.12764	1	0.841667	0.885717	0.843937	1.52044	1.54176	1.58005	1.5516	1.38687	1.21858	1
E4F1	0.394148	0.381636	0.446194	0.734197	0.639107	0.586901	2.21472	2.93064	3.95496	1	0.48398	0.445154	0.565096	0.834267	0.885401	0.831263	2.81213	3.17025	3.04965	1	0.527069	0.598079	0.490492	1.0592	1.22901	1.12167	2.73949	2.07637	2.50897	1
EAF1	0.808759	0.942506	0.77021	0.977007	0.943302	1.34844	1.98756	2.61279	2.37684	1	0.904641	0.953612	0.855984	1.13744	0.957811	1.15024	2.14986	2.60568	1.56436	1	0.682124	0.668031	0.707767	1.24271	1.29882	1.1597	2.44462	2.15278	3.01418	1
EAPP	0.821003	0.901843	0.768644	0.888882	0.740028	1.25168	1.59487	1.69829	0.498881	1	1.11147	0.852292	1.01804	0.970617	1.06878	1.00314	1.43193	1.48604	1.5638	1	0.98891	1.08362	1.17895	1.5122	2.00092	1.93553	1.96823	1.59524	3.06939	1
EARS2	0.371651	0.409858	0.424419	1.95193	1.84519	2.01432	0.875644	1.01256	0.728794	1	0.178998	0.170921	0.210007	2.05543	1.90517	2.31438	0.617222	0.845764	0.430659	1	0.366651	0.274368	0.363339	1.88128	1.83832	2.21073	0.970695	0.996979	0.622187	1
EBNA1BP2	0.309416	0.29314	0.330713	0.829447	0.762355	0.841088	3.54719	2.80135	3.8457	1	0.343635	0.326073	0.342628	0.814621	0.819063	0.818235	3.86269	2.9107	3.18013	1	0.326169	0.332	0.343135	0.86875	0.876011	0.879799	3.7113	3.63911	6.20885	1
EBP	0.0701663	0.0625473	0.0924152	1.72704	1.49899	1.91691	0.497405	0.539301	0.162537	1	0.179037	0.100229	0.0977397	1.97524	1.62067	2.44313	0.339392	0.706798	0.304112	1	0.237604	0.333836	0.258892	3.24283	2.9804	3.36062	1.13615	1.12738	0.819958	1
ECE1	0.269198	0.285108	0.315036	1.51636	1.42042	1.7598	0.946935	1.31465	0.940641	1	0.382056	0.398704	0.428784	1.88165	1.88125	2.13575	0.917177	1.14261	1.14166	1	0.50438	0.41905	0.436122	2.11556	2.20071	2.36722	1.34666	1.28652	0.926056	1
ECH1	0.233657	0.266363	0.281431	2.65676	2.58277	2.32487	1.05902	0.920437	0.622722	1	0.258502	0.29068	0.26763	2.67517	2.38135	2.71189	0.755761	0.873909	0.550802	1	0.269347	0.280376	0.29328	2.18654	2.07129	2.36822	0.740952	0.945948	0.50954	1
ECHDC1	1.21686	1.28292	1.27679	0.961659	0.990076	0.965095	0.612752	0.65022	0.464841	1	1.32088	1.34584	1.31087	0.849541	0.826798	0.824923	0.554378	0.544148	0.539269	1	1.43623	1.48291	1.48968	0.899103	0.940935	0.895677	0.612516	0.635215	0.499861	1
ECHDC2	0.423402	0.480515	0.485192	1.9411	1.88053	1.86695	1.01666	1.04415	0.826909	1	0.232264	0.278556	0.244514	1.84179	1.65335	2.07645	0.849456	0.928254	0.695345	1	0.483163	0.495338	0.487938	2.14911	1.97523	2.23277	1.13296	1.19302	0.906557	1
ECHS1	0.312796	0.339808	0.348968	2.23274	2.29182	2.07845	1.09797	0.999028	0.732403	1	0.23385	0.232193	0.233255	2.59518	2.26441	2.70651	0.778809	0.870124	0.605251	1	0.237348	0.251029	0.283037	2.35008	2.1896	2.4762	0.980373	1.10594	0.724255	1
ECI1	0.375701	0.453358	0.504175	2.13454	1.98918	1.96716	1.00215	1.04655	0.981948	1	0.374457	0.403575	0.369883	1.74377	1.48394	1.87072	0.577739	0.750208	0.592544	1	0.659223	0.69829	0.586911	1.8662	2.04177	2.18311	0.915535	0.888122	0.563038	1
ECI2	0.405215	0.469539	0.418597	2.24984	2.18323	2.1918	1.07813	1.13434	1.01552	1	0.330411	0.310391	0.34382	2.83699	2.3411	2.78603	1.29879	1.22167	0.970862	1	0.316587	0.403758	0.319557	2.12312	2.05184	2.4824	0.886207	0.930335	0.694736	1
ECSIT	0.493357	0.459893	0.657172	1.9147	2.26496	2.2218	0.838353	0.980905	0.71169	1	0.474228	0.428954	0.451098	2.41803	2.16351	2.25051	0.606718	0.783055	0.5387	1	0.466962	0.546736	0.450637	2.10508	2.14264	2.23916	0.97097	1.02209	0.644621	1
EDC3	0.788699	0.764643	0.797453	0.947676	0.893697	0.982703	1.43148	1.8029	2.04848	1	0.795749	0.800619	0.973353	0.940615	0.884591	0.903904	2.45963	2.34316	2.23751	1	0.869644	0.916828	0.967257	0.978516	1.04419	0.959221	2.31255	2.0114	2.29048	1
EDC4	0.643048	0.588364	0.624994	0.747999	0.75409	0.864094	2.0527	2.63258	3.3306	1	0.653766	0.661687	0.579267	0.757661	0.730466	0.79187	3.32756	2.84568	2.83812	1	0.707453	0.73009	0.687799	0.865923	0.961654	0.892403	3.63447	3.04565	4.64556	1
EDEM1	0.653298	0.593935	0.635489	1.87786	1.92306	2.10125	0.990856	1.07412	0.752804	1	0.347359	0.38893	0.37283	2.03342	1.68914	2.11275	1.1692	1.30364	1.00354	1	0.457746	0.392285	0.473591	1.58413	1.63731	1.90863	1.33136	1.40427	1.47002	1
EDF1	0.89698	0.944868	0.916487	1.27404	1.34769	1.16723	1.05168	1.06672	1.23906	1	0.827703	0.809302	0.854993	1.31639	1.29492	1.43608	0.951497	1.0637	0.813589	1	0.992435	1.02661	1.00746	1.27135	1.21243	1.31082	0.939722	0.925866	0.80624	1
EEA1	1.19927	1.20564	1.22212	1.17642	1.09869	1.18411	0.52214	0.595133	0.47386	1	1.10128	1.11791	1.11169	1.0218	1.08744	1.01314	0.467607	0.514431	0.649295	1	1.24953	1.29858	1.25521	1.03087	0.992004	0.994613	0.510989	0.568285	0.42603	1
EED	0.620057	0.567737	0.627457	0.961472	1.04248	1.02983	3.13152	2.62065	3.09236	1	0.615353	0.544528	0.642576	1.00618	1.05245	1.06613	3.13939	2.77494	2.73241	1	0.729423	0.739606	0.686284	1.16627	1.00857	1.18757	2.40113	2.18515	2.80527	1
EEF1A1	1.70974	1.72582	1.67496	0.816712	0.808115	0.688593	0.57088	0.577363	0.648888	1	1.85828	1.90361	1.8843	0.83991	0.829654	0.674207	0.544202	0.587804	0.602465	1	1.56701	1.59699	1.59745	0.640442	0.600102	0.537628	0.48233	0.536281	0.470595	1
EEF1A2	2.1475	2.11458	1.73026	0.65249	0.752194	0.586615	0.325098	0.570172	0.485794	1	1.6154	1.40013	1.66642	1.18103	1.18	1.10873	1.41375	1.32174	1.17254	1	2.03275	1.87167	1.70172	0.643665	0.6826	0.568934	1.37831	1.88138	2.27749	1
EEF1B2	1.50152	1.48355	1.48979	0.847591	0.844792	0.773123	0.582805	0.603603	0.539543	1	1.60394	1.59538	1.64962	0.992259	1.02417	0.925335	0.547161	0.587709	0.731689	1	1.35228	1.34609	1.32041	0.867935	0.814358	0.803652	0.738544	0.738956	0.615113	1
EEF1D	1.35379	1.29687	1.4836	0.714833	0.739937	0.669562	0.599089	0.49907	0.653357	1	1.65086	1.63722	1.72673	0.79663	0.781085	0.705607	0.564707	0.530515	0.705115	1	1.53277	1.60327	1.55664	0.827085	0.750558	0.710857	0.577893	0.576644	0.518317	1
EEF1G	1.57608	1.58601	1.57134	0.787918	0.767314	0.694874	0.63564	0.619766	0.621403	1	1.66579	1.70736	1.65614	0.852343	0.872751	0.748522	0.67682	0.662565	0.816658	1	1.45382	1.47778	1.43247	0.756377	0.696706	0.685596	0.703152	0.722284	0.694328	1
EEF2	1.67992	1.72906	1.67598	0.678454	0.640698	0.523895	0.547297	0.564318	0.593926	1	1.72823	1.7719	1.70094	0.711011	0.711521	0.558534	0.606189	0.587164	0.718392	1	1.63748	1.66373	1.64024	0.631796	0.56477	0.482984	0.585388	0.628325	0.690115	1
EEF2K	1.14175	1.12438	1.07185	0.639361	0.653114	0.612638	1.13582	1.09312	1.12726	1	2.0135	1.87039	1.82973	0.519831	0.581195	0.470815	0.353519	0.439162	0.723594	1	1.39285	2.87181	2.49199	0.945035	1.35133	0.592754	0.568189	0.513854	0.608839	1
EEFSEC	1.2782	1.29472	1.26356	0.852894	0.874446	0.802272	0.840011	1.13228	1.10317	1	1.40677	1.38738	1.34612	0.801625	0.791193	0.730623	0.894367	0.921013	0.839478	1	1.46274	1.39696	1.51574	0.854209	0.781021	0.75524	0.779899	0.803439	0.894493	1
EFHD1	0.665465	0.633756	0.670788	1.49873	1.51059	1.4661	2.08115	2.99232	3.1114	1	0.333006	0.208572	0.22126	0.872358	0.625615	0.838159	2.12355	1.77406	1.70922	1	0.736174	0.601381	0.734324	0.917221	0.972041	0.851617	2.08224	1.83323	2.43085	1
EFHD2	0.78119	0.715354	0.717939	0.743724	0.74245	0.690557	1.18408	1.59718	2.33138	1	1.16916	1.01609	1.00563	0.982161	0.964326	1.06542	2.77724	2.3889	1.85579	1	1.43577	1.32607	1.21282	1.113	1.35375	1.35252	1.48602	1.62734	2.00651	1
EFL1	1.55968	1.51321	1.63067	0.61504	0.57665	0.490285	0.463257	0.564121	0.464518	1	1.76657	1.78573	1.78832	0.657637	0.728569	0.516458	0.404799	0.532695	0.462671	1	1.7538	1.7977	1.78336	0.638872	0.53834	0.441036	0.54852	0.552459	0.573848	1
EFR3A	0.524194	0.496624	0.507109	1.87195	1.79892	1.96774	1.20347	1.13015	1.26846	1	0.435905	0.433636	0.425939	2.0463	1.77901	2.25594	1.05163	1.18302	0.813306	1	0.626127	0.628511	0.618522	1.61323	2.00147	1.89682	1.15271	1.23888	1.11149	1
EFTUD2	0.479516	0.456891	0.483638	0.863036	0.908001	0.993281	3.38988	3.00744	3.45973	1	0.472731	0.440283	0.462459	0.853342	0.857213	0.904929	3.2803	3.09342	3.07169	1	0.509071	0.50342	0.493794	0.958419	1.01577	0.958724	3.41368	3.08062	4.92974	1
EGLN1	1.34236	1.29416	1.46196	0.886897	0.834114	0.774902	0.503562	0.555681	0.639266	1	1.48715	1.46442	1.4849	0.90188	0.886638	0.854549	0.554242	0.654797	0.770952	1	1.63518	1.56095	1.69614	0.936746	0.891651	0.834668	0.743358	0.868807	0.831651	1
EHBP1L1	1.01281	1.00932	1.07493	1.44506	1.32332	1.34213	0.752999	0.720788	0.611625	1	0.958976	0.995552	1.163	1.56239	1.3902	1.47703	0.839343	0.797679	0.815125	1	1.0294	1.1557	1.08982	1.34005	1.20423	1.134	0.725735	0.728767	0.711645	1
EHD1	1.54317	1.55889	1.52981	0.703916	0.702854	0.643516	0.528868	0.552265	0.509664	1	1.73673	1.81369	1.74717	0.755042	0.79612	0.618383	0.579366	0.485205	0.657713	1	1.59846	1.54919	1.57445	0.707942	0.637358	0.586124	0.453163	0.533511	0.480025	1
EHD3	1.13813	1.31696	1.25044	0.994905	0.962404	0.96401	1.24808	1.79222	1.87851	1	1.39267	1.39691	1.44738	0.661967	0.696074	0.510827	0.686814	0.796473	0.755553	1	1.46864	1.73959	1.71952	1.06037	0.98362	1.03906	0.82597	0.76352	0.685638	1
EHD4	1.63463	1.55794	1.63803	1.00843	0.897507	0.908851	0.628104	0.750599	0.618104	1	1.81337	1.66238	1.91406	0.893597	0.943138	0.762148	0.426017	0.549058	0.686381	1	1.41699	1.44624	1.41438	0.668582	0.65212	0.599697	0.52646	0.549019	0.510166	1
EHHADH	0.554446	0.581508	0.513067	1.30937	1.22646	1.13935	1.21148	1.18889	1.35478	1	0.363275	0.450965	0.358168	1.439	1.42317	1.304	2.15917	2.10012	2.80038	1	0.597966	0.620245	0.649712	1.23306	1.49178	1.21766	2.54837	1.96719	3.05766	1
EHMT1	0.497239	0.421965	0.446526	0.579329	0.620493	0.571824	3.59363	3.45487	4.44903	1	0.540543	0.449913	0.502769	0.666459	0.668022	0.757146	4.44909	3.66711	3.66644	1	0.527395	0.450897	0.532705	0.651805	0.718423	0.777257	4.03765	3.0637	5.33282	1
EHMT2	0.389547	0.377081	0.359091	0.525501	0.493148	0.524454	2.88816	3.09796	3.38432	1	0.573618	0.480536	0.493054	0.804886	0.836148	0.819848	4.26667	3.50568	3.44042	1	0.57653	0.62757	0.518815	0.805474	0.806871	0.90527	3.34194	2.83119	4.06211	1
EIF1AD	1.4846	1.44143	1.50165	0.599696	0.708952	0.632652	1.72317	1.64235	2.0851	1	1.40394	1.63982	1.42836	0.635303	0.986307	0.712069	1.07627	0.574479	0.598992	1	1.24249	1.19365	1.31188	0.754528	0.642955	0.588269	0.762654	0.613957	0.985847	1
EIF1AX	2.08526	2.20037	2.08882	1.35771	1.38538	1.10148	0.731135	0.750643	0.551043	1	1.35123	1.33959	1.41742	0.665296	0.701303	0.731497	0.249189	0.387099	0.107984	1	1.30093	1.38435	1.32675	0.69197	0.659573	0.618155	0.322682	0.383229	0.283683	1
EIF1AY	0.011645	0.0137623	0.0116136	0.0136516	0.0148075	0.0121973	0.0205244	0.0777353	0.037938	1	1.99517	1.76893	1.85903	1.19843	1.27418	1.19269	0.745945	0.883401	0.569104	1	1.87959	1.76791	1.83446	1.01434	0.932621	0.963623	0.641767	0.67232	0.645433	1
EIF2A	1.60107	1.62365	1.66894	0.84885	0.769863	0.6824	0.720571	0.697086	0.840652	1	1.64683	1.61279	1.51703	0.720989	0.77292	0.647395	0.619523	0.711721	0.667254	1	1.41465	1.45797	1.31267	0.599318	0.55705	0.52563	0.720501	0.633259	0.77114	1
EIF2AK2	1.47375	1.40882	1.44946	0.776585	0.842581	0.786449	0.846341	0.919891	1.08389	1	1.55981	1.63544	1.57216	0.856219	0.865896	0.766061	1.099	1.15934	1.00195	1	1.43788	1.39748	1.41198	0.731504	0.755922	0.652018	0.850503	0.819167	0.976249	1
EIF2AK4	1.44023	1.33214	1.60874	0.793211	0.742255	0.673887	0.60431	0.641283	0.67239	1	1.14238	1.12854	0.955488	0.732263	0.926039	0.619381	1.38012	0.957118	1.30857	1	1.45936	1.5275	1.44312	0.907791	0.808625	0.639052	0.639302	0.676442	0.677399	1
EIF2B1	1.91928	1.95505	1.96951	0.698108	0.650562	0.563723	0.494115	0.47769	0.502951	1	1.93176	1.94489	2.0054	0.683566	0.767448	0.53253	0.374922	0.44645	0.517459	1	1.7509	1.70021	1.70855	0.623812	0.513406	0.440749	0.379647	0.489391	0.459139	1
EIF2B2	1.32761	1.46782	1.65424	0.623987	0.717874	0.63685	0.506693	0.609808	0.436722	1	1.65222	1.60804	1.78659	0.697002	0.670859	0.562797	0.40854	0.567172	0.472632	1	1.6128	1.62161	1.71041	0.671149	0.602629	0.466826	0.612308	0.526231	0.381062	1
EIF2B3	1.65645	1.59686	1.66561	0.692475	0.703592	0.557252	0.456826	0.465218	0.648572	1	1.67417	1.72511	1.65629	0.763363	0.7332	0.626785	0.585729	0.710966	0.615889	1	1.45217	1.35866	1.37528	0.615888	0.655076	0.535927	0.928474	0.810898	0.970979	1
EIF2B4	1.76646	1.75044	1.59003	0.647615	0.606428	0.48806	0.481822	0.479481	0.551333	1	1.77367	1.82474	1.65376	0.605879	0.66863	0.451758	0.475524	0.474705	0.596212	1	1.47185	1.724	1.66709	0.588059	0.593138	0.522163	0.429524	0.416716	0.624237	1
EIF2B5	1.83621	1.85496	1.74276	0.754662	0.766458	0.610591	0.542703	0.478003	0.559886	1	1.7878	1.75529	1.81732	0.7796	0.834043	0.59486	0.627246	0.604078	0.787959	1	1.51462	1.44742	1.57766	0.678071	0.642179	0.523623	0.757059	0.822437	0.997725	1
EIF2D	1.53373	1.58877	1.43267	0.811643	0.900231	0.873865	0.618733	0.729316	0.835886	1	1.35081	1.34653	1.31102	0.756799	0.799296	0.713126	0.671784	0.746875	0.694164	1	1.53187	1.52113	1.59183	0.920809	0.856935	0.766627	0.693926	0.791505	0.680416	1
EIF2S1	1.43607	1.45148	1.45664	0.794715	0.807943	0.707389	0.977433	0.891063	1.06159	1	1.51842	1.51884	1.49701	0.765979	0.793776	0.667735	0.946926	0.857331	0.963986	1	1.50393	1.47238	1.40975	0.719276	0.680857	0.582311	0.82971	0.82316	1.0367	1
EIF2S2	1.50282	1.50223	1.55088	0.741231	0.766855	0.67073	0.920761	0.97738	1.22956	1	1.43206	1.45513	1.44997	0.777465	0.773134	0.689958	1.1165	1.03424	1.10452	1	1.37351	1.37165	1.42872	0.666052	0.623776	0.565092	0.880216	0.793192	0.998807	1
EIF2S3	1.17465	1.22062	1.17522	1.14422	1.1768	1.05177	0.870938	0.861473	1.11726	1	1.38851	1.44695	1.43794	0.972409	0.968557	0.891296	1.04508	1.03028	0.966613	1	1.37656	1.33231	1.24867	0.707323	0.713434	0.636815	0.949876	0.998674	1.18118	1
EIF3A	1.60522	1.59581	1.61063	0.761303	0.748727	0.700657	0.585782	0.565891	0.619349	1	1.70043	1.68686	1.66983	0.788718	0.827881	0.699604	0.654004	0.666328	0.708393	1	1.52978	1.58785	1.53111	0.707074	0.630276	0.587178	0.679752	0.664197	0.73604	1
EIF3B	1.55357	1.60138	1.52706	0.758992	0.767662	0.711392	0.602759	0.638091	0.631601	1	1.68079	1.73807	1.63582	0.783147	0.82134	0.710355	0.542714	0.55821	0.714374	1	1.53837	1.59309	1.48375	0.73686	0.715452	0.641238	0.657665	0.628564	0.650195	1
EIF3C	1.16261	1.22734	1.09839	0.903903	0.93815	0.952799	0.902786	0.701481	0.820064	1	1.50136	1.35537	1.39196	0.947007	1.04941	0.742073	0.684355	0.620531	0.432666	1	1.35764	1.18797	1.22527	0.865824	0.666533	0.95428	0.470263	0.726622	0.311368	1
[truncated: 4,925 more rows]

## Sheet: TableS1-DeqMSoutput
Protein accession	PSM count - median all sets	logFC - cyto ctrl vs 60	P.Value- cyto ctrl vs 60	corrected.P.Value(FDR) - cyto ctrl vs 60	logFC - nuc ctrl vs 60	P.Value- nuc ctrl vs 60	corrected.P.Value(FDR) - nuc ctrl vs 60	logFC - Mem ctrl vs 60	P.Value- Mem ctrl vs 60	corrected.P.Value(FDR) - mem ctrl vs 60
[truncated: 6,572 more rows]

[truncated: 1 more sheets: TableS1-Transloc. Candidates]
